# Supplementary material
Source: publisher figshare collection journal article supplement (https://acs.figshare.com/ndownloader/files/4118701)
Supplement: Supplementary file 1 [file 4118701]

## Sheet: Antibacterial_Statistics
Supporting Information: The comparison of average (Avg) compound property values of three datasets representing antibacterials, non-antibacterials, and drugs targeting human proteins. Antibacterials are further divided into nine classes and their comparison is also shown. [Abbreviations: Database (DB), Antibacterials (AB), Non-Antibacterials (NAB), Drugs for Human Proteins (DHP), Aminoglycosides …
Category	Class	N	Descriptors
			HBA		HBD		nN		nO		RB		SlogP		TPSA		Weight		LV		OV		Rings
			Avg	SD	Avg	SD	Avg	SD	Avg	SD	Avg	SD	Avg	SD	Avg	SD	Avg	SD	Avg	SD	Avg	SD	Avg	SD
Antibacterials (AB)	Aminoglycoside (AQ)	24	9.9167	2.379	5.5417	2.1012	4.75	1.299	9.9167	2.379	7.25	2.2032	-9.2577	2.924	271.42	58.395	510.71	67.818	2.4583	0.57584	4.7917	0.57584	3.2083	0.57584
	Beta-lactam (BL)	104	4.3365	1.8637	1.6635	0.81584	4.6442	2.13	5.8269	1.477	7.8365	2.5158	-1.5177	1.5172	153.91	40.795	450.13	87.773	0.81731	0.9174	1.4327	1.2307	3.4904	0.73374
	Macrolide (ML)	26	10.5	2.8589	3.4231	1.9049	1.7692	1.6712	12	3.4973	8.8077	4.7557	1.3752	1.4297	183.77	41.75	726.12	150.56	2.0769	0.91664	3.3462	0.82938	3.4615	1.0824
	Oxazolidinone (OX)	6	4	1.291	1.5	0.5	4.5	1.2583	4.6667	1.4907	6.8333	1.7717	1.1601	0.63809	107.91	18.619	411.57	47.905	0.16667	0.37268	1.1667	0.68718	3.6667	0.4714
	Peptide (PE)	24	14.083	6.7077	12	6.4743	12.625	4.599	16.125	8.4128	25.667	18.785	-4.6937	5.5413	459.62	187.03	1224.6	519.99	2.6667	0.74536	4.5	1.354	4.9583	3.6683
	Quinolone (QL)	41	1.9024	1.3758	0.12195	0.39479	3.0244	0.92361	3.5366	0.99014	3.0976	1.1	-0.29325	1.0292	87.848	19.458	362.48	61.982	0.04878	0.30851	0.31707	0.7136	3.8537	0.75097
	Sulfonamides (SL)	27	3.1852	1.3344	1.8519	0.44752	3.6296	0.82319	2.9259	1.245	3.8519	1.5325	1.3514	0.63455	103.52	21.167	289.16	63.74	0.11111	0.41574	0.11111	0.41574	2.0741	0.53927
	Tetracycline (TC)	17	4.2941	2.7174	4.1176	0.58232	2.4118	1.2395	8.5882	1.1406	4.1765	2.5949	-1.94	1.4426	195.02	19.879	502.66	53.118	1.8235	1.0424	3.0588	0.87249	4.2353	0.42418
	Miscellaneous (ML)	48	6.875	5.126	3.3125	2.2282	2.5417	1.8592	8.0417	5.7553	8.5833	5.1995	2.308	2.3079	153.74	77.158	569.24	278.91	1.2708	1.254	2.3958	1.9973	3.6667	2.2205
	All	317	5.9653	4.7241	3.0789	3.6551	4.2839	3.3145	7.3407	5.059	8.1672	8.064	-1.0968	3.7493	176.87	114.85	531.07	298.22	1.1356	1.2009	2.0473	1.8799	3.5741	1.6
Non-antibacterial (NAB)		317	3.7571	1.8289	1.776	1.0964	3.2934	1.4027	3.2902	1.9157	5.8864	2.7902	2.7122	1.3525	92.281	35.567	353.56	93.256	0.16404	0.48142	0.56151	0.95325	2.7287	1.0151
Drugs for Human Proteins (DHP)		527	2.8292	2.6535	1.3074	1.8348	2.1935	2.1877	3.26	3.2943	5.8558	5.8383	1.6755	2.6943	78.4	65.172	352.98	181.65	0.28083	0.70836	0.67552	1.2379	2.7989	1.65
Supporting Information: t-test results between antibacterial and non-antibacterial compounds for each molecular descriptor.
Descriptor	p-Values
HBA	4.09512e-14
HBD	1.67671e-09
nN	1.62841e-06
nO	1.85823e-33
RB	1.1746e-06
SlogP	4.80611e-47
TPSA	9.49373e-30
Weight	4.88539e-22
LV	9.56918e-33
OV	1.30076e-29
Rings	7.7974e-15

## Sheet: Antibacterial_Data
Number	Database	DrugBank	PubChem_ID	Generic_Name	Class	Major_Class	MOA	InChI	InChIKey	IUPACName	MolecularFormula	HBA	HBD	RB	LV	OV	Rings	SlogP	TPSA	nN	nO	Weight	Smiles	PharmAction	Synonym	Comment
1	Antibacterial	DB00994	8378	Neomycin	Aminoglycoside	Aminoglycoside	30S Ribosome	InChI=1S/C23H46N6O13/c24-2-7-13(32)15(34)10(28)21(37-7)40-18-6(27)1-5(26)12(31)20(18)42-23-17(36)19(9(4-30)39-23)41-22-11(29)16(35)14(33)8(3-25)38-22/h5-23,30-36H,1-4,24-29H2/t5-,6+,7-,8+,9-,10-,11-,12+,13-,14-,15-,16-,17-,18-,19-,20-,21-,22-,23+/m1/s1	PGBHMTALBVVCIT-VCIWKGPPSA-N	(2R,3S,4R,5R,6R)-5-amino-2-(aminomethyl)-6-[(1R,2R,3S,4R,6S)-4,6-diamino-2-[(2S,3R,4S,5R)-4-[(2R,3R,4R,5S,6S)-3-amino-6-(aminomethyl)-4,5-dihydroxyoxan-2-yl]oxy-3-hydroxy-5-(hydroxymethyl)oxolan-2-yl]oxy-3-hydroxycyclohexyl]oxyoxane-3,4-diol	C23H46N6O13	13	7	9	3	5	4	-13.1961	362.83	6	13	620.698	O1C(C[NH3+])C(O)C(O)C([NH3+])C1OC1C(O)C(OC1CO)OC1C(OC2OC(C[NH3+])C(O)C(O)C2[NH3+])C([NH3+])CC([NH3+])C1O	Anti-Bacterial Agents;Anti-Infective Agents;Pharmacologic Actions;Chemical Actions and Uses;Therapeutic Uses	neomycin;Framycetin;NEOMYCIN B;Mycifradin;Soframycin;Fradiomycin;Soframycine;Neomas;Antibiotique;Fradiomycinum;Framycetinum;Actiline;Enterfram;Framicetina;Framycetine;Framygen;Nivemycin;Actilin;Myacyne;Neolate;Fradiomycin B;Caswell No. 595;Vonamycin powder V;Neobiotic;Neobrettin;Neomcin;Neomin;Neo-Fradin;Neo-Rx;Neomycin B sulfate;Framycetinum [INN-Latin];Neomicina [DCIT];Neomycinum;Tuttomycin;CCR…	Patent Number: EP2305695A2;Crystal Structure Of Hiv-1 Subtype F Dis Extended Duplex Rna Bound To Neomycin;PDB Accession Code 2FCY;Crystal Structure Of The Bacterial Ribosome From Escherichia Coli In Complex With Neomycin. This File Contains The 30s Subunit Of The Second 70s Ribosome, With Neomycin Bound. The Entire Crystal Structure Contains Two 70s Ribosomes And Is Described In Remark 400.;Sacch…
2	Antibacterial	DB00479	37768	Amikacin	Aminoglycoside	Aminoglycoside	30S Ribosome	InChI=1S/C22H43N5O13/c23-2-1-8(29)20(36)27-7-3-6(25)18(39-22-16(34)15(33)13(31)9(4-24)37-22)17(35)19(7)40-21-14(32)11(26)12(30)10(5-28)38-21/h6-19,21-22,28-35H,1-5,23-26H2,(H,27,36)/t6-,7+,8-,9+,10+,11-,12+,13+,14+,15-,16+,17-,18+,19-,21+,22+/m0/s1	LKCWBDHBTVXHDL-RMDFUYIESA-N	(2S)-4-amino-N-[(1R,2S,3S,4R,5S)-5-amino-2-[(2S,3R,4S,5S,6R)-4-amino-3,5-dihydroxy-6-(hydroxymethyl)oxan-2-yl]oxy-4-[(2R,3R,4S,5S,6R)-6-(aminomethyl)-3,4,5-trihydroxyoxan-2-yl]oxy-3-hydroxycyclohexyl]-2-hydroxybutanamide	C22H43N5O13	13	9	11	3	5	3	-11.2914	338.42	5	13	589.64	O1C(C[NH3+])C(O)C(O)C(O)C1OC1C(O)C(OC2OC(CO)C(O)C([NH3+])C2O)C(NC(=O)C(O)CC[NH3+])CC1[NH3+]	Pharmacologic Actions;Anti-Bacterial Agents;Anti-Infective Agents;Chemical Actions and Uses;Therapeutic Uses	amikacin;Amicacin;Amikavet;Amiglyde-V;amikacine;Amikacina;Amikacinum;Amikin;Arikace;Briclin;Kaminax;Lukadin;Mikavir;Antibiotic BB-K 8;Amikacine [INN-French];Amikacinum [INN-Latin];Amikacina [INN-Spanish];BB-K8;BB-K 8;Amikacin Base;Amikacin Dihydrate;AMIKACIN SULFATE;Amikin (Disulfate);CHEBI:2637;HSDB 3583;Amikacin (USP/INN);1-N-(L(-)-gamma-Amino-alpha-hydroxybutyryl)kanamycin A;AC1Q5JTM;ANTIBIOTI…	Classifications: C07D215/227, C07D215/36, C07D215/48, C07D231/12, C07D233/56, C07D249/08, C07D401/06, C07D401/12, C07D405/04, C07D405/06, C07D409/04, C07D409/06, C07D471/04;Hits: Description;"Substance included in EPA DSSTox FDAMDD: FDA Maximum (Recommended) Daily Dose Database File <a href=""http://www.epa.gov/ncct/dsstox/sdf_fdamdd.html""target=""_blank"">[link to DSSTox SDF Download Page]</a>"…
3	Antibacterial	DB00684	36294	Tobramycin	Aminoglycoside	Aminoglycoside	30S Ribosome	InChI=1S/C18H37N5O9/c19-3-9-8(25)2-7(22)17(29-9)31-15-5(20)1-6(21)16(14(15)28)32-18-13(27)11(23)12(26)10(4-24)30-18/h5-18,24-28H,1-4,19-23H2/t5-,6+,7+,8-,9+,10+,11-,12+,13+,14-,15+,16-,17+,18+/m0/s1	NLVFBUXFDBBNBW-PBSUHMDJSA-N	(2S,3R,4S,5S,6R)-4-amino-2-[(1S,2S,3R,4S,6R)-4,6-diamino-3-[(2R,3R,5S,6R)-3-amino-6-(aminomethyl)-5-hydroxyoxan-2-yl]oxy-2-hydroxycyclohexyl]oxy-6-(hydroxymethyl)oxane-3,5-diol	C18H37N5O9	9	5	6	2	5	3	-9.8798	276.27	5	9	472.56	O1C(CO)C(O)C([NH3+])C(O)C1OC1C(O)C(OC2OC(C[NH3+])C(O)CC2[NH3+])C([NH3+])CC1[NH3+]	Pharmacologic Actions;Chemical Actions and Uses;Anti-Bacterial Agents;Anti-Infective Agents;Therapeutic Uses	tobramycin;Nebramycin 6;Tenebrimycin;Tobramitsetin;Tobramycetin;Tenemycin;Tobrex;Nebramycin factor 6;Nebramycin VI;Tobradistin;NEBRAMYCIN;Tobracin;Tobramaxin;Tobramicin;3'-Deoxykanamycin B;Aktob;1-Epitobramycin;Deoxykanamycin B;Nebcin;Tobi;Gotabiotic;Tobramicina;Tobramycine;Tobramycinum;Tobacin;Tobralex;Tobrased;Lilly 47663;Tobracin (TN);Tobradex;Nebramycin factir 6;Tobramycine [INN-French];Tobra…	For further information visit GEO Series Microarray Experiment Accession ID GSE10030 <a href="http://www.ncbi.nlm.nih.gov/geo/query/acc.cgi?acc=GSE10030target=_blank">Display GEO Series Webpage</a>;"For further information visit GEO Series Microarray Experiment Accession ID GSE9989 <a href=""http://www.ncbi.nlm.nih.gov/geo/query/acc.cgi?acc=GSE9989target=_blank"">Display GEO Series Webpage</a>";M…
4	Antibacterial	DB00798	3467	Gentamicin	Aminoglycoside	Aminoglycoside	30S Ribosome	InChI=1S/C21H43N5O7/c1-9(25-3)13-6-5-10(22)19(31-13)32-16-11(23)7-12(24)17(14(16)27)33-20-15(28)18(26-4)21(2,29)8-30-20/h9-20,25-29H,5-8,22-24H2,1-4H3	CEAZRRDELHUEMR-UHFFFAOYSA-N	2-[4,6-diamino-3-[3-amino-6-[1-(methylamino)ethyl]oxan-2-yl]oxy-2-hydroxycyclohexyl]oxy-5-methyl-4-(methylamino)oxane-3,5-diol	C21H43N5O7	7	3	7	2	5	3	-7.5303	213.75	5	7	482.643	O1C(OC2C(O)C(OC3OCC(O)(C)C([NH2+]C)C3O)C([NH3+])CC2[NH3+])C([NH3+])CCC1C([NH2+]C)C	Protein Synthesis Inhibitors;Anti-Bacterial Agents;Anti-Infective Agents;Chemical Actions and Uses;Enzyme Inhibitors;Molecular Mechanisms of Pharmacological Action;Therapeutic Uses;Pharmacologic Actions	gentamicin;Garamycin;Gentacycol;GENTAMYCIN;Gentamycinum;Cidomycin;Gentamicins;Gentavet;Uromycine;Garasol;Gentamicina;Gentamicine;Gentamicinum;Gentocin;Refobacin;Gentamycin-creme;Refobacin TM;G-Myticin;Gentacidin;Alcomicin;Bristagen;Gentafair;Gentamar;Jenamicin;Apogen;Gentak;Spectro-Genta;Gentamycin-creme [German];Ocu-Mycin;Gentamcin Sulfate;Gentamicin sulphate sterile;Gentamicine [INN-French];Gen…	2-[4,6-bis(azanyl)-3-[3-azanyl-6-[1-(methylamino)ethyl]oxan-2-yl]oxy-2-oxidanyl-cyclohexyl]oxy-5-methyl-4-(methylamino)oxane-3,5-diol;"<a href=""http://ctd.mdibl.org/detail.go?view=gene&type=chem&acc=D005839"">Genes and Proteins</a>";Publication Date: 2011-03-09;Classifications: C07D487/04, C07D519/00;Classifications: C07K14/435A3, A61K31/16, A61K31/47, C07D215/44, C07H21/04, C12N15/62;Groups: ap…
5	Antibacterial	DB00919	15541	Spectinomycin	Aminoglycoside	Aminoglycoside	30S Ribosome	InChI=1S/C14H24N2O7/c1-5-4-6(17)14(20)13(21-5)22-12-10(19)7(15-2)9(18)8(16-3)11(12)23-14/h5,7-13,15-16,18-20H,4H2,1-3H3/t5-,7-,8+,9+,10+,11-,12-,13+,14+/m1/s1	UNFWWIHTNXNPBV-WXKVUWSESA-N		C14H24N2O7	7	3	2	1	3	3	-4.978	138.67	2	7	334.369	O1C2C(OC3OC(CC(=O)C13O)C)C(O)C([NH2+]C)C(O)C2[NH2+]C	Anti-Bacterial Agents;Anti-Infective Agents;Chemical Actions and Uses;Therapeutic Uses;Pharmacologic Actions	Spectinomycin;actinospectacin;Togamycin;Trobicin;Espectinomicina;Spectam;Antibiotic 2233wp;Spectinomycine;Spectinomycinum;Actinospectacina;Spectinomicina [Italian];Actinospectacina [Italian];Spectinomycine [INN-French];Spectinomycinum [INN-Latin];Espectinomicina [INN-Spanish];Spectinomicina;Prospec (TN);Stanilo;Adspec (TN);SPCM;Spectinomycin (INN);Spectinomycin Di HCl;1695-77-8;U 18409 E;Spectrum…	Same as: <a href="http://pubchem.ncbi.nlm.nih.gov/summary/summary.cgi?sid=96025211">D08526</a>;Groups: approved;"Same as: <a href=""http://pubchem.ncbi.nlm.nih.gov/summary/summary.cgi?sid=5164"">C02078</a>";NIAID ChemDB HIV, Opportunistic Infections and Tuberculosis Therapeutics Database;Activity: Antibiotic, aminoglycoside;PDB Accession Code 2QOW;"Substance included in EPA DSSTox GEOGSE: Nationa…
6	Antibacterial	DB00955	441306	Netilmicin	Aminoglycoside	Aminoglycoside	30S Ribosome	InChI=1S/C21H41N5O7/c1-4-26-13-7-12(24)16(32-19-11(23)6-5-10(8-22)31-19)14(27)17(13)33-20-15(28)18(25-3)21(2,29)9-30-20/h5,11-20,25-29H,4,6-9,22-24H2,1-3H3/t11-,12+,13-,14+,15-,16-,17+,18-,19-,20-,21+/m1/s1	CIDUJQMULVCIBT-MQDUPKMGSA-N	(2R,3R,4R,5R)-2-[(1S,2S,3R,4S,6R)-4-amino-3-[[(2S,3R)-3-amino-6-(aminomethyl)-3,4-dihydro-2H-pyran-2-yl]oxy]-6-(ethylamino)-2-hydroxycyclohexyl]oxy-5-methyl-4-(methylamino)oxane-3,5-diol	C21H41N5O7	7	3	8	2	5	3	-7.4035	213.75	5	7	480.627	O1C(OC2C(O)C(OC3OCC(O)(C)C([NH2+]C)C3O)C([NH2+]CC)CC2[NH3+])C([NH3+])CC=C1C[NH3+]	Protein Synthesis Inhibitors;Anti-Infective Agents;Therapeutic Uses;Anti-Bacterial Agents;Pharmacologic Actions;Chemical Actions and Uses;Enzyme Inhibitors;Molecular Mechanisms of Pharmacological Action	netilmicin;Netilmicina;Netilmicine;Netilmicinum;Netilmicin (INN);Netira (TN);AC1L9AXV;1-N-Ethylsisomicin;Prestwick3_001101;CHEMBL1572;BSPBio_001202;Nettacin;NETILMICIN SULFATE;BPBio1_001324;Netromycin;Netillin;1-N-Aethylsisomicin;Sch 20569;Sch-20569;NCGC00179265-01;AB00514048;C07657;D08268;56391-56-1;(2R,3R,4R,5R)-2-[(1S,2S,3R,4S,6R)-4-amino-3-[[(2S,3R)-3-amino-6-(aminomethyl)-3,4-dihydro-2H-pyra…	ATC code: J01GB07 S01AA23;Discovery of selective bioactive small molecules by targeting an RNA dynamic ensemble.;Natural Products, Unspecified Origin;Nature Chemical Biology, doi: 10.1038/nchembio.596, published online 26 June 2011;Activity: Antibiotic, aminoglucosidase;FREE BASE OR 2:5 SULFATE SALT(4333);NIAID ChemDB HIV, Opportunistic Infections and Tuberculosis Therapeutics Database;"Same as: …
7	Antibacterial	DB01082	19649	Streptomycin	Aminoglycoside	Aminoglycoside	30S Ribosome	InChI=1S/C21H39N7O12/c1-5-21(36,4-30)16(40-17-9(26-2)13(34)10(31)6(3-29)38-17)18(37-5)39-15-8(28-20(24)25)11(32)7(27-19(22)23)12(33)14(15)35/h4-18,26,29,31-36H,3H2,1-2H3,(H4,22,23,27)(H4,24,25,28)/t5-,6-,7+,8-,9-,10-,11+,12-,13-,14+,15+,16-,17-,18-,21+/m0/s1	UCSJYZPVAKXKNQ-HZYVHMACSA-N	2-[(1R,2R,3S,4R,5R,6S)-3-(diaminomethylideneamino)-4-[(2R,3R,4R,5S)-3-[(2S,3S,4S,5R,6S)-4,5-dihydroxy-6-(hydroxymethyl)-3-(methylamino)oxan-2-yl]oxy-4-formyl-4-hydroxy-5-methyloxolan-2-yl]oxy-2,5,6-trihydroxycyclohexyl]guanidine	C21H39N7O12	12	7	9	3	5	3	-13.0261	344.23	7	12	584.604	O1C(CO)C(O)C(O)C([NH2+]C)C1OC1C(O)(C=O)C(OC1OC1C([NH+]=C(N)N)C(O)C([NH+]=C(N)N)C(O)C1O)C	Anti-Bacterial Agents;Anti-Infective Agents;Therapeutic Uses;Pharmacologic Actions;Protein Synthesis Inhibitors;Chemical Actions and Uses;Enzyme Inhibitors;Molecular Mechanisms of Pharmacological Action	streptomycin;Streptomycin A;Streptomycin sulphate;Streptomycin (TN);Streptomycin & EEP;Streptomycin (INN);Liposomal Streptomycin;Streptomycin & Propolis;Streptomycin, Sulfate Salt;AC1L2EK8;AC1Q29OE;Streptomycin A sulfate;Bio-0644;CHEBI:17076;Streptomycin sulfate;Streptomycin Sesquisulfate Hydrate;NSC14083;DB01082;NCGC00159339-02;LS-187084;C00413;D08531;57-92-1;SRY;NSC 14083;[2-deoxy-2-(dimethylam…	Publication Date: 2011-04-20;Classifications: C07D401/12;Patent Number: EP2305033A1;"<a href=""http://worldwide.espacenet.com/publicationDetails/biblio?FT=D&CC=EP&NR=2311453A1&KC=A1"">(+)-2-[1-(3-Ethoxy-4-methoxyphenyl)-2-methylsulfonylethyl]-4-acetylaminoisoindoline-1,3-dione: methods of using and compositions thereof</a>";Patent Number: EP2292592A1;Activity: Antibiotic; Aminoglycoside;Applicant…
8	Antibacterial	DB01172	6032	Kanamycin A	Aminoglycoside	Aminoglycoside	30S Ribosome	InChI=1S/C18H36N4O11/c19-2-6-10(25)12(27)13(28)18(30-6)33-16-5(21)1-4(20)15(14(16)29)32-17-11(26)8(22)9(24)7(3-23)31-17/h4-18,23-29H,1-3,19-22H2/t4-,5+,6-,7-,8+,9-,10-,11-,12+,13-,14-,15+,16-,17-,18-/m1/s1	SBUJHOSQTJFQJX-NOAMYHISSA-N	(2R,3S,4S,5R,6R)-2-(aminomethyl)-6-[(1R,2R,3S,4R,6S)-4,6-diamino-3-[(2S,3R,4S,5S,6R)-4-amino-3,5-dihydroxy-6-(hydroxymethyl)oxan-2-yl]oxy-2-hydroxycyclohexyl]oxyoxane-3,4,5-triol	C18H36N4O11	11	7	6	2	5	3	-10.1586	289.09	4	11	488.535	O1C(C[NH3+])C(O)C(O)C(O)C1OC1C(O)C(OC2OC(CO)C(O)C([NH3+])C2O)C([NH3+])CC1[NH3+]	Anti-Bacterial Agents;Anti-Infective Agents;Chemical Actions and Uses;Molecular Mechanisms of Pharmacological Action;Therapeutic Uses;Enzyme Inhibitors;Pharmacologic Actions;Protein Synthesis Inhibitors	KANAMYCIN A;kanamycin;Kanamicina;Kanamycine;Kanamycinum;Kanamycin Base;Kanamicina [Italian];KM (the Antibiotic);Kanamycine [INN-French];Kanamycinum [INN-Latin];59-01-8;CHEBI:17630;HSDB 3107;EINECS 200-411-7;Kantrex;KAN;BRN 0061647;4,6-Diamino-2-hydroxy-1,3-cyclohexane 3,6'diamino-3,6'-dideoxydi-alpha-D-glucoside;Klebcil;Glucopyranoside, 4,6-diamino-2-hydroxy-1,3-cyclohexylene 3,6'-diamino-3,6'-di…	Transferase;Crystal Structure Of Bmrr Bound To Kanamycin;"Crystal Structure Of 3',5""-Aminoglycoside Phosphotransferase Type Iiia Adp Kanamycin A Complex Transferase Mol_id: 1; Molecule: Aminoglycoside 3'-Phosphotransferase; Chain: A; Synonym: Kanamycin Kinase Type Iii, Neomycin-Kanamycin Phosphotransferase Type Iii, Aph(3')iii; Ec: 2.7.1.95; Engineered: Yes";Crystal Structure Of Bmrr Bound To Ka…
9	Antibacterial	DB01421	165580	Paromomycin	Aminoglycoside	Aminoglycoside	30S Ribosome	InChI=1S/C23H45N5O14/c24-2-7-13(32)15(34)10(27)21(37-7)41-19-9(4-30)39-23(17(19)36)42-20-12(31)5(25)1-6(26)18(20)40-22-11(28)16(35)14(33)8(3-29)38-22/h5-23,29-36H,1-4,24-28H2/t5-,6+,7+,8-,9-,10-,11-,12+,13-,14-,15-,16-,17-,18-,19-,20-,21-,22-,23+/m1/s1	UOZODPSAJZTQNH-LSWIJEOBSA-N	(2S,3S,4R,5R,6R)-5-amino-2-(aminomethyl)-6-[(2R,3S,4R,5S)-5-[(1R,2R,3S,5R,6S)-3,5-diamino-2-[(2S,3R,4R,5S,6R)-3-amino-4,5-dihydroxy-6-(hydroxymethyl)oxan-2-yl]oxy-6-hydroxycyclohexyl]oxy-4-hydroxy-2-(hydroxymethyl)oxolan-3-yl]oxyoxane-3,4-diol	C23H45N5O14	14	8	9	3	5	4	-12.4457	355.42	5	14	620.674	O1C(C[NH3+])C(O)C(O)C([NH3+])C1OC1C(O)C(OC1CO)OC1C(OC2OC(CO)C(O)C(O)C2[NH3+])C([NH3+])CC([NH3+])C1O	Chemical Actions and Uses;Pharmacologic Actions;Therapeutic Uses;Anti-Bacterial Agents;Anti-Infective Agents;Antiparasitic Agents;Antiprotozoal Agents;Amebicides	paromomycin;Aminosidin;Humatin;Paramomycin Sulfate;Paromomycin (TN);Hydroxymycin sulfate;Aminosidine, sulfate;Paromomycin (INN);hATT & Paromomycin;AC1L4WW9;catenulin;PA1-PA2-PA3-PA4;Paromomycin I;CHEMBL370143;Neomycin E;Paromomycin sulfate Rx346208;STOCK1N-08708;AMINOSIDINE;DB01421;Human .alpha.-1-antitrypsin & Paromomyin;C00832;D07467;PAROMOMYCIN I, AMMINOSIDIN, CATENULIN, CRESTOMYCIN, MONOMYCIN…	Crystal Structure Of Hiv-1 Subtype F Dis Extended Duplex Rna Bound To Paromomycin Hiv-1, Rna, Antibiotic, Paromomycin, Extended Duplex Mol_id: 1; Molecule: Hiv-1 Subtype F Genomic Rna; Chain: A, B; Engineered: Yes;PDB Accession Code 1IBK;PDB Accession Code 3C44;Crystal Structure Of The Homo Sapiens Mitochondrial Ribosomal Decoding Site In The Presence Of Srcl2 (A1555g Mutant, Br-Derivative);PDB A…
10	Antibacterial	DB03615	33042	Ribostamycin	Aminoglycoside	Aminoglycoside	30S Ribosome	InChI=1S/C17H34N4O10/c18-2-6-10(24)12(26)8(21)16(28-6)30-14-5(20)1-4(19)9(23)15(14)31-17-13(27)11(25)7(3-22)29-17/h4-17,22-27H,1-3,18-21H2/t4-,5+,6-,7-,8-,9+,10-,11-,12-,13-,14-,15-,16-,17+/m1/s1	NSKGQURZWSPSBC-VVPCINPTSA-N	(2R,3S,4R,5R,6R)-5-amino-2-(aminomethyl)-6-[(1R,2R,3S,4R,6S)-4,6-diamino-2-[(2S,3R,4S,5R)-3,4-dihydroxy-5-(hydroxymethyl)oxolan-2-yl]oxy-3-hydroxycyclohexyl]oxyoxane-3,4-diol	C17H34N4O10	10	6	6	2	5	3	-9.5195	268.86	4	10	458.509	O1C(C[NH3+])C(O)C(O)C([NH3+])C1OC1C(OC2OC(CO)C(O)C2O)C(O)C([NH3+])CC1[NH3+]	Anti-Bacterial Agents;Anti-Infective Agents;Chemical Actions and Uses;Pharmacologic Actions;Therapeutic Uses	ribostamycin;Vistamycin;Hetangmycin;Xylostatin;Ribastamin;Dekamycin IV;Antibiotic SF 733;Ribostamicina;Ribostamycine;Ribostamycinum;Bu 1709;SF 733;Ribostamycine [INN-French];Ribostamycinum [INN-Latin];Ribostamicina [INN-Spanish];25546-65-0;CHEBI:10003;EINECS 247-091-5;NSC138925;NSC 138925;BRN 1357280;D-Streptamine, O-2,6-diamino-2,6-dideoxy-alpha-D-glucopyranosyl-(1-4)- O-(beta-D-ribofuranosyl-(1…	Is a reactant of enzyme EC: 2.4.1.-;Activity: Antibiotic, aminoglycoside;Crystal Structure Of Hiv-1 Subtype F Dis Extended Duplex Rna Bound To Ribostamycin;"Same as: <a href=""http://pubchem.ncbi.nlm.nih.gov/summary/summary.cgi?sid=96025164"">D08478</a>";Hiv-1 Dis Kissing-Loop In Complex With Ribostamycin Hiv-1, Rna, Aminoglycoside, Antibiotics Mol_id: 1; Molecule: Hiv-1 Dis Rna; Chain: A, B, C, …
11	Antibacterial	DB06696	68682	Arbekacin	Aminoglycoside	Aminoglycoside	30S Ribosome	InChI=1S/C22H44N6O10/c23-4-3-12(30)20(34)28-11-5-10(26)18(37-21-9(25)2-1-8(6-24)35-21)17(33)19(11)38-22-16(32)14(27)15(31)13(7-29)36-22/h8-19,21-22,29-33H,1-7,23-27H2,(H,28,34)/t8-,9+,10-,11+,12-,13+,14-,15+,16+,17-,18+,19-,21+,22+/m0/s1	MKKYBZZTJQGVCD-XTCKQBCOSA-N	(2S)-4-amino-N-[(1R,2S,3S,4R,5S)-5-amino-4-[(2R,3R,6S)-3-amino-6-(aminomethyl)oxan-2-yl]oxy-2-[(2S,3R,4S,5S,6R)-4-amino-3,5-dihydroxy-6-(hydroxymethyl)oxan-2-yl]oxy-3-hydroxycyclohexyl]-2-hydroxybutanamide	C22H44N6O10	10	6	11	3	5	3	-9.9834	305.37	6	10	557.666	O1C(CO)C(O)C([NH3+])C(O)C1OC1C(O)C(OC2OC(CCC2[NH3+])C[NH3+])C([NH3+])CC1NC(=O)C(O)CC[NH3+]	Pharmacologic Actions;Therapeutic Uses;Anti-Infective Agents;Chemical Actions and Uses	Arbekacin;Haberacin;Arbekacina;Arbekacine;Arbekacinum;Arbekacine [French];Arbekacinum [Latin];Arbekacina [Spanish];Arbekacin (INN);Arbekacin [INN];(2s)-4-amino-n-{(1r,2s,3s,4r,5s)-5-amino-2-[(3-amino-3-deoxy-|A-d-glucopyranosyl)oxy]-4-[(2,6-diamino-2,3,4,6-tetradeoxy-|A-d-erythro-hexopyranosyl)oxy]-3-hydroxycyclohexyl}-2-hydroxybutanamide;52444-06-1;D-Streptamine, O-3-amino-3-deoxy-alpha-D-glucop…	Mycins;Activity: Antibiotic, aminoglycoside;Drug / Therapeutic Agent;NIAID ChemDB HIV, Opportunistic Infections and Tuberculosis Therapeutics Database;Target: 16S rRNA of 30S ribosomal subunit, protein synthesis inhibitor;Glycosides;Saccharides;ATC code: J01GB12;Anti-Infective Agents;(2S)-N-[(1R,2S,3S,4R,5S)-4-[(2R,3R,6S)-6-(aminomethyl)-3-azanyl-oxan-2-yl]oxy-5-azanyl-2-[(2S,3R,4S,5S,6R)-4-azany…
12	Antibacterial		3755	Isepamicin	Aminoglycoside	Aminoglycoside	30S Ribosome	InChI=1S/C22H43N5O12/c1-22(35)6-36-20(15(33)18(22)26-2)39-17-8(27-19(34)9(28)4-23)3-7(25)16(14(17)32)38-21-13(31)12(30)11(29)10(5-24)37-21/h7-18,20-21,26,28-33,35H,3-6,23-25H2,1-2H3,(H,27,34)	UDIIBEDMEYAVNG-UHFFFAOYSA-N	3-amino-N-[5-amino-4-[6-(aminomethyl)-3,4,5-trihydroxyoxan-2-yl]oxy-2-[3,5-dihydroxy-5-methyl-4-(methylamino)oxan-2-yl]oxy-3-hydroxycyclohexyl]-2-hydroxypropanamide	C22H43N5O12	12	8	10	3	5	3	-10.701	307.16	5	12	573.641	O1C(C[NH3+])C(O)C(O)C(O)C1OC1C(O)C(OC2OCC(O)(C)C([NH2+]C)C2O)C(NC(=O)C(O)C[NH3+])CC1[NH3+]		Isepamicin;Isepamicine;HAPA-gentamycin B;HAPA-B;Isepamicina;Isepamicinum;3-amino-n-(5-amino-4-[(6-amino-6-deoxyhexopyranosyl)oxy]-2-{[3-deoxy-4-c-methyl-3-(methylamino)pentopyranosyl]oxy}-3-hydroxycyclohexyl)-2-hydroxypropanamide;Sch 21420;Isepamicine [French];Isepamicinum [Latin];Isepamicina [Spanish];CCRIS 1919;Sch-21420;EINECS 261-143-4;BRN 4896716;58152-03-7;AC1Q5ODA;AC1L1GN2;Isepamicin [USAN…	N-[4-[6-(aminomethyl)-3,4,5-tris(oxidanyl)oxan-2-yl]oxy-5-azanyl-2-[5-methyl-4-(methylamino)-3,5-bis(oxidanyl)oxan-2-yl]oxy-3-oxidanyl-cyclohexyl]-3-azanyl-2-oxidanyl-propanamide;Sequoia;Whole Molecule
13	Antibacterial		36119	Sisomicin	Aminoglycoside	Aminoglycoside	30S Ribosome	InChI=1S/C19H37N5O7/c1-19(27)7-28-18(13(26)16(19)24-2)31-15-11(23)5-10(22)14(12(15)25)30-17-9(21)4-3-8(6-20)29-17/h3,9-18,24-27H,4-7,20-23H2,1-2H3/t9-,10+,11-,12+,13-,14-,15+,16-,17-,18-,19+/m1/s1	URWAJWIAIPFPJE-YFMIWBNJSA-N	(2R,3R,4R,5R)-2-[(1S,2S,3R,4S,6R)-4,6-diamino-3-[[(2S,3R)-3-amino-6-(aminomethyl)-3,4-dihydro-2H-pyran-2-yl]oxy]-2-hydroxycyclohexyl]oxy-5-methyl-4-(methylamino)oxane-3,5-diol	C19H37N5O7	7	3	6	2	5	3	-7.7449	224.78	5	7	452.573	O1C(OC2C(O)C(OC3OCC(O)(C)C([NH2+]C)C3O)C([NH3+])CC2[NH3+])C([NH3+])CC=C1C[NH3+]	Protein Synthesis Inhibitors;Chemical Actions and Uses;Enzyme Inhibitors;Molecular Mechanisms of Pharmacological Action;Pharmacologic Actions;Anti-Bacterial Agents;Anti-Infective Agents;Therapeutic Uses	sisomicin;Rickamicin;Sisomycin;Antibiotic 66-40;Antibiotic 6640;Sisomicina;Sisomicine;Sisomicinum;Sissomicin;Dehydrogentamicin Cla;Sch 13475;Sisomicin [USAN:INN];Sisomicine [INN-French];Sisomicinum [INN-Latin];Sisomicina [INN-Spanish];Sch-13475;EINECS 251-018-2;Siseptin;32385-11-8;BRN 1357913;D-Streptamine, O-3-deoxy-4-C-methyl-3-(methylamino)-beta-L-arabinopyranosyl-(1-6)-O-(2,6-diamino-2,3,4,6-…	Activity: Antibacterial;Nature Chemical Biology, doi: 10.1038/nchembio.596, published online 26 June 2011;Stelzer et al.;Protein Synthesis Inhibitors;(2R,3R,4R,5R)-2-[(1S,2S,3R,4S,6R)-3-[[(2S,3R)-6-(aminomethyl)-3-azanyl-3,4-dihydro-2H-pyran-2-yl]oxy]-4,6-bis(azanyl)-2-oxidanyl-cyclohexyl]oxy-5-methyl-4-(methylamino)oxane-3,5-diol;Reproductive Effect;NIAID ChemDB HIV, Opportunistic Infections and…
14	Antibacterial		65345	Astromicin	Aminoglycoside	Aminoglycoside	30S Ribosome	InChI=1S/C17H35N5O6/c1-7(19)9-5-4-8(20)17(27-9)28-15-11(21)13(24)16(26-3)12(14(15)25)22(2)10(23)6-18/h7-9,11-17,24-25H,4-6,18-21H2,1-3H3/t7?,8-,9+,11+,12+,13+,14-,15-,16-,17-/m1/s1	BIDUPMYXGFNAEJ-FFRPCIIESA-N	2-amino-N-[(1S,2R,3R,4S,5S,6R)-4-amino-3-[(2R,3R,6S)-3-amino-6-(1-aminoethyl)oxan-2-yl]oxy-2,5-dihydroxy-6-methoxycyclohexyl]-N-methylacetamide	C17H35N5O6	6	2	7	2	3	2	-6.4526	199.02	5	6	409.528	O1C(OC2C([NH3+])C(O)C(OC)C(N(C(=O)C[NH3+])C)C2O)C([NH3+])CCC1C([NH3+])C		Astromicin;Fortimicin A;Astromicina;Astromicine;Astromicinum;Antibiotic KW-1070;Astromicin [INN];Astromicine [INN-French];Astromicinum [INN-Latin];Astromicina [INN-Spanish];KW-1070;XK-70-1;Astromicin (INN);KW 1070;XK 70-1;4-Amino-1-((aminoacetyl)methylamino)-1,4-dideoxy-3-O-(2,6-diamino-2,3,4,6,7-pentadeoxy-beta-L-lyxo-heptopyranosyl)-6-O-methyl-L-chiro-inositol;L-chiro-Inositol, 4-amino-1-((amin…	Drug / Therapeutic Agent;Target: 16S rRNA of 30S ribosomal subunit, protein synthesis inhibitor;NIAID ChemDB HIV, Opportunistic Infections and Tuberculosis Therapeutics Database;2-azanyl-N-[(1S,2R,3S,4S,5R,6R)-4-azanyl-5-[(2R,3R,6S)-3-azanyl-6-(1-azanylethyl)oxan-2-yl]oxy-2-methoxy-3,6-bis(oxidanyl)cyclohexyl]-N-methyl-ethanamide;"Same as: <a href=""http://pubchem.ncbi.nlm.nih.gov/summary/summary…
15	Antibacterial		71201	Bekanamycin	Aminoglycoside	Aminoglycoside	30S Ribosome	InChI=1S/C18H37N5O10/c19-2-6-11(26)12(27)9(23)17(30-6)32-15-4(20)1-5(21)16(14(15)29)33-18-13(28)8(22)10(25)7(3-24)31-18/h4-18,24-29H,1-3,19-23H2/t4-,5+,6+,7+,8-,9+,10+,11+,12+,13+,14-,15+,16?,17+,18+/m0/s1	SKKLOUVUUNMCJE-DNGLBLDUSA-N	(2R,3S,4R,5R,6R)-5-amino-2-(aminomethyl)-6-[(1R,2S,4R,6S)-4,6-diamino-3-[(2S,3R,4S,5S,6R)-4-amino-3,5-dihydroxy-6-(hydroxymethyl)oxan-2-yl]oxy-2-hydroxycyclohexyl]oxyoxane-3,4-diol	C18H37N5O10	10	6	6	2	5	3	-10.909	296.5	5	10	488.559	O1C(C[NH3+])C(O)C(O)C([NH3+])C1OC1C(O)C(OC2OC(CO)C(O)C([NH3+])C2O)C([NH3+])CC1[NH3+]	Nebramycin V;Becanamicina;Bekanamycine;Bekanamycinum;bekanamycin;2'-Amino-2'-deoxykanamycin;Aminodeoxykanamycin;nebramycin factor 5;Bekanamycine [INN-French];Bekanamycinum [INN-Latin];Becanamicina [INN-Spanish];EINECS 225-170-5;NK 1006;BRN 0061646;(1r,2s,4r,6s)-4,6-diamino-3-[(3-amino-3-deoxy-|A-d-glucopyranosyl)oxy]-2-hydroxycyclohexyl 2,6-diamino-2,6-dideoxy-|A-d-glucopyranoside;Bekanamycin [IN…	(2R,3S,4R,5R,6R)-2-(aminomethyl)-5-azanyl-6-[(1R,2S,4R,6S)-4,6-bis(azanyl)-3-[(2S,3R,4S,5S,6R)-4-azanyl-6-(hydroxymethyl)-3,5-bis(oxidanyl)oxan-2-yl]oxy-2-oxidanyl-cyclohexyl]oxy-oxane-3,4-diol;Drug / Therapeutic Agent;Mutation data;Natural Product
16	Antibacterial		72393	Ambutyrosin	Aminoglycoside	Aminoglycoside	30S Ribosome	InChI=1S/C21H41N5O12/c22-2-1-8(28)19(34)26-7-3-6(24)17(37-20-11(25)15(32)13(30)9(4-23)35-20)18(12(7)29)38-21-16(33)14(31)10(5-27)36-21/h6-18,20-21,27-33H,1-5,22-25H2,(H,26,34)/t6-,7+,8+,9+,10+,11+,12-,13+,14+,15+,16+,17+,18+,20+,21+/m0/s1	XEQLFNPSYWZPOW-NUOYRARPSA-N	(2R)-4-amino-N-[(1R,2S,3R,4R,5S)-5-amino-4-[(2R,3R,4R,5S,6R)-3-amino-6-(aminomethyl)-4,5-dihydroxyoxan-2-yl]oxy-3-[(2R,3R,4S,5R)-3,4-dihydroxy-5-(hydroxymethyl)oxolan-2-yl]oxy-2-hydroxycyclohexyl]-2-hydroxybutanamide	C21H41N5O12	12	8	11	3	5	3	-10.6523	318.19	5	12	559.614	O1C(C[NH3+])C(O)C(O)C([NH3+])C1OC1C(OC2OC(CO)C(O)C2O)C(O)C(NC(=O)C(O)CC[NH3+])CC1[NH3+]	Chemical Actions and Uses;Pharmacologic Actions;Anti-Bacterial Agents;Anti-Infective Agents;Therapeutic Uses	Ambutyrosin;Butirosin [INN];Butirosine [INN-French];Butirosinum [INN-Latin];Butirosina [INN-Spanish];Butirosin;(2r)-4-amino-n-[(1r,2s,3r,4r,5s)-5-amino-4-[(2,6-diamino-2,6-dideoxy-|A-d-glucopyranosyl)oxy]-2-hydroxy-3-(|A-d-ribofuranosyloxy)cyclohexyl]-2-hydroxybutanamide;Butirosina;Butirosine;Butirosinum;AC1L2HZP;AC1Q5JTL;UNII-8S52KR0L58;KST-1A1029;12772-35-9;AR-1A2738;2C21H41N5O12.2H2O;LS-47356;…	(2R)-N-[(1R,2S,3R,4R,5S)-4-[(2R,3R,4R,5S,6R)-6-(aminomethyl)-3-azanyl-4,5-bis(oxidanyl)oxan-2-yl]oxy-5-azanyl-3-[(2R,3R,4S,5R)-5-(hydroxymethyl)-3,4-bis(oxidanyl)oxolan-2-yl]oxy-2-oxidanyl-cyclohexyl]-4-azanyl-2-oxidanyl-butanamide;Drug / Therapeutic Agent
17	Antibacterial		107677	Micronomicin	Aminoglycoside	Aminoglycoside	30S Ribosome	InChI=1S/C20H41N5O7/c1-20(28)8-29-19(14(27)17(20)25-3)32-16-12(23)6-11(22)15(13(16)26)31-18-10(21)5-4-9(30-18)7-24-2/h9-19,24-28H,4-8,21-23H2,1-3H3/t9-,10+,11-,12+,13-,14+,15?,16-,17+,18+,19+,20-/m0/s1	DNYGXMICFMACRA-KVJMWFOWSA-N	(2R,3R,4R,5R)-2-[(1S,2S,4S,6R)-4,6-diamino-3-[(2R,3R,6S)-3-amino-6-(methylaminomethyl)oxan-2-yl]oxy-2-hydroxycyclohexyl]oxy-5-methyl-4-(methylamino)oxane-3,5-diol	C20H41N5O7	7	3	7	2	5	3	-7.9188	213.75	5	7	468.616	O1C(OC2C(O)C(OC3OCC(O)(C)C([NH2+]C)C3O)C([NH3+])CC2[NH3+])C([NH3+])CCC1C[NH2+]C	Pharmacologic Actions;Chemical Actions and Uses;Therapeutic Uses;Anti-Bacterial Agents;Anti-Infective Agents	Micronomicin;Micromicin;Sagamicin;Gentamicin C2b;Micromycin;Micronomicina;Micronomicine;Micronomicinum;Santemycin;Antibiotic KW 1062;Antibiotic XK 62-2;Sagamicin (Obs.);Gentamicin C(sub 2b);KW-1062;Micronomicine [INN-French];Micronomicinum [INN-Latin];XK-62-2;Micronomicina [INN-Spanish];6'-N-Methylgentamicin C(sub 1a);DE 020;KW 1062;XK 62-2;52093-21-7;D-Streptamine, O-2-amino-2,3,4,6-tetradeoxy-6…	(2R,3R,4R,5R)-2-[(1S,2S,4S,6R)-4,6-bis(azanyl)-3-[(2R,3R,6S)-3-azanyl-6-(methylaminomethyl)oxan-2-yl]oxy-2-oxidanyl-cyclohexyl]oxy-5-methyl-4-(methylamino)oxane-3,5-diol;Anti-Bacterial Agents;Anti-Infective Agents;Drug / Therapeutic Agent;Natural Product;Reproductive Effect
18	Antibacterial		439369	Vibriomycin	Aminoglycoside	Aminoglycoside	30S Ribosome	InChI=1S/C21H41N7O12/c1-5-21(36,4-30)16(40-17-9(26-2)13(34)10(31)6(3-29)38-17)18(37-5)39-15-8(28-20(24)25)11(32)7(27-19(22)23)12(33)14(15)35/h5-18,26,29-36H,3-4H2,1-2H3,(H4,22,23,27)(H4,24,25,28)/t5-,6-,7+,8-,9-,10-,11+,12-,13-,14+,15+,16-,17-,18-,21+/m0/s1	ASXBYYWOLISCLQ-HZYVHMACSA-N	2-[(1R,2R,3S,4R,5R,6S)-3-(diaminomethylideneamino)-4-[(2R,3R,4R,5S)-3-[(2S,3S,4S,5R,6S)-4,5-dihydroxy-6-(hydroxymethyl)-3-(methylamino)oxan-2-yl]oxy-4-hydroxy-4-(hydroxymethyl)-5-methyloxolan-2-yl]oxy-2,5,6-trihydroxycyclohexyl]guanidine	C21H41N7O12	12	8	9	3	5	3	-13.2327	347.39	7	12	586.62	O1C(CO)C(O)C(O)C([NH2+]C)C1OC1C(O)(CO)C(OC1OC1C([NH+]=C(N)N)C(O)C([NH+]=C(N)N)C(O)C1O)C	Anti-Bacterial Agents;Anti-Infective Agents;Pharmacologic Actions;Chemical Actions and Uses;Therapeutic Uses	dihydrostreptomycin;Abiocine;N,N'''-[(1R,2R,3S,4R,5R,6S)-4-({5-deoxy-2-O-[2-deoxy-2-(methylamino)-alpha-L-glucopyranosyl]-3-C-(hydroxymethyl)-alpha-L-lyxofuranosyl}oxy)-2,5,6-trihydroxycyclohexane-1,3-diyl]diguanidine;128-46-1;NSC402956;Dihydrostreptomycin (INN);AC1L977Q;CHEBI:38291;DST;C01023;D07840;1,1'-[(1R,2R,3S,4R,5R,6S)-4-({5-deoxy-2-O-[2-deoxy-2-(methylamino)-alpha-L-glucopyranosyl]-3-C-(h…	2-[(1R,2R,3S,4R,5R,6S)-3-[bis(azanyl)methylideneamino]-4-[(2R,3R,4R,5S)-4-(hydroxymethyl)-3-[(2S,3S,4S,5R,6S)-6-(hydroxymethyl)-3-(methylamino)-4,5-bis(oxidanyl)oxan-2-yl]oxy-5-methyl-4-oxidanyl-oxolan-2-yl]oxy-2,5,6-tris(oxidanyl)cyclohexyl]guanidine;2.9 A Crystal Structure Of Streptomycin Rna-Aptamer Complex;2.9 A Crystal Structure Of Streptomycin Rna-Aptamer Complex Streptomycin Rna-Aptamer, M…
19	Antibacterial		35766	Hygromycin b	Aminoglycoside	Aminoglycoside	30S Ribosome	InChI=1S/C20H37N3O13/c1-23-7-2-5(21)9(26)15(10(7)27)33-19-17-16(11(28)8(4-25)32-19)35-20(36-17)18(31)13(30)12(29)14(34-20)6(22)3-24/h5-19,23-31H,2-4,21-22H2,1H3/t5-,6+,7+,8-,9+,10-,11+,12-,13-,14-,15-,16+,17+,18-,19+,20?/m1/s1	GRRNUXAQVGOGFE-KPBUCVLVSA-N	(3'R,3aS,4S,4'R,5'R,6R,6'R,7S,7aS)-4-[(1R,2S,3R,5S,6R)-3-amino-2,6-dihydroxy-5-(methylamino)cyclohexyl]oxy-6'-[(1S)-1-amino-2-hydroxyethyl]-6-(hydroxymethyl)spiro[4,6,7,7a-tetrahydro-3aH-[1,3]dioxolo[4,5-c]pyran-2,2'-oxane]-3',4',5',7-tetrol	C20H37N3O13	13	8	6	3	5	4	-9.7304	279.88	3	13	530.548	O1C(C([NH3+])CO)C(O)C(O)C(O)C12OC1C(O2)C(OC(CO)C1O)OC1C(O)C([NH2+]C)CC([NH3+])C1O	hygromycin b;Hydromycin B;Antihelmycin;Hygrovetine;Hygromix-8;Hygromix 2.4;EINECS 250-545-5;BRN 6755837;AI3-29796;AI3-50155;5-O-(2,3-O-(6-Amino-6-desoxyheptapyranosyliden)-beta-D-talopyranosyl)-2-desoxy-N'-methyl-D-streptamin;D-Streptamine, O-6-amino-6-deoxy-L-glycero-D-galacto-heptopyranosylidene-(1-2-3)-O-beta-D-talopyranosyl-(1-5)-2-deoxy-N-(sup 3)-methyl-;Hygrovectine;31282-04-9;AC1L1UDV;CHEM…	Natural Product;NIAID ChemDB HIV, Opportunistic Infections and Tuberculosis Therapeutics Database;Mutation data;ISOLATED FROM STREPTOMYCES HYGROSCUPICUS;Anthelmintics;Antiparasitic Agents;(3'R,3aS,4S,4'R,5'R,6R,6'R,7S,7aS)-4-[(1R,2S,3R,5S,6R)-3-azanyl-5-(methylamino)-2,6-bis(oxidanyl)cyclohexyl]oxy-6'-[(1S)-1-azanyl-2-oxidanyl-ethyl]-6-(hydroxymethyl)spiro[4,6,7,7a-tetrahydro-3aH-[1,3]dioxolo[4,5…	Anti-Bacterial Agents;Anti-Infective Agents;Antiparasitic Agents;Chemical Actions and Uses;Pharmacologic Actions;Therapeutic Uses;Anthelmintics
20	Antibacterial		470999	Dibekacin	Aminoglycoside	Aminoglycoside	30S Ribosome	InChI=1S/C18H37N5O8/c19-4-6-1-2-7(20)17(28-6)30-15-8(21)3-9(22)16(14(15)27)31-18-13(26)11(23)12(25)10(5-24)29-18/h6-18,24-27H,1-5,19-23H2/t6-,7+,8-,9+,10+,11-,12+,13+,14-,15+,16-,17+,18+/m0/s1	JJCQSGDBDPYCEO-XVZSLQNASA-N	(2S,3R,4S,5S,6R)-4-amino-2-[(1S,2S,3R,4S,6R)-4,6-diamino-3-[(2R,3R,6S)-3-amino-6-(aminomethyl)oxan-2-yl]oxy-2-hydroxycyclohexyl]oxy-6-(hydroxymethyl)oxane-3,5-diol	C18H37N5O8	8	4	6	2	5	3	-8.8506	256.04	5	8	456.561	O1C(CO)C(O)C([NH3+])C(O)C1OC1C(O)C(OC2OC(CCC2[NH3+])C[NH3+])C([NH3+])CC1[NH3+]	Chemical Actions and Uses;Therapeutic Uses;Anti-Infective Agents;Anti-Bacterial Agents;Pharmacologic Actions	dibekacin;Orbicin;Icacine;34493-98-6;DKM;CHEBI:37945;Dibekacin (INN);Spectrum_001398;AC1LAM6L;Spectrum2_001528;Spectrum3_000960;Spectrum4_001074;Spectrum5_001613;AC1Q4UA9;KBioGR_001428;KBioSS_001878;SPBio_001316;KBio2_001878;KBio2_004446;KBio2_007014;KBio3_002060;O-3-Amino-3-deoxy-alpha-D-glucopyranosyl-(1-4)-O-(2,6-diamino-2,3,4,6-tetradeoxy-alpha-D-erythro-hexopyranosyl-(1-6))-2-deoxy-L-strepta…	(2S,3R,4S,5S,6R)-2-[(1S,2S,3R,4S,6R)-3-[(2R,3R,6S)-6-(aminomethyl)-3-azanyl-oxan-2-yl]oxy-4,6-bis(azanyl)-2-oxidanyl-cyclohexyl]oxy-4-azanyl-6-(hydroxymethyl)oxane-3,5-diol;Activity: Antibiotic, aminoglycoside;ATC code: J01GB09;"For further information visit the FDA Maximum Recommended Therapeutic Dose Database <a href=""http://www.fda.gov/AboutFDA/CentersOffices/CDER/ucm092199.htm""target=""_bla…
21	Antibacterial		512877	Verdamicin	Aminoglycoside	Aminoglycoside	30S Ribosome	InChI=1S/C20H39N5O7/c1-8(21)12-5-4-9(22)18(30-12)31-15-10(23)6-11(24)16(13(15)26)32-19-14(27)17(25-3)20(2,28)7-29-19/h5,8-11,13-19,25-28H,4,6-7,21-24H2,1-3H3/t8-,9+,10-,11+,13-,14+,15+,16-,17+,18+,19+,20-/m0/s1	XUSXOPRDIDWMFO-CTMSJIKGSA-N	(2R,3R,4R,5R)-2-[(1S,2S,3R,4S,6R)-4,6-diamino-3-[[(2S,3R)-3-amino-6-[(1S)-1-aminoethyl]-3,4-dihydro-2H-pyran-2-yl]oxy]-2-hydroxycyclohexyl]oxy-5-methyl-4-(methylamino)oxane-3,5-diol	C20H39N5O7	7	3	6	2	5	3	-7.3564	224.78	5	7	466.6	O1C(OC2C(O)C(OC3OCC(O)(C)C([NH2+]C)C3O)C([NH3+])CC2[NH3+])C([NH3+])CC=C1C([NH3+])C		Verdamicin;AC1LAFFO;49863-48-1;(2R,3R,4R,5R)-2-[(1S,2S,3R,4S,6R)-4,6-diamino-3-[[(2S,3R)-3-amino-6-[(1S)-1-aminoethyl]-3,4-dihydro-2H-pyran-2-yl]oxy]-2-hydroxycyclohexyl]oxy-5-methyl-4-(methylamino)oxane-3,5-diol	(2R,3R,4R,5R)-2-[(1S,2S,3R,4S,6R)-4,6-bis(azanyl)-3-[[(2S,3R)-3-azanyl-6-[(1S)-1-azanylethyl]-3,4-dihydro-2H-pyran-2-yl]oxy]-2-oxidanyl-cyclohexyl]oxy-5-methyl-4-(methylamino)oxane-3,5-diol;Glycosides;NIAID ChemDB HIV, Opportunistic Infections and Tuberculosis Therapeutics Database
22	Antibacterial	DB00694	30323	Daunorubicin	Aminoglycoside	Aminoglycoside	Nucleic Acid	InChI=1S/C27H29NO10/c1-10-22(30)14(28)7-17(37-10)38-16-9-27(35,11(2)29)8-13-19(16)26(34)21-20(24(13)32)23(31)12-5-4-6-15(36-3)18(12)25(21)33/h4-6,10,14,16-17,22,30,32,34-35H,7-9,28H2,1-3H3/t10-,14-,16-,17-,22+,27-/m0/s1	STQGQHZAVUOBTE-VGBVRHCVSA-N	(7S,9S)-9-acetyl-7-[(2R,4S,5S,6S)-4-amino-5-hydroxy-6-methyloxan-2-yl]oxy-6,9,11-trihydroxy-4-methoxy-8,10-dihydro-7H-tetracene-5,12-dione	C27H29NO10	10	4	4	3	4	5	0.40757	187.46	1	10	528.534	O1C(C)C(O)C([NH3+])CC1OC1CC(O)(Cc2c1c(O)c1c(C(=O)c3c(C1=O)c(OC)ccc3)c2O)C(=O)C	Antineoplastic Agents;Pharmacologic Actions;Chemical Actions and Uses;Therapeutic Uses;Antibiotics, Antineoplastic	daunorubicin;Daunomycin;Rubidomycin;Daunamycin;Daunarubicinum;Daunorrubicina;Daunorubicine;Acetyladriamycin;DaunoXome;Leukaemomycin C;Rubomycin C;Daunorubicinum;Cerubidin;Cerubidine;Anthracyline;(+)-Daunomycin;Daunoblastin;RCRA waste no. U059;Daunorubicinum [INN-Latin];Daunoblastine;CHEBI:41977;RP 13057;Dauno-Rubidomycine;20830-81-3;FI6339;NSC-82151;DaunoXome (TN);CCRIS 914;Rubomycin;Daunorubicin…	Publication Date: 2011-01-12;Structure Of The First Parallel Dna Quadruplex-Drug Complex;Classifications: A61K31/53, A61K45/06, C07D487/04;PDB Accession Code 427D;Formaldehyde Cross-Links Daunorubicin And Dna Efficiently: Hplc And X-Ray Diffraction Studies;Patent Number: EP2277570A2;PDB Accession Code 308D;Publication Date: 2011-01-05;"<a href=""http://worldwide.espacenet.com/publicationDetails/b…
23	Antibacterial	DB04626	3081545	Apramycin	Aminoglycoside	Aminoglycoside	Translocation	InChI=1S/C21H41N5O11/c1-26-11-14(30)18-8(33-20(11)37-21-16(32)13(29)10(25)9(4-27)34-21)3-7(24)19(36-18)35-17-6(23)2-5(22)12(28)15(17)31/h5-21,26-32H,2-4,22-25H2,1H3/t5-,6+,7-,8+,9-,10-,11+,12+,13+,14-,15-,16-,17-,18+,19+,20-,21-/m1/s1	XZNUGFQTQHRASN-XQENGBIVSA-N	(2R,3R,4S,5S,6S)-2-[[(2R,3S,4R,4aR,6S,7R,8aS)-7-amino-6-[(1R,2R,3S,4R,6S)-4,6-diamino-2,3-dihydroxycyclohexyl]oxy-4-hydroxy-3-(methylamino)-2,3,4,4a,6,7,8,8a-octahydropyrano[3,2-b]pyran-2-yl]oxy]-5-amino-6-(hydroxymethyl)oxane-3,4-diol	C21H41N5O11	11	6	6	3	5	4	-10.8427	294.7	5	11	544.623	O1C(CO)C([NH3+])C(O)C(O)C1OC1OC2C(OC(OC3C(O)C(O)C([NH3+])CC3[NH3+])C([NH3+])C2)C(O)C1[NH2+]C		apramycin;CHEBI:2790;Nebramycin II;Apramicina;Apramycine;Apramycinum;AM2;Apramycin (USAN/INN);AC1MIX4B;CHEMBL1230961;MolPort-003-983-409;HMS2090I15;4-O-((8R)-2-Amino-8-O-(4-amino-4-deoxy-alpha-D-glucopyranosyl)-2,3,7-trideoxy-7-(methylamino)-D-glycero-alpha-D-allo-octodialdo-1,5:8,4-dipyranos-1-yl)-2-deoxy-D-streptamine;DNC000243;DB04626;C01555;D02322;(2R,3R,4S,5S,6S)-2-[[(2R,3S,4R,4aR,6S,7R,8aS)…	(2R,3R,4S,5S,6S)-2-[[(2R,3S,4R,4aR,6S,7R,8aS)-7-azanyl-6-[(1R,2R,3S,4R,6S)-4,6-bis(azanyl)-2,3-bis(oxidanyl)cyclohexyl]oxy-3-(methylamino)-4-oxidanyl-2,3,4,4a,6,7,8,8a-octahydropyrano[3,2-b]pyran-2-yl]oxy]-5-azanyl-6-(hydroxymethyl)oxane-3,4-diol;1.5 A X-Ray Crystal Structure Of Apramycin Complex With Rna Fragment GgcgucgcuaguaccgGGUACUAAAAGUCGCCC CONTAINING THE Human Ribosomal Decoding A Site: R…
24	Antibacterial	DB04263	123865	Geneticin	Aminoglycoside	Aminoglycoside	Protein	InChI=1S/C20H40N4O10/c1-6(25)14-11(27)10(26)9(23)18(32-14)33-15-7(21)4-8(22)16(12(15)28)34-19-13(29)17(24-3)20(2,30)5-31-19/h6-19,24-30H,4-5,21-23H2,1-3H3/t6-,7+,8-,9-,10-,11+,12+,13-,14-,15-,16+,17-,18-,19-,20+/m1/s1	BRZYSWJRSDMWLG-DJWUNRQOSA-N	(2R,3R,4R,5R)-2-[(1S,2S,3R,4S,6R)-4,6-diamino-3-[(2S,3R,4R,5S,6R)-3-amino-4,5-dihydroxy-6-[(1R)-1-hydroxyethyl]oxan-2-yl]oxy-2-hydroxycyclohexyl]oxy-5-methyl-4-(methylamino)oxane-3,5-diol	C20H40N4O10	10	6	6	3	5	3	-8.7896	257.83	4	10	500.59	O1C(C(O)C)C(O)C(O)C([NH3+])C1OC1C(O)C(OC2OCC(O)(C)C([NH2+]C)C2O)C([NH3+])CC1[NH3+]	geneticin;G418;antibiotic G 418;antibiotic G-418;49863-47-0;O-2-Amino-2,7-dideoxy-D-glycero-alpha-D-gluco-heptopyranosyl-(1-4)-O-(3-deoxy-4-C-methyl-3-(methylamino)-beta-L-arabinopyranosyl-(1-6))-D-streptamine;BRN 1669188;G 418;Antibiotic G418;(1r,2s,3s,4r,6s)-4,6-diamino-3-{[3-deoxy-4-c-methyl-3-(methylamino)-|A-l-arabinopyranosyl]oxy}-2-hydroxycyclohexyl 2-amino-2,7-dideoxy-d-glycero-|A-d-gluco…	<a href="http://ctd.mdibl.org/detail.go?view=pathway&type=chem&acc=C010680">Pathways</a>;"<a href=""http://worldwide.espacenet.com/publicationDetails/biblio?FT=D&CC=EP&NR=2275413A1&KC=A1"">2,4-di(phenylamino)-pyrimidines useful in the treatment of neoplastic diseases, inflammatory and immune system disorders</a>";Publication Date: 2011-01-19;Applicant(s): GLAXOSMITHKLINE LLC [US];Publication Date…	Chemical Actions and Uses;Therapeutic Uses;Amebicides;Anti-Infective Agents;Antiparasitic Agents;Antiprotozoal Agents;Coccidiostats;Pharmacologic Actions
25	Antibacterial	DB00446	5959	Chloramphenicol	Amphenicols	Miscellaneous	50S Ribosome	InChI=1S/C11H12Cl2N2O5/c12-10(13)11(18)14-8(5-16)9(17)6-1-3-7(4-2-6)15(19)20/h1-4,8-10,16-17H,5H2,(H,14,18)/t8-,9-/m1/s1	WIIZWVCIJKGZOK-RKDXNWHRSA-N	2,2-dichloro-N-[(1R,2R)-1,3-dihydroxy-1-(4-nitrophenyl)propan-2-yl]acetamide	C11H12Cl2N2O5	3	3	7	0	0	1	1.0045	115.38	2	5	323.132	ClC(Cl)C(=O)NC(C(O)c1ccc([N+](=O)[O-])cc1)CO	Protein Synthesis Inhibitors;Anti-Bacterial Agents;Anti-Infective Agents;Chemical Actions and Uses;Enzyme Inhibitors;Molecular Mechanisms of Pharmacological Action;Pharmacologic Actions;Therapeutic Uses	chloramphenicol;Chloromycetin;Globenicol;Halomycetin;Levomycetin;Aquamycetin;Chloramficin;Chloramfilin;Chlornitromycin;Cloramicol;Detreomycin;Enteromycetin;Juvamycetin;Leukomycin;Levomicetina;Oleomycetin;Chloramex;Chlorocol;Chloroamphenicol;D-Chloramphenicol;Chloronitrin;Ciplamycetin;Detreomycine;Intramycetin;Levomitsetin;Mediamycetine;Micochlorine;Novophenicol;Stanomycetin;Alficetyn;Amphenicol;A…	Protein synthesis inhibitors;"For further information visit the FDA Maximum Recommended Therapeutic Dose Database <a href=""http://www.fda.gov/AboutFDA/CentersOffices/CDER/ucm092199.htm""target=""_blank"">Website</a>";PDB Accession Code 3OFC;PDB Accession Code 1QHY;MLSMR_SUPPLIER_STRUCTURE_ID: 857440;"<a target=_blank href=""mailto:sales@ryansci.com?SUBJECT=price and availability of LT00452518"">…
26	Antibacterial	DB08621	27200	Thiamphenicol	Amphenicols	Miscellaneous	50S Ribosome	InChI=1S/C12H15Cl2NO5S/c1-21(19,20)8-4-2-7(3-5-8)10(17)9(6-16)15-12(18)11(13)14/h2-5,9-11,16-17H,6H2,1H3,(H,15,18)/t9-,10-/m1/s1	OTVAEFIXJLOWRX-NXEZZACHSA-N	2,2-dichloro-N-[(1R,2R)-1,3-dihydroxy-1-(4-methylsulfonylphenyl)propan-2-yl]acetamide	C12H15Cl2NO5S	5	3	7	0	0	1	0.4998	103.7	1	5	356.226	ClC(Cl)C(=O)NC(C(O)c1ccc(S(=O)(=O)C)cc1)CO	Anti-Bacterial Agents;Pharmacologic Actions;Anti-Infective Agents;Chemical Actions and Uses;Therapeutic Uses	thiamphenicol;Thiophenicol;(+)-Thiamphenicol;Thiamcol;Dextrosulphenidol;Macphenicol;Thiamphenicolum;Thiocymetin;Urfamicina;Urfamycine;Descocin;Dexawin;Efnicol;Hyrazin;Igralin;Masatirin;Neomyson;Rincrol;D-Thiophenicol;D-Thiocymetin;Unaseran-D;Thiocymetin (TN);Armai (TN);15318-45-3;Tiamfenicolo [DCIT];Methylsulfonylchloramphenicol;Tiamfenicol [INN-Spanish];SW 5063;Thiamphenicolum [INN-Latin];Urophe…	MLSMR_SAMPLE_SUPPLIER: Sigma Chemical Company;"<a target=_blank href=""mailto:sales@spectrumchemical.com?SUBJECT=price and availability of 01503136"">spectrum 01503136</A>";InChIKey: OTVAEFIXJLOWRX-NXEZZACHSA-N;Prestwick:25;"Substance included in EPA DSSTox CPDBAS: Carcinogenic Potency Database (CPDB) Summary Table - All Species Database File <a href=""http://www.epa.gov/ncct/dsstox/sdf_cpdbas.ht…
27	Antibacterial		62858	Azidamfenicol	Amphenicols	Miscellaneous	50S Ribosome	InChI=1S/C11H13N5O5/c12-15-13-5-10(18)14-9(6-17)11(19)7-1-3-8(4-2-7)16(20)21/h1-4,9,11,17,19H,5-6H2,(H,14,18)/t9-,11-/m1/s1	SGRUZFCHLOFYHZ-MWLCHTKSSA-N	2-azido-N-[(1R,2R)-1,3-dihydroxy-1-(4-nitrophenyl)propan-2-yl]acetamide	C11H13N5O5	5	3	8	0	1	1	0.5111	140.1	5	5	295.255	OC(C(NC(=O)CN=[N+]=[N-])CO)c1ccc([N+](=O)[O-])cc1		Azidamfenicol;Azidamfenicolum;Azidanfenicol;Azidoamphenicol;Azidamphenicolum;Leukomycin N;13838-08-9;threo-2-Azido-N-(beta-hydroxy-alpha-(hydroxymethyl)-p-nitrophenethyl)acetamide;D(-)-threo-2-Azido-N-(beta-hydroxy-alpha-(hydroxymethyl)-p-nitrophenethyl)acetamide;Berlicetin;Thilocanfol;Thilocof;Posifenicol (TN);AC1L1XXG;Bayer 52910;Bay f 4797;Azidamfenicolum [INN-Latin];Azidanfenicol [INN-Spanish…	Activity: Antibiotic, chloramphenicol;ATC code: S01AA25;2-azido-N-[(1R,2R)-1-(4-nitrophenyl)-1,3-bis(oxidanyl)propan-2-yl]ethanamide
28	Antibacterial		114811	Florfenicol	Amphenicols	Miscellaneous	50S Ribosome	InChI=1S/C12H14Cl2FNO4S/c1-21(19,20)8-4-2-7(3-5-8)10(17)9(6-15)16-12(18)11(13)14/h2-5,9-11,17H,6H2,1H3,(H,16,18)/t9-,10-/m1/s1	AYIRNRDRBQJXIF-NXEZZACHSA-N	2,2-dichloro-N-[(1R,2S)-3-fluoro-1-hydroxy-1-(4-methylsulfonylphenyl)propan-2-yl]acetamide	C12H14Cl2FNO4S	4	2	7	0	0	1	1.477	83.47	1	4	358.217	ClC(Cl)C(=O)NC(C(O)c1ccc(S(=O)(=O)C)cc1)CF	Anti-Infective Agents;Therapeutic Uses;Chemical Actions and Uses;Anti-Bacterial Agents;Pharmacologic Actions	Florfenicol;Nuflor;(-)-Florfenicol;Sch-25298;Florfenicol [USAN:INN:BAN];73231-34-2;Sch 25298;2,2-Dichloro-N-(1-(fluoromethyl)-2-hydroxy-2-(4-(methylsulfonyl)phenyl)ethyl)acetamide;2,2-dichloro-N-[(1R,2S)-3-fluoro-1-hydroxy-1-(4-methylsulfonylphenyl)propan-2-yl]acetamide;76639-94-6;Acetamide, 2,2-dichloro-N-((1S,2R)-1-(fluoromethyl)-2-hydroxy-2-(4-(methylsulfonyl)phenyl)ethyl)-;Acetamide, 2,2-dich…	Anti-Bacterial Agents;Activity: Antibacterial [veterinary];Drug / Therapeutic Agent;Prestwick:955;Anti-Infective Agents;MLSMR_SUPPLIER_STRUCTURE_ID: Prestw-955;BIOMOL:DL-402;MLSMR_COMPOUND_CLASS: SS;BIOA;MLSMR_SAMPLE_SUPPLIER: Prestwick Chemical, Inc.;Prestwick Chemical, Inc.:12H06;http://mlsmr.evotec.com/MLSMR_HomePage/pdf/pubchem_reference.pdf;2,2-bis(chloranyl)-N-[(1R,2S)-3-fluoranyl-1-(4-meth…
29	Antibacterial	DB00303	150610	Ertapenem	Carbapenem	Beta-lactam	Cell wall	InChI=1S/C22H25N3O7S/c1-9-16-15(10(2)26)20(28)25(16)17(22(31)32)18(9)33-13-7-14(23-8-13)19(27)24-12-5-3-4-11(6-12)21(29)30/h3-6,9-10,13-16,23,26H,7-8H2,1-2H3,(H,24,27)(H,29,30)(H,31,32)/t9-,10-,13+,14+,15-,16-/m1/s1	JUZNIMUFDBIJCM-ANEDZVCMSA-N	(4R,5S,6S)-3-[(3S,5S)-5-[(3-carboxyphenyl)carbamoyl]pyrrolidin-3-yl]sulfanyl-6-[(1R)-1-hydroxyethyl]-4-methyl-7-oxo-1-azabicyclo[3.2.0]hept-2-ene-2-carboxylic acid	C22H25N3O7S	3	2	8	0	2	4	-2.7549	166.51	3	7	474.514	S(C=1C(C2N(C(=O)C2C(O)C)C=1C(=O)[O-])C)C1CC([NH2+]C1)C(=O)Nc1cc(ccc1)C(=O)[O-]	Anti-Bacterial Agents;Anti-Infective Agents;Therapeutic Uses;Chemical Actions and Uses;Pharmacologic Actions	Ertapenem;Ertapenem (INN);Ertapenem [INN];Invanz (TN);CHEBI:404903;UNII-G32F6EID2H;AC1L44OL;CHEMBL1359;153832-46-3;AC-6814;DB00303;LS-187017;LS-187767;D07908;1-Azabicyclo(3.2.0)hept-2-ene-2-carboxylic acid, 3-(((3S,5S)-5-(((3-carboxyphenyl)amino)carbonyl)-3-pyrrolidinyl)thio)-6-((1R)-1-hydroxyethyl-4-methyl-7-oxo-, (4R,5S,6S)-;1-Azabicyclo(3.2.0)hept-2-ene-2-carboxylic acid, 3-((5-(((3-carboxyphe…	Depositor-supplied synonyms are taken from MeSH (Medical Subject Headings).;(4R,5S,6S)-3-[(3S,5S)-5-[(3-carboxyphenyl)carbamoyl]pyrrolidin-3-yl]sulfanyl-4-methyl-6-[(1R)-1-oxidanylethyl]-7-oxidanylidene-1-azabicyclo[3.2.0]hept-2-ene-2-carboxylic acid;Indication: For the treatment the following moderate to severe infections caused by susceptible isolates of the designated microorganisms: (1) compl…
30	Antibacterial	DB00760	441130	Meropenem	Carbapenem	Beta-lactam	Cell wall	InChI=1S/C17H25N3O5S/c1-7-12-11(8(2)21)16(23)20(12)13(17(24)25)14(7)26-9-5-10(18-6-9)15(22)19(3)4/h7-12,18,21H,5-6H2,1-4H3,(H,24,25)/t7-,8-,9+,10+,11-,12-/m1/s1	DMJNNHOOLUXYBV-PQTSNVLCSA-N	(4R,5S,6S)-3-[(3S,5S)-5-(dimethylcarbamoyl)pyrrolidin-3-yl]sulfanyl-6-[(1R)-1-hydroxyethyl]-4-methyl-7-oxo-1-azabicyclo[3.2.0]hept-2-ene-2-carboxylic acid	C17H25N3O5S	3	1	6	0	0	3	-2.6689	117.59	3	5	383.469	S(C=1C(C2N(C(=O)C2C(O)C)C=1C(=O)[O-])C)C1CC([NH2+]C1)C(=O)N(C)C	Chemical Actions and Uses;Anti-Bacterial Agents;Pharmacologic Actions;Anti-Infective Agents;Therapeutic Uses	meropenem;Meropenemum;Antibiotic SM 7338;CHEBI:43968;ICI-194660;SM 7338;96036-03-2;ICI 194660;SM-7338;UNII-YOP6PX0BAO;DMJNNHOOLUXYBV-PQTSNVLCSA-N;HMS2098M14;CCG-100850;BB8DE83A007AF8EC1DC44F007990D84F	Target: penicillin binding protein 2 (PBP2), cell wall synthesis inhibitor;;MLSMR_SAMPLE_SUPPLIER: Sequoia Research Products Ltd.;BIOMOL:DL-167;http://mlsmr.evotec.com/MLSMR_HomePage/pdf/pubchem_reference.pdf;ClinicalTrials_gov;non-genotoxic agent;MLSMR_SUPPLIER_STRUCTURE_ID: SRP02110m;Anti-Bacterial Agents;Prestwick:1106;Drug / Therapeutic Agent;Target: penicillin binding protein 3 (PBP3), cell …
31	Antibacterial	DB01598	104838	Imipenem	Carbapenem	Beta-lactam	Cell wall	InChI=1S/C12H17N3O4S/c1-6(16)9-7-4-8(20-3-2-14-5-13)10(12(18)19)15(7)11(9)17/h5-7,9,16H,2-4H2,1H3,(H2,13,14)(H,18,19)/t6-,7-,9-/m1/s1	ZSKVGTPCRGIANV-ZXFLCMHBSA-N	(5R,6S)-3-[2-(aminomethylideneamino)ethylsulfanyl]-6-[(1R)-1-hydroxyethyl]-7-oxo-1-azabicyclo[3.2.0]hept-2-ene-2-carboxylic acid	C12H17N3O4S	2	1	6	0	1	2	-3.6398	120.66	3	4	299.351	S(CC[NH+]=CN)C=1CC2N(C(=O)C2C(O)C)C=1C(=O)[O-]	Chemical Actions and Uses;Therapeutic Uses;Anti-Infective Agents;Anti-Bacterial Agents;Pharmacologic Actions	imipenem;Tienamycin;Imipemide;N-Formimidoylthienamycin;Primaxin;64221-86-9;Imipenem anhydrous;Imipenem (INN);Prestwick_844;CHEBI:471744;Imipenem, N-Formimidoyl thienamycin;AC1L2XLB;Prestwick0_000519;Prestwick1_000519;Prestwick2_000519;Prestwick3_000519;CHEMBL148;MK 0787;BSPBio_000477;BIDD:GT0686;SPBio_002398;Ambap64221-86-9;BPBio1_000525;(5R,6S)-6-((R)-1-Hydroxyethyl)-3-(2-(iminomethylamino)ethyl…	Drug / Therapeutic Agent;MONOHYDRATE;non-genotoxic agent;Mechanism of action: Imipenem acts as an antimicrobial through the inhibition of cell wall synthesis of various gram-positive and gram-negative bacteria. This inhibition of cell wall synthesis in gram-negative bateria is attained by binding to pencillin binding proteins (PBPs). In E. coli and selected strains of P. aeruginosa, imipenem has …
32	Antibacterial		71339	Biapenem	Carbapenem	Beta-lactam	Cell wall	InChI=1S/C15H18N4O4S/c1-7-11-10(8(2)20)14(21)19(11)12(15(22)23)13(7)24-9-3-17-5-16-6-18(17)4-9/h5-11,20H,3-4H2,1-2H3/t7-,8-,10-,11-/m1/s1	MRMBZHPJVKCOMA-YJFSRANCSA-N	(4R,5S,6S)-3-(6,7-dihydro-5H-pyrazolo[1,2-a][1,2,4]triazol-4-ium-6-ylsulfanyl)-6-[(1R)-1-hydroxyethyl]-4-methyl-7-oxo-1-azabicyclo[3.2.0]hept-2-ene-2-carboxylate	C15H18N4O4S	3	1	4	0	0	4	-1.3622	102.37	4	4	350.399	S(C=1C(C2N(C(=O)C2C(O)C)C=1C(=O)[O-])C)C1Cn2[n+](C1)cnc2	Biapenem;CHEBI:3089;LJC 10627;LJC-10627;L-627;Omegacin;5H-Pyrazolo(1,2-a)(1,2,4)triazol-4-ium, 6-((2-carboxy-6-(1-hydroxyethyl)-4-methyl-7-oxo-1-azabicyclo(3.2.0)hept-2-en-3-yl)thio)-6,7-dihydro-, hydroxide, inner salt, (4R-(4alpha,5beta,6beta(R*)))-;120410-24-4;Omegacin (TN);Biapenem [USAN:INN];UNII-YR5U3L9ZH1;AC1L2FZ5;Biapenem (JAN/USAN/INN);CHEMBL285347;C15H18N4O4S;CLI 86815;CLI-86815;LJC10,62…	Target: D-alanyl-D-alanine carboxypeptidase inhibitor;"<a target=_blank href=""noteTL8000539"">Trylead Chemical TL8000539</A>";Activity: Antibacterial;"<a target=_blank href=""mailto:anusuabag@apacss.com?SUBJECT=price and availability of 815542"">APAC Sourcing Solutions 815542</A>";"<a target=_blank href=""mailto:info@seqchem.com?SUBJECT=price and availability of 120410-24-4"">Sequoia Research Pr…	Chemical Actions and Uses;Pharmacologic Actions;Therapeutic Uses;Anti-Infective Agents
33	Antibacterial		73303	Doripenem	Carbapenem	Beta-lactam	Cell wall	InChI=1S/C15H24N4O6S2/c1-6-11-10(7(2)20)14(21)19(11)12(15(22)23)13(6)26-9-3-8(17-5-9)4-18-27(16,24)25/h6-11,17-18,20H,3-5H2,1-2H3,(H,22,23)(H2,16,24,25)/t6-,7-,8+,9+,10-,11-/m1/s1	AVAACINZEOAHHE-VFZPANTDSA-N	(4R,5S,6S)-6-[(1R)-1-hydroxyethyl]-4-methyl-7-oxo-3-[(3S,5S)-5-[(sulfamoylamino)methyl]pyrrolidin-3-yl]sulfanyl-1-azabicyclo[3.2.0]hept-2-ene-2-carboxylic acid	C15H24N4O6S2	4	3	7	1	3	3	-3.964	169.47	4	6	420.511	S(C=1C(C2N(C(=O)C2C(O)C)C=1C(=O)[O-])C)C1CC([NH2+]C1)CNS(=O)(=O)N		Doripenem;Doribax;Doripenem (USAN/INN);AC1L2JMJ;UNII-BHV525JOBH;CHEMBL491571;Finibax;NCGC00167510-01;FT-0081127;D03895;S 4661;S-4661;I14-8431;148016-81-3;(4R,5S,6S)-6-[(1R)-1-hydroxyethyl]-4-methyl-7-oxo-3-[(3S,5S)-5-[(sulfamoylamino)methyl]pyrrolidin-3-yl]sulfanyl-1-azabicyclo[3.2.0]hept-2-ene-2-carboxylic acid;1-Azabicyclo(3.2.0)hept-2-ene-2-carboxylic acid, 3-(((3S,5S)-5-(((aminosulfonyl)amino…	(4R,5S,6S)-4-methyl-6-[(1R)-1-oxidanylethyl]-7-oxidanylidene-3-[(3S,5S)-5-[(sulfamoylamino)methyl]pyrrolidin-3-yl]sulfanyl-1-azabicyclo[3.2.0]hept-2-ene-2-carboxylic acid;Activity: Antibiotic;Antibacterial;Carbapenem;ATC code: J01DH04
34	Antibacterial		115235	Panipenem	Carbapenem	Beta-lactam	Cell wall	InChI=1S/C15H21N3O4S.C10H11NO3/c1-7(19)12-10-5-11(13(15(21)22)18(10)14(12)20)23-9-3-4-17(6-9)8(2)16;12-9(13)6-7-11-10(14)8-4-2-1-3-5-8/h7,9-10,12,16,19H,3-6H2,1-2H3,(H,21,22);1-5H,6-7H2,(H,11,14)(H,12,13)/t7-,9+,10-,12-;/m1./s1	JQWGVORAFCVYJN-TXVDJMPOSA-N	3-benzamidopropanoic acid; (5R,6S)-3-[(3S)-1-ethanimidoylpyrrolidin-3-yl]sulfanyl-6-[(1R)-1-hydroxyethyl]-7-oxo-1-azabicyclo[3.2.0]hept-2-ene-2-carboxylic acid	C25H32N4O7S	2	1	5	0	0	3	-2.4556	109.5	3	4	339.416	S(C=1CC2N(C(=O)C2C(O)C)C=1C(=O)[O-])C1CCN(C1)C(=[NH2+])C	Anti-Bacterial Agents;Anti-Infective Agents;Therapeutic Uses;Pharmacologic Actions;Chemical Actions and Uses	Panipenem-betamipron;Papm-BP;Panipenem mixture with betamipron;138240-65-0;3-(1-(Acetimidoylpyrrolidin-3-yl)thio)-6-(1-hydroxyethyl)-7-oxo-1-azabicyclo(3.2.0)hept-2-ene-2-carboxylic acid combination with N-benzoyl-beta-alanine;beta-Alanine, N-benzoyl-, mixt. with (5R,6S)-6-((1R)-1-hydroxyethyl)-3-(((3S)-1-(1-iminoethyl)-3-pyrrolidinyl)thio)-7-oxo-1-azabicyclo(3.2.o)hept-2-ene-2-carboxylic acid;be…	Anti-Infective Agents;3-benzamidopropanoic acid; (5R,6S)-3-[(3S)-1-ethanimidoylpyrrolidin-3-yl]sulfanyl-6-[(1R)-1-oxidanylethyl]-7-oxidanylidene-1-azabicyclo[3.2.0]hept-2-ene-2-carboxylic acid;ATC code: J01DH55;Anti-Bacterial Agents
35	Antibacterial	DB00229	20848883	Cefotiam	Cephalosporin	Beta-lactam	Cell wall	InChI=1S/C18H23N9O4S3.ClH/c1-25(2)3-4-26-18(22-23-24-26)34-7-9-6-32-15-12(14(29)27(15)13(9)16(30)31)21-11(28)5-10-8-33-17(19)20-10;/h8,12,15H,3-7H2,1-2H3,(H2,19,20)(H,21,28)(H,30,31);1H/t12-,15-;/m1./s1	SVSFIELZISOJDT-XRZFDKQNSA-N	(6R,7R)-7-[[2-(2-amino-1,3-thiazol-4-yl)acetyl]amino]-3-[[1-[2-(dimethylamino)ethyl]tetrazol-5-yl]sulfanylmethyl]-8-oxo-5-thia-1-azabicyclo[4.2.0]oct-2-ene-2-carboxylic acid hydrochloride	C18H24ClN9O4S3	6	2	11	2	2	4	-3.13863	176.49	9	4	525.639	s1cc(nc1N)CC(=O)NC1C2SCC(CSc3nnnn3CC[NH+](C)C)=C(N2C1=O)C(=O)[O-]	Therapeutic Uses;Chemical Actions and Uses;Pharmacologic Actions;Anti-Bacterial Agents;Anti-Infective Agents	CEFOTIAM HYDROCHLORIDE;Cefotiam hcl;Cefotiam dihydrochloride;Abbott 48999;SCE-963;CGP-14221/E;66309-69-1;SCE-963 dihydrochloride;MLS002153835;CHEMBL1200589;HMS1569B05;CGP 14221/E;SMR001233198;(6R-trans)-7-(((2-amino-4-thiazolyl)acetyl)amino)-3-(((1-(2-(dimethylamino)ethyl)-1H-tetrazol-5-yl)thio)methyl)-8-oxo-5-thia-1-azabicyclo(4.2.0)oct-2-ene-2-carboxylic acid dihydrochloride	MLSMR_COMPOUND_CLASS: NP SS;MLSMR_SUPPLIER_STRUCTURE_ID: Prestw-482;http://mlsmr.evotec.com/MLSMR_HomePage/pdf/pubchem_reference.pdf;Prestwick:482;SALT: 1 hydrogen chloride;FDA_Orange_Book_Extended;MLSMR_SAMPLE_SUPPLIER: Prestwick Chemical, Inc.
36	Antibacterial	DB00267	9570757	Cefmenoxime	Cephalosporin	Beta-lactam	Cell wall	InChI=1S/C16H17N9O5S3/c1-24-16(20-22-23-24)33-4-6-3-31-13-9(12(27)25(13)10(6)14(28)29)19-11(26)8(21-30-2)7-5-32-15(17)18-7/h5,9,13H,3-4H2,1-2H3,(H2,17,18)(H,19,26)(H,28,29)/b21-8-/t9-,13-/m1/s1	HJJDBAOLQAWBMH-YCRCPZNHSA-N	(6R,7R)-7-[[(2Z)-2-(2-amino-1,3-thiazol-4-yl)-2-methoxyiminoacetyl]amino]-3-[(1-methyltetrazol-5-yl)sulfanylmethyl]-8-oxo-5-thia-1-azabicyclo[4.2.0]oct-2-ene-2-carboxylic acid	C16H17N9O5S3	7	2	9	2	2	4	-1.8453	193.64	9	5	510.56	s1cc(nc1N)C(=NOC)C(=O)NC1C2SCC(CSc3nnnn3C)=C(N2C1=O)C(=O)[O-]	cefmenoxime;Cefmenoxima;Cefmenoximum;Cefmax;65085-01-0;A 50912;SCE 1365;Cefmenoxime (INN);Cefmenoxime [INN];AB 50912;Cefmenoximum [INN-Latin];Cefmenoxima [INN-Spanish];(6R,7R)-7-((Z)-2-(2-Amino-4-thiazolyl)-2-methoxyiminoacetamido)-3-((1-methyl-1H-5-tetraazolylthio)methyl)-8-oxo-5-thia-1-azabicyclo(4.2.0)oct-2-en-2-carbonsaeure;(6R,7R)-(2-(2-Amino-4-thiazolyl)glyoxylamido)-3-(1-methyl-1H-tetrazol…	Activity: Antibiotic, cephalosporin;Anti-Bacterial Agents;Anti-Infective Agents;Antibiotics;ATC code: J01DD05;"For further information visit the FDA Maximum Recommended Therapeutic Dose Database <a href=""http://www.fda.gov/AboutFDA/CentersOffices/CDER/ucm092199.htm""target=""_blank"">Website</a>";Structure Shown: tested chemical;"Substance included in EPA DSSTox FDAMDD: FDA Maximum (Recommended)…	Pharmacologic Actions;Anti-Bacterial Agents;Anti-Infective Agents;Therapeutic Uses;Chemical Actions and Uses
37	Antibacterial	DB00274	42008	Cefmetazole	Cephalosporin	Beta-lactam	Cell wall	InChI=1S/C15H17N7O5S3/c1-21-14(18-19-20-21)30-6-8-5-29-13-15(27-2,17-9(23)7-28-4-3-16)12(26)22(13)10(8)11(24)25/h13H,4-7H2,1-2H3,(H,17,23)(H,24,25)/t13-,15+/m1/s1	SNBUBQHDYVFSQF-HIFRSBDPSA-N	(6R,7S)-7-[[2-(cyanomethylsulfanyl)acetyl]amino]-7-methoxy-3-[(1-methyltetrazol-5-yl)sulfanylmethyl]-8-oxo-5-thia-1-azabicyclo[4.2.0]oct-2-ene-2-carboxylic acid	C15H17N7O5S3	7	1	11	1	2	3	-1.70382	166.16	7	5	470.535	S1C2N(C(=O)C2(OC)NC(=O)CSCC#N)C(C(=O)[O-])=C(C1)CSc1nnnn1C	Chemical Actions and Uses;Pharmacologic Actions;Therapeutic Uses;Anti-Bacterial Agents;Anti-Infective Agents	cefmetazole;Cefmetazolum;Cefmetazolo;Cefmetazolum [INN-Latin];Cefmetazolo [INN-Spanish];56796-20-4;SKF 83088;CS 1170;CHEBI:3489;Cefmetazole (USP/INN);Prestwick0_000700;Prestwick1_000700;Prestwick2_000700;Prestwick3_000700;EINECS 260-384-2;Cefmetazole [USAN:INN];Cefmetazole Monosodium Salt;AC1L26WS;BRN 0634647;Lopac0_000266;UNII-3J962UJT8H;BSPBio_000859;SPBio_002780;BPBio1_000945;C15H17N7O5S3;U 72…	(6R,7S)-7-[2-(cyanomethylsulfanyl)ethanoylamino]-7-methoxy-3-[(1-methyl-1,2,3,4-tetrazol-5-yl)sulfanylmethyl]-8-oxidanylidene-5-thia-1-azabicyclo[4.2.0]oct-2-ene-2-carboxylic acid;Reproductive Effect;NIAID ChemDB HIV, Opportunistic Infections and Tuberculosis Therapeutics Database;"Substance included in EPA DSSTox FDAMDD: FDA Maximum (Recommended) Daily Dose Database File <a href=""http://www.epa…
38	Antibacterial	DB00430	636405	Cefpiramide	Cephalosporin	Beta-lactam	Cell wall	InChI=1S/C25H24N8O7S2/c1-11-7-16(35)15(8-26-11)20(36)27-17(12-3-5-14(34)6-4-12)21(37)28-18-22(38)33-19(24(39)40)13(9-41-23(18)33)10-42-25-29-30-31-32(25)2/h3-8,17-18,23,34H,9-10H2,1-2H3,(H,26,35)(H,27,36)(H,28,37)(H,39,40)/t17-,18-,23-/m1/s1	PWAUCHMQEXVFJR-PMAPCBKXSA-N	(6R,7R)-7-[[(2R)-2-(4-hydroxyphenyl)-2-[(6-methyl-4-oxo-1H-pyridine-3-carbonyl)amino]acetyl]amino]-3-[(1-methyltetrazol-5-yl)sulfanylmethyl]-8-oxo-5-thia-1-azabicyclo[4.2.0]oct-2-ene-2-carboxylic acid	C25H24N8O7S2	8	4	11	2	3	5	-1.3161	211.57	8	7	611.64	S1C2N(C(=O)C2NC(=O)C(NC(=O)C2=CNC(=CC2=O)C)c2ccc(O)cc2)C(C(=O)[O-])=C(C1)CSc1nnnn1C	Chemical Actions and Uses;Pharmacologic Actions;Anti-Bacterial Agents;Anti-Infective Agents;Therapeutic Uses	cefpiramide;Cefpiramido;Cefpiramidum;CHEBI:59213;AC1LCS6B;Cefpiramide (USP/INN);WY-44635;NCGC00167444-01;70797-11-4;D03428;CHEMBL1201204;WY 44;(6R,7R)-7-[[(2R)-2-(4-hydroxyphenyl)-2-[(6-methyl-4-oxo-1H-pyridine-3-carbonyl)amino]acetyl]amino]-3-[(1-methyltetrazol-5-yl)sulfanylmethyl]-8-oxo-5-thia-1-azabicyclo[4.2.0]oct-2-ene-2-carboxylic acid;(6R,7R)-7-{[(2R)-2-{[(4-hydroxy-6-methylpyridin-3-yl)ca…	Activity: Antibacterial;ATC code: J01DD11;Target: D-alanyl-D-alanine carboxypeptidase inhibitor;(6R,7R)-7-[[(2R)-2-(4-hydroxyphenyl)-2-[(6-methyl-4-oxidanylidene-1H-pyridin-3-yl)carbonylamino]ethanoyl]amino]-3-[(1-methyl-1,2,3,4-tetrazol-5-yl)sulfanylmethyl]-8-oxidanylidene-5-thia-1-azabicyclo[4.2.0]oct-2-ene-2-carboxylic acid
39	Antibacterial	DB00438	5481173	Ceftazidime	Cephalosporin	Beta-lactam	Cell wall	InChI=1S/C22H22N6O7S2/c1-22(2,20(33)34)35-26-13(12-10-37-21(23)24-12)16(29)25-14-17(30)28-15(19(31)32)11(9-36-18(14)28)8-27-6-4-3-5-7-27/h3-7,10,14,18H,8-9H2,1-2H3,(H4-,23,24,25,29,31,32,33,34)/b26-13-/t14-,18-/m1/s1	ORFOPKXBNMVMKC-DWVKKRMSSA-N	(6R,7R)-7-[[(2Z)-2-(2-amino-1,3-thiazol-4-yl)-2-(2-carboxypropan-2-yloxyimino)acetyl]amino]-8-oxo-3-(pyridin-1-ium-1-ylmethyl)-5-thia-1-azabicyclo[4.2.0]oct-2-ene-2-carboxylate	C22H22N6O7S2	4	2	10	2	2	4	-2.3675	194.05	6	7	545.577	s1cc(nc1N)C(=NOC(C(=O)[O-])(C)C)C(=O)NC1C2SCC(C[n+]3ccccc3)=C(N2C1=O)C(=O)[O-]	ceftazidime;ceftazidima;ceftazidimum;Ceftazidime (TN);Ceftazidime (INN);Ceftazidime anhydrous;Ceptaz;Fortaz;Ceptaz (TN);Fortaz (TN);72558-82-8;AC1NUK7U;Ceftazidimum [INN-Latin];Ceftazidima [INN-Spanish];Fortaz In Plastic Container;BIDD:GT0734;CHEBI:3508;HMS2090M13;Pentacef;Tazicef;Tazidime;Ceftazidime Sodium In Plastic Container;DB00438;AB00513848;C06889;D07654;UNII-9M416Z9QNR;Tazidime In Plastic…	Activity: Antibiotic, cephalosporin;"For further information visit the FDA Maximum Recommended Therapeutic Dose Database <a href=""http://www.fda.gov/AboutFDA/CentersOffices/CDER/ucm092199.htm""target=""_blank"">Website</a>";"Same as: <a href=""http://pubchem.ncbi.nlm.nih.gov/summary/summary.cgi?sid=9106"">C06889</a>";Groups: approved;"Substance included in EPA DSSTox FDAMDD: FDA Maximum (Recomme…	Anti-Bacterial Agents;Anti-Infective Agents;Chemical Actions and Uses;Pharmacologic Actions;Therapeutic Uses
40	Antibacterial	DB00447	5284585	Loracarbef	Cephalosporin	Beta-lactam	Cell wall	InChI=1S/C16H16ClN3O4/c17-9-6-7-10-12(15(22)20(10)13(9)16(23)24)19-14(21)11(18)8-4-2-1-3-5-8/h1-5,10-12H,6-7,18H2,(H,19,21)(H,23,24)/t10-,11-,12+/m1/s1	JAPHQRWPEGVNBT-UTUOFQBUSA-N	(6R,7S)-7-[[(2R)-2-amino-2-phenylacetyl]amino]-3-chloro-8-oxo-1-azabicyclo[4.2.0]oct-2-ene-2-carboxylic acid	C16H16ClN3O4	2	1	5	0	0	3	-1.2452	117.18	3	4	349.774	ClC=1CCC2N(C(=O)C2NC(=O)C([NH3+])c2ccccc2)C=1C(=O)[O-]	Pharmacologic Actions;Anti-Bacterial Agents;Anti-Infective Agents;Therapeutic Uses;Chemical Actions and Uses	loracarbef;Loracarbef hydrate;Loracarbefum;Lorabid;CHEBI:214480;AC1NR4Q4;CHEMBL1013;BIDD:GT0753;LY-163892;CHEBI:47544;LY 163892 monohydrate;KT 3777;(6R,7S)-7-[[(2R)-2-amino-2-phenylacetyl]amino]-3-chloro-8-oxo-1-azabicyclo[4.2.0]oct-2-ene-2-carboxylic acid;(6R,7S)-7-{[(2R)-2-amino-2-phenylacetyl]amino}-3-chloro-8-oxo-1-azabicyclo[4.2.0]oct-2-ene-2-carboxylic acid;I06-1267;7beta-[(2R)-2-amino-2-ph…	non-genotoxic agent;(6R,7S)-7-[[(2R)-2-azanyl-2-phenyl-ethanoyl]amino]-3-chloranyl-8-oxidanylidene-1-azabicyclo[4.2.0]oct-2-ene-2-carboxylic acid
41	Antibacterial	DB00456	6024	Cefalotin	Cephalosporin	Beta-lactam	Cell wall	InChI=1S/C16H16N2O6S2/c1-8(19)24-6-9-7-26-15-12(14(21)18(15)13(9)16(22)23)17-11(20)5-10-3-2-4-25-10/h2-4,12,15H,5-7H2,1H3,(H,17,20)(H,22,23)/t12-,15-/m1/s1	XIURVHNZVLADCM-IUODEOHRSA-N	(6R,7R)-3-(acetyloxymethyl)-8-oxo-7-[(2-thiophen-2-ylacetyl)amino]-5-thia-1-azabicyclo[4.2.0]oct-2-ene-2-carboxylic acid	C16H16N2O6S2	3	1	8	0	0	3	-0.74243	115.84	2	6	395.436	s1cccc1CC(=O)NC1C2SCC(COC(=O)C)=C(N2C1=O)C(=O)[O-]	Pharmacologic Actions;Anti-Bacterial Agents;Anti-Infective Agents;Chemical Actions and Uses;Therapeutic Uses	cephalothin;Cefalotin;Cefalothin;Cephalothinum;Cephalotin;Cemastin;Coaxin;Seffin;Averon-1;Cefalotinum;Cefalotina;Cefalotine;Cefalotine [INN-French];Cefalotinum [INN-Latin];Cefalotina [INN-Spanish];Keflin;CHEBI:124991;Cefalotin (BAN);7-(Thiophene-2-acetamido)cephalosporin;153-61-7;7-(2-Thienylacetamido)cephalosporanic acid;HSDB 3024;Cefalotina fabra (TN);Spectrum_000110;7-(Thiophene-2-acetamido)ce…	MLSMR_COMPOUND_CLASS: NP SS;Anti-Infective Agents;Cephalothin Acyl-Intermediate Structure Of Class A Beta- Lactamase Toho-1 E166aR274NR276N TRIPLE MUTANT;"Same as: <a href=""http://pubchem.ncbi.nlm.nih.gov/summary/summary.cgi?sid=51091939"">D07635</a>";Mechanism of action: The bactericidal activity of cefalotin results from the inhibition of cell wall synthesis via affinity for penicillin-binding…
42	Antibacterial	DB00493	5742673	Cefotaxime	Cephalosporin	Beta-lactam	Cell wall	InChI=1S/C16H17N5O7S2/c1-6(22)28-3-7-4-29-14-10(13(24)21(14)11(7)15(25)26)19-12(23)9(20-27-2)8-5-30-16(17)18-8/h5,10,14H,3-4H2,1-2H3,(H2,17,18)(H,19,23)(H,25,26)/b20-9-/t10-,14-/m1/s1	GPRBEKHLDVQUJE-QSWIMTSFSA-N	(6R,7R)-3-(acetyloxymethyl)-7-[[(2Z)-2-(2-amino-1,3-thiazol-4-yl)-2-methoxyiminoacetyl]amino]-8-oxo-5-thia-1-azabicyclo[4.2.0]oct-2-ene-2-carboxylic acid	C16H17N5O7S2	5	2	9	1	2	3	-1.9572	176.34	5	7	454.464	s1cc(nc1N)C(=NOC)C(=O)NC1C2SCC(COC(=O)C)=C(N2C1=O)C(=O)[O-]	Pharmacologic Actions;Therapeutic Uses;Anti-Bacterial Agents;Anti-Infective Agents;Chemical Actions and Uses	cefotaxime;Cefotaxime acid;Cefotaxima;Cefotaximum;Cephotaxime;Cefotaxime (INN);Cefotaxim Hikma (TN);CHEBI:204928;AC1NX3QV;Prestwick2_000139;Prestwick3_000139;Claforan (*Sodium salt*);Lopac0_000278;BSPBio_000218;Claforan;BPBio1_000240;HMS2090M11;AC-217;63527-52-6;C06885;D07647;Cephotaxim;Cefotaxim;Klaforan;BRD-K78364995-236-03-5;Spectrum_000108;CE3;Cefotaxime [INN:BAN];AC1L9UKL;AC1NSF5T;AC1NSF6T;A…	BIOMOL:DL-347;ATC code: J01DD01;(6R,7R)-3-(acetyloxymethyl)-7-[[(2Z)-2-(2-azanyl-1,3-thiazol-4-yl)-2-methoxyimino-ethanoyl]amino]-8-oxidanylidene-5-thia-1-azabicyclo[4.2.0]oct-2-ene-2-carboxylic acid;"Same as: <a href=""http://pubchem.ncbi.nlm.nih.gov/summary/summary.cgi?sid=51091951"">D07647</a>";PDB Accession Code 3HLW;Target: D-alanyl-D-alanine carboxypeptidase inhibitor;Ctx-M-9 S70g In Comple…
43	Antibacterial	DB00535	6915944	Cefdinir	Cephalosporin	Beta-lactam	Cell wall	InChI=1S/C14H13N5O5S2/c1-2-5-3-25-12-8(11(21)19(12)9(5)13(22)23)17-10(20)7(18-24)6-4-26-14(15)16-6/h2,4,8,12,24H,1,3H2,(H2,15,16)(H,17,20)(H,22,23)/b18-7-/t8-,12-/m1/s1	RTXOFQZKPXMALH-GHXIOONMSA-N	(6R,7R)-7-[[(2Z)-2-(2-amino-1,3-thiazol-4-yl)-2-hydroxyiminoacetyl]amino]-3-ethenyl-8-oxo-5-thia-1-azabicyclo[4.2.0]oct-2-ene-2-carboxylic acid	C14H13N5O5S2	5	3	6	0	1	3	-1.5065	161.04	5	5	394.412	s1cc(nc1N)C(=NO)C(=O)NC1C2SCC(C=C)=C(N2C1=O)C(=O)[O-]	Chemical Actions and Uses;Therapeutic Uses;Pharmacologic Actions;Anti-Bacterial Agents;Anti-Infective Agents	cefdinir;Omnicef;CFDN;Cefdinirum;Cefdinyl;Cefzon;CI-983;FK 482;FK-482;Cefdirnir;91832-40-5;Cefdinirum [INN-Latin];CI 983;Omnicef (TN);Cefzon (TN);CHEBI:3485;S1605_Selleck;PD-134393;Cefdinir [USAN:INN];AC1OCD3C;Spectrum5_001560;UNII-CI0FAO63WC;BMY 28488;CHEMBL927;BSPBio_002735;BIDD:GT0827;SPECTRUM1505208;PD 134393;C14H13N5O5S2;HMS1922L19;HMS2093K20;DB00535;KS-1038;NCGC00178499-01;FR-80482;LS-14998…	Reproductive Effect;"Same as: <a href=""http://pubchem.ncbi.nlm.nih.gov/summary/summary.cgi?sid=10310"">C08110</a>";MLSMR_SUPPLIER_STRUCTURE_ID: KS-1038;Microsource:1505208;Activity: Antibacterial;Indication: For the treatment of the respiratory, skin, soft tissue, and ENT infections caused by H. influenzae (including b-lactamase producing strains), H. parainfluenzae (including b-lactamase produc…
44	Antibacterial	DB00567	62921	Cephalexin	Cephalosporin	Beta-lactam	Cell wall	InChI=1S/C16H17N3O4S.H2O/c1-8-7-24-15-11(14(21)19(15)12(8)16(22)23)18-13(20)10(17)9-5-3-2-4-6-9;/h2-6,10-11,15H,7,17H2,1H3,(H,18,20)(H,22,23);1H2/t10-,11-,15-;/m1./s1	AVGYWQBCYZHHPN-CYJZLJNKSA-N	(6R,7R)-7-[[(2R)-2-amino-2-phenylacetyl]amino]-3-methyl-8-oxo-5-thia-1-azabicyclo[4.2.0]oct-2-ene-2-carboxylic acid hydrate	C16H19N3O5S	2	1	5	0	0	3	-1.5111	117.18	3	4	347.395	S1C2N(C(=O)C2NC(=O)C([NH3+])c2ccccc2)C(C(=O)[O-])=C(C1)C	Anti-Bacterial Agents;Anti-Infective Agents;Chemical Actions and Uses;Therapeutic Uses;Pharmacologic Actions	cephalexin;Cephalexin monohydrate;Aristosporin;Bactopenor;Cefalexgobens;Cefibacter;Cephalobene;Karilexina;Sintolexyn;Viosporine;Adcadina;Azabort;Cefacet;Cefalekey;Cefalival;Domucef;Doriman;Efemida;Loisine;Losporal;Maksipor;Medolexin;Prindex;Rilexine;Rogevil;Servicef;Theratrex;Zabytrex;Beliam;Noveol;Ambal;Cephalex von ct;cefalexin hydrate;Henina Oral;Cefalexina Richet;Cefalexin generics;Cefalexina…	Same as: <a href="http://pubchem.ncbi.nlm.nih.gov/summary/summary.cgi?sid=47205806">D00906</a>;Activity: Antibacterial;Prestwick:358;(6R,7R)-7-[[(2R)-2-azanyl-2-phenyl-ethanoyl]amino]-3-methyl-8-oxidanylidene-5-thia-1-azabicyclo[4.2.0]oct-2-ene-2-carboxylic acid hydrate;Transporter: SLC15A1, SCL15A2;Target: D-alanyl-D-alanine carboxypeptidase inhibitor;"Same as: <a href=""http://pubchem.ncbi.nlm.…
45	Antibacterial	DB00671	5362065	Cefixime	Cephalosporin	Beta-lactam	Cell wall	InChI=1S/C16H15N5O7S2/c1-2-6-4-29-14-10(13(25)21(14)11(6)15(26)27)19-12(24)9(20-28-3-8(22)23)7-5-30-16(17)18-7/h2,5,10,14H,1,3-4H2,(H2,17,18)(H,19,24)(H,22,23)(H,26,27)/b20-9-/t10-,14-/m1/s1	OKBVVJOGVLARMR-QSWIMTSFSA-N	(6R,7R)-7-[[(2Z)-2-(2-amino-1,3-thiazol-4-yl)-2-(carboxymethoxyimino)acetyl]amino]-3-ethenyl-8-oxo-5-thia-1-azabicyclo[4.2.0]oct-2-ene-2-carboxylic acid	C16H15N5O7S2	4	2	9	1	2	3	-3.2142	190.17	5	7	451.44	s1cc(nc1N)C(=NOCC(=O)[O-])C(=O)NC1C2SCC(C=C)=C(N2C1=O)C(=O)[O-]	Chemical Actions and Uses;Anti-Infective Agents;Therapeutic Uses;Anti-Bacterial Agents;Pharmacologic Actions	CEFIXIME;Necopen;Denvar;Tricef;Suprax (TN);CFIX;AC1NSFNI;Prestwick3_000462;FK-027;CHEMBL1541;BSPBio_000564;Cefixima;Cefiximum;FR-17027;CL-284635;MLS002222332;BPBio1_000622;CHEBI:472657;CHEBI:530642;MolPort-003-845-687;AC-4350;NCGC00179521-01;SMR001307271;LS-187248;AB00513842;79350-37-1;C06881;D00258;BRD-K71059170-001-02-5;(6R,7R)-7-({(2Z)-2-(2-amino-1,3-thiazol-4-yl)-2-[(carboxymethoxy)imino]acet…	Same as: <a href="http://pubchem.ncbi.nlm.nih.gov/summary/summary.cgi?sid=9098">C06881</a>;Prestwick Chemical, Inc.:Prestw-462;MLSMR_COMPOUND_CLASS: NP SS;Target: D-alanyl-D-alanine carboxypeptidase inhibitor;Structure Shown: tested chemical;Activity: Antibacterial;MLSMR_SAMPLE_SUPPLIER: Prestwick Chemical, Inc.;BIOA;"For further information visit the FDA Maximum Recommended Therapeutic Dose Data…
46	Antibacterial	DB00689	19150	Cephaloglycin	Cephalosporin	Beta-lactam	Cell wall	InChI=1S/C18H19N3O6S/c1-9(22)27-7-11-8-28-17-13(16(24)21(17)14(11)18(25)26)20-15(23)12(19)10-5-3-2-4-6-10/h2-6,12-13,17H,7-8,19H2,1H3,(H,20,23)(H,25,26)/t12-,13-,17-/m1/s1	FUBBGQLTSCSAON-PBFPGSCMSA-N	(6R,7R)-3-(acetyloxymethyl)-7-[[(2R)-2-amino-2-phenylacetyl]amino]-8-oxo-5-thia-1-azabicyclo[4.2.0]oct-2-ene-2-carboxylic acid	C18H19N3O6S	3	1	8	0	1	3	-1.9679	143.48	3	6	405.431	S1C2N(C(=O)C2NC(=O)C([NH3+])c2ccccc2)C(C(=O)[O-])=C(C1)COC(=O)C	Anti-Bacterial Agents;Anti-Infective Agents;Chemical Actions and Uses;Pharmacologic Actions;Therapeutic Uses	Cefaloglycin;Cephaloglycine;D-Cephaloglycine;Cephaoglycin acid;CEPHALOGLYCIN;Cephaloglycin anhydrous;Cefaloglicina;Cefaloglycine;Cefaloglycinum;Kefglycin;Kafocin;D-(-)-Cephaloglycin;Cefaloglycine [INN-French];Cefaloglycinum [INN-Latin];Cefaloglicina [INN-Spanish];Lilly 39435;Cefaloglycin (JAN);Cephaloglycin anhdyous;CHEBI:34613;7-(D-alpha-Aminophenyl-acetamido)cephalosporanic acid;HSDB 3214;7-(2-…	Same as: <a href="http://pubchem.ncbi.nlm.nih.gov/summary/summary.cgi?sid=7849011">D01949</a>;"For further information visit the FDA Maximum Recommended Therapeutic Dose Database <a href=""http://www.fda.gov/AboutFDA/CentersOffices/CDER/ucm092199.htm""target=""_blank"">Website</a>";"Substance included in EPA DSSTox FDAMDD: FDA Maximum (Recommended) Daily Dose Database File <a href=""http://www.ep…
47	Antibacterial	DB00833	51039	Cefaclor	Cephalosporin	Beta-lactam	Cell wall	InChI=1S/C15H14ClN3O4S/c16-8-6-24-14-10(13(21)19(14)11(8)15(22)23)18-12(20)9(17)7-4-2-1-3-5-7/h1-5,9-10,14H,6,17H2,(H,18,20)(H,22,23)/t9-,10-,14-/m1/s1	QYIYFLOTGYLRGG-GPCCPHFNSA-N	(6R,7R)-7-[[(2R)-2-amino-2-phenylacetyl]amino]-3-chloro-8-oxo-5-thia-1-azabicyclo[4.2.0]oct-2-ene-2-carboxylic acid	C15H14ClN3O4S	2	1	5	0	0	3	-1.3347	117.18	3	4	367.813	ClC=1CSC2N(C(=O)C2NC(=O)C([NH3+])c2ccccc2)C=1C(=O)[O-]	Pharmacologic Actions;Chemical Actions and Uses;Therapeutic Uses;Anti-Bacterial Agents;Anti-Infective Agents	cefaclor;Ceclor;Cephaclor;Kefral;Cefaclorum;Raniclor;Lilly 99638;Panoral;CHEBI:3478;S 6472;Cefaclor hydrate;Ceclor CD;ST057228;53994-73-3;Dystaclor MR;L-Kefral;Alenfral (TN);S1499_Selleck;Spectrum_001070;(6R,7R)-7-{[(2R)-2-amino-2-phenylacetyl]amino}-3-chloro-8-oxo-5-thia-1-azabicyclo[4.2.0]oct-2-ene-2-carboxylic acid;SpecPlus_000947;AC1L1ABP;Prestwick0_000485;Prestwick0_001102;Prestwick1_000485;…	.Beta.-Lactams;Human Data;NIAID ChemDB HIV, Opportunistic Infections and Tuberculosis Therapeutics Database;http://mlsmr.evotec.com/MLSMR_HomePage/pdf/pubchem_reference.pdf;Reproductive Effect;NINDS:1500771;MLSMR_SUPPLIER_STRUCTURE_ID: C6895;OR MONOHYDRATE;ATC code: J01DC04;FDA_Orange_Book;MLSMR_SUPPLIER_STRUCTURE_ID: C6895;(6R,7R)-7-[[(2R)-2-azanyl-2-phenyl-ethanoyl]amino]-3-chloranyl-8-oxidanyl…
48	Antibacterial	DB00923	43507	Ceforanide	Cephalosporin	Beta-lactam	Cell wall	InChI=1S/C20H21N7O6S2/c21-6-11-4-2-1-3-10(11)5-13(28)22-15-17(31)27-16(19(32)33)12(8-34-18(15)27)9-35-20-23-24-25-26(20)7-14(29)30/h1-4,15,18H,5-9,21H2,(H,22,28)(H,29,30)(H,32,33)/t15-,18-/m1/s1	SLAYUXIURFNXPG-CRAIPNDOSA-N	(6R,7R)-7-[[2-[2-(aminomethyl)phenyl]acetyl]amino]-3-[[1-(carboxymethyl)tetrazol-5-yl]sulfanylmethyl]-8-oxo-5-thia-1-azabicyclo[4.2.0]oct-2-ene-2-carboxylic acid	C20H21N7O6S2	5	1	11	2	3	4	-3.56363	200.91	7	6	518.555	S1C2N(C(=O)C2NC(=O)Cc2ccccc2C[NH3+])C(C(=O)[O-])=C(C1)CSc1nnnn1CC(=O)[O-]	Chemical Actions and Uses;Anti-Bacterial Agents;Pharmacologic Actions;Anti-Infective Agents;Therapeutic Uses	CEFORANIDE;Precef;Ceforanido;Ceforanidum;Ceforanidum [INN-Latin];Ceforanido [INN-Spanish];Radacef;bl s786;Precef (TN);CHEBI:3495;60925-61-3;BL-S786;Ceforanide (USP/INN);AC1Q6LON;Prestwick0_000470;Prestwick1_000470;Prestwick2_000470;Prestwick3_000470;AC1L2A0U;BSPBio_000580;Ceforanide [USAN:INN:BAN];SPBio_002519;UNII-8M1YF8951V;BPBio1_000638;CHEMBL1201046;C20H21N7O6S2;HMS1569M22;BL-S 786;DB00923;LS…	Tetrazoles;Prestwick:470;Structure Shown: tested chemical;Activity: Antibacterial;"Same as: <a href=""http://pubchem.ncbi.nlm.nih.gov/summary/summary.cgi?sid=7847325"">D00259</a>";Indication: For the treatment of infections caused by susceptible organisms.;Anti-Bacterial Agents;Anti-Infective Agents;Mechanism of action: The bactericidal activity of ceforanide results from the inhibition of cell w…
49	Antibacterial	DB01066	6437877	Cefditoren	Cephalosporin	Beta-lactam	Cell wall	InChI=1S/C25H28N6O7S3/c1-12-15(41-10-27-12)7-6-13-8-39-21-17(29-19(32)16(30-36-5)14-9-40-24(26)28-14)20(33)31(21)18(13)22(34)37-11-38-23(35)25(2,3)4/h6-7,9-10,17,21H,8,11H2,1-5H3,(H2,26,28)(H,29,32)/b7-6-,30-16-/t17-,21-/m1/s1	AFZFFLVORLEPPO-UVYJNCLZSA-N	2,2-dimethylpropanoyloxymethyl (6R,7R)-7-[[(2Z)-2-(2-amino-1,3-thiazol-4-yl)-2-methoxyiminoacetyl]amino]-3-[(Z)-2-(4-methyl-1,3-thiazol-5-yl)ethenyl]-8-oxo-5-thia-1-azabicyclo[4.2.0]oct-2-ene-2-carboxylate	C25H28N6O7S3	7	2	13	2	2	4	2.29812	175.4	6	7	620.732	s1cnc(C)c1C=CC=1CSC2N(C(=O)C2NC(=O)C(=NOC)c2nc(sc2)N)C=1C(OCOC(=O)C(C)(C)C)=O	Anti-Infective Agents;Chemical Actions and Uses;Therapeutic Uses;Anti-Bacterial Agents;Pharmacologic Actions	Spectracef;cefditoren pivoxil;CDTR-PI;Meiact;Cefditoren pivaloyloxymethyl ester;ME-1207;CHEBI:560555;Spectracef , Meiact, Cefditoren pivoxil;Cefditoren Pivoxil [JAN];CCRIS 7768;Spectracef (TN);117467-28-4;Meiact (TN);Cefditoren (pivoxil);S1768_Selleck;AC1O5OKO;Cefditoren pivoxil (JP16);C25H28N6O7S3;5-Thia-1-azabicyclo(4.2.0)oct-2-ene-2-carboxylic acid, 7-(((2-amino-4-thiazolyl)(methoxyimino)acety…	2,2-dimethylpropanoyloxymethyl (6R,7R)-7-[[(2Z)-2-(2-azanyl-1,3-thiazol-4-yl)-2-methoxyimino-ethanoyl]amino]-3-[(Z)-2-(4-methyl-1,3-thiazol-5-yl)ethenyl]-8-oxidanylidene-5-thia-1-azabicyclo[4.2.0]oct-2-ene-2-carboxylate;Activity: Antibiotic, cephalosporin;ATC code: J01DD16;Cefditoren pivoxil is used to treat uncomplicated skin and skin structure infections, etc.;Groups: approved;Indication: For t…
50	Antibacterial	DB01112	5479529	Cefuroxime	Cephalosporin	Beta-lactam	Cell wall	InChI=1S/C16H16N4O8S/c1-26-19-9(8-3-2-4-27-8)12(21)18-10-13(22)20-11(15(23)24)7(5-28-16(17)25)6-29-14(10)20/h2-4,10,14H,5-6H2,1H3,(H2,17,25)(H,18,21)(H,23,24)/b19-9-/t10-,14-/m1/s1	JFPVXVDWJQMJEE-IZRZKJBUSA-N	(6R,7R)-3-(carbamoyloxymethyl)-7-[[(2Z)-2-(furan-2-yl)-2-methoxyiminoacetyl]amino]-8-oxo-5-thia-1-azabicyclo[4.2.0]oct-2-ene-2-carboxylic acid	C16H16N4O8S	4	2	9	1	1	3	-1.8707	176.59	4	8	423.382	S1C2N(C(=O)C2NC(=O)C(=NOC)c2occc2)C(C(=O)[O-])=C(C1)COC(=O)N	Chemical Actions and Uses;Anti-Infective Agents;Therapeutic Uses;Anti-Bacterial Agents;Pharmacologic Actions	cefuroxime;Cephuroxime;Cefuroxim;Cefuroximo;Cefuroximum;Sharox;Zinacef Danmark;Biofuroksym;Cefuril;Cefuroximum [INN-Latin];Cefuroximo [INN-Spanish];Cefuroxime (TN);55268-75-2;Zinacef;Ketocef;AC1NUIFB;Cefuroxime (USAN/INN);Prestwick3_000720;EINECS 259-560-1;UNII-O1R9FJ93ED;AC1Q41FS;BRN 5783190;BSPBio_000939;BIDD:GT0619;Cefuroxime [USAN:INN:BAN];CHEBI:3515;BPBio1_001033;C16H16N4O8S;MolPort-005-938-…	Peptidoglycan Synthesis;non-genotoxic agent;TYPES: Compounds;Drug / Therapeutic Agent;Penicillin-Binding Protein 2x (Pbp-2x) Acyl-Enzyme Complex Peptidoglycan Synthesis, Resistance, Cell Wall, Transmembrane Mol_id: 1; Molecule: Penicillin-Binding Protein 2x; Chain: A; Engineered: Yes; Other_details: Complexed With Cefuroxime Antibiotic;BIOA;Anti-Infective Agents;Activity: Antibacterial;"Same as: …
51	Antibacterial	DB01139	30699	Cephapirin	Cephalosporin	Beta-lactam	Cell wall	InChI=1S/C17H17N3O6S2/c1-9(21)26-6-10-7-28-16-13(15(23)20(16)14(10)17(24)25)19-12(22)8-27-11-2-4-18-5-3-11/h2-5,13,16H,6-8H2,1H3,(H,19,22)(H,24,25)/t13-,16-/m1/s1	UQLLWWBDSUHNEB-CZUORRHYSA-N	(6R,7R)-3-(acetyloxymethyl)-8-oxo-7-[(2-pyridin-4-ylsulfanylacetyl)amino]-5-thia-1-azabicyclo[4.2.0]oct-2-ene-2-carboxylic acid	C17H17N3O6S2	4	1	9	0	1	3	-0.8593	128.73	3	6	422.462	S1C2N(C(=O)C2NC(=O)CSc2ccncc2)C(C(=O)[O-])=C(C1)COC(=O)C	cephapirin;Cefapirin;Cephapirine;Cefaprin;Cefapirinum;Cefapirina;Cefapirine;Cefaprin sodium;Cefa;Cefapirine [INN-French];Cefapirinum [INN-Latin];Cefapirina [INN-Spanish];CEPR;CHEBI:554446;Cefa -ak;Metricure (TN);Cefapirin (BAN);Cefadyl;HSDB 3215;Spectrum_000112;Cefapirin [INN:BAN];AC1Q6LOX;Prestwick0_000851;Prestwick1_000851;Prestwick2_000851;Spectrum2_000103;Spectrum3_000333;Spectrum4_000270;Spe…	Antibiotics;"Same as: <a href=""http://pubchem.ncbi.nlm.nih.gov/summary/summary.cgi?sid=51091940"">D07636</a>";Anti-Bacterial Agents;Anti-Infective Agents;"Substance included in EPA DSSTox FDAMDD: FDA Maximum (Recommended) Daily Dose Database File <a href=""http://www.epa.gov/ncct/dsstox/sdf_fdamdd.html""target=""_blank"">[link to DSSTox SDF Download Page]</a>";"For further information visit the …	Anti-Bacterial Agents;Anti-Infective Agents;Chemical Actions and Uses;Therapeutic Uses;Pharmacologic Actions
52	Antibacterial	DB01140	47965	Cefadroxil	Cephalosporin	Beta-lactam	Cell wall	InChI=1S/C16H17N3O5S/c1-7-6-25-15-11(14(22)19(15)12(7)16(23)24)18-13(21)10(17)8-2-4-9(20)5-3-8/h2-5,10-11,15,20H,6,17H2,1H3,(H,18,21)(H,23,24)/t10-,11-,15-/m1/s1	BOEGTKLJZSQCCD-UEKVPHQBSA-N	(6R,7R)-7-[[(2R)-2-amino-2-(4-hydroxyphenyl)acetyl]amino]-3-methyl-8-oxo-5-thia-1-azabicyclo[4.2.0]oct-2-ene-2-carboxylic acid	C16H17N3O5S	3	2	5	0	0	3	-1.8055	137.41	3	5	363.394	S1C2N(C(=O)C2NC(=O)C([NH3+])c2ccc(O)cc2)C(C(=O)[O-])=C(C1)C	Anti-Bacterial Agents;Pharmacologic Actions;Chemical Actions and Uses;Therapeutic Uses;Anti-Infective Agents	cefadroxil;Cefadroxilo;Cefadroxilum;CHEBI:3479;Cephadroxil;D-Cefadroxil;(6R,7R)-7-{[(2R)-2-amino-2-(4-hydroxyphenyl)acetyl]amino}-3-methyl-8-oxo-5-thia-1-azabicyclo[4.2.0]oct-2-ene-2-carboxylic acid;Ultracef;BL-S578;Sumacef (TN);Duricef;Spectrum_000104;Prestwick0_000434;Prestwick1_000434;Prestwick2_000434;Prestwick3_000434;Spectrum2_000087;Spectrum4_000266;Spectrum5_000663;UNII-Q525PA8JJB;AC1L2J3…	Transporter: SLC15A1, SCL15A2;79;FDA_Orange_Book_Extended;"Substance included in EPA DSSTox FDAMDD: FDA Maximum (Recommended) Daily Dose Database File <a href=""http://www.epa.gov/ncct/dsstox/sdf_fdamdd.html""target=""_blank"">[link to DSSTox SDF Download Page]</a>";"For further information visit the FDA Maximum Recommended Therapeutic Dose Database <a href=""http://www.fda.gov/AboutFDA/CentersOf…
53	Antibacterial	DB01150	5281006	Cefprozil	Cephalosporin	Beta-lactam	Cell wall	InChI=1S/C18H19N3O5S/c1-2-3-10-8-27-17-13(16(24)21(17)14(10)18(25)26)20-15(23)12(19)9-4-6-11(22)7-5-9/h2-7,12-13,17,22H,8,19H2,1H3,(H,20,23)(H,25,26)/b3-2+/t12-,13-,17-/m1/s1	WDLWHQDACQUCJR-ZAMMOSSLSA-N	(6R,7R)-7-[[(2R)-2-amino-2-(4-hydroxyphenyl)acetyl]amino]-8-oxo-3-[(E)-prop-1-enyl]-5-thia-1-azabicyclo[4.2.0]oct-2-ene-2-carboxylic acid	C18H19N3O5S	3	2	6	0	0	3	-1.2493	137.41	3	5	389.432	S1C2N(C(=O)C2NC(=O)C([NH3+])c2ccc(O)cc2)C(C(=O)[O-])=C(C1)C=CC	Chemical Actions and Uses;Therapeutic Uses;Anti-Bacterial Agents;Pharmacologic Actions;Anti-Infective Agents	cefprozil;Cefprozil anhydrous;Brisoral;Cefprozilo;Cefprozilum;Cronocef;Arzimol;Procef;Serozil;Cefprozilum [INN-Latin];Cefprozilo [INN-Spanish];Cefprozil (TN);Cefprozil (INN);Cefzil;Cefzil (TN);AC1NQXVS;BMY 28100;92665-29-7;BIDD:GT0833;UNII-1M698F4H4E;CHEBI:3506;CHEMBL276568;DB01150;NCGC00159513-02;LS-149959;C06888;D07651;5-Thia-1-azabicyclo(4.2.0)oct-2-ene-2-carboxylic acid, 7-(((2R)-amino(4-hydr…	Target: D-alanyl-D-alanine carboxypeptidase inhibitor;Groups: approved;"Same as: <a href=""http://pubchem.ncbi.nlm.nih.gov/summary/summary.cgi?sid=9105"">C06888</a>";"Same as: <a href=""http://pubchem.ncbi.nlm.nih.gov/summary/summary.cgi?sid=51091955"">D07651</a>";Anti-Bacterial Agents;Drug / Therapeutic Agent;Mechanism of action: Cefprozil, like the penicillins, is a beta-lactam antibiotic. By b…
54	Antibacterial	DB01212	5479530	Ceftriaxone	Cephalosporin	Beta-lactam	Cell wall	InChI=1S/C18H18N8O7S3/c1-25-18(22-12(28)13(29)23-25)36-4-6-3-34-15-9(14(30)26(15)10(6)16(31)32)21-11(27)8(24-33-2)7-5-35-17(19)20-7/h5,9,15H,3-4H2,1-2H3,(H2,19,20)(H,21,27)(H,23,29)(H,31,32)/b24-8-/t9-,15-/m1/s1	VAAUVRVFOQPIGI-SPQHTLEESA-N	(6R,7R)-7-[[(2Z)-2-(2-amino-1,3-thiazol-4-yl)-2-methoxyiminoacetyl]amino]-3-[(2-methyl-5,6-dioxo-1H-1,2,4-triazin-3-yl)sulfanylmethyl]-8-oxo-5-thia-1-azabicyclo[4.2.0]oct-2-ene-2-carboxylic acid	C18H18N8O7S3	7	3	9	2	2	4	-2.9279	211.81	8	7	553.581	s1cc(nc1N)C(=NOC)C(=O)NC1C2SCC(CSC3=NC(=O)C(=O)NN3C)=C(N2C1=O)C(=O)[O-]	Therapeutic Uses;Chemical Actions and Uses;Anti-Bacterial Agents;Anti-Infective Agents;Pharmacologic Actions	ceftriaxone;Biotrakson;Rocephin;Cefatriaxone;Ceftriaxona;Ceftriaxonum;Ceftriazone;Rocephine;Ceftriaxonum [INN-Latin];Ceftriaxona [INN-Spanish];Ceftriaxon;Longacef;Rocefin;CHEBI:29007;Ceftriaxone (TN);Longaceph;Ceftriaxone (INN);CTRX;CEFTRIAXONE SODIUM;Ceftriaxone intravenous;AC1NUIFE;DRG-0071;EINECS 277-405-6;Ceftriaxone [USAN:JAN];Ceftriaxone, Disodium Salt;CHEMBL161;Ro 139904;C18H18N8O7S3;UNII-…	Same as: <a href="http://pubchem.ncbi.nlm.nih.gov/summary/summary.cgi?sid=51091963">D07659</a>;NIAID ChemDB HIV, Opportunistic Infections and Tuberculosis Therapeutics Database;Groups: approved;Activity: Antibiotic, cephalosporin;"For further information visit the FDA Maximum Recommended Therapeutic Dose Database <a href=""http://www.fda.gov/AboutFDA/CentersOffices/CDER/ucm092199.htm""target=""_b…
55	Antibacterial	DB01326	456255	Cefamandole	Cephalosporin	Beta-lactam	Cell wall	InChI=1S/C18H18N6O5S2/c1-23-18(20-21-22-23)31-8-10-7-30-16-11(15(27)24(16)12(10)17(28)29)19-14(26)13(25)9-5-3-2-4-6-9/h2-6,11,13,16,25H,7-8H2,1H3,(H,19,26)(H,28,29)/t11-,13-,16-/m1/s1	OLVCFLKTBJRLHI-AXAPSJFSSA-N	(6R,7R)-7-[[(2R)-2-hydroxy-2-phenylacetyl]amino]-3-[(1-methyltetrazol-5-yl)sulfanylmethyl]-8-oxo-5-thia-1-azabicyclo[4.2.0]oct-2-ene-2-carboxylic acid	C18H18N6O5S2	6	2	8	1	2	4	-1.1056	153.37	6	5	461.503	S1C2N(C(=O)C2NC(=O)C(O)c2ccccc2)C(C(=O)[O-])=C(C1)CSc1nnnn1C	Chemical Actions and Uses;Anti-Bacterial Agents;Pharmacologic Actions;Anti-Infective Agents;Therapeutic Uses	cefamandole;Cefadole;Cefamandolum;Cefamandol;Cephadole;CEPHAMANDOLE;L-Cefamandole;CHEBI:3480;34444-01-4;AC1L9UKI;Prestwick0_000747;Prestwick1_000747;Prestwick2_000747;Prestwick3_000747;Cefamandole (USAN/INN);CHEMBL1146;BSPBio_000734;SPBio_002673;BPBio1_000808;CPD0-2066;AC-1294;DB01326;Compound 83405;C06879;D02344;Kefamandol;(6R,7R)-7-[[(2R)-2-hydroxy-2-phenylacetyl]amino]-3-[(1-methyltetrazol-5-y…	For further information visit the FDA Maximum Recommended Therapeutic Dose Database <a href="http://www.fda.gov/AboutFDA/CentersOffices/CDER/ucm092199.htm"target="_blank">Website</a>;Depositor-supplied synonyms are taken from MeSH (Medical Subject Headings).;Mechanism of action: Like all beta-lactam antibiotics, cefamandole binds to specific penicillin-binding proteins (PBPs) located inside the b…
56	Antibacterial	DB01327	33255	Cefazolin	Cephalosporin	Beta-lactam	Cell wall	InChI=1S/C14H14N8O4S3/c1-6-17-18-14(29-6)28-4-7-3-27-12-9(11(24)22(12)10(7)13(25)26)16-8(23)2-21-5-15-19-20-21/h5,9,12H,2-4H2,1H3,(H,16,23)(H,25,26)/t9-,12-/m1/s1	MLYYVTUWGNIJIB-BXKDBHETSA-N	(6R,7R)-3-[(5-methyl-1,3,4-thiadiazol-2-yl)sulfanylmethyl]-8-oxo-7-[[2-(tetrazol-1-yl)acetyl]amino]-5-thia-1-azabicyclo[4.2.0]oct-2-ene-2-carboxylic acid	C14H14N8O4S3	7	1	8	1	2	4	-1.70438	158.92	8	4	453.508	s1c(nnc1SCC=1CSC2N(C(=O)C2NC(=O)Cn2nnnc2)C=1C(=O)[O-])C	Therapeutic Uses;Chemical Actions and Uses;Pharmacologic Actions;Anti-Bacterial Agents;Anti-Infective Agents	cefazolin;Cefazoline;Cephamezine;Cephazolin;Cephazolidin;Cefamezin;Cephazoline;Cefazolinum;Cefazolina;Elzogram;Ancef;25953-19-9;Cefazoline [INN-French];Cefazolinum [INN-Latin];Cefazolina [INN-Spanish];CEZ;HSDB 3213;EINECS 247-362-8;Totacef;Kefzol;BRN 4169371;Cefazina;Firmacef;Liviclina;Atirin;(6R-trans)-3-(((5-Methyl-1,3,4-thiadiazol-2-yl)thio)methyl)-8-oxo-7-(((1H-tetrazol-1-yl)acetyl)-amino)-5-…	Anti-Bacterial Agents;SODIUM SALT;Drug / Therapeutic Agent;Anti-Infective Agents;MLSMR_COMPOUND_CLASS: NP SS;MLSMR_SAMPLE_SUPPLIER: InterBioScreen;Natural Products, Unspecified Origin;"Same as: <a href=""http://pubchem.ncbi.nlm.nih.gov/summary/summary.cgi?sid=9097"">C06880</a>";MLSMR_SUPPLIER_STRUCTURE_ID: STOCK1N-00790;.Beta.-Lactams;FDA_Orange_Book_Extended;ClinicalTrials_gov;Target: D-alanyl-D…
57	Antibacterial	DB01328	43594	Cefonicid	Cephalosporin	Beta-lactam	Cell wall	InChI=1S/C18H18N6O8S3/c25-13(9-4-2-1-3-5-9)14(26)19-11-15(27)24-12(17(28)29)10(6-33-16(11)24)7-34-18-20-21-22-23(18)8-35(30,31)32/h1-5,11,13,16,25H,6-8H2,(H,19,26)(H,28,29)(H,30,31,32)/t11-,13-,16-/m1/s1	DYAIAHUQIPBDIP-AXAPSJFSSA-N	(6R,7R)-7-[[(2R)-2-hydroxy-2-phenylacetyl]amino]-8-oxo-3-[[1-(sulfomethyl)tetrazol-5-yl]sulfanylmethyl]-5-thia-1-azabicyclo[4.2.0]oct-2-ene-2-carboxylic acid	C18H18N6O8S3	6	2	10	2	2	4	-2.2327	204.58	6	8	540.558	S1C2N(C(=O)C2NC(=O)C(O)c2ccccc2)C(C(=O)[O-])=C(C1)CSc1nnnn1CS(=O)(=O)[O-]	CEFONICID;Cefonicido;Cefonicidum;CHEBI:3491;Cefonicid (INN);Monocef (TN);61270-58-4;AC1Q6LOE;AC1L2A7C;CHEMBL1601;BIDD:GT0667;LS-187318;C06882;D07644;(6R,7R)-7-[[(2R)-2-hydroxy-2-phenylacetyl]amino]-8-oxo-3-[[1-(sulfomethyl)tetrazol-5-yl]sulfanylmethyl]-5-thia-1-azabicyclo[4.2.0]oct-2-ene-2-carboxylic acid;(6R,7R)-7-{[(2R)-2-hydroxy-2-phenylacetyl]amino}-8-oxo-3-({[1-(sulfomethyl)-1H-tetrazol-5-yl…	Same as: <a href="http://pubchem.ncbi.nlm.nih.gov/summary/summary.cgi?sid=9099">C06882</a>;"Substance included in EPA DSSTox FDAMDD: FDA Maximum (Recommended) Daily Dose Database File <a href=""http://www.epa.gov/ncct/dsstox/sdf_fdamdd.html""target=""_blank"">[link to DSSTox SDF Download Page]</a>";Activity: Antibiotic, cephalosporin;"For further information visit the FDA Maximum Recommended Ther…	Chemical Actions and Uses;Therapeutic Uses;Anti-Infective Agents;Anti-Bacterial Agents;Pharmacologic Actions
58	Antibacterial	DB01329	44185	Cefoperazone	Cephalosporin	Beta-lactam	Cell wall	InChI=1S/C25H27N9O8S2/c1-3-32-8-9-33(21(39)20(32)38)24(42)27-15(12-4-6-14(35)7-5-12)18(36)26-16-19(37)34-17(23(40)41)13(10-43-22(16)34)11-44-25-28-29-30-31(25)2/h4-7,15-16,22,35H,3,8-11H2,1-2H3,(H,26,36)(H,27,42)(H,40,41)/t15?,16-,22-/m1/s1	GCFBRXLSHGKWDP-WTKTZPJXSA-N	(6R,7R)-7-[[2-[(4-ethyl-2,3-dioxopiperazine-1-carbonyl)amino]-2-(4-hydroxyphenyl)acetyl]amino]-3-[(1-methyltetrazol-5-yl)sulfanylmethyl]-8-oxo-5-thia-1-azabicyclo[4.2.0]oct-2-ene-2-carboxylic acid	C25H27N9O8S2	9	3	12	2	3	5	-1.992	223.09	9	8	644.67	S1C2N(C(=O)C2NC(=O)C(NC(=O)N2CCN(CC)C(=O)C2=O)c2ccc(O)cc2)C(C(=O)[O-])=C(C1)CSc1nnnn1C	Therapeutic Uses;Anti-Bacterial Agents;Anti-Infective Agents;Chemical Actions and Uses;Pharmacologic Actions	Cefobid;cefoperazone;Cefoperazon;Cefoperazonum [INN-Latin];Cefoperazono [INN-Spanish];AC1L2BAU;Cefoperazone [INN:BAN];Cefoperazono;Cefoperazonum;Cefoperazone sodium salt;CHEBI:3493;C25H27N9O8S2;Cefobid (TN);EINECS 263-749-4;DB01329;BRN 0603333;CP 52640;LS-150056;LS-187731;(6R,7R)-7-((R)-2-(4-Ethyl-2,3-dioxo-1-piperazinylcarboxamido)-2-(4-hydroxyphenyl)acetamido)-3-((1-methyl-1H-tetrazol-5-yl)thio…	NIAID ChemDB HIV, Opportunistic Infections and Tuberculosis Therapeutics Database;Indication: For the treatment of bacterial infections caused by susceptible microorganisms.;Mechanism of action: Like all beta-lactam antibiotics, cefoperazone binds to specific penicillin-binding proteins (PBPs) located inside the bacterial cell wall, causing the inhibition of the third and last stage of bacterial …
59	Antibacterial	DB01330	53025	Cefotetan	Cephalosporin	Beta-lactam	Cell wall	InChI=1S/C17H17N7O8S4/c1-23-16(20-21-22-23)34-4-5-3-33-15-17(32-2,14(31)24(15)7(5)11(29)30)19-9(26)13-35-12(36-13)6(8(18)25)10(27)28/h13,15H,3-4H2,1-2H3,(H2,18,25)(H,19,26)(H,27,28)(H,29,30)/t13?,15-,17+/m1/s1	SRZNHPXWXCNNDU-RHBCBLIFSA-N	(6R,7S)-7-[[4-(2-amino-1-carboxy-2-oxoethylidene)-1,3-dithietane-2-carbonyl]amino]-7-methoxy-3-[(1-methyltetrazol-5-yl)sulfanylmethyl]-8-oxo-5-thia-1-azabicyclo[4.2.0]oct-2-ene-2-carboxylic acid	C17H17N7O8S4	7	2	10	2	3	4	-3.7077	225.59	7	8	573.612	S1C(SC1=C(C(=O)N)C(=O)[O-])C(=O)NC1(OC)C2SCC(CSc3nnnn3C)=C(N2C1=O)C(=O)[O-]	cefotetan;Cefotetanum;CHEBI:3499;69712-56-7;(6R,7S)-7-({[4-(2-amino-1-carboxy-2-oxoethylidene)-1,3-dithietan-2-yl]carbonyl}amino)-7-methoxy-3-{[(1-methyl-1H-tetrazol-5-yl)sulfanyl]methyl}-8-oxo-5-thia-1-azabicyclo[4.2.0]oct-2-ene-2-carboxylic acid;ICI-156834;Prestwick0_000473;Prestwick1_000473;Prestwick2_000473;Prestwick3_000473;BSPBio_000606;MLS002153829;SPBio_002545;Cefotetan (JP16/USP/INN);AC1…	Prestwick:473;(6R,7S)-7-[[4-[1-azanyl-3-oxidanyl-1,3-bis(oxidanylidene)propan-2-ylidene]-1,3-dithietan-2-yl]carbonylamino]-7-methoxy-3-[(1-methyl-1,2,3,4-tetrazol-5-yl)sulfanylmethyl]-8-oxidanylidene-5-thia-1-azabicyclo[4.2.0]oct-2-ene-2-carboxylic acid;Structure Shown: tested chemical;ATC code: J01DC05;"Substance included in EPA DSSTox FDAMDD: FDA Maximum (Recommended) Daily Dose Database File <…	Anti-Infective Agents;Therapeutic Uses;Chemical Actions and Uses;Anti-Bacterial Agents;Pharmacologic Actions
60	Antibacterial	DB01331	441199	Cefoxitin	Cephalosporin	Beta-lactam	Cell wall	InChI=1S/C16H17N3O7S2/c1-25-16(18-10(20)5-9-3-2-4-27-9)13(23)19-11(12(21)22)8(6-26-15(17)24)7-28-14(16)19/h2-4,14H,5-7H2,1H3,(H2,17,24)(H,18,20)(H,21,22)/t14-,16+/m1/s1	WZOZEZRFJCJXNZ-ZBFHGGJFSA-N	(6R,7S)-3-(carbamoyloxymethyl)-7-methoxy-8-oxo-7-[(2-thiophen-2-ylacetyl)amino]-5-thia-1-azabicyclo[4.2.0]oct-2-ene-2-carboxylic acid	C16H17N3O7S2	4	2	9	0	1	3	-1.23613	151.09	3	7	426.45	s1cccc1CC(=O)NC1(OC)C2SCC(COC(=O)N)=C(N2C1=O)C(=O)[O-]	cefoxitin;Mefoxin;Mefoxitin;Cefoxitina;Cefoxitine;Cefoxitinum;CHEBI:209807;CEPHOXITIN;35607-66-0;Spectrum_001399;Cefoxitin (USAN/INN);AC1L9AQF;Prestwick0_000832;Prestwick1_000832;Prestwick2_000832;Prestwick3_000832;Spectrum2_000676;Spectrum3_001491;Spectrum4_000153;Spectrum5_001145;CHEMBL996;BSPBio_000783;BSPBio_003101;KBioGR_000626;KBioSS_001879;DivK1c_000576;SPBio_000771;SPBio_002704;BPBio1_000…	Groups: approved;.Beta.-Lactams;Activity: Antibacterial;(6R,7S)-3-(aminocarbonyloxymethyl)-7-methoxy-8-oxidanylidene-7-(2-thiophen-2-ylethanoylamino)-5-thia-1-azabicyclo[4.2.0]oct-2-ene-2-carboxylic acid;NIAID ChemDB HIV, Opportunistic Infections and Tuberculosis Therapeutics Database;Anti-Bacterial Agents;Human Data;Indication: For the treatment of serious infections caused by susceptible strain…	Pharmacologic Actions;Chemical Actions and Uses;Therapeutic Uses;Anti-Bacterial Agents;Anti-Infective Agents
61	Antibacterial	DB01332	6533629	Ceftizoxime	Cephalosporin	Beta-lactam	Cell wall	InChI=1S/C13H13N5O5S2/c1-23-17-7(5-4-25-13(14)15-5)9(19)16-8-10(20)18-6(12(21)22)2-3-24-11(8)18/h2,4,8,11H,3H2,1H3,(H2,14,15)(H,16,19)(H,21,22)/b17-7-/t8-,11-/m1/s1	NNULBSISHYWZJU-LLKWHZGFSA-N	(6R,7R)-7-[[(2Z)-2-(2-amino-1,3-thiazol-4-yl)-2-methoxyiminoacetyl]amino]-8-oxo-5-thia-1-azabicyclo[4.2.0]oct-2-ene-2-carboxylic acid	C13H13N5O5S2	4	2	6	0	1	3	-1.8905	150.04	5	5	382.401	s1cc(nc1N)C(=NOC)C(=O)NC1C2SCC=C(N2C1=O)C(=O)[O-]	Chemical Actions and Uses;Therapeutic Uses;Anti-Bacterial Agents;Anti-Infective Agents;Pharmacologic Actions	ceftizoxime;Ceftizoximum;Ceftizoxima;Cefizox;Ceftix;Ceftizoximum [INN-Latin];Eposerin;Ceftizoxima [INN-Spanish];FK-749;Epocelin;Ceftizoxime (INN);68401-81-0;AC1O6SWV;Ceftizoxime [INN:BAN];SKF-88373;Ceftizoxime Monosodium Salt;CHEMBL528;UNII-C43C467DPE;FR 13749;C13H13N5O5S2;CHEBI:553473;FK749;syn-7-(2-(2-Amino-4-thiazolyl)-2-methoxyiminoacetamido)-3-cephem-4-carboxylic acid;DB01332;FR-13479;FR-137…	(6R,7R)-7-[[(2Z)-2-(2-azanyl-1,3-thiazol-4-yl)-2-methoxyimino-ethanoyl]amino]-8-oxidanylidene-5-thia-1-azabicyclo[4.2.0]oct-2-ene-2-carboxylic acid;.Beta.-Lactams;Activity: Antibiotic, cephalosporin;Anti-Bacterial Agents;Anti-Infective Agents;Antibiotics;ATC code: J01DD07;Drug / Therapeutic Agent;"For further information visit the FDA Maximum Recommended Therapeutic Dose Database <a href=""http:/…
62	Antibacterial	DB01333	38103	Cephradine	Cephalosporin	Beta-lactam	Cell wall	InChI=1S/C16H19N3O4S/c1-8-7-24-15-11(14(21)19(15)12(8)16(22)23)18-13(20)10(17)9-5-3-2-4-6-9/h2-3,6,10-11,15H,4-5,7,17H2,1H3,(H,18,20)(H,22,23)/t10-,11-,15-/m1/s1	RDLPVSKMFDYCOR-UEKVPHQBSA-N	(6R,7R)-7-[[(2R)-2-amino-2-cyclohexa-1,4-dien-1-ylacetyl]amino]-3-methyl-8-oxo-5-thia-1-azabicyclo[4.2.0]oct-2-ene-2-carboxylic acid	C16H19N3O4S	2	1	5	0	0	3	-1.7029	117.18	3	4	349.411	S1C2N(C(=O)C2NC(=O)C([NH3+])C=2CC=CCC=2)C(C(=O)[O-])=C(C1)C	Anti-Bacterial Agents;Anti-Infective Agents;Chemical Actions and Uses;Therapeutic Uses;Pharmacologic Actions	cephradine;Cefradine;Cephradin;Eskacef;Anspor;Sefril;Cefradina;Cefradinum;Velosef;Cefradin;CHEBI:3547;Cefradinum [INN-Latin];Cefradina [INN-Spanish];Cephradine (USP);Velosef (TN);VELOSEF '125';VELOSEF '250';VELOSEF '500';Anspor (TN);38821-53-3;Cephradine (anhydrous);HSDB 3216;Cefradine (JAN/INN);CEPHRADINE SODIUM;AC1Q6LOA;Cephradine [USAN:BAN];SKF D 39304;EINECS 254-137-8;UNII-9YA6SX5S4D;BRN 6075…	TYPES: Cephems;Anti-Infective Agents;"Same as: <a href=""http://pubchem.ncbi.nlm.nih.gov/summary/summary.cgi?sid=9114"">C06897</a>";Anti-Bacterial Agents;Drug / Therapeutic Agent;Target: D-alanyl-D-alanine carboxypeptidase inhibitor;(6R,7R)-7-[[(2R)-2-azanyl-2-cyclohexa-1,4-dien-1-yl-ethanoyl]amino]-3-methyl-8-oxidanylidene-5-thia-1-azabicyclo[4.2.0]oct-2-ene-2-carboxylic acid;Structure Shown: te…
63	Antibacterial	DB01413	5479537	Cefepime	Cephalosporin	Beta-lactam	Cell wall	InChI=1S/C19H24N6O5S2/c1-25(5-3-4-6-25)7-10-8-31-17-13(16(27)24(17)14(10)18(28)29)22-15(26)12(23-30-2)11-9-32-19(20)21-11/h9,13,17H,3-8H2,1-2H3,(H3-,20,21,22,26,28,29)/b23-12-/t13-,17-/m1/s1	HVFLCNVBZFFHBT-ZKDACBOMSA-N	(6R,7R)-7-[[(2Z)-2-(2-amino-1,3-thiazol-4-yl)-2-methoxyiminoacetyl]amino]-3-[(1-methylpyrrolidin-1-ium-1-yl)methyl]-8-oxo-5-thia-1-azabicyclo[4.2.0]oct-2-ene-2-carboxylate	C19H24N6O5S2	4	2	8	1	2	4	-1.2799	150.04	6	5	480.57	s1cc(nc1N)C(=NOC)C(=O)NC1C2SCC(C[N+]3(CCCC3)C)=C(N2C1=O)C(=O)[O-]	cefepime;Maxipime;Cefepima;Cefepimum [Latin];Cefepima [Spanish];Cefepimum;Axepim;Cepimax;Cepimex;Maxcef;CFPM;88040-23-7;AC1NUIFH;CHEBI:478164;Cefepime (USAN/INN);Cefepime [USAN:INN];BMY 28142;CHEMBL186;UNII-807PW4VQE3;C19H24N6O5S2;HMS2089M18;BMY-28142;ZINC03871924;DB01413;LS-178033;C08111;D02376;Pyrrolidinium, 1-((7-(((2-amino-4-thiazolyl)(methoxyimino)acetyl)amino)-2-carboxy-8-oxo-5-thia-1-azabi…	Same as: <a href="http://pubchem.ncbi.nlm.nih.gov/summary/summary.cgi?sid=7849435">D02376</a>;(6R,7R)-7-[[(2Z)-2-(2-azanyl-1,3-thiazol-4-yl)-2-methoxyimino-ethanoyl]amino]-3-[(1-methylpyrrolidin-1-ium-1-yl)methyl]-8-oxidanylidene-5-thia-1-azabicyclo[4.2.0]oct-2-ene-2-carboxylate;Mechanism of action: Cephalosporins are bactericidal and have the same mode of action as other beta-lactam antibiotics …	Anti-Bacterial Agents;Pharmacologic Actions;Anti-Infective Agents;Therapeutic Uses;Chemical Actions and Uses
64	Antibacterial	DB01414	91562	Cefacetrile	Cephalosporin	Beta-lactam	Cell wall	InChI=1S/C13H13N3O6S/c1-6(17)22-4-7-5-23-12-9(15-8(18)2-3-14)11(19)16(12)10(7)13(20)21/h9,12H,2,4-5H2,1H3,(H,15,18)(H,20,21)/t9-,12-/m1/s1	RRYMAQUWDLIUPV-BXKDBHETSA-N	(6R,7R)-3-(acetyloxymethyl)-7-[(2-cyanoacetyl)amino]-8-oxo-5-thia-1-azabicyclo[4.2.0]oct-2-ene-2-carboxylic acid	C13H13N3O6S	4	1	8	0	1	2	-2.13292	139.63	3	6	338.32	S1C2N(C(=O)C2NC(=O)CC#N)C(C(=O)[O-])=C(C1)COC(=O)C	Anti-Bacterial Agents;Anti-Infective Agents;Therapeutic Uses;Pharmacologic Actions;Chemical Actions and Uses	Cephacetrile;Cefacetril;Cefacetrile;Celospor;Cefacetrilum [INN-Latin];Cefacetrilo [INN-Spanish];Cefacetrilo;Cefacetrilum;7-Cyanacetylamino-cephalosporansaeure;Cefacetrile (INN);AC1L3MBP;EINECS 233-508-8;UNII-FDM21QQ344;Vetrimast [veterinary] (TN);10206-21-0;C13H13N3O6S;C-36278-Ba;Cristacef;Celtol;DB01414;LS-171802;D07629;(6R,7R)-3-Acetoxymethyl-7-(2-cyanacetamido)-8-oxo-5-thia-1-azabicyclo(4.2.0)…	(6R,7R)-3-(acetyloxymethyl)-7-(2-cyanoethanoylamino)-8-oxidanylidene-5-thia-1-azabicyclo[4.2.0]oct-2-ene-2-carboxylic acid;Activity: Antibiotic, chephalosporin;Anti-Bacterial Agents;Anti-Infective Agents;Antibiotics;ATC code: J01DB10;"For further information visit the FDA Maximum Recommended Therapeutic Dose Database <a href=""http://www.fda.gov/AboutFDA/CentersOffices/CDER/ucm092199.htm""target=…
65	Antibacterial	DB01415	5282242	Ceftibuten	Cephalosporin	Beta-lactam	Cell wall	InChI=1S/C15H14N4O6S2/c16-15-17-7(5-27-15)6(1-2-9(20)21)11(22)18-10-12(23)19-8(14(24)25)3-4-26-13(10)19/h1,3,5,10,13H,2,4H2,(H2,16,17)(H,18,22)(H,20,21)(H,24,25)/b6-1-/t10-,13-/m1/s1	UNJFKXSSGBWRBZ-BJCIPQKHSA-N	(6R,7R)-7-[[(Z)-2-(2-amino-1,3-thiazol-4-yl)-4-carboxybut-2-enoyl]amino]-8-oxo-5-thia-1-azabicyclo[4.2.0]oct-2-ene-2-carboxylic acid	C15H14N4O6S2	3	2	7	0	1	3	-2.7176	168.58	4	6	408.415	s1cc(nc1N)C(=CCC(=O)[O-])C(=O)NC1C2SCC=C(N2C1=O)C(=O)[O-]	Chemical Actions and Uses;Therapeutic Uses;Anti-Bacterial Agents;Pharmacologic Actions;Anti-Infective Agents	ceftibuten;Cedax;Ceftibutenum;Ceftibutene;Ceftibuteno;Cephem;cis-Ceftibutin;Antibiotic 7432S;Ceprifran;CHEBI:3510;Ceftem;cis-ceftibuten;Isocef;Keimax;Sch 39720;Sch-39720;Cephalosporin 7432-S;CETB;97519-39-6;AC1NQZPP;Ceftibuten (USAN/INN);Spectrum5_001558;Ceftibutene [INN-French];Ceftibutenum [INN-Latin];Ceftibuteno [INN-Spanish];CHEMBL1605;UNII-IW71N46B4Y;BSPBio_002733;SPECTRUM1505207;7432-S;S 74…	Anti-Bacterial Agents;Target: D-alanyl-D-alanine carboxypeptidase inhibitor;NINDS:1505207;Groups: approved;Microsource:1505207;ATC code: J01DD14;(6R,7R)-7-[[(Z)-2-(2-azanyl-1,3-thiazol-4-yl)-5-oxidanyl-5-oxidanylidene-pent-2-enoyl]amino]-8-oxidanylidene-5-thia-1-azabicyclo[4.2.0]oct-2-ene-2-carboxylic acid;Drug / Therapeutic Agent;Activity: Antibacterial;Anti-Infective Agents;"Same as: <a href=""…
66	Antibacterial	DB01416	6335986	Cefpodoxime	Cephalosporin	Beta-lactam	Cell wall	InChI=1S/C15H17N5O6S2/c1-25-3-6-4-27-13-9(12(22)20(13)10(6)14(23)24)18-11(21)8(19-26-2)7-5-28-15(16)17-7/h5,9,13H,3-4H2,1-2H3,(H2,16,17)(H,18,21)(H,23,24)/b19-8-/t9-,13-/m1/s1	WYUSVOMTXWRGEK-HBWVYFAYSA-N	(6R,7R)-7-[[(2Z)-2-(2-amino-1,3-thiazol-4-yl)-2-methoxyiminoacetyl]amino]-3-(methoxymethyl)-8-oxo-5-thia-1-azabicyclo[4.2.0]oct-2-ene-2-carboxylic acid	C15H17N5O6S2	5	2	8	1	1	3	-1.8739	159.27	5	6	426.454	s1cc(nc1N)C(=NOC)C(=O)NC1C2SCC(COC)=C(N2C1=O)C(=O)[O-]	Anti-Bacterial Agents;Anti-Infective Agents;Chemical Actions and Uses;Pharmacologic Actions;Therapeutic Uses	CEFPODOXIME;Cefpodoxima;Cefpodoximum;Cefpodoxim acid;CHEBI:606443;Cefpodoxime (INN);Epoxim (TN);CPDX;AC1O3S8J;CHEMBL1672;C08114;DB01416;RU 51807;TL8005407;D07650;80210-62-4;(6R,7R)-7-({(2Z)-2-(2-amino-1,3-thiazol-4-yl)-2-[(methyloxy)imino]acetyl}amino)-3-[(methyloxy)methyl]-8-oxo-5-thia-1-azabicyclo[4.2.0]oct-2-ene-2-carboxylic acid;(6R,7R)-7-[[(2Z)-2-(2-amino-1,3-thiazol-4-yl)-2-methoxyiminoacet…	(6R,7R)-7-[[(2Z)-2-(2-azanyl-1,3-thiazol-4-yl)-2-methoxyimino-ethanoyl]amino]-3-(methoxymethyl)-8-oxidanylidene-5-thia-1-azabicyclo[4.2.0]oct-2-ene-2-carboxylic acid;80210-62-4;Activity: Antibiotic, cephalosporin, cephalosporinase-resistant;ATC code: J01DD13;"For further information visit the FDA Maximum Recommended Therapeutic Dose Database <a href=""http://www.fda.gov/AboutFDA/CentersOffices/CD…
67	Antibacterial	DB04133	5773	Cephaloridine	Cephalosporin	Beta-lactam	Cell wall	InChI=1S/C19H17N3O4S2/c23-14(9-13-5-4-8-27-13)20-15-17(24)22-16(19(25)26)12(11-28-18(15)22)10-21-6-2-1-3-7-21/h1-8,15,18H,9-11H2,(H-,20,23,25,26)/t15-,18-/m1/s1	CZTQZXZIADLWOZ-CRAIPNDOSA-N	(6R,7R)-8-oxo-3-(pyridin-1-ium-1-ylmethyl)-7-[(2-thiophen-2-ylacetyl)amino]-5-thia-1-azabicyclo[4.2.0]oct-2-ene-2-carboxylate	C19H17N3O4S2	2	1	7	0	0	4	-0.05143	93.42	3	4	415.494	s1cccc1CC(=O)NC1C2SCC(C[n+]3ccccc3)=C(N2C1=O)C(=O)[O-]	cephaloridine;cefaloridine;Cephaloridin;Cephaloridinum;Cefaloridin;Cefalorizin;Cepaloridin;Loridine;Cefaloridina;Cefaloridinum;Ceflorin;Cepalorin;Ceporin;Glaxoridin;Intrasporin;Kefloridin;Vioviantine;Aliporina;Ampligram;Ceporan;Ceporine;Cilifor;Deflorin;Faredina;Floridin;Keflodin;Keflordin;Kefspor;Lloncefal;Sasperin;Sefacin;Verolgin;Betaine cephaloridine;SCH 11527;50-59-9;Cefaloridinum [INN-Latin…	<a href="http://ctd.mdibl.org/detail.go?view=pathway&type=chem&acc=D002509">Pathways</a>;Drug / Therapeutic Agent;Human Data;on human health by curating chemical-gene/protein interactions and chemical- and gene-disease relationships from;Target: D-alanyl-D-alanine carboxypeptidase inhibitor;Anti-Bacterial Agents;"Same as: <a href=""http://pubchem.ncbi.nlm.nih.gov/summary/summary.cgi?sid=13918"">C…	Chemical Actions and Uses;Therapeutic Uses;Anti-Bacterial Agents;Anti-Infective Agents;Pharmacologic Actions
68	Antibacterial		21743	Cefalonium	Cephalosporin	Beta-lactam	Cell wall	InChI=1S/C20H18N4O5S2/c21-17(26)11-3-5-23(6-4-11)9-12-10-31-19-15(18(27)24(19)16(12)20(28)29)22-14(25)8-13-2-1-7-30-13/h1-7,15,19H,8-10H2,(H3-,21,22,25,26,28,29)/t15-,19-/m1/s1	FMZXNVLFJHCSAF-DNVCBOLYSA-N	(6R,7R)-3-[(4-carbamoylpyridin-1-ium-1-yl)methyl]-8-oxo-7-[(2-thiophen-2-ylacetyl)amino]-5-thia-1-azabicyclo[4.2.0]oct-2-ene-2-carboxylate	C20H18N4O5S2	3	2	8	0	2	4	-0.95253	136.51	4	5	458.519	s1cccc1CC(=O)NC1C2SCC(C[n+]3ccc(cc3)C(=O)N)=C(N2C1=O)C(=O)[O-]	Cephalonium;CEFALONIUM;Cefalonum;Cefalonium [INN-Latin];Cefalonio [INN-Spanish];Lilly 41071;EINECS 226-948-7;BRN 4169337;7-(alpha-Thienylacetamido)-3-(4-carbamoylpyridinomethyl)-3-cephem-4-carboxylic acid;(6R,7R)-3-(4-(4-Carbamoyl-1-pyridiniomethyl)-8-oxo-7-(2-(2-thienyl)acetamido)-5-thia-1-azabicyclo(4.2.0)oct-2-en-2-carboxylat;3-(4-Carbamoylpyridylmethyl)-8-oxo-7-(alpha-(thien-2-yl)acetamido)-5…	Activity: Antibiotic [veterinary];Prestwick:996;Antibiotics;(6R,7R)-3-[(4-aminocarbonylpyridin-1-ium-1-yl)methyl]-8-oxidanylidene-7-(2-thiophen-2-ylethanoylamino)-5-thia-1-azabicyclo[4.2.0]oct-2-ene-2-carboxylate
69	Antibacterial		68597	Cefpimizole	Cephalosporin	Beta-lactam	Cell wall	InChI=1S/C28H26N6O10S2/c35-23(18(16-4-2-1-3-5-16)31-24(36)19-20(27(38)39)30-14-29-19)32-21-25(37)34-22(28(40)41)17(13-45-26(21)34)12-33-9-6-15(7-10-33)8-11-46(42,43)44/h1-7,9-10,14,18,21,26H,8,11-13H2,(H5-,29,30,31,32,35,36,38,39,40,41,42,43,44)/t18-,21-,26-/m1/s1	LNZMRLHZGOBKAN-KAWPREARSA-N	2-[1-[[(6R,7R)-2-carboxy-7-[[(2R)-2-[(5-carboxy-1H-imidazole-4-carbonyl)amino]-2-phenylacetyl]amino]-8-oxo-5-thia-1-azabicyclo[4.2.0]oct-2-en-3-yl]methyl]pyridin-1-ium-4-yl]ethanesulfonate	C28H26N6O10S2	5	4	14	2	4	5	-2.91453	242.54	6	10	668.664	S1C2N(C(=O)C2NC(=O)C(NC(=O)c2nc[nH]c2C(=O)[O-])c2ccccc2)C(C(=O)[O-])=C(C1)C[n+]1ccc(cc1)CCS(=O)(=O)[O-]	Cefpimizole;7-b-[d(-)-a-(4-carboxyimidazole-5-carboxamido)phenylacetamido]-3-(4-b-sulfoethylpyridinium)methyl-3-cephem-4-carboxylic acid;Cefpimizol;Cefpimizolum;84880-03-5;Cefpimizol [Spanish];Cefpimizolum [Latin];AC1Q6LOD;AC1L2A2J;UNII-24S58UHU7N;AR-1H3155;U 63196;2-[1-[[(6R,7R)-2-carboxy-7-[[(2R)-2-[(5-carboxy-1H-imidazole-4-carbonyl)amino]-2-phenylacetyl]amino]-8-oxo-5-thia-1-azabicyclo[4.2.0]…	2-[1-[[(6R,7R)-2-carboxy-7-[[(2R)-2-[(5-carboxy-1H-imidazol-4-yl)carbonylamino]-2-phenyl-ethanoyl]amino]-8-oxidanylidene-5-thia-1-azabicyclo[4.2.0]oct-2-en-3-yl]methyl]pyridin-1-ium-4-yl]ethanesulfonate
70	Antibacterial		71141	Cefminox	Cephalosporin	Beta-lactam	Cell wall	InChI=1S/C16H21N7O7S3/c1-22-15(19-20-21-22)33-4-7-3-32-14-16(30-2,13(29)23(14)10(7)12(27)28)18-9(24)6-31-5-8(17)11(25)26/h8,14H,3-6,17H2,1-2H3,(H,18,24)(H,25,26)(H,27,28)/t8-,14-,16+/m1/s1	JSDXOWVAHXDYCU-VXSYNFHWSA-N	(6R,7S)-7-[[2-[(2S)-2-amino-2-carboxyethyl]sulfanylacetyl]amino]-7-methoxy-3-[(1-methyltetrazol-5-yl)sulfanylmethyl]-8-oxo-5-thia-1-azabicyclo[4.2.0]oct-2-ene-2-carboxylic acid	C16H21N7O7S3	6	1	12	2	4	3	-4.867	210.14	7	7	518.576	S1C2N(C(=O)C2(OC)NC(=O)CSCC([NH3+])C(=O)[O-])C(C(=O)[O-])=C(C1)CSc1nnnn1C	Anti-Bacterial Agents;Pharmacologic Actions;Chemical Actions and Uses;Anti-Infective Agents;Therapeutic Uses	Cefminox;CCRIS 5270;Mt-141;5-Thia-1-azabicyclo(4.2.0)oct-2-ene-2-carboxylic acid, 7-(((((2S)-2-amino-2-carboxyethyl)thio)acetyl)amino)-7-methoxy-3-(((1-methyl-1H-tetrazol-5-yl)thio)methyl)-8-oxo-, (6R,7S)-;5-Thia-1-azabicyclo(4.2.0)oct-2-ene-2-carboxylic acid, 7-((((2-amino-2-carboxyethyl)thio)acetyl)amino)-7-methoxy-3-(((1-methyl-1H-tetrazol-5-yl)thio)methyl)-8-oxo-, (6R-(6alpha,7alpha,7(S*)))-;…	Activity: Antibiotic, cephalosporin;Anti-Infective Agents;Anti-Bacterial Agents;ATC code: J01DC12;Target: D-alanyl-D-alanine carboxypeptidase inhibitor;(6R,7S)-7-[2-[(2S)-2-azanyl-3-oxidanyl-3-oxidanylidene-propyl]sulfanylethanoylamino]-7-methoxy-3-[(1-methyl-1,2,3,4-tetrazol-5-yl)sulfanylmethyl]-8-oxidanylidene-5-thia-1-azabicyclo[4.2.0]oct-2-ene-2-carboxylic acid
71	Antibacterial		127527	Cefbuperazone	Cephalosporin	Beta-lactam	Cell wall	InChI=1S/C22H29N9O9S2/c1-5-29-6-7-30(16(35)15(29)34)20(39)23-12(10(2)32)14(33)24-22(40-4)18(38)31-13(17(36)37)11(8-41-19(22)31)9-42-21-25-26-27-28(21)3/h10,12,19,32H,5-9H2,1-4H3,(H,23,39)(H,24,33)(H,36,37)/t10-,12+,19+,22-/m0/s1	SMSRCGPDNDCXFR-CYWZMYCQSA-N	(6R,7S)-7-[[(2R,3S)-2-[(4-ethyl-2,3-dioxopiperazine-1-carbonyl)amino]-3-hydroxybutanoyl]amino]-7-methoxy-3-[(1-methyltetrazol-5-yl)sulfanylmethyl]-8-oxo-5-thia-1-azabicyclo[4.2.0]oct-2-ene-2-carboxylic acid	C22H29N9O9S2	10	3	13	2	3	4	-3.8109	232.32	9	9	626.652	S1C2N(C(=O)C2(OC)NC(=O)C(NC(=O)N2CCN(CC)C(=O)C2=O)C(O)C)C(C(=O)[O-])=C(C1)CSc1nnnn1C		Tomiporan;CBPZ;76610-84-9;AC1Q6LOY;AC1L2S5M;Cefbuperazone (USAN/INN);AR-1L6983;ST51053954;D03423;A838765;(6R,7S)-7-[[(2R,3S)-2-[(4-ethyl-2,3-dioxopiperazine-1-carbonyl)amino]-3-hydroxybutanoyl]amino]-7-methoxy-3-[(1-methyltetrazol-5-yl)sulfanylmethyl]-8-oxo-5-thia-1-azabicyclo[4.2.0]oct-2-ene-2-carboxylic acid;(6R,7S)-7-[[(2R,3S)-2-[[(4-ethyl-2,3-dioxo-1-piperazinyl)-oxomethyl]amino]-3-hydroxy-1-…	ATC code: J01DC13;Target: D-alanyl-D-alanine carboxypeptidase inhibitor;Activity: Antibacterial;(6R,7S)-7-[[(2R,3S)-2-[[4-ethyl-2,3-bis(oxidanylidene)piperazin-1-yl]carbonylamino]-3-oxidanyl-butanoyl]amino]-7-methoxy-3-[(1-methyl-1,2,3,4-tetrazol-5-yl)sulfanylmethyl]-8-oxidanylidene-5-thia-1-azabicyclo[4.2.0]oct-2-ene-2-carboxylic acid
72	Antibacterial		443991	Cefroxadine	Cephalosporin	Beta-lactam	Cell wall	InChI=1S/C16H19N3O5S/c1-24-9-7-25-15-11(14(21)19(15)12(9)16(22)23)18-13(20)10(17)8-5-3-2-4-6-8/h3-6,8,10-11,15H,2,7,17H2,1H3,(H,18,20)(H,22,23)/t10?,11-,15-/m1/s1	QBHQOFVJNUQDCO-HUFXEGEASA-N	(6R,7R)-7-[(2-amino-2-cyclohexa-2,5-dien-1-ylacetyl)amino]-3-methoxy-8-oxo-5-thia-1-azabicyclo[4.2.0]oct-2-ene-2-carboxylic acid	C16H19N3O5S	3	1	6	0	0	3	-2.263	126.41	3	5	365.41	S1C2N(C(=O)C2NC(=O)C([NH3+])C2C=CCC=C2)C(C(=O)[O-])=C(OC)C1		AC1L9FIG;NCGC00185745-01;(6R,7R)-7-[(2-amino-2-cyclohexa-2,5-dien-1-ylacetyl)amino]-3-methoxy-8-oxo-5-thia-1-azabicyclo[4.2.0]oct-2-ene-2-carboxylic acid	(6R,7R)-7-[(2-azanyl-2-cyclohexa-2,5-dien-1-yl-ethanoyl)amino]-3-methoxy-8-oxidanylidene-5-thia-1-azabicyclo[4.2.0]oct-2-ene-2-carboxylic acid
73	Antibacterial		5485222	Cefetamet pivoxyl	Cephalosporin	Beta-lactam	Cell wall	InChI=1S/C20H25N5O7S2/c1-9-6-33-16-12(23-14(26)11(24-30-5)10-7-34-19(21)22-10)15(27)25(16)13(9)17(28)31-8-32-18(29)20(2,3)4/h7,12,16H,6,8H2,1-5H3,(H2,21,22)(H,23,26)/b24-11+/t12-,16-/m1/s1	DASYMCLQENWCJG-VCUHZILTSA-N	2,2-dimethylpropanoyloxymethyl (6R,7R)-7-[[(2E)-2-(2-amino-1,3-thiazol-4-yl)-2-methoxyiminoacetyl]amino]-3-methyl-8-oxo-5-thia-1-azabicyclo[4.2.0]oct-2-ene-2-carboxylate	C20H25N5O7S2	6	2	11	2	2	3	0.8397	162.51	5	7	511.58	s1cc(nc1N)C(=NOC)C(=O)NC1C2SCC(C)=C(N2C1=O)C(OCOC(=O)C(C)(C)C)=O	Anti-Bacterial Agents;Anti-Infective Agents;Therapeutic Uses;Chemical Actions and Uses;Pharmacologic Actions	Cefetamet pivoxyl;Cefetamet pivaloyloxymethyl ester;Ro 15-8075;Cefetamet pivoxil;Cefetamet pivoxil hydrochloride;5-Thia-1-azabicyclo(4.2.0)oct-2-ene-2-carboxylic acid, 7-(((2-amino-4-thiazolyl)(methoxyimino)acetyl)amino)-3-methyl-8-oxo-, (2,2-dimethyl-1-oxopropoxy)methyl ester, (6R-(6alpha,7beta(Z)))-;5-Thia-1-azabicyclo(4.2.0)oct-2-ene-2-carboxylic acid, 7-(((2Z)-(2-amino-4-thiazolyl)(methoxyimi…	<a target=_blank href="http://boschesci.com?C6204">Bosche Scientific C6204</A>;"<a target=_blank href=""mailto:info@timtec.net?SUBJECT=price and availability of ST51053008"">TimTec ST51053008</A>";2,2-dimethylpropanoyloxymethyl (6R,7R)-7-[[(2E)-2-(2-azanyl-1,3-thiazol-4-yl)-2-methoxyimino-ethanoyl]amino]-3-methyl-8-oxidanylidene-5-thia-1-azabicyclo[4.2.0]oct-2-ene-2-carboxylate;Anti-Bacterial Age…
74	Antibacterial		5487888	Cefetamet	Cephalosporin	Beta-lactam	Cell wall	InChI=1S/C14H15N5O5S2/c1-5-3-25-12-8(11(21)19(12)9(5)13(22)23)17-10(20)7(18-24-2)6-4-26-14(15)16-6/h4,8,12H,3H2,1-2H3,(H2,15,16)(H,17,20)(H,22,23)/b18-7-/t8-,12-/m1/s1	MQLRYUCJDNBWMV-GHXIOONMSA-N	(6R,7R)-7-[[(2Z)-2-(2-amino-1,3-thiazol-4-yl)-2-methoxyiminoacetyl]amino]-3-methyl-8-oxo-5-thia-1-azabicyclo[4.2.0]oct-2-ene-2-carboxylic acid	C14H15N5O5S2	4	2	6	0	1	3	-1.5004	150.04	5	5	396.428	s1cc(nc1N)C(=NOC)C(=O)NC1C2SCC(C)=C(N2C1=O)C(=O)[O-]	Chemical Actions and Uses;Therapeutic Uses;Pharmacologic Actions;Anti-Bacterial Agents;Anti-Infective Agents	cefetamet;Cefetametum;Cefetametum [Latin];65052-63-3;LY097964;5-Thia-1-azabicyclo(4.2.0)oct-2-ene-2-carboxylic acid, 7-(((2-amino-4-thiazolyl)(methoxyimino)acetyl)amino)-3-methyl-8-oxo-, (6R-(6alpha,7beta(Z)))-;Cefetamet hydrochloride;CEMT;AC1NUPYF;Cefetamet (USAN/INN);Cefetamet [USAN:INN];UNII-4R5TV783X3;C14H15N5O5S2;MolPort-002-500-296;LS-176423;D03424;I09-1527;(6R,7R)-7-(2-(2-Amino-4-thiazolyl…	(6R,7R)-7-[[(2Z)-2-(2-azanyl-1,3-thiazol-4-yl)-2-methoxyimino-ethanoyl]amino]-3-methyl-8-oxidanylidene-5-thia-1-azabicyclo[4.2.0]oct-2-ene-2-carboxylic acid;Activity: Antibacterial [veterinary];Anti-Bacterial Agents;Anti-Infective Agents;ATC code: J01DD10;Target: D-alanyl-D-alanine carboxypeptidase inhibitor
75	Antibacterial		6336505	Cefuzonam	Cephalosporin	Beta-lactam	Cell wall	InChI=1S/C16H15N7O5S4/c1-28-21-9(7-5-31-16(17)19-7)12(24)20-10-13(25)23-11(15(26)27)6(4-30-14(10)23)3-29-8-2-18-22-32-8/h2,5,10,14H,3-4H2,1H3,(H2,17,19)(H,20,24)(H,26,27)/b21-9-/t10-,14-/m1/s1	CXHKZHZLDMQGFF-ZSDSSEDPSA-N	(6R,7R)-7-[[(2Z)-2-(2-amino-1,3-thiazol-4-yl)-2-methoxyiminoacetyl]amino]-8-oxo-3-(thiadiazol-5-ylsulfanylmethyl)-5-thia-1-azabicyclo[4.2.0]oct-2-ene-2-carboxylic acid	C16H15N7O5S4	6	2	9	2	2	4	-0.8765	175.82	7	5	512.596	s1cc(nc1N)C(=NOC)C(=O)NC1C2SCC(CSc3snnc3)=C(N2C1=O)C(=O)[O-]		Cefuzonam;Cefuzoname;Cefuzonamum;82219-78-1;Cefuzonam (INN);Cefuzonamum [Latin];AC1O3SM5;UNII-860MT00T7T;CHEMBL1689069;CHEBI:55488;TL8005443;D03432;(-)-(6R,7R)-7-(2-(2-Amino-4-thiazolyl)glyoxylamido)-8-oxo-3-((1,2,3-thiadiazol-5-ylthio)methyl)-5-thia-1-azabicyclo(4.2.0)oct-2-ene-2-carboxylic acid, 7(sup 2)-(Z)-(O-methyloxime);(6R,7R)-7-[[(2Z)-2-(2-amino-1,3-thiazol-4-yl)-2-methoxyiminoacetyl]amin…	(6R,7R)-7-[[(2Z)-2-(2-azanyl-1,3-thiazol-4-yl)-2-methoxyimino-ethanoyl]amino]-8-oxidanylidene-3-(1,2,3-thiadiazol-5-ylsulfanylmethyl)-5-thia-1-azabicyclo[4.2.0]oct-2-ene-2-carboxylic acid;82219-78-1;Activity: Antibacterial;Target: D-alanyl-D-alanine carboxypeptidase inhibitor
76	Antibacterial		6410758	Cefatrizine	Cephalosporin	Beta-lactam	Cell wall	InChI=1S/C18H18N6O5S2/c19-12(8-1-3-10(25)4-2-8)15(26)21-13-16(27)24-14(18(28)29)9(7-31-17(13)24)6-30-11-5-20-23-22-11/h1-5,12-13,17,25H,6-7,19H2,(H,21,26)(H,28,29)(H,20,22,23)/t12-,13-,17-/m1/s1	UOCJDOLVGGIYIQ-PBFPGSCMSA-N	(6R,7R)-7-[[(2R)-2-amino-2-(4-hydroxyphenyl)acetyl]amino]-8-oxo-3-(2H-triazol-4-ylsulfanylmethyl)-5-thia-1-azabicyclo[4.2.0]oct-2-ene-2-carboxylic acid	C18H18N6O5S2	5	3	8	2	3	4	-1.915	178.98	6	5	462.511	S1C2N(C(=O)C2NC(=O)C([NH3+])c2ccc(O)cc2)C(C(=O)[O-])=C(C1)CSc1n[nH]nc1	Anti-Bacterial Agents;Anti-Infective Agents;Chemical Actions and Uses;Pharmacologic Actions;Therapeutic Uses	CEFATRIZINE;51627-14-6;Cefatrizine (USAN);AC1O4Q3U;Ambap51627-14-6;CHEMBL1095284;NCGC00185755-01;D02406;A828691;(6R,7R)-7-[[(2R)-2-amino-2-(4-hydroxyphenyl)-1-oxoethyl]amino]-8-oxo-3-[(2H-triazol-4-ylthio)methyl]-5-thia-1-azabicyclo[4.2.0]oct-2-ene-2-carboxylic acid;(6R,7R)-7-[[(2R)-2-amino-2-(4-hydroxyphenyl)acetyl]amino]-8-oxo-3-(2H-triazol-4-ylsulfanylmethyl)-5-thia-1-azabicyclo[4.2.0]oct-2-en…	(6R,7R)-7-[[(2R)-2-azanyl-2-(4-hydroxyphenyl)ethanoyl]amino]-8-oxidanylidene-3-(2H-1,2,3-triazol-4-ylsulfanylmethyl)-5-thia-1-azabicyclo[4.2.0]oct-2-ene-2-carboxylic acid;Activity: Antibacterial;ATC code: J01DB07;"For further information visit the FDA Maximum Recommended Therapeutic Dose Database <a href=""http://www.fda.gov/AboutFDA/CentersOffices/CDER/ucm092199.htm""target=""_blank"">Website</a…
77	Antibacterial		6436055	Cefcapene	Cephalosporin	Beta-lactam	Cell wall	InChI=1S/C17H19N5O6S2/c1-2-3-8(9-6-30-16(18)20-9)12(23)21-10-13(24)22-11(15(25)26)7(4-28-17(19)27)5-29-14(10)22/h3,6,10,14H,2,4-5H2,1H3,(H2,18,20)(H2,19,27)(H,21,23)(H,25,26)/b8-3-/t10-,14-/m1/s1	HJJRIJDTIPFROI-NVKITGPLSA-N	(6R,7R)-7-[[(Z)-2-(2-amino-1,3-thiazol-4-yl)pent-2-enoyl]amino]-3-(carbamoyloxymethyl)-8-oxo-5-thia-1-azabicyclo[4.2.0]oct-2-ene-2-carboxylic acid	C17H19N5O6S2	4	3	9	1	2	3	-0.9821	180.77	5	6	452.492	s1cc(nc1N)C(=CCC)C(=O)NC1C2SCC(COC(=O)N)=C(N2C1=O)C(=O)[O-]		Cefcapene;135889-00-8;Cefcapene (INN);CFPN;Cefcapene pivoxil free acid;UNII-4D5D3422MW;AC1O5L06;CHEMBL582912;D07638;I14-52646;(6R,7R)-7-((Z)-2-(2-Amino-4-thiazolyl)-2-pentenamido)-3-(hydroxymethyl)-8-oxo-5-thia-1-azabicyclo(4.2.0)oct-2-ene-2-carboxylic acid, carbamate (ester);(6R,7R)-7-[[(Z)-2-(2-amino-1,3-thiazol-4-yl)pent-2-enoyl]amino]-3-(carbamoyloxymethyl)-8-oxo-5-thia-1-azabicyclo[4.2.0]oct…	(6R,7R)-3-(aminocarbonyloxymethyl)-7-[[(Z)-2-(2-azanyl-1,3-thiazol-4-yl)pent-2-enoyl]amino]-8-oxidanylidene-5-thia-1-azabicyclo[4.2.0]oct-2-ene-2-carboxylic acid;Activity: Antibiotic, cephalospolin, cephalosporinase-resistant;ATC code: J01DD17;Target: D-alanyl-D-alanine carboxypeptidase inhibitor
78	Antibacterial		6537430	Ceftiolene	Cephalosporin	Beta-lactam	Cell wall	InChI=1S/C20H18N8O8S3/c1-36-26-10(9-7-39-19(21)22-9)13(30)23-11-15(32)28-12(18(34)35)8(6-38-17(11)28)2-5-37-20-25-24-14(31)16(33)27(20)3-4-29/h2,4-5,7,11,17H,3,6H2,1H3,(H2,21,22)(H,23,30)(H,24,31)(H,34,35)/b5-2+,26-10-/t11-,17-/m1/s1	WJXAHFZIHLTPFR-JLRJEBFFSA-N	(6R,7R)-7-[[(2Z)-2-(2-amino-1,3-thiazol-4-yl)-2-methoxyiminoacetyl]amino]-3-[(E)-2-[[5,6-dioxo-4-(2-oxoethyl)-1H-1,2,4-triazin-3-yl]sulfanyl]ethenyl]-8-oxo-5-thia-1-azabicyclo[4.2.0]oct-2-ene-2-carboxylic acid	C20H18N8O8S3	8	3	11	2	2	4	-2.8451	228.88	8	8	593.602	s1cc(nc1N)C(=NOC)C(=O)NC1C2SCC(C=CSC3=NNC(=O)C(=O)N3CC=O)=C(N2C1=O)C(=O)[O-]		Ceftiolene;Cefatiolene;Ceftiolenum;Ceftiolenum [Latin];AC1O6WUF;UNII-28TV2P33KF;(6R,7R)-7-[[(2Z)-2-(2-amino-1,3-thiazol-4-yl)-2-methoxyiminoacetyl]amino]-3-[(E)-2-[[5,6-dioxo-4-(2-oxoethyl)-1H-1,2,4-triazin-3-yl]sulfanyl]ethenyl]-8-oxo-5-thia-1-azabicyclo[4.2.0]oct-2-ene-2-carboxylic acid;RP-42980;(6R,7R)-7-(2-(2-Amino-4-thiazolyl)glyoxylamido)-3-((E)-2-((4-(formylmethyl)-1,4,5,6-tetrahydro-5,6-d…	(6R,7R)-7-[[(2Z)-2-(2-azanyl-1,3-thiazol-4-yl)-2-methoxyimino-ethanoyl]amino]-3-[(E)-2-[[5,6-bis(oxidanylidene)-4-(2-oxidanylideneethyl)-1H-1,2,4-triazin-3-yl]sulfanyl]ethenyl]-8-oxidanylidene-5-thia-1-azabicyclo[4.2.0]oct-2-ene-2-carboxylic acid
79	Antibacterial		5479539	Cefpirome	Cephalosporin	Beta-lactam	Cell wall	InChI=1S/C22H22N6O5S2/c1-33-26-15(13-10-35-22(23)24-13)18(29)25-16-19(30)28-17(21(31)32)12(9-34-20(16)28)8-27-7-3-5-11-4-2-6-14(11)27/h3,5,7,10,16,20H,2,4,6,8-9H2,1H3,(H3-,23,24,25,29,31,32)/b26-15-/t16-,20-/m1/s1	DKOQGJHPHLTOJR-WHRDSVKCSA-N	(6R,7R)-7-[[(2Z)-2-(2-amino-1,3-thiazol-4-yl)-2-methoxyiminoacetyl]amino]-3-(6,7-dihydro-5H-cyclopenta[b]pyridin-1-ium-1-ylmethyl)-8-oxo-5-thia-1-azabicyclo[4.2.0]oct-2-ene-2-carboxylate	C22H22N6O5S2	4	2	8	2	3	5	-0.77756	153.92	6	5	514.587	s1cc(nc1N)C(=NOC)C(=O)NC1C2SCC(C[n+]3c4CCCc4ccc3)=C(N2C1=O)C(=O)[O-]	CEFPIROME;Cefpiromum;Cefpiroma;HR 810;84957-29-9;Broact;Keiten;Cefpirome (INN);Cefir (TN);AC1NUIFK;HR-810;ZINC21985852;NCGC00181339-01;C11199;D07649;(6R,7R)-7-[[(2Z)-2-(2-amino-1,3-thiazol-4-yl)-2-methoxyiminoacetyl]amino]-3-(6,7-dihydro-5H-cyclopenta[b]pyridin-1-ium-1-ylmethyl)-8-oxo-5-thia-1-azabicyclo[4.2.0]oct-2-ene-2-carboxylate	(6R,7R)-7-[[(2Z)-2-(2-azanyl-1,3-thiazol-4-yl)-2-methoxyimino-ethanoyl]amino]-3-(6,7-dihydro-5H-cyclopenta[b]pyridin-1-ium-1-ylmethyl)-8-oxidanylidene-5-thia-1-azabicyclo[4.2.0]oct-2-ene-2-carboxylate;"<a target=_blank href=""http://www.trc-canada.com/search_cat.php?Option=All&Find=Find&Search=C243500"">Toronto Research Chemicals C243500</A>";"<a target=_blank href=""mailto:anusuabag@apacss.com?S…	Anti-Bacterial Agents;Anti-Infective Agents;Therapeutic Uses;Chemical Actions and Uses;Pharmacologic Actions
80	Antibacterial		6917871	Cefteram	Cephalosporin	Beta-lactam	Cell wall	InChI=1S/C22H27N9O7S2/c1-10-26-29-30(27-10)6-11-7-39-18-14(25-16(32)13(28-36-5)12-8-40-21(23)24-12)17(33)31(18)15(11)19(34)37-9-38-20(35)22(2,3)4/h8,14,18H,6-7,9H2,1-5H3,(H2,23,24)(H,25,32)/b28-13+/t14-,18-/m1/s1	UIYAXIPXULMHAI-BQYZVRGLSA-N	2,2-dimethylpropanoyloxymethyl (6R,7R)-7-[[(2E)-2-(2-amino-1,3-thiazol-4-yl)-2-methoxyiminoacetyl]amino]-3-[(5-methyltetrazol-2-yl)methyl]-8-oxo-5-thia-1-azabicyclo[4.2.0]oct-2-ene-2-carboxylate	C22H27N9O7S2	9	2	13	2	2	4	0.08132	206.11	9	7	593.646	s1cc(nc1N)C(=NOC)C(=O)NC1C2SCC(Cn3nc(nn3)C)=C(N2C1=O)C(OCOC(=O)C(C)(C)C)=O	Anti-Bacterial Agents;Pharmacologic Actions;Chemical Actions and Uses;Anti-Infective Agents;Therapeutic Uses	Tomiron;cefteram pivoxil;Cefteram pivaloyloxymethyl ester;T-2588;BRN 4223783;T 2588;5-Thia-1-azabicyclo(4.2.0)oct-2-ene-2-carboxylic acid, 7-(((2-amino-4-thiazolyl)(methoxyimino)acetyl)amino)-3-((5-methyl-2H-tetrazol-2-yl)methyl)-8-oxo-, (2,2-dimethyl-1-oxopropoxy)methyl ester, (6R-(6-alpha,7-beta(Z)))-;82547-81-7;AC1OCER0;UNII-0OD86RT58C;LS-150026;2,2-dimethylpropanoyloxymethyl (6R,7R)-7-[[(2E)-…	2,2-dimethylpropanoyloxymethyl (6R,7R)-7-[[(2E)-2-(2-azanyl-1,3-thiazol-4-yl)-2-methoxyimino-ethanoyl]amino]-3-[(5-methyl-1,2,3,4-tetrazol-2-yl)methyl]-8-oxidanylidene-5-thia-1-azabicyclo[4.2.0]oct-2-ene-2-carboxylate;Anti-Bacterial Agents;Anti-Infective Agents;Drug / Therapeutic Agent;Reproductive Effect
81	Antibacterial		6918430	Ceftobiprole	Cephalosporin	Beta-lactam	Cell wall	InChI=1S/C20H22N8O6S2/c21-20-24-14(26-36-20)11(25-34)15(29)23-12-17(31)28-13(19(32)33)9(7-35-18(12)28)5-8-2-4-27(16(8)30)10-1-3-22-6-10/h5,10,12,18,22,26H,1-4,6-7H2,(H2,21,24)(H,23,29)(H,32,33)/b8-5+,14-11-/t10-,12-,18-/m1/s1	LXLDMYXULSBRCX-HZEONMFJSA-N	(6R,7R)-7-[[(2Z)-2-(5-amino-1,2,4-thiadiazol-3-ylidene)-2-nitrosoacetyl]amino]-8-oxo-3-[(E)-[2-oxo-1-[(3R)-pyrrolidin-3-yl]pyrrolidin-3-ylidene]methyl]-5-thia-1-azabicyclo[4.2.0]oct-2-ene-2-carboxylic acid	C20H22N8O6S2	6	3	7	3	5	5	-3.6137	206.3	8	6	534.578	S1NC(N=C1N)=C(N=O)C(=O)NC1C2SCC(C=C3CCN(C3=O)C3CC[NH2+]C3)=C(N2C1=O)C(=O)[O-]		Ceftobiprole;AC1OCFF8;UNII-5T97333YZK;CHEMBL407727;BAL 9141;BAL-9141;Ro 63-9141;Ro-63-9141;BAL 9141-000;Ro-63-9141/000;(6R,7R)-7-[[(2Z)-2-(5-amino-1,2,4-thiadiazol-3-ylidene)-2-nitrosoacetyl]amino]-8-oxo-3-[(E)-[2-oxo-1-[(3R)-pyrrolidin-3-yl]pyrrolidin-3-ylidene]methyl]-5-thia-1-azabicyclo[4.2.0]oct-2-ene-2-carboxylic acid;209467-52-7;5-Thia-1-azabicyclo(4.2.0)oct-2-ene-2-carboxylic acid, 7-(((2Z…	(6R,7R)-7-[[(2Z)-2-(5-azanyl-1,2,4-thiadiazol-3-ylidene)-2-nitroso-ethanoyl]amino]-8-oxidanylidene-3-[(E)-[2-oxidanylidene-1-[(3R)-pyrrolidin-3-yl]pyrrolidin-3-ylidene]methyl]-5-thia-1-azabicyclo[4.2.0]oct-2-ene-2-carboxylic acid
82	Antibacterial		9571072	Cefdaloxime	Cephalosporin	Beta-lactam	Cell wall	InChI=1S/C14H15N5O6S2/c1-25-2-5-3-26-12-8(11(21)19(12)9(5)13(22)23)17-10(20)7(18-24)6-4-27-14(15)16-6/h4,8,12,24H,2-3H2,1H3,(H2,15,16)(H,17,20)(H,22,23)/b18-7-/t8-,12-/m1/s1	HOGISBSFFHDTRM-GHXIOONMSA-N	(6R,7R)-7-[[(2Z)-2-(2-amino-1,3-thiazol-4-yl)-2-hydroxyiminoacetyl]amino]-3-(methoxymethyl)-8-oxo-5-thia-1-azabicyclo[4.2.0]oct-2-ene-2-carboxylic acid	C14H15N5O6S2	6	3	7	1	1	3	-2.0461	170.27	5	6	412.427	s1cc(nc1N)C(=NO)C(=O)NC1C2SCC(COC)=C(N2C1=O)C(=O)[O-]		Cefdaloxime;Cefdaloxima;Cefdaloximum;Cefdaloximum [INN-Latin];Cefdaloxima [INN-Spanish];UNII-6856HDT30F;RU 29246;(+)-(6R,7R)-7-(2-(2-Amino-4-thiazolyl)glyoxylamido)-3-(methoxymethyl)-8-oxo-5-thia-1-azabicyclo(4.2.0)oct-2-ene-2-carboxylic acid, 7(sup 2)-(Z)-oxime;139949-08-9;80195-36-4
83	Antibacterial		9571080	Cefozopran	Cephalosporin	Beta-lactam	Cell wall	InChI=1S/C19H17N9O5S2/c1-33-24-11(14-23-19(20)35-25-14)15(29)22-12-16(30)28-13(18(31)32)9(8-34-17(12)28)7-26-5-6-27-10(26)3-2-4-21-27/h2-6,12,17H,7-8H2,1H3,(H3-,20,22,23,25,29,31,32)/b24-11-/t12-,17-/m1/s1	QDUIJCOKQCCXQY-WHJQOFBOSA-N	(6R,7R)-7-[[(2Z)-2-(5-amino-1,2,4-thiadiazol-3-yl)-2-methoxyiminoacetyl]amino]-3-(imidazo[1,2-b]pyridazin-4-ium-1-ylmethyl)-8-oxo-5-thia-1-azabicyclo[4.2.0]oct-2-ene-2-carboxylate	C19H17N9O5S2	6	2	8	2	3	5	-2.2235	184.85	9	5	515.535	s1nc(nc1N)C(=NOC)C(=O)NC1C2SCC(Cn3c4[n+](nccc4)cc3)=C(N2C1=O)C(=O)[O-]		Cefozopran;CZOP;Cefozopran (INN);Cefozopran [INN];SCE 2787;CCRIS 6737;C19H17N9O5S2;ZINC22008130;LS-172220;ST51053161;C11203;D01052;I06-1627;(-)-1-(((6R,7R)-7-(2-(5-Amino-1,2,4-thiadiazol-3-yl)glyoxylamido)-2-carboxy-8-oxo-5-thia-1-azabicyclo(4.2.0)oct-2-en-3-yl)methyl)-1H-imidazo(1,2-b)pyridazin-4-ium hydroxide inner salt, 7(sup 2)-(Z)-(O-methyloxime);Imidazo(1,2-b)pyridazinium, 1-((6R,7R)-7-(((2…	<a target=_blank href="mailto:anusuabag@apacss.com?SUBJECT=price and availability of 870265">APAC Sourcing Solutions 870265</A>;Activity: Antibiotic;ATC code: J01DE03;"Same as: <a href=""http://pubchem.ncbi.nlm.nih.gov/summary/summary.cgi?sid=13384"">C11203</a>";"Same as: <a href=""http://pubchem.ncbi.nlm.nih.gov/summary/summary.cgi?sid=7848115"">D01052</a>";Target: D-alanyl-D-alanine carboxypept…
84	Antibacterial		9571084	Cefquinome	Cephalosporin	Beta-lactam	Cell wall	InChI=1S/C23H24N6O5S2/c1-34-27-16(14-11-36-23(24)25-14)19(30)26-17-20(31)29-18(22(32)33)13(10-35-21(17)29)9-28-8-4-6-12-5-2-3-7-15(12)28/h4,6,8,11,17,21H,2-3,5,7,9-10H2,1H3,(H3-,24,25,26,30,32,33)/b27-16+/t17-,21-/m1/s1	YWKJNRNSJKEFMK-KJXIDEHUSA-N	(6R,7R)-7-[[(2E)-2-(2-amino-1,3-thiazol-4-yl)-2-methoxyiminoacetyl]amino]-8-oxo-3-(5,6,7,8-tetrahydroquinolin-1-ium-1-ylmethyl)-5-thia-1-azabicyclo[4.2.0]oct-2-ene-2-carboxylate	C23H24N6O5S2	4	2	8	2	3	5	-0.38746	153.92	6	5	528.614	s1cc(nc1N)C(=NOC)C(=O)NC1C2SCC(C[n+]3c4CCCCc4ccc3)=C(N2C1=O)C(=O)[O-]		Cefquinoma;Cefquinomum;Cefquinome;84957-30-2;Cefquinome [INN:BAN];Cefquinomum [INN-Latin];Cefquinoma [INN-Spanish];UNII-Z74S078CWP;HR 111V;ST51053321;I06-1982
85	Antibacterial		9576734	Cefodizime	Cephalosporin	Beta-lactam	Cell wall	InChI=1S/C20H20N6O7S4.2Na/c1-7-10(3-11(27)28)37-20(22-7)36-5-8-4-34-17-13(16(30)26(17)14(8)18(31)32)24-15(29)12(25-33-2)9-6-35-19(21)23-9;;/h6,13,17H,3-5H2,1-2H3,(H2,21,23)(H,24,29)(H,27,28)(H,31,32);;/b25-12+;;/t13-,17-;;/m1../s1	AFILJETUDYIPBX-QQFCNTMUSA-N	(6R,7R)-7-[[(2E)-2-(2-amino-1,3-thiazol-4-yl)-2-methoxyiminoacetyl]amino]-3-[[5-(carboxymethyl)-4-methyl-1,3-thiazol-2-yl]sulfanylmethyl]-8-oxo-5-thia-1-azabicyclo[4.2.0]oct-2-ene-2-carboxylic acid; sodium	C20H20N6Na2O7S4	5	2	11	2	2	4	-1.67071	203.06	6	7	582.663	s1c(CC(=O)[O-])c(nc1SCC=1CSC2N(C(=O)C2NC(=O)C(=NOC)c2nc(sc2)N)C=1C(=O)[O-])C	Therapeutic Uses;Anti-Bacterial Agents;Anti-Infective Agents;Chemical Actions and Uses;Pharmacologic Actions	cefodizime sodium;Cefodizime disodium salt;THR-221;CEFODIZIME DISODIUM;Cefodizime Sodium [JAN];HR 221;S 77 1221 B;5-Thia-1-azabicyclo(4.2.0)oct-2-ene-2-carboxylic acid, 7-(((2-amino-4-thiazolyl)(methoxyimino)acetyl)amino)-3-(((5-(carboxymethyl)-4-methyl-2-thiazolyl)thio)methyl)-8-oxo-, disodium salt, (6R-(6-alpha,7-beta(Z)))-;5-Thia-1-azabicyclo(4.2.0)oct-2-ene-2-carboxylic acid, 7-(((2Z)-(2-amin…	Antibiotics
86	Antibacterial		9578573	Cefovecin	Cephalosporin	Beta-lactam	Cell wall	InChI=1S/C17H19N5O6S2/c1-27-21-10(8-6-30-17(18)19-8)13(23)20-11-14(24)22-12(16(25)26)7(5-29-15(11)22)9-3-2-4-28-9/h6,9,11,15H,2-5H2,1H3,(H2,18,19)(H,20,23)(H,25,26)/b21-10-/t9-,11+,15?/m0/s1	ZJGQFXVQDVCVOK-LTRDADOWSA-N	(7R)-7-[[(2Z)-2-(2-amino-1,3-thiazol-4-yl)-2-methoxyiminoacetyl]amino]-8-oxo-3-[(2S)-oxolan-2-yl]-5-thia-1-azabicyclo[4.2.0]oct-2-ene-2-carboxylic acid	C17H19N5O6S2	5	2	7	1	2	4	-1.3413	159.27	5	6	452.492	s1cc(nc1N)C(=NOC)C(=O)NC1C2SCC(C3OCCC3)=C(N2C1=O)C(=O)[O-]	Cefovecin;234096-34-5;Cefovecin [INN];UNII-0D1OL46ZIE;A816702;(6R,7R)-7-(((2Z)-(2-Aminothiazol-4-yl)(methoxyimino)acetyl)amino)-8-oxo-3-((2S)-tetrahydrofuran-2-yl)-5-thia-1-azabicyclo(4.2.0)oct-2-ene-2-carboxylic acid;(7R)-7-[[(2Z)-2-(2-amino-4-thiazolyl)-2-methoxyimino-1-oxoethyl]amino]-8-oxo-3-[(2S)-2-oxolanyl]-5-thia-1-azabicyclo[4.2.0]oct-2-ene-2-carboxylic acid;(7R)-7-[[(2Z)-2-(2-azanyl-1,3-…	Antibacterial (veterinary drug);Cephalosporin
87	Antibacterial		9690121	Cefmatilen	Cephalosporin	Beta-lactam	Cell wall	InChI=1S/C15H14N8O5S4.ClH.H2O/c16-15-18-5(2-30-15)8(21-28)11(24)19-9-12(25)23-10(14(26)27)6(3-29-13(9)23)31-4-32-7-1-17-22-20-7;;/h1-2,9,13,28H,3-4H2,(H2,16,18)(H,19,24)(H,26,27)(H,17,20,22);1H;1H2/b21-8-;;/t9-,13-;;/m1../s1	LBWIJMWZWJRRMO-AWXOXGPMSA-N	(6R,7R)-7-[[(2Z)-2-(2-amino-1,3-thiazol-4-yl)-2-hydroxyiminoacetyl]amino]-8-oxo-3-(2H-triazol-4-ylsulfanylmethylsulfanyl)-5-thia-1-azabicyclo[4.2.0]oct-2-ene-2-carboxylic acid hydrate hydrochloride	C15H17ClN8O6S4	7	4	9	2	2	4	-1.1339	202.61	8	5	513.584	s1cc(nc1N)C(=NO)C(=O)NC1C2SCC(SCSc3n[nH]nc3)=C(N2C1=O)C(=O)[O-]		Cefmatilen hydrochloride hydrate;S-1090;Cefmatilen hydrochloride hydrate (JAN);D01961;154776-45-1	Activity: Antibacterial;Target: D-alanyl-D-alanine carboxypeptidase inhibitor
88	Antibacterial		9962077	Ceftaroline fosamil	Cephalosporin	Beta-lactam	Cell wall	InChI=1S/C22H21N8O8PS4.C2H4O2/c1-3-38-26-13(16-25-21(43-28-16)27-39(35,36)37)17(31)24-14-18(32)30-15(20(33)34)12(9-40-19(14)30)42-22-23-11(8-41-22)10-4-6-29(2)7-5-10;1-2(3)4/h4-8,14,19H,3,9H2,1-2H3,(H4-,24,25,27,28,31,33,34,35,36,37);1H3,(H,3,4)/b26-13-;/t14-,19-;/m1./s1	UGHHNQFYEVOFIV-VRDMTWHKSA-N	acetic acid; (6R,7R)-7-[[(2Z)-2-ethoxyimino-2-[5-(phosphonoamino)-1,2,4-thiadiazol-3-yl]acetyl]amino]-3-[[4-(1-methylpyridin-1-ium-4-yl)-1,3-thiazol-2-yl]sulfanyl]-8-oxo-5-thia-1-azabicyclo[4.2.0]oct-2-ene-2-carboxylate	C24H25N8O10PS4	6	1	12	2	4	5	-1.4967	204.89	8	8	681.672	s1cc(nc1SC=1CSC2N(C(=O)C2NC(=O)C(=NOCC)c2nc(sn2)N=P([O-])([O-])[O-])C=1C(=O)[O-])-c1cc[n+](cc1)C		Ceftaroline fosamil acetate;PPI-0903;Teflaro;Zinforo;CHEMBL454983;TAK-599
89	Antibacterial		23671563	Ceftiofur	Cephalosporin	Beta-lactam	Cell wall	InChI=1S/C19H17N5O7S3.Na/c1-30-23-11(9-7-34-19(20)21-9)14(25)22-12-15(26)24-13(17(27)28)8(5-32-16(12)24)6-33-18(29)10-3-2-4-31-10;/h2-4,7,12,16H,5-6H2,1H3,(H2,20,21)(H,22,25)(H,27,28);/q;+1/p-1/b23-11-;/t12-,16-;/m1./s1	RFLHUYUQCKHUKS-JUODUXDSSA-M	sodium (6R,7R)-7-[[(2Z)-2-(2-amino-1,3-thiazol-4-yl)-2-methoxyiminoacetyl]amino]-3-(furan-2-carbonylsulfanylmethyl)-8-oxo-5-thia-1-azabicyclo[4.2.0]oct-2-ene-2-carboxylate	C19H16N5NaO7S3	5	2	10	2	2	4	-0.3537	180.25	5	7	522.563	s1cc(nc1N)C(=NOC)C(=O)NC1C2SCC(CSC(=O)c3occc3)=C(N2C1=O)C(=O)[O-]	Chemical Actions and Uses;Therapeutic Uses;Anti-Infective Agents;Anti-Bacterial Agents;Pharmacologic Actions	Ceftiofur sodium;Naxcel;Ceftiofur monosodium salt;CCRIS 7601;U-64279E;104010-37-9;5-Thia-1-azabicyclo(4.2.0)oct-2-ene-2-carboxylic acid, 7-(((2-amino-4-thiazolyl)(methoxyimino)acetyl)amino)-3-(((2-furanylcarbonyl)thio)methyl)-8-oxo-, monosodium salt, (6R-(6alpha,7beta(Z)))-;Ceftiofur sodium (TN);Ceftiofur sodium [USAN];UNII-NHI34IS56E;Ceftiofur sodium (JAN/USAN);C19H16N5O7S3.Na;80370-57-6 (Parent…	Activity: Antibacterial [veterinary];Mutation data;"Same as: <a href=""http://pubchem.ncbi.nlm.nih.gov/summary/summary.cgi?sid=585207"">C13143</a>";"Same as: <a href=""http://pubchem.ncbi.nlm.nih.gov/summary/summary.cgi?sid=7848745"">D01682</a>";Target: D-alanyl-D-alanine carboxypeptidase inhibitor
90	Antibacterial		71736	Cefazedone	Cephalosporin	Beta-lactam	Cell wall	InChI=1S/C18H15Cl2N5O5S3/c1-7-22-23-18(33-7)32-6-8-5-31-16-12(15(28)25(16)13(8)17(29)30)21-11(26)4-24-2-9(19)14(27)10(20)3-24/h2-3,12,16H,4-6H2,1H3,(H,21,26)(H,29,30)/t12-,16-/m1/s1	VTLCNEGVSVJLDN-MLGOLLRUSA-N	(6R,7R)-7-[[2-(3,5-dichloro-4-oxopyridin-1-yl)acetyl]amino]-3-[(5-methyl-1,3,4-thiadiazol-2-yl)sulfanylmethyl]-8-oxo-5-thia-1-azabicyclo[4.2.0]oct-2-ene-2-carboxylic acid	C18H15Cl2N5O5S3	5	1	8	1	2	4	0.38762	135.63	5	5	547.444	ClC1=CN(C=C(Cl)C1=O)CC(=O)NC1C2SCC(CSc3sc(nn3)C)=C(N2C1=O)C(=O)[O-]	Cefazedone;Refosporene;Cefazedona;Cefazedonum;Cefazedonum [INN-Latin];Cefazedona [INN-Spanish];56187-47-4;BRN 1097746;(6R,7R)-7-(2-(3,5-Dichloro-4-oxo-1(4H)-pyridyl)acetamido)-3-(((5-methyl-1,3,4-thiadiazol-2-yl)thio)methyl)-8-oxo-5-thia-1-azabicyclo(4.2.0)-oct-2-ene-2-carboxylic acid;(6R-trans)7-(((3,5-Dichloro-4-oxo-1(4H)-pyridinyl)acetyl)amino)-3-(((5-methyl-1,3,4-thiadiazol-2-yl)thio)methyl)-…	(6R,7R)-7-[2-[3,5-bis(chloranyl)-4-oxidanylidene-pyridin-1-yl]ethanoylamino]-3-[(5-methyl-1,3,4-thiadiazol-2-yl)sulfanylmethyl]-8-oxidanylidene-5-thia-1-azabicyclo[4.2.0]oct-2-ene-2-carboxylic acid;.Beta.-Lactams;Activity: Antibiotic, cephalosporin;Anti-Bacterial Agents;Anti-Infective Agents;ATC code: J01DB06;Drug / Therapeutic Agent;InChIKey: VTLCNEGVSVJLDN-MLGOLLRUSA-N;NIAID ChemDB HIV, Opportu…	Chemical Actions and Uses;Pharmacologic Actions;Anti-Bacterial Agents;Anti-Infective Agents;Therapeutic Uses
91	Antibacterial		71141	Cefminox	Cephalosporin	Beta-lactam	Cell wall	InChI=1S/C16H21N7O7S3/c1-22-15(19-20-21-22)33-4-7-3-32-14-16(30-2,13(29)23(14)10(7)12(27)28)18-9(24)6-31-5-8(17)11(25)26/h8,14H,3-6,17H2,1-2H3,(H,18,24)(H,25,26)(H,27,28)/t8-,14-,16+/m1/s1	JSDXOWVAHXDYCU-VXSYNFHWSA-N	(6R,7S)-7-[[2-[(2S)-2-amino-2-carboxyethyl]sulfanylacetyl]amino]-7-methoxy-3-[(1-methyltetrazol-5-yl)sulfanylmethyl]-8-oxo-5-thia-1-azabicyclo[4.2.0]oct-2-ene-2-carboxylic acid	C16H21N7O7S3	6	1	12	2	4	3	-4.867	210.14	7	7	518.576	S1C2N(C(=O)C2(OC)NC(=O)CSCC([NH3+])C(=O)[O-])C(C(=O)[O-])=C(C1)CSc1nnnn1C	Cefminox;CCRIS 5270;Mt-141;5-Thia-1-azabicyclo(4.2.0)oct-2-ene-2-carboxylic acid, 7-(((((2S)-2-amino-2-carboxyethyl)thio)acetyl)amino)-7-methoxy-3-(((1-methyl-1H-tetrazol-5-yl)thio)methyl)-8-oxo-, (6R,7S)-;5-Thia-1-azabicyclo(4.2.0)oct-2-ene-2-carboxylic acid, 7-((((2-amino-2-carboxyethyl)thio)acetyl)amino)-7-methoxy-3-(((1-methyl-1H-tetrazol-5-yl)thio)methyl)-8-oxo-, (6R-(6alpha,7alpha,7(S*)))-;…	Activity: Antibiotic, cephalosporin;Anti-Infective Agents;Anti-Bacterial Agents;ATC code: J01DC12;Target: D-alanyl-D-alanine carboxypeptidase inhibitor;(6R,7S)-7-[2-[(2S)-2-azanyl-3-oxidanyl-3-oxidanylidene-propyl]sulfanylethanoylamino]-7-methoxy-3-[(1-methyl-1,2,3,4-tetrazol-5-yl)sulfanylmethyl]-8-oxidanylidene-5-thia-1-azabicyclo[4.2.0]oct-2-ene-2-carboxylic acid	Anti-Bacterial Agents;Pharmacologic Actions;Chemical Actions and Uses;Anti-Infective Agents;Therapeutic Uses
92	Antibacterial		65755	Ceftezole	Cephalosporin	Beta-lactam	Cell wall	InChI=1S/C13H12N8O4S3/c22-7(1-20-4-14-18-19-20)16-8-10(23)21-9(12(24)25)6(2-26-11(8)21)3-27-13-17-15-5-28-13/h4-5,8,11H,1-3H2,(H,16,22)(H,24,25)/t8-,11-/m1/s1	DZMVCVMFETWNIU-LDYMZIIASA-N	(6R,7R)-8-oxo-7-[[2-(tetrazol-1-yl)acetyl]amino]-3-(1,3,4-thiadiazol-2-ylsulfanylmethyl)-5-thia-1-azabicyclo[4.2.0]oct-2-ene-2-carboxylic acid	C13H12N8O4S3	7	1	8	1	1	4	-2.0128	158.92	8	4	439.481	s1cnnc1SCC=1CSC2N(C(=O)C2NC(=O)Cn2nnnc2)C=1C(=O)[O-]	Ceftezole;Ceftezolum;Ceftezol;CG-B 3 Q;26973-24-0;CTZ;Ceftezolo;Demethylcefazolin;Ceftezole (INN);AC1Q6LOU;Ceftezol [INN-Spanish];Ceftezolum [INN-Latin];AC1L23WH;UNII-2Z86SYP11W;CHEMBL1697829;41136-22-5 (hydrochloride salt);NCGC00182064-02;D07656;A818761;(6R,7R)-8-oxidanylidene-7-[2-(1,2,3,4-tetrazol-1-yl)ethanoylamino]-3-(1,3,4-thiadiazol-2-ylsulfanylmethyl)-5-thia-1-azabicyclo[4.2.0]oct-2-ene-2…	Target: D-alanyl-D-alanine carboxypeptidase inhibitor;ATC code: J01DB12;(6R,7R)-8-oxidanylidene-7-[2-(1,2,3,4-tetrazol-1-yl)ethanoylamino]-3-(1,3,4-thiadiazol-2-ylsulfanylmethyl)-5-thia-1-azabicyclo[4.2.0]oct-2-ene-2-carboxylic acid;Structure Shown: tested chemical;Antibiotics;Anti-Infective Agents;Anti-Bacterial Agents;InChIKey: DZMVCVMFETWNIU-LDYMZIIASA-N;"Substance included in EPA DSSTox FDAMD…	Chemical Actions and Uses;Therapeutic Uses;Anti-Infective Agents;Anti-Bacterial Agents;Pharmacologic Actions
93	Antibacterial		23702658	Cefazaflur	Cephalosporin	Beta-lactam	Cell wall	InChI=1S/C13H13F3N6O4S3.Na/c1-21-12(18-19-20-21)28-3-5-2-27-10-7(9(24)22(10)8(5)11(25)26)17-6(23)4-29-13(14,15)16;/h7,10H,2-4H2,1H3,(H,17,23)(H,25,26);/q;+1/p-1/t7-,10-;/m1./s1	OTPDSOBPIAYYBT-YZUKSGEXSA-M	sodium (6R,7R)-3-[(1-methyltetrazol-5-yl)sulfanylmethyl]-8-oxo-7-[[2-(trifluoromethylsulfanyl)acetyl]amino]-5-thia-1-azabicyclo[4.2.0]oct-2-ene-2-carboxylate	C13H12F3N6NaO4S3	5	1	9	0	2	3	-0.6817	133.14	6	4	469.469	S1C2N(C(=O)C2NC(=O)CSC(F)(F)F)C(C(=O)[O-])=C(C1)CSc1nnnn1C	52123-49-6;Cefazaflur;Cefazaflur sodium (USAN);UNII-8NJ5RWV39D;SKF 59962;SKF-59962;D03422;5-Thia-1-azabicyclo(4.2.0)oct-2-ene-2-carboxylic acid, 3-(((1-methyl-1H-tetrazol-5-yl)thio)methyl)-8-oxo-7-((((trifluoromethyl)thio)acetyl)amino)-, monosodium salt (6R-trans)-;7-Trifluoromethylthioacetamido-3-(1-methyl-lH-tetrazol-5-ylthiomethyl)-3-cephem-4-carboxylic acid	Activity: Antibacterial;Antibiotics;Target: D-alanyl-D-alanine carboxypeptidase inhibitor
94	Antibacterial		656575	Cefsulodin	Cephalosporin	Beta-lactam	Cell wall	InChI=1S/C22H20N4O8S2/c23-18(27)13-6-8-25(9-7-13)10-14-11-35-21-15(20(29)26(21)16(14)22(30)31)24-19(28)17(36(32,33)34)12-4-2-1-3-5-12/h1-9,15,17,21H,10-11H2,(H4-,23,24,27,28,30,31,32,33,34)/t15-,17-,21-/m1/s1	SYLKGLMBLAAGSC-QLVMHMETSA-N	(6R,7R)-3-[(4-carbamoylpyridin-1-ium-1-yl)methyl]-8-oxo-7-[[(2R)-2-phenyl-2-sulfoacetyl]amino]-5-thia-1-azabicyclo[4.2.0]oct-2-ene-2-carboxylate	C22H20N4O8S2	3	2	9	2	2	4	-1.8747	187.72	4	8	531.546	S1C2N(C(=O)C2NC(=O)C(S(=O)(=O)[O-])c2ccccc2)C(C(=O)[O-])=C(C1)C[n+]1ccc(cc1)C(=O)N	cefsulodin;Cefsulodine;Cefsulodino;Cefsulodinum;Cefsulodin (INN);AC1LCV81;CHEBI:3507;(6R,7R)-3-[(4-carbamoylpyridin-1-ium-1-yl)methyl]-8-oxo-7-[[(2R)-2-phenyl-2-sulfoacetyl]amino]-5-thia-1-azabicyclo[4.2.0]oct-2-ene-2-carboxylate;62587-73-9;C11253;D07653;(6R,7R)-3-[(4-carbamoylpyridinium-1-yl)methyl]-8-oxo-7-{[(2R)-2-phenyl-2-sulfoacetyl]amino}-5-thia-1-azabicyclo[4.2.0]oct-2-ene-2-carboxylate;7b…	Same as: <a href="http://pubchem.ncbi.nlm.nih.gov/summary/summary.cgi?sid=51091957">D07653</a>;"Same as: <a href=""http://pubchem.ncbi.nlm.nih.gov/summary/summary.cgi?sid=13430"">C11253</a>";Activity: Antibiotic, cephalosporin;ATC code: J01DD03;Target: D-alanyl-D-alanine carboxypeptidase inhibitor;(6R,7R)-3-[(4-aminocarbonylpyridin-1-ium-1-yl)methyl]-8-oxidanylidene-7-[[(2R)-2-phenyl-2-sulfo-etha…	Anti-Bacterial Agents;Pharmacologic Actions;Chemical Actions and Uses;Therapeutic Uses;Anti-Infective Agents
95	Antibacterial		9809656	Tomopenem	Cephalosporin	Beta-lactam	Cell wall	InChI=1S/C23H35N7O6S/c1-10-17-16(11(2)31)21(34)30(17)18(22(35)36)19(10)37-13-6-14(28(3)9-13)20(33)29-5-4-12(8-29)27-15(32)7-26-23(24)25/h10-14,16-17,31H,4-9H2,1-3H3,(H,27,32)(H,35,36)(H4,24,25,26)/t10-,11-,12+,13+,14+,16-,17-/m1/s1	KEDAXBWZURNCHS-GPODMPQUSA-N	(4R,5S,6S)-3-[(3S,5S)-5-[(3S)-3-[[2-(diaminomethylideneamino)acetyl]amino]pyrrolidine-1-carbonyl]-1-methylpyrrolidin-3-yl]sulfanyl-6-[(1R)-1-hydroxyethyl]-4-methyl-7-oxo-1-azabicyclo[3.2.0]hept-2-ene-2-carboxylic acid	C23H35N7O6S	4	2	10	3	4	4	-6.7347	200.53	7	6	538.65	S(C=1C(C2N(C(=O)C2C(O)C)C=1C(=O)[O-])C)C1CC([NH+](C1)C)C(=O)N1CC(NC(=O)C[NH+]=C(N)N)CC1	Tomopenem;CS-023;2-carboxylic acid;Tomopenem (INN/USAN);CHEMBL389847;222400-20-6;RO-4908463;D09022;R-1558;R-115685;(4R,5S,6S)-3-{[(3S,5S)-5-{[(3S)-3-{[N-(Diaminomethylidene)glycyl]amino}pyrrolidin-1-yl]carbonyl}-1-methylpyrrolidin-3-yl]sulfanyl}-6-[(1R)-1-hydroxyethyl]-4-methyl-7-oxo-1-azabicyclo[3.2.0]hept-2-ene-	.Beta.-Lactams;Activity: Antibiotic;NIAID ChemDB HIV, Opportunistic Infections and Tuberculosis Therapeutics Database
96	Antibacterial	DB00440	5578	Trimethoprim	Diaminopyrimidine	Miscellaneous	Antifolate	InChI=1S/C14H18N4O3/c1-19-10-5-8(6-11(20-2)12(10)21-3)4-9-7-17-14(16)18-13(9)15/h5-7H,4H2,1-3H3,(H4,15,16,17,18)	IEDVJHCEMCRBQM-UHFFFAOYSA-N	5-[(3,4,5-trimethoxyphenyl)methyl]pyrimidine-2,4-diamine	C14H18N4O3	5	2	5	0	0	2	1.25757	105.51	4	3	290.323	O(C)c1c(OC)cc(cc1OC)Cc1cnc(nc1N)N	Anti-Infective Agents, Urinary;Chemical Actions and Uses;Enzyme Inhibitors;Molecular Mechanisms of Pharmacological Action;Anti-Infective Agents;Antimalarials;Therapeutic Uses;Antiprotozoal Agents;Folic Acid Antagonists;Renal Agents;Antiparasitic Agents;Pharmacologic Actions	trimethoprim;Proloprim;Trimpex;Bactramin;Monotrim;Monotrimin;Syraprim;Trimopan;738-70-5;Sulfamethoprim;Monoprim;Sulmeprim;Trimanyl;Trimetoprim;Wellcoprim;Abaprim;Triprim;Uretrim;Apo-Sulfatrim;Trimeth/Sulfa;component of Bactrim;Streptoplus;Sulfoxaprim;Trimethoprime;Trimethoprimum;Trimetoprima;Anitrim;Antrima;Antrimox;Bacidal;Bacticel;Bactoprim;Bencole;Bethaprim;Biosulten;Briscotrim;Chemotrin;Coliz…	Antiparasitic Agents;Structure Evaluation:Consistent with Molecular Formula.;Oxido-Reductase;Renal Agents;"ncgc library id: <a href=""http://ncgc.nih.gov/db/browse.aspx?libid=tocris"">tocris</a>";PDB Accession Code 2W9H;"<a href=""http://www.tcieurope.eu/en/catalog/T2286.html"">TCI Europe</a>";"<a href=""http://www.tokyokasei.co.jp/catalog/T2286.html"">TCI Japan (Tokyo Kasei Kogyo)</a>";Groups: a…
97	Antibacterial		65450	Tetroxoprim	Diaminopyrimidine	Miscellaneous	Antifolate	InChI=1S/C16H22N4O4/c1-21-4-5-24-14-12(22-2)7-10(8-13(14)23-3)6-11-9-19-16(18)20-15(11)17/h7-9H,4-6H2,1-3H3,(H4,17,18,19,20)	WSWJIZXMAUYHOE-UHFFFAOYSA-N	5-[[3,5-dimethoxy-4-(2-methoxyethoxy)phenyl]methyl]pyrimidine-2,4-diamine	C16H22N4O4	6	2	8	0	0	2	1.27417	114.74	4	4	334.376	O(CCOC)c1c(OC)cc(cc1OC)Cc1cnc(nc1N)N	Pharmacologic Actions;Chemical Actions and Uses;Anti-Infective Agents;Therapeutic Uses	Tetroxoprim;Tetroxoprima;Tetroxoprime;Tetroxoprimum;Tetroxoprima [Spanish];Tetroxoprime [INN-French];Tetroxoprimum [INN-Latin];Tetroxoprima [INN-Spanish];53808-87-0;He 781;BW 32 U;EINECS 258-789-4;BRN 4271695;2,4-Diamino-5-(3,5-dimethoxy-4-(2-methoxyethoxy)benzyl)pyrimidine;5-((3,5-Dimethoxy-4-(2-methoxyethoxy)phenyl)methyl)pyrimidinediamine;2,4-Pyrimidinediamine, 5-((3,5-dimethoxy-4-(2-methoxyet…	Whole Molecule;Pyrimidines;5-[[3,5-dimethoxy-4-(2-methoxyethoxy)phenyl]methyl]pyrimidine-2,4-diamine;Drug / Therapeutic Agent;Chemotherapeutic;InChIKey: WSWJIZXMAUYHOE-UHFFFAOYSA-N;Anti-infective agents;Activity: Antibacterial;NIAID ChemDB HIV, Opportunistic Infections and Tuberculosis Therapeutics Database
98	Antibacterial		68760	Brodimoprim	Diaminopyrimidine	Miscellaneous	Antifolate	InChI=1S/C13H15BrN4O2/c1-19-9-4-7(5-10(20-2)11(9)14)3-8-6-17-13(16)18-12(8)15/h4-6H,3H2,1-2H3,(H4,15,16,17,18)	BFCRRLMMHNLSCP-UHFFFAOYSA-N	5-[(4-bromo-3,5-dimethoxyphenyl)methyl]pyrimidine-2,4-diamine	C13H15BrN4O2	4	2	4	0	0	2	2.01147	96.28	4	2	339.193	Brc1c(OC)cc(cc1OC)Cc1cnc(nc1N)N	Pharmacologic Actions;Chemical Actions and Uses;Enzyme Inhibitors;Molecular Mechanisms of Pharmacological Action;Anti-Infective Agents;Folic Acid Antagonists;Therapeutic Uses	Brodimoprim;Bromdimoprim;Brodimoprima;Brodimoprime;Brodimoprimum;Ro 10-5970;56518-41-3;Brodimoprime [INN-French];Brodimoprimum [INN-Latin];Brodimoprima [INN-Spanish];Ro-10-5970;Brodimoprim (INN);Brodimoprim [INN];EINECS 260-238-8;Ro 105970;BRN 0760113;5-((4-Bromo-3,5-dimethoxyphenyl)methyl)-2,4-pyrimidinediamine;2,4-Pyrimidinediamine, 5-((4-bromo-3,5-dimethoxyphenyl)methyl)-;Hyprim;UNII-V1YC7T6LL…	Anti-infective agents;Whole Molecule;Drug / Therapeutic Agent;"<a href=""http://ctd.mdibl.org/detail.go?view=disease&type=chem&acc=C037079"">Diseases</a>";Pyrimidines;on human health by curating chemical-gene/protein interactions and chemical- and gene-disease relationships from;InChIKey: BFCRRLMMHNLSCP-UHFFFAOYSA-N;the literature. Click on these links to find specific, curated data for this chem…
99	Antibacterial		213043	Iclaprim	Diaminopyrimidine	Miscellaneous	Antifolate	InChI=1S/C19H22N4O3/c1-24-15-8-11(7-12-9-22-19(21)23-18(12)20)13-5-6-14(10-3-4-10)26-16(13)17(15)25-2/h5-6,8-10,14H,3-4,7H2,1-2H3,(H4,20,21,22,23)	HWJPWWYTGBZDEG-UHFFFAOYSA-N	5-[(2-cyclopropyl-7,8-dimethoxy-2H-chromen-5-yl)methyl]pyrimidine-2,4-diamine	C19H22N4O3	5	2	5	0	0	4	2.43317	105.51	4	3	354.41	O1c2c(C=CC1C1CC1)c(cc(OC)c2OC)Cc1cnc(nc1N)N	Chemical Actions and Uses;Enzyme Inhibitors;Molecular Mechanisms of Pharmacological Action;Folic Acid Antagonists;Pharmacologic Actions	Iclaprim;AR-100;Mersarex;Iclaprim [INN];Iclaprim (USAN/INN);AC1Q4WM5;UNII-42445HUU0O;AC1L4U54;CHEMBL134561;192314-93-5;RO-48-2622;AR-101;AR-102;AR-1G6498;AR-100.001;5-[(2-cyclopropyl-7,8-dimethoxy-2h-chromen-5-yl)methyl]pyrimidine-2,4-diamine;D08337;2,4-Pyrimidinediamine, 5-[(2-cyclopropyl-7,8-dimethoxy-2H-1-benzopyran-5-yl)methyl]-;5-((2RS)-2-cyclopropyl-7,8-dimethoxy-2H-chromen-5-ylmethyl)pyrim…	Dihydrofolate Inhibitor;Pyrimidines;InChIKey: HWJPWWYTGBZDEG-UHFFFAOYSA-N;5-[(2-cyclopropyl-7,8-dimethoxy-2H-chromen-5-yl)methyl]pyrimidine-2,4-diamine;Whole Molecule;NIAID ChemDB HIV, Opportunistic Infections and Tuberculosis Therapeutics Database;ATC code: J01EA03;Activity: Antibiotic;Antibacterial;Benzopyrans
100	Antibacterial	DB01190	446598	Clindamycin	Lincosamide	Miscellaneous	50S Ribosome	InChI=1S/C18H33ClN2O5S/c1-5-6-10-7-11(21(3)8-10)17(25)20-12(9(2)19)16-14(23)13(22)15(24)18(26-16)27-4/h9-16,18,22-24H,5-8H2,1-4H3,(H,20,25)/t9-,10+,11-,12+,13-,14+,15+,16+,18+/m0/s1	KDLRVYVGXIQJDK-AWPVFWJPSA-N	(2S,4R)-N-[(1S,2S)-2-chloro-1-[(2R,3R,4S,5R,6R)-3,4,5-trihydroxy-6-methylsulfanyloxan-2-yl]propyl]-1-methyl-4-propylpyrrolidine-2-carboxamide	C18H33ClN2O5S	5	4	8	0	0	2	-1.0276	103.46	2	5	425.998	ClC(C(NC(=O)C1[NH+](CC(C1)CCC)C)C1OC(SC)C(O)C(O)C1O)C	Chemical Actions and Uses;Enzyme Inhibitors;Molecular Mechanisms of Pharmacological Action;Therapeutic Uses;Pharmacologic Actions;Protein Synthesis Inhibitors;Anti-Bacterial Agents;Anti-Infective Agents	clindamycin;Cleocin;Dalacine;18323-44-9;58207-19-5;Clindamycin & VRC3375;AC1L9JV8;CLINDA & IL-12;BIDD:GT0418;Clindamycin & Interleukin 12;HMS2089A05;HMS2089N16;(2S,4R)-N-[(1S,2S)-2-chloranyl-1-[(2R,3R,4S,5R,6R)-6-methylsulfanyl-3,4,5-tris(oxidanyl)oxan-2-yl]propyl]-1-methyl-4-propyl-pyrrolidine-2-carboxamide;(2S,4R)-N-[(1S,2S)-2-chloro-1-[(2R,3R,4S,5R,6R)-3,4,5-trihydroxy-6-(methylthio)-2-oxanyl]…	(2S,4R)-N-[(1S,2S)-2-chloranyl-1-[(2R,3R,4S,5R,6R)-6-methylsulfanyl-3,4,5-tris(oxidanyl)oxan-2-yl]propyl]-1-methyl-4-propyl-pyrrolidine-2-carboxamide;BIOMOL:A-190;BIOMOL:DL-102;Combinations;Crystal Structure Of Clindamycin Bound To The G2099a Mutant 50s Ribosomal Subunit Of Haloarcula Marismortui;Crystal Structure Of Clindamycin Bound To The G2099a Mutant 50s Ribosomal Subunit Of Haloarcula Maris…
101	Antibacterial	DB01627	3000540	Lincomycin	Lincosamide	Miscellaneous	50S Ribosome	InChI=1S/C18H34N2O6S/c1-5-6-10-7-11(20(3)8-10)17(25)19-12(9(2)21)16-14(23)13(22)15(24)18(26-16)27-4/h9-16,18,21-24H,5-8H2,1-4H3,(H,19,25)/t9-,10-,11+,12-,13+,14-,15-,16-,18-/m1/s1	OJMMVQQUTAEWLP-KIDUDLJLSA-N	(2S,4R)-N-[(1R,2R)-2-hydroxy-1-[(2R,3R,4S,5R,6R)-3,4,5-trihydroxy-6-methylsulfanyloxan-2-yl]propyl]-1-methyl-4-propylpyrrolidine-2-carboxamide	C18H34N2O6S	6	5	8	1	1	2	-2.2741	123.69	2	6	407.552	S(C)C1OC(C(NC(=O)C2[NH+](CC(C2)CCC)C)C(O)C)C(O)C(O)C1O	Anti-Infective Agents;Anti-Bacterial Agents;Pharmacologic Actions;Chemical Actions and Uses;Enzyme Inhibitors;Molecular Mechanisms of Pharmacological Action;Therapeutic Uses;Protein Synthesis Inhibitors	lincomycin;AC1MHD7X;Lincomycin (USAN/INN);CHEMBL1447;Lincomycin, (2S-cis)-Isomer;154-21-2;STOCK1N-50613;C18H34N2O6S;HMS2089A13;NSC70731;SMP1_000178;NCGC00159326-02;LS-174532;C06812;D00223;Cillimycin;Epilincomycin;Lincolcina;Lincomycine;Lincomyocin;Lincocin;Lincocine;Lincorex;Lincomix;Mycivin;AC1NTUSE;AC1OFCLC;AC1OFCLI;AC1OFCLO;Spectrum_000883;AC1LCV3Y;AC1LV2ZC;AC1LWJX1;AC1NWAO9;AC1O7GCP;AC1OFCL6;…	ISOLATED FROM STREPTOMYCES LINCOLNENSIS; OR HYDROCHLORIDE SALT;(2S,4R)-1-methyl-N-[(1R,2R)-1-[(2R,3R,4S,5R,6R)-6-methylsulfanyl-3,4,5-tris(oxidanyl)oxan-2-yl]-2-oxidanyl-propyl]-4-propyl-pyrrolidine-2-carboxamide;"Substance included in EPA DSSTox FDAMDD: FDA Maximum (Recommended) Daily Dose Database File <a href=""http://www.epa.gov/ncct/dsstox/sdf_fdamdd.html""target=""_blank"">[link to DSSTox S…
102	Antibacterial	DB00199	12560	Erythromycin	Macrolide	Macrolide	50S Ribosome	InChI=1S/C37H67NO13/c1-14-25-37(10,45)30(41)20(4)27(39)18(2)16-35(8,44)32(51-34-28(40)24(38(11)12)15-19(3)47-34)21(5)29(22(6)33(43)49-25)50-26-17-36(9,46-13)31(42)23(7)48-26/h18-26,28-32,34,40-42,44-45H,14-17H2,1-13H3/t18-,19-,20+,21+,22-,23+,24+,25-,26+,28-,29+,30-,31+,32-,34+,35-,36-,37-/m1/s1	ULGZDMOVFRHVEP-RWJQBGPGSA-N	(3R,4S,5S,6R,7R,9R,11R,12R,13S,14R)-6-[(2S,3R,4S,6R)-4-(dimethylamino)-3-hydroxy-6-methyloxan-2-yl]oxy-14-ethyl-7,12,13-trihydroxy-4-[(2R,4R,5S,6S)-5-hydroxy-4-methoxy-4,6-dimethyloxan-2-yl]oxy-3,5,7,9,11,13-hexamethyl-oxacyclotetradecane-2,10-dione	C37H67NO13	12	5	7	3	4	3	0.3685	195.11	1	13	734.945	O1C(CC)C(O)(C)C(O)C(C)C(=O)C(CC(O)(C)C(OC2OC(CC([NH+](C)C)C2O)C)C(C)C(OC2OC(C)C(O)C(OC)(C2)C)C(C)C1=O)C	Anti-Bacterial Agents;Pharmacologic Actions;Protein Synthesis Inhibitors;Anti-Infective Agents;Chemical Actions and Uses;Enzyme Inhibitors;Gastrointestinal Agents;Molecular Mechanisms of Pharmacological Action;Therapeutic Uses	erythromycin;Erythromycin A;erythro;Abomacetin;Erymax;Emgel;Eritromicina;Erythromycine;Erythromycinum;Ilotycin;Robimycin;Benzamycin;IndermRetcin;CHEBI:42355;E-Mycin;Ery-Sol;Torlamicina;Abboticin;Staticin (TN);Akne-mycin (TN);Prestwick_205;Erygel (TN);N-Methylerythromycin A;Eryc (TN);T-stat (TN);Spectrum_000115;Spectrum_000659;Pce (TN);AC1L1ZUR;Prestwick3_000151;Spectrum2_000759;Spectrum2_001263;S…	Publication Date: 2011-03-09;The Crystal Structure Of Macrolide Glycosyltransferases: A Blueprint For Antibiotic Engineering;Patent Number: EP2311814A1;RibosomeANTIBIOTIC;Classifications: C07D401/04, C07D401/14, C07D403/04, C07D403/14, C07D471/04, C07D487/04;"<a href=""http://worldwide.espacenet.com/publicationDetails/biblio?FT=D&CC=EP&NR=2292608A1&KC=A1"">Intermediates for the preparation of sub…
103	Antibacterial	DB00207	447043	Azithromycin	Macrolide	Macrolide	50S Ribosome	InChI=1S/C38H72N2O12/c1-15-27-38(10,46)31(42)24(6)40(13)19-20(2)17-36(8,45)33(52-35-29(41)26(39(11)12)16-21(3)48-35)22(4)30(23(5)34(44)50-27)51-28-18-37(9,47-14)32(43)25(7)49-28/h20-33,35,41-43,45-46H,15-19H2,1-14H3/t20-,21-,22+,23-,24-,25+,26+,27-,28+,29-,30+,31-,32+,33-,35+,36-,37-,38-/m1/s1	MQTOSJVFKKJCRP-BICOPXKESA-N	(2R,3S,4R,5R,8R,10R,11R,12S,13S,14R)-11-[(2S,3R,4S,6R)-4-(dimethylamino)-3-hydroxy-6-methyloxan-2-yl]oxy-2-ethyl-3,4,10-trihydroxy-13-[(2R,4R,5S,6S)-5-hydroxy-4-methoxy-4,6-dimethyloxan-2-yl]oxy-3,5,6,8,10,12,14-heptamethyl-1-oxa-6-azacyclopentadecan-15-one	C38H72N2O12	11	5	7	3	4	3	-0.9335	182.48	2	12	751.012	O1C(CC)C(O)(C)C(O)C([NH+](CC(CC(O)(C)C(OC2OC(CC([NH+](C)C)C2O)C)C(C)C(OC2OC(C)C(O)C(OC)(C2)C)C(C)C1=O)C)C)C	Anti-Bacterial Agents;Anti-Infective Agents;Chemical Actions and Uses;Pharmacologic Actions;Therapeutic Uses	azithromycin;Zithromax;Zmax;CP-62993;Aritromicina;Azithromycine;Azithromycinum;Sumamed;Zitromax;CHEBI:2955;XZ-450;Azythromycin;Zithromycin;Azifast;Azigram;Azimakrol;Azitromin;Zentavion;Zithromac;83905-01-5;Azithromycin (AIDS Initiative);DRG-0104;Zitromax Avium 600;Spectrum_000307;Azithromycin (anhydrous);AC1L9KEG;DCH3;Spectrum2_001582;Spectrum3_000653;Spectrum4_000186;Spectrum5_001867;CHEMBL529;B…	InterBioScreen:STOCK1N-66044;PDB Accession Code 1M1K;Applicant(s): CHEMOCENTRYX INC [US];MLSMR_SAMPLE_SUPPLIER: RTI International for NIEHS National Toxicology Program;Complex Of The Large Ribosomal Subunit From Deinococcus Radiodurans With Azithromycin;Applicant(s): UNIV WASHINGTON [US], NOVARTIS VACCINES & DIAGNOSTIC [US];MLSMR_COMPOUND_CLASS: SS;"<a href=""http://www.tci-india.com/catalog/A207…
104	Antibacterial	DB00778	9567573	Roxithromycin	Macrolide	Macrolide	50S Ribosome	InChI=1S/C41H76N2O15/c1-15-29-41(10,49)34(45)24(4)31(42-53-21-52-17-16-50-13)22(2)19-39(8,48)36(58-38-32(44)28(43(11)12)18-23(3)54-38)25(5)33(26(6)37(47)56-29)57-30-20-40(9,51-14)35(46)27(7)55-30/h22-30,32-36,38,44-46,48-49H,15-21H2,1-14H3/b42-31+/t22-,23?,24+,25+,26-,27?,28?,29-,30?,32?,33+,34-,35?,36-,38?,39-,40?,41-/m1/s1	RXZBMPWDPOLZGW-KMAKEOJNSA-N	(3R,4S,5S,6R,7R,9R,10E,11S,12R,13S,14R)-6-[4-(dimethylamino)-3-hydroxy-6-methyloxan-2-yl]oxy-14-ethyl-7,12,13-trihydroxy-4-(5-hydroxy-4-methoxy-4,6-dimethyloxan-2-yl)oxy-10-(2-methoxyethoxymethoxyimino)-3,5,7,9,11,13-hexamethyl-oxacyclotetradecan-2-one	C41H76N2O15	14	5	13	3	4	3	0.7925	218.09	2	15	838.066	O1C(CC)C(O)(C)C(O)C(C)C(=NOCOCCOC)C(CC(O)(C)C(OC2OC(CC([NH+](C)C)C2O)C)C(C)C(OC2OC(C)C(O)C(OC)(C2)C)C(C)C1=O)C	Chemical Actions and Uses;Pharmacologic Actions;Anti-Bacterial Agents;Anti-Infective Agents;Therapeutic Uses	roxithromycin;Roxithromycine;Roxithromycinum;Roxitromicina;Roxithromycine [French];Roxithromycinum [Latin];Roxitromicina [Spanish];RU 28965;CCRIS 3461;9-(O-((2-Methoxyethoxy)methyl)oxime)erythromycin;BRN 4286925;Rulide;Erythromycin, 9-(O-((2-methoxyethoxy)methyl)oxime);Erythromycin, 9-(O-((2-methoxyethoxy)methyl)oxime), (9E)-;Prestwick_1046;80214-83-1;Prestwick2_000854;Roxithromycin [USAN:INN:JAN…	Anti-Bacterial Agents;Anti-Infective Agents;COMBINATION;Combinations;NIAID ChemDB HIV, Opportunistic Infections and Tuberculosis Therapeutics Database;Prestwick:854
105	Antibacterial	DB00954	6473883	Dirithromycin	Macrolide	Macrolide	50S Ribosome	InChI=1S/C42H78N2O14/c1-15-29-42(10,49)37-24(4)32(43-30(56-37)21-52-17-16-50-13)22(2)19-40(8,48)36(58-39-33(45)28(44(11)12)18-23(3)53-39)25(5)34(26(6)38(47)55-29)57-31-20-41(9,51-14)35(46)27(7)54-31/h22-37,39,43,45-46,48-49H,15-21H2,1-14H3/t22-,23-,24+,25+,26-,27+,28+,29-,30-,31+,32+,33-,34+,35+,36-,37-,39+,40-,41-,42-/m1/s1	WLOHNSSYAXHWNR-DWIOZXRMSA-N	(1S,2R,4R,5R,6S,7S,8R,11R,12R,13R,15R,17S)-5-[(2S,3R,4S,6R)-4-(dimethylamino)-3-hydroxy-6-methyloxan-2-yl]oxy-11-ethyl-4,12-dihydroxy-7-[(2R,4R,5S,6S)-5-hydroxy-4-methoxy-4,6-dimethyloxan-2-yl]oxy-15-(2-methoxyethoxymethyl)-2,4,6,8,12,17-hexamethyl-10,14-dioxa-16-azabicyclo[11.3.1]heptadecan-9-one	C42H78N2O14	13	4	12	3	4	4	-0.2416	202.11	2	14	837.102	O1C(CC)C(O)(C2OC([NH2+]C(C2C)C(CC(O)(C)C(OC2OC(CC([NH+](C)C)C2O)C)C(C)C(OC2OC(C)C(O)C(OC)(C2)C)C(C)C1=O)C)COCCOC)C	Anti-Infective Agents;Chemical Actions and Uses;Therapeutic Uses;Anti-Bacterial Agents;Pharmacologic Actions	Dirithromycin;Dirithromycine;Dirithromycinum;Diritromicina;LY-237216;Divitross;Noriclan;Valodin;Dynabac (TN);62013-04-1;Spectrum_001476;SpecPlus_000868;Prestwick3_000557;Spectrum2_001655;Spectrum3_001630;Spectrum4_000597;Spectrum5_000715;Dirithromycin (USP/INN);AC1O6F4R;BSPBio_000633;BSPBio_003299;KBioGR_001094;KBioSS_001956;MLS000028564;MLS001074061;DivK1c_006964;SPECTRUM1504144;SPBio_001809;Amb…	MLSMR_SAMPLE_SUPPLIER: Sigma Chemical Company;Activity: Antibacterial;ATC code: J01FA13;Sigma Chemical Company:D4065;Macrolides;Mycins;NINDS:1504144;Microsource:1504144;Prestwick:557;(1S,2R,4R,5R,6S,7S,8R,11R,12R,13R,15R,17S)-5-[(2S,3R,4S,6R)-4-(dimethylamino)-6-methyl-3-oxidanyl-oxan-2-yl]oxy-11-ethyl-7-[(2R,4R,5S,6S)-4-methoxy-4,6-dimethyl-5-oxidanyl-oxan-2-yl]oxy-15-(2-methoxyethoxymethyl)-2,4…
106	Antibacterial	DB00976	3002190	Telithromycin	Macrolide	Macrolide	50S Ribosome	InChI=1S/C43H65N5O10/c1-12-33-43(8)37(48(41(53)58-43)19-14-13-18-47-23-31(45-24-47)30-16-15-17-44-22-30)27(4)34(49)25(2)21-42(7,54-11)38(28(5)35(50)29(6)39(52)56-33)57-40-36(51)32(46(9)10)20-26(3)55-40/h15-17,22-29,32-33,36-38,40,51H,12-14,18-21H2,1-11H3/t25-,26-,27+,28+,29-,32+,33-,36-,37-,38-,40+,42-,43-/m1/s1	LJVAJPDWBABPEJ-PNUFFHFMSA-N	(1R,2R,4R,6R,7R,8R,10R,13R,14S)-7-[(2S,3R,4S,6R)-4-(dimethylamino)-3-hydroxy-6-methyloxan-2-yl]oxy-13-ethyl-6-methoxy-2,4,6,8,10,14-hexamethyl-17-[4-(4-pyridin-3-ylimidazol-1-yl)butyl]-12,15-dioxa-17-azabicyclo[12.3.0]heptadecane-3,9,11,16-tetrone	C43H65N5O10	10	1	11	2	3	5	3.7785	173.05	5	10	813.026	O1C(CC)C2(OC(=O)N(C2C(C)C(=O)C(CC(OC)(C)C(OC2OC(CC([NH+](C)C)C2O)C)C(C)C(=O)C(C)C1=O)C)CCCCn1cc(nc1)-c1cccnc1)C	Telithromycin;Ketek;Levviax;AC1MHE79;CHEMBL1136;191114-48-4;HMR3647;HMR 3647;HMR-3647;RU66647;173838-31-8;RU 66647;RU-66647;(1R,2R,4R,6R,7R,8R,10R,13R,14S)-7-[(2S,3R,4S,6R)-4-(dimethylamino)-3-hydroxy-6-methyloxan-2-yl]oxy-13-ethyl-6-methoxy-2,4,6,8,10,14-hexamethyl-17-[4-(4-pyridin-3-ylimidazol-1-yl)butyl]-12,15-dioxa-17-azabicyclo[12.3.0]heptadecane-3,9,11,16-tetrone;11,12-Dideoxy-3-des(2,6-did…	Mycins;NIAID ChemDB HIV, Opportunistic Infections and Tuberculosis Therapeutics Database;PDB Accession Code 3OI5;Ribosome;Structure Of The Thermus Thermophilus 70s Ribosome Complexed With Telithromycin. This File Contains The 50s Subunit Of One 70s Ribosome. The Entire Crystal Structure Contains Two 70s Ribosomes.;RibosomeANTIBIOTIC;Macrolides;(1R,2R,4R,6R,7R,8R,10R,13R,14S)-7-[(2S,3R,4S,6R)-4-(d…	Anti-Bacterial Agents;Pharmacologic Actions;Chemical Actions and Uses;Anti-Infective Agents;Therapeutic Uses
107	Antibacterial	DB01211	5284534	Clarithromycin	Macrolide	Macrolide	50S Ribosome	InChI=1S/C38H69NO13/c1-15-26-38(10,45)31(42)21(4)28(40)19(2)17-37(9,47-14)33(52-35-29(41)25(39(11)12)16-20(3)48-35)22(5)30(23(6)34(44)50-26)51-27-18-36(8,46-13)32(43)24(7)49-27/h19-27,29-33,35,41-43,45H,15-18H2,1-14H3/t19-,20-,21+,22?,23-,24+,25+,26-,27+,29-,30+,31-,32+,33-,35+,36-,37-,38-/m1/s1	AGOYDEPGAOXOCK-LERDGGEFSA-N	(3R,4S,6R,7R,9R,11R,12R,13S,14R)-6-[(2S,3R,4S,6R)-4-(dimethylamino)-3-hydroxy-6-methyloxan-2-yl]oxy-14-ethyl-12,13-dihydroxy-4-[(2R,4R,5S,6S)-5-hydroxy-4-methoxy-4,6-dimethyloxan-2-yl]oxy-7-methoxy-3,5,7,9,11,13-hexamethyl-oxacyclotetradecane-2,10-dione	C38H69NO13	12	4	8	2	3	3	1.0226	184.11	1	13	748.972	O1C(CC)C(O)(C)C(O)C(C)C(=O)C(CC(OC)(C)C(OC2OC(CC([NH+](C)C)C2O)C)C(C)C(OC2OC(C)C(O)C(OC)(C2)C)C(C)C1=O)C	Chemical Actions and Uses;Enzyme Inhibitors;Molecular Mechanisms of Pharmacological Action;Pharmacologic Actions;Therapeutic Uses;Anti-Bacterial Agents;Anti-Infective Agents;Protein Synthesis Inhibitors	clarithromycin;AC1NR4MY;6-{[(2S,3R,4S,6R)-4-(dimethylamino)-3-hydroxy-6-methyltetrahydro-2H-pyran-2-yl]oxy}-14-ethyl-12,13-dihydroxy-4-{[(2R,4R,5S,6S)-5-hydroxy-4-methoxy-4,6-dimethyltetrahydro-2H-pyran-2-yl]oxy}-7-methoxy-3,5,7,9,11,13-hexamethyloxacyclotetradecane-2,10-dione;81103-11-9;(3R,4S,6R,7R,9R,11R,12R,13S,14R)-6-[(2S,3R,4S,6R)-4-(dimethylamino)-3-hydroxy-6-methyloxan-2-yl]oxy-14-ethyl-1…	(3R,4S,6R,7R,9R,11R,12R,13S,14R)-6-[(2S,3R,4S,6R)-4-(dimethylamino)-6-methyl-3-oxidanyl-oxan-2-yl]oxy-14-ethyl-7-methoxy-4-[(2R,4R,5S,6S)-4-methoxy-4,6-dimethyl-5-oxidanyl-oxan-2-yl]oxy-3,5,7,9,11,13-hexamethyl-12,13-bis(oxidanyl)-1-oxacyclotetradecane-2,10-dione;"For further information visit GEO Series Microarray Experiment Accession ID GSE8858 <a href=""http://www.ncbi.nlm.nih.gov/geo/query/ac…
108	Antibacterial	DB01321	5284579	Josamycin	Macrolide	Macrolide	50S Ribosome	InChI=1S/C42H69NO15/c1-23(2)19-32(47)56-40-27(6)53-34(22-42(40,8)50)57-37-26(5)54-41(36(49)35(37)43(9)10)58-38-29(17-18-44)20-24(3)30(46)16-14-12-13-15-25(4)52-33(48)21-31(39(38)51-11)55-28(7)45/h12-14,16,18,23-27,29-31,34-41,46,49-50H,15,17,19-22H2,1-11H3/b13-12+,16-14+/t24-,25-,26-,27+,29+,30+,31-,34+,35-,36-,37-,38+,39?,40-,41+,42-/m1/s1	XJSFLOJWULLJQS-HTYUZQQASA-N	[(2S,3R,4R,6S)-6-[(2R,3S,4R,5R,6S)-6-[[(4R,6S,7R,9R,10R,11E,13E,16R)-4-acetyloxy-10-hydroxy-5-methoxy-9,16-dimethyl-2-oxo-7-(2-oxoethyl)-1-oxacyclohexadeca-11,13-dien-6-yl]oxy]-4-(dimethylamino)-5-hydroxy-2-methyloxan-3-yl]oxy-4-hydroxy-2,4-dimethyloxan-3-yl] 3-methylbutanoate	C42H69NO15	12	3	14	2	3	3	1.5963	207.25	1	15	829.014	O1C(C)C(OC2OC(C)C(OC(=O)CC(C)C)C(O)(C2)C)C([NH+](C)C)C(O)C1OC1C(OC)C(OC(=O)C)CC(OC(CC=CC=CC(O)C(CC1CC=O)C)C)=O	Therapeutic Uses;Chemical Actions and Uses;Anti-Bacterial Agents;Anti-Infective Agents;Pharmacologic Actions	josamycin;AC1NR4PM;4-(acetyloxy)-6-((3,6-dideoxy-4-O-(2,6-dideoxy-3-C-methyl-4-O-(3-methyl-1-oxobutyl)-alpha-L-ribo-hexopyranosyl)-3-(dimethylamino)-beta-D-glucopyranosyl)oxy)-10-hydroxy-5-methoxy-9,16-dimethyl-2-oxooxacyclohexadeca-11,13-diene-7-acetaldehyde;16846-24-5;[(2S,3R,4R,6S)-6-[(2R,3S,4R,5R,6S)-6-[[(4R,6S,7R,9R,10R,11E,13E,16R)-4-acetyloxy-10-hydroxy-5-methoxy-9,16-dimethyl-2-oxo-7-(2-o…	[(2S,3R,4R,6S)-6-[(2R,3S,4R,5R,6S)-6-[[(4R,6S,7R,9R,10R,11E,13E,16R)-4-acetyloxy-5-methoxy-9,16-dimethyl-10-oxidanyl-2-oxidanylidene-7-(2-oxidanylideneethyl)-1-oxacyclohexadeca-11,13-dien-6-yl]oxy]-4-(dimethylamino)-2-methyl-5-oxidanyl-oxan-3-yl]oxy-2,4-dimethyl-4-oxidanyl-oxan-3-yl] 3-methylbutanoate;"For further information visit the CPDB Source <a href=""http://potency.berkeley.edu/chempages/J…
109	Antibacterial	DB01361	202225	Troleandomycin	Macrolide	Macrolide	50S Ribosome	InChI=1S/C41H67NO15/c1-19-17-41(18-49-41)38(46)23(5)34(53-27(9)43)21(3)25(7)52-39(47)24(6)35(56-32-16-31(48-14)36(26(8)51-32)54-28(10)44)22(4)33(19)57-40-37(55-29(11)45)30(42(12)13)15-20(2)50-40/h19-26,30-37,40H,15-18H2,1-14H3/t19-,20+,21-,22+,23+,24+,25+,26-,30-,31-,32-,33-,34-,35-,36-,37+,40-,41+/m0/s1	LQCLVBQBTUVCEQ-QTFUVMRISA-N	[(14R,15R,16S,17S,18R,21R,22S,23R,24S,25S)-24-[(2S,3R,4S,6R)-3-acetyloxy-4-(dimethylamino)-6-methyloxan-2-yl]oxy-22-[(2R,4S,5S,6S)-5-acetyloxy-4-methoxy-6-methyloxan-2-yl]oxy-15,17,18,21,23,25-hexamethyl-14,20-dioxo-1,19-dioxaspiro[2.13]hexadecan-16-yl] acetate	C41H67NO15	11	0	12	2	3	4	2.2038	185.39	1	15	814.987	O1C(C)C(C)C(OC(=O)C)C(C)C(=O)C2(OC2)CC(C)C(OC2OC(CC([NH+](C)C)C2OC(=O)C)C)C(C)C(OC2OC(C)C(OC(=O)C)C(OC)C2)C(C)C1=O	TROLEANDOMYCIN;Triacetyloleandomycin;Tao (TN);Prestwick3_000036;Troleandomycin (USP/INN);Triacetyloleandomycin (JAN);Cyclamycin;Evramicina;Matromicina;Oleandocetine;Treolmicina;Tribiocillina;BSPBio_000131;AC1L483V;CHEMBL564085;BPBio1_000145;HMS2089B10;LMPK04000042;DB01361;Oleandomycin triacetate;NCGC00179654-01;AB00513798;FT-0082364;C12753;D01322;Oleandomycin triacetyl ester;Oleandocetin;Oleandom…	Co-Crystal Structure Of Triacetyloleandomcyin Bound To The Large Ribosomal Subunit;Enzyme: CYP3A4;"Same as: <a href=""http://pubchem.ncbi.nlm.nih.gov/summary/summary.cgi?sid=7848385"">D01322</a>";"Mechanism of action: Troleandomycin acts by penetrating the bacterial cell membrane and reversibly binding to the 50 S subunit of bacterial ribosomes or near the ""P"" or donor site so that binding of t…	Anti-Bacterial Agents;Pharmacologic Actions;Anti-Infective Agents;Therapeutic Uses;Chemical Actions and Uses
110	Antibacterial	DB04805	122731	Virginiamycin factor S1	Macrolide	Macrolide	50S Ribosome	InChI=1S/C43H49N7O10/c1-4-29-40(56)49-21-12-17-30(49)41(57)48(3)32(23-26-13-7-5-8-14-26)42(58)50-22-19-28(51)24-31(50)37(53)47-35(27-15-9-6-10-16-27)43(59)60-25(2)34(38(54)45-29)46-39(55)36-33(52)18-11-20-44-36/h5-11,13-16,18,20,25,29-32,34-35,52H,4,12,17,19,21-24H2,1-3H3,(H,45,54)(H,46,55)(H,47,53)	FEPMHVLSLDOMQC-UHFFFAOYSA-N		C43H49N7O10	10	4	7	2	4	6	1.29947	224.72	7	10	823.904	O1C(C)C(NC(=O)c2ncccc2O)C(=O)NC(CC)C(=O)N2C(CCC2)C(=O)N(C)C(Cc2ccccc2)C(=O)N2C(CC(=O)CC2)C(=O)NC(c2ccccc2)C1=O	Virginiamycin S1;Virginiamycin factor S;NSC177858;23152-29-6;n-(22-benzyl-6-ethyl-10,23-dimethyl-5,8,12,15,17,21,24-heptaoxo-13-phenyldocosahydro-12h-pyrido[2,1-f]pyrrolo[2,1-l][1,4,7,10,13,16]oxapentaazacyclononadecin-9-yl)-3-hydroxypyridine-2-carboxamide;Staphylomycin S;Staphylomycin S1;Antibiotic 1754Z3B;Virginiamycin factor S1;Glycine, .rho.-lactone;AC1Q6O3R;VirginiamycinVirginiamycin S1;AC1L…	DTP/NCI DIS cdk 1.4.4. Release-October 2011.;Deposition record created from database Chemistry on host DrZZLaptop on Oct 30, 2011;Structure Evaluation:Consistent with Molecular Formula.
111	Antibacterial		14750	Pediamycin	Macrolide	Macrolide	50S Ribosome	InChI=1S/C43H75NO16/c1-15-29-43(11,52)36(48)24(5)33(47)22(3)20-41(9,51)38(25(6)34(26(7)39(50)57-29)59-32-21-42(10,53-14)37(49)27(8)56-32)60-40-35(28(44(12)13)19-23(4)55-40)58-31(46)18-17-30(45)54-16-2/h22-29,32,34-38,40,48-49,51-52H,15-21H2,1-14H3/t22-,23+,24+,25+,26-,27+,28-,29-,32+,34+,35+,36-,37+,38-,40-,41-,42-,43-/m1/s1	NSYZCCDSJNWWJL-HEESAXMSSA-N	4-O-[(2R,3S,4R,6S)-4-(dimethylamino)-2-[[(3R,4S,5S,6R,7R,9R,11R,12R,13S,14R)-14-ethyl-7,12,13-trihydroxy-4-[(2R,4R,5S,6S)-5-hydroxy-4-methoxy-4,6-dimethyloxan-2-yl]oxy-3,5,7,9,11,13-hexamethyl-2,10-dioxo-oxacyclotetradec-6-yl]oxy]-6-methyloxan-3-yl] 1-O-ethyl butanedioate	C43H75NO16	13	4	14	2	3	3	1.2627	227.48	1	16	863.072	O1C(CC)C(O)(C)C(O)C(C)C(=O)C(CC(O)(C)C(OC2OC(CC([NH+](C)C)C2OC(=O)CCC(OCC)=O)C)C(C)C(OC2OC(C)C(O)C(OC)(C2)C)C(C)C1=O)C	Anti-Bacterial Agents;Anti-Infective Agents;Chemical Actions and Uses;Enzyme Inhibitors;Gastrointestinal Agents;Molecular Mechanisms of Pharmacological Action;Pharmacologic Actions;Protein Synthesis Inhibitors;Therapeutic Uses	Erythroped;EryPed;E-Mycin E;ERY-PED;Erythrocin ethyl succinate;PEDIAMYCIN 400;Erythromycin ethyl succinate;E.E.S;Erythromycin, ethyl succinate;HSDB 3075;Erythromycin, mono(ethyl succinate);EINECS 215-033-8;Erythromycin 2'-(ethyl butanedioate);EES Granules;Erythromycin, 2'-(ethyl butanedioate);BRN 0077638;EES (Antiobiotic);Erythromycin, mono(ethyl succinate) (ester);Succinic acid, monoethyl ester,…	Anti-Bacterial Agents;Anti-Infective Agents;Drug / Therapeutic Agent;Enzyme inhibitors;Gastrointestinal agents;Human Data;O4-[(2R,3S,4R,6S)-4-(dimethylamino)-2-[[(3R,4S,5S,6R,7R,9R,11R,12R,13S,14R)-14-ethyl-4-[(2R,4R,5S,6S)-4-methoxy-4,6-dimethyl-5-oxidanyl-oxan-2-yl]oxy-3,5,7,9,11,13-hexamethyl-7,12,13-tris(oxidanyl)-2,10-bis(oxidanylidene)-1-oxacyclotetradec-6-yl]oxy]-6-methyl-oxan-3-yl] O1-eth…
112	Antibacterial		71260	Flurithromycin	Macrolide	Macrolide	50S Ribosome	InChI=1S/C37H66FNO13/c1-14-24-37(10,46)29(42)21(5)28(41)34(7,38)17-35(8,45)31(52-33-26(40)23(39(11)12)15-18(2)48-33)19(3)27(20(4)32(44)50-24)51-25-16-36(9,47-13)30(43)22(6)49-25/h18-27,29-31,33,40,42-43,45-46H,14-17H2,1-13H3/t18-,19+,20-,21+,22+,23+,24-,25+,26-,27+,29-,30+,31-,33+,34+,35-,36-,37-/m1/s1	XOEUHCONYHZURQ-HNUBZJOYSA-N	(3R,4S,5S,6R,7R,9S,11R,12R,13S,14R)-6-[(2S,3R,4S,6R)-4-(dimethylamino)-3-hydroxy-6-methyloxan-2-yl]oxy-14-ethyl-9-fluoro-7,12,13-trihydroxy-4-[(2R,4R,5S,6S)-5-hydroxy-4-methoxy-4,6-dimethyloxan-2-yl]oxy-3,5,7,9,11,13-hexamethyl-oxacyclotetradecane-2,10-dione	C37H66FNO13	12	5	7	3	4	3	0.4606	195.11	1	13	752.935	FC1(CC(O)(C)C(OC2OC(CC([NH+](C)C)C2O)C)C(C)C(OC2OC(C)C(O)C(OC)(C2)C)C(C)C(OC(CC)C(O)(C)C(O)C(C)C1=O)=O)C	Chemical Actions and Uses;Enzyme Inhibitors;Molecular Mechanisms of Pharmacological Action;Pharmacologic Actions	Flurithromycin;8-Fluoroerythromycin;Fluritromicina;Antibiotic P 80206;Cl-932;Fluritromycinum [Latin];Flurithromycine [French];Fluritromicina [Spanish];Erythromycin, 8-fluoro-;(8S)-8-Fluoroerythromycin;P-0501A;(8S)-8-Fluoroerythromycin A;P 80206;CI-932;82664-20-8;Flurithromycin (INN);Flurithromycin [INN];flurythromycin;Flurithromicina;Flurithromycime;Flurithromycine;Fluritromycinum;Flurizic;Flurit…	(3R,4S,5S,6R,7R,9S,11R,12R,13S,14R)-6-[(2S,3R,4S,6R)-4-(dimethylamino)-6-methyl-3-oxidanyl-oxan-2-yl]oxy-14-ethyl-9-fluoranyl-4-[(2R,4R,5S,6S)-4-methoxy-4,6-dimethyl-5-oxidanyl-oxan-2-yl]oxy-3,5,7,9,11,13-hexamethyl-7,12,13-tris(oxidanyl)-1-oxacyclotetradecane-2,10-dione;Activity: Antibiotic, macrolide;ATC code: J01FA14;Drug / Therapeutic Agent;Enzyme Inhibitors;Macrolides;Mycins;NIAID ChemDB HIV…
113	Antibacterial		214964	Rutamycin	Macrolide	Macrolide	50S Ribosome	InChI=1S/C20H25N5O5P2/c1-2-20(26)16-13-17(21)15-25(14-16)32(28,24-11-12-24)30-19-5-3-18(4-6-19)29-31(27,22-7-8-22)23-9-10-23/h2-6,13-14H,1,7-12,15,21H2	ANTIVHHDTMXRCT-UHFFFAOYSA-N	1-[3-amino-1-[aziridin-1-yl-[4-[bis(aziridin-1-yl)phosphoryloxy]phenoxy]phosphoryl]-2H-pyridin-5-yl]prop-2-en-1-one	C20H25N5O5P2	8	1	10	0	3	5	0.264	107.96	5	5	477.398	P(Oc1ccc(OP(=O)(N2CC2)N2CC2)cc1)(=O)(N1CC(N)=CC(=C1)C(=O)C=C)N1CC1	Anti-Bacterial Agents;Pharmacologic Actions;Uncoupling Agents;Antifungal Agents;Chemical Actions and Uses;Enzyme Inhibitors;Molecular Mechanisms of Pharmacological Action;Therapeutic Uses;Anti-Infective Agents	A-272;34691-29-7;4-{[bis(aziridin-1-yl)phosphoryl]oxy}phenyl(5-acryloyl-3-aminopyridin-1(2h)-yl)aziridin-1-ylphosphinate(non-preferred name);Phosphonamidic acid, p-(1-aziridinyl)-N-(2-nicotinoylethyl)-, p-((bis(1-aziridinyl)phosphinyl)oxy)phenyl ester;AC1L4XV8;AC1Q5BI9;AR-1G0142;LS-106369;1-[3-amino-1-[aziridin-1-yl-[4-[bis(aziridin-1-yl)phosphoryloxy]phenoxy]phosphoryl]-2H-pyridin-5-yl]prop-2-en…	1-[3-azanyl-1-[aziridin-1-yl-[4-[bis(aziridin-1-yl)phosphoryloxy]phenoxy]phosphoryl]-2H-pyridin-5-yl]prop-2-en-1-one;Drug / Therapeutic Agent
114	Antibacterial		447451	Cethromycin	Macrolide	Macrolide	50S Ribosome	InChI=1S/C42H59N3O10/c1-11-32-42(8)36(44-40(50)55-42)25(4)33(46)23(2)21-41(7,51-18-14-15-28-20-29-16-12-13-17-30(29)43-22-28)37(26(5)34(47)27(6)38(49)53-32)54-39-35(48)31(45(9)10)19-24(3)52-39/h12-17,20,22-27,31-32,35-37,39,48H,11,18-19,21H2,1-10H3,(H,44,50)/b15-14+/t23-,24-,25+,26+,27-,31+,32-,35-,36-,37-,39+,41-,42-/m1/s1	PENDGIOBPJLVBT-ONLVEXIXSA-N	(1R,2R,4R,6R,7R,8R,10R,13R,14S)-7-[(2S,3R,4S,6R)-4-(dimethylamino)-3-hydroxy-6-methyloxan-2-yl]oxy-13-ethyl-2,4,6,8,10,14-hexamethyl-6-[(E)-3-quinolin-3-ylprop-2-enoxy]-12,15-dioxa-17-azabicyclo[12.3.0]heptadecane-3,9,11,16-tetrone	C42H59N3O10	9	2	8	2	3	5	3.6926	164.02	3	10	766.953	O1C(CC)C2(OC(=O)NC2C(C)C(=O)C(CC(OCC=Cc2cc3c(nc2)cccc3)(C)C(OC2OC(CC([NH+](C)C)C2O)C)C(C)C(=O)C(C)C1=O)C)C	Chemical Actions and Uses;Therapeutic Uses;Anti-Infective Agents;Anti-Bacterial Agents;Pharmacologic Actions	Cethromycin;Restanza;Abbott-195773;Cethromycin [USAN];ABT 773;AC1L9KVM;ABT-773;CHEMBL133924;CHEBI:40317;LS-187007;LS-187642;A-195773;A-195773.0;AC1NQZEX;(1R,2R,4R,6R,7R,8R,10R,13R,14S)-7-[(2S,3R,4S,6R)-4-(dimethylamino)-3-hydroxy-6-methyloxan-2-yl]oxy-13-ethyl-2,4,6,8,10,14-hexamethyl-6-[(E)-3-quinolin-3-ylprop-2-enoxy]-12,15-dioxa-17-azabicyclo[12.3.0]heptadecane-3,9,11,16-tetrone;(3aS,4R,7R,9R,…	Complex Of The Large Ribosomal Subunit From Deinococcus Radiodurans With Abt-773;Ribosome;Anti-Infective Agents;(1R,2R,4R,6R,7R,8R,10R,13R,14S)-7-[(2S,3R,4S,6R)-4-(dimethylamino)-6-methyl-3-oxidanyl-oxan-2-yl]oxy-13-ethyl-2,4,6,8,10,14-hexamethyl-6-[(E)-3-quinolin-3-ylprop-2-enoxy]-12,15-dioxa-17-azabicyclo[12.3.0]heptadecane-3,9,11,16-tetrone;Complex Of The Large Ribosomal Subunit From Deinococc…
115	Antibacterial		5282188	Miocamycin	Macrolide	Macrolide	50S Ribosome	InChI=1S/C45H71NO17/c1-13-34(50)59-33-23-36(52)55-26(4)18-16-15-17-19-32(58-29(7)48)25(3)22-31(20-21-47)41(42(33)54-12)62-44-39(53)38(46(10)11)40(27(5)57-44)61-37-24-45(9,63-30(8)49)43(28(6)56-37)60-35(51)14-2/h15-17,19,21,25-28,31-33,37-44,53H,13-14,18,20,22-24H2,1-12H3/b16-15+,19-17+/t25-,26-,27-,28+,31+,32+,33-,37+,38-,39-,40-,41+,42+,43+,44+,45-/m1/s1	GQNZGCARKRHPOH-RQIKCTSVSA-N	[(4R,5S,6S,7R,9R,10R,11E,13E,16R)-10-acetyloxy-6-[(2S,3R,4R,5S,6R)-5-[(2S,4R,5S,6S)-4-acetyloxy-4,6-dimethyl-5-propanoyloxyoxan-2-yl]oxy-4-(dimethylamino)-3-hydroxy-6-methyloxan-2-yl]oxy-5-methoxy-9,16-dimethyl-2-oxo-7-(2-oxoethyl)-1-oxacyclohexadeca-11,13-dien-4-yl] propanoate	C45H71NO17	12	1	18	2	3	3	2.4919	219.39	1	17	899.061	O1C(C)C(OC2OC(C)C(OC(=O)CC)C(OC(=O)C)(C2)C)C([NH+](C)C)C(O)C1OC1C(OC)C(OC(=O)CC)CC(OC(CC=CC=CC(OC(=O)C)C(CC1CC=O)C)C)=O	Anti-Infective Agents;Therapeutic Uses;Chemical Actions and Uses;Anti-Bacterial Agents;Pharmacologic Actions	Miocamycin;midecamycin acetate;Miokamycin;Ponsinomycin;Acecamycin;3'',9-Diacetylmydecamycin;9,3''-Diacetylmidecamycin;EINECS 259-879-6;55881-07-7;Leucomycin V, 3B,9-diacetate 3,4B-dipropanoate;MOM;Leucomycin V, 3(sup B),9-diacetate 3,4(sup B)-dipropanoate;Miocamycine;Myocamicin;Macroral;Miocamen;Mosil;Miocamycin (TN);AC1NQZMS;Midecamycin acetate (JP16);9,3''-Di-O-Acetylmidecamycin;C45H71NO17;1532…	[(4R,5S,6S,7R,9R,10R,11E,13E,16R)-10-acetyloxy-6-[(2S,3R,4R,5S,6R)-5-[(2S,4R,5S,6S)-4-acetyloxy-4,6-dimethyl-5-propanoyloxy-oxan-2-yl]oxy-4-(dimethylamino)-6-methyl-3-oxidanyl-oxan-2-yl]oxy-5-methoxy-9,16-dimethyl-2-oxidanylidene-7-(2-oxidanylideneethyl)-1-oxacyclohexadeca-11,13-dien-4-yl] propanoate;Activity: Antibacterial;Anti-Bacterial Agents;Anti-Infective Agents;ATC code: J01FA03 J01FA11;CYP…
116	Antibacterial		5282189	Turimycin	Macrolide	Macrolide	50S Ribosome	InChI=1S/C35H59NO13/c1-19-16-23(14-15-37)31(32(44-8)25(39)17-26(40)45-20(2)12-10-9-11-13-24(19)38)49-34-29(41)28(36(6)7)30(21(3)47-34)48-27-18-35(5,43)33(42)22(4)46-27/h9-11,13,15,19-25,27-34,38-39,41-43H,12,14,16-18H2,1-8H3/b10-9+,13-11+/t19-,20-,21-,22+,23+,24+,25-,27+,28-,29-,30-,31+,32+,33+,34+,35-/m1/s1	XYJOGTQLTFNMQG-KJHBSLKPSA-N	2-[(4R,5S,6S,7R,9R,10R,11E,13E,16R)-6-[(2S,3R,4R,5S,6R)-5-[(2S,4R,5S,6S)-4,5-dihydroxy-4,6-dimethyloxan-2-yl]oxy-4-(dimethylamino)-3-hydroxy-6-methyloxan-2-yl]oxy-4,10-dihydroxy-5-methoxy-9,16-dimethyl-2-oxo-1-oxacyclohexadeca-11,13-dien-7-yl]acetaldehyde	C35H59NO13	12	5	8	3	4	3	-0.5715	195.11	1	13	702.859	O1C(C)C(OC2OC(C)C(O)C(O)(C2)C)C([NH+](C)C)C(O)C1OC1C(OC)C(O)CC(OC(CC=CC=CC(O)C(CC1CC=O)C)C)=O	Chemical Actions and Uses;Anti-Infective Agents;Therapeutic Uses;Anti-Bacterial Agents;Pharmacologic Actions	Turimycin;kitasamycin;Selectomycin;Stereomycine;Leucomycin V;Antibiotic A 6599;Antibiotic JA-6599;1392-21-8;Leucomycins;Ayermicina;Kitasamycine;Kitasamycinum;Quitasamicina;Syneptine;Leucomycin (TN);AC1NQZMV;Kitasamycin (JP16/USAN);Kitasamycin antibiotic complex;CHEBI:31753;LS-158213;C 637;Kitasamycin antibiotic complex (A1 - A15);ST51053276;C13103;C14064;D02269;I06-1898;[(4R,5S,6S,7R,9R,10R,11E,1…	<a href="http://www.tci-asiapacific.com/catalog/K0046.html">TCI (Asia/Pacific Site)</a>;"<a href=""http://www.tci-india.com/catalog/K0046.html"">TCI India</a>";"<a href=""http://www.tci-korea.co.kr/catalog/K0046.html"">TCI (Korean Site)</a>";"<a href=""http://www.tci-uk.co.uk/catalog/K0046.html"">TCI UK</a>";"<a href=""http://www.tciamerica.com/catalog/K0046.html"">TCI America</a>";"<a href=""htt…
117	Antibacterial		5282211	Rokitamycin	Macrolide	Macrolide	50S Ribosome	InChI=1S/C42H69NO15/c1-11-16-32(48)55-40-27(6)53-34(23-42(40,7)58-31(47)12-2)56-37-26(5)54-41(36(50)35(37)43(8)9)57-38-28(19-20-44)21-24(3)29(45)18-15-13-14-17-25(4)52-33(49)22-30(46)39(38)51-10/h13-15,18,20,24-30,34-41,45-46,50H,11-12,16-17,19,21-23H2,1-10H3/b14-13+,18-15+/t24-,25-,26-,27+,28+,29+,30-,34+,35-,36-,37-,38+,39+,40+,41+,42-/m1/s1	VYWWNRMSAPEJLS-MDWYKHENSA-N	[(2S,3S,4R,6S)-6-[(2R,3S,4R,5R,6S)-6-[[(4R,5S,6S,7R,9R,10R,11E,13E,16R)-4,10-dihydroxy-5-methoxy-9,16-dimethyl-2-oxo-7-(2-oxoethyl)-1-oxacyclohexadeca-11,13-dien-6-yl]oxy]-4-(dimethylamino)-5-hydroxy-2-methyloxan-3-yl]oxy-2,4-dimethyl-4-propanoyloxyoxan-3-yl] butanoate	C42H69NO15	12	3	15	2	3	3	1.7404	207.25	1	15	829.014	O1C(C)C(OC2OC(C)C(OC(=O)CCC)C(OC(=O)CC)(C2)C)C([NH+](C)C)C(O)C1OC1C(OC)C(O)CC(OC(CC=CC=CC(O)C(CC1CC=O)C)C)=O		rokitamycin;Ricamycin;Rokitamicina;Rokitamycine;Rokitamycinum;TMS 19Q;Rokitamycine [French];Rokitamycinum [Latin];Rokitamicina [Spanish];CCRIS 5267;74014-51-0;BRN 5220127;Leucomycin V, 4B-butanoate 3B-propanoate;Leucomycin V, 4(sup B)-butanoate 3(Sup B)-propanoate;((4R,5S,6S,7R,9R,10R,11E,13E,16R)-7-(Formylmethyl)-4,10-dihydroxy-5-methoxy-9,16-dimethyl-2-oxooxacyclohexadeca-11,13-dien-6-yl)-3,6-d…	[(2S,3S,4R,6S)-6-[(2R,3S,4R,5R,6S)-4-(dimethylamino)-6-[[(4R,5S,6S,7R,9R,10R,11E,13E,16R)-5-methoxy-9,16-dimethyl-4,10-bis(oxidanyl)-2-oxidanylidene-7-(2-oxidanylideneethyl)-1-oxacyclohexadeca-11,13-dien-6-yl]oxy]-2-methyl-5-oxidanyl-oxan-3-yl]oxy-2,4-dimethyl-4-propanoyloxy-oxan-3-yl] butanoate;Activity: Antibacterial;ATC code: J01FA12;Drug / Therapeutic Agent;"For further information visit the …
118	Antibacterial		5354042	Ostreogrycin a	Macrolide	Macrolide	50S Ribosome	InChI=1S/C28H35N3O7/c1-17(2)26-19(4)9-10-24(34)29-11-5-7-18(3)13-20(32)14-21(33)15-25-30-22(16-37-25)27(35)31-12-6-8-23(31)28(36)38-26/h5,7-10,13,16-17,19-20,26,32H,6,11-12,14-15H2,1-4H3,(H,29,34)/b7-5-,10-9-,18-13-	DAIKHDNSXMZDCU-RLJJXFIZSA-N		C28H35N3O7	6	2	1	1	3	3	2.65937	139.04	3	7	525.602	O1C(C(C)C)C(C=CC(=O)NCC=CC(=CC(O)CC(=O)Cc2occ(n2)C(=O)N2C(=CCC2)C1=O)C)C	Pharmacologic Actions;Chemical Actions and Uses;Anti-Bacterial Agents;Anti-Infective Agents;Therapeutic Uses	Ostreogrycin a;VERNAMYCIN A;Virginiamycin Factor M1;Streptogramin A;virginiamycin m1;EINECS 244-376-6;NSC 87432;NSC 244426;Pristinamycin IIA;NSC87432;Ostreogrycin G;Staphylomycin M;NSC244426;Staphylomycin M1;Pristinamycin IIB;Virginiamycin IIB;21411-53-0;8,14,15,24,25-Hexahydro-14-hydroxy-4,12-dimethyl-3-(1-methylethyl)-3H-21,18-nitrilo-1H,22H-pyrrolo[2,1-c][1,8,4,19]dioxadiazacyclotetracosine-1,…	Anti-Bacterial Agents;Anti-Infective Agents;Deposition record created from database Chemistry on host DrZZLaptop on Oct 30, 2011;DTP/NCI DIS cdk 1.4.4. Release-October 2011.;Structure Evaluation:Consistent with Molecular Formula.
119	Antibacterial		6449787	Lucimycin	Macrolide	Macrolide	50S Ribosome	InChI=1S/C36H53NO13/c1-3-4-12-23-13-10-8-6-5-7-9-11-14-24(48-35-33(42)31(37)32(41)21(2)46-35)18-28-30(34(43)44)25(39)20-36(45,50-28)19-22(38)17-27-26(49-27)15-16-29(40)47-23/h5-11,14-16,21-28,30-33,35,38-39,41-42,45H,3-4,12-13,17-20,37H2,1-2H3,(H,43,44)/b6-5-,9-7-,10-8-,14-11-,16-15-/t21-,22?,23?,24?,25?,26?,27?,28?,30?,31+,32-,33+,35+,36?/m1/s1	MUAOHYJGHYFDSA-AGEHBSRGSA-N		C36H53NO13	10	5	6	3	4	4	-0.7615	235.44	1	13	707.814	O1C(C)C(O)C([NH3+])C(O)C1OC1CC2OC(O)(CC(O)C2C(=O)[O-])CC(O)CC2OC2C=CC(OC(CC=CC=CC=CC=C1)CCCC)=O	Lucimycin;Lucimicina;Lucimycine;Lucimycinum;Lucimycin [INN];Lucimycine [INN-French];Lucimycinum [INN-Latin];Lucimicina [INN-Spanish];11035-14-6		Chemical Actions and Uses;Pharmacologic Actions;Anti-Bacterial Agents;Anti-Infective Agents;Antifungal Agents;Therapeutic Uses
120	Antibacterial		5280440	Tylosin	Macrolide	Macrolide	50S Ribosome	InChI=1S/C46H77NO17/c1-13-33-30(22-58-45-42(57-12)41(56-11)37(52)26(5)60-45)18-23(2)14-15-31(49)24(3)19-29(16-17-48)39(25(4)32(50)20-34(51)62-33)64-44-38(53)36(47(9)10)40(27(6)61-44)63-35-21-46(8,55)43(54)28(7)59-35/h14-15,17-18,24-30,32-33,35-45,50,52-55H,13,16,19-22H2,1-12H3/b15-14+,23-18+/t24-,25+,26-,27-,28+,29+,30-,32-,33-,35+,36-,37-,38-,39-,40-,41-,42-,43+,44+,45-,46-/m1/s1	WBPYTXDJUQJLPQ-VMXQISHHSA-N	2-[(4R,5S,6S,7R,9R,11E,13E,15R,16R)-6-[(2R,3R,4R,5S,6R)-5-[(2S,4R,5S,6S)-4,5-dihydroxy-4,6-dimethyloxan-2-yl]oxy-4-(dimethylamino)-3-hydroxy-6-methyloxan-2-yl]oxy-16-ethyl-4-hydroxy-15-[[(2R,3R,4R,5R,6R)-5-hydroxy-3,4-dimethoxy-6-methyloxan-2-yl]oxymethyl]-5,9,13-trimethyl-2,10-dioxo-1-oxacyclohexadeca-11,13-dien-7-yl]acetaldehyde	C46H77NO17	16	5	13	3	4	4	0.4164	239.87	1	17	917.12	O1C(C)C(OC2OC(C)C(O)C(O)(C2)C)C([NH+](C)C)C(O)C1OC1C(C)C(O)CC(OC(CC)C(C=C(C=CC(=O)C(CC1CC=O)C)C)COC1OC(C)C(O)C(OC)C1OC)=O	Tylosin;CHEBI:17658;Macrolides;1401-69-0;AC1NQX0W;BSPBio_003548;CHEMBL42743;SPECTRUM1505312;HMS1922B22;HMS2093B11;CCG-38343;DAP001492;LMPK04000004;C01457;I06-1959;[(2R,3R,4E,6E,9R,11R,12S,13S,14R)-12-[3,6-dideoxy-4-O-(2,6-dideoxy-3-C-methyl-alpha-L-ribo-hexopyranosyl)-3-(dimethylamino)-beta-D-glucopyranosyloxy]-2-ethyl-14-hydroxy-5,9,13-trimethyl-8,16-dioxo-11-(2-oxoethyl)oxacyclohexadeca-4,6-die…	Pathway: <a href="http://www.genome.jp/kegg-bin/show_pathway?map00522+C01457">map00522</a> Biosynthesis of 12-, 14- and 16-membered macrolides;Is a reactant of enzyme EC: 2.1.1.101;NINDS:1505312;"Same as: <a href=""http://pubchem.ncbi.nlm.nih.gov/summary/summary.cgi?sid=7849535"">D02490</a>";Microsource:1505312;2-[(4R,5S,6S,7R,9R,11E,13E,15R,16R)-15-[[(2R,3R,4R,5R,6R)-3,4-dimethoxy-6-methyl-5-oxi…	Pharmacologic Actions;Chemical Actions and Uses;Anti-Bacterial Agents;Anti-Infective Agents;Therapeutic Uses
121	Antibacterial		5382853	Midecamycin	Macrolide	Macrolide	50S Ribosome	InChI=1S/C41H67NO15/c1-11-30(45)54-29-21-32(47)51-24(4)16-14-13-15-17-28(44)23(3)20-27(18-19-43)37(38(29)50-10)57-40-35(48)34(42(8)9)36(25(5)53-40)56-33-22-41(7,49)39(26(6)52-33)55-31(46)12-2/h13-15,17,19,23-29,33-40,44,48-49H,11-12,16,18,20-22H2,1-10H3/b14-13+,17-15+/t23-,24-,25?,26?,27+,28+,29-,33?,34?,35?,36?,37+,38+,39?,40?,41?/m1/s1	DMUAPQTXSSNEDD-KTNMPIKDSA-N	[(4R,5S,6S,7R,9R,10R,11E,13E,16R)-6-[4-(dimethylamino)-3-hydroxy-5-(4-hydroxy-4,6-dimethyl-5-propanoyloxyoxan-2-yl)oxy-6-methyloxan-2-yl]oxy-10-hydroxy-5-methoxy-9,16-dimethyl-2-oxo-7-(2-oxoethyl)-1-oxacyclohexadeca-11,13-dien-4-yl] propanoate	C41H67NO15	12	3	14	2	3	3	1.3503	207.25	1	15	814.987	O1C(C)C(OC2OC(C)C(OC(=O)CC)C(O)(C2)C)C([NH+](C)C)C(O)C1OC1C(OC)C(OC(=O)CC)CC(OC(CC=CC=CC(O)C(CC1CC=O)C)C)=O	midecamycin;Antibitotic YL-704 B1;35457-80-8;Prestwick_515;Antibiotic SF-837;Antibiotic YL 704B1;AC1NTK8S;Prestwick2_000153;Leucomycin V,4B-dipropanoate;HMS1568O08;NSC154011;NSC-154011;LEUCOMYCIN V - RELATED TO D239737 - MEIJI SEIKA;[(4R,5S,6S,7R,9R,10R,11E,13E,16R)-6-[4-(dimethylamino)-3-hydroxy-5-(4-hydroxy-4,6-dimethyl-5-propanoyloxyoxan-2-yl)oxy-6-methyloxan-2-yl]oxy-10-hydroxy-5-methoxy-9,16…	[(4R,5S,6S,7R,9R,10R,11E,13E,16R)-6-[4-(dimethylamino)-5-(4,6-dimethyl-4-oxidanyl-5-propanoyloxy-oxan-2-yl)oxy-6-methyl-3-oxidanyl-oxan-2-yl]oxy-5-methoxy-9,16-dimethyl-10-oxidanyl-2-oxidanylidene-7-(2-oxidanylideneethyl)-1-oxacyclohexadeca-11,13-dien-4-yl] propanoate;Deposition record created from database Chemistry on host DrZZLaptop on Oct 30, 2011;DTP/NCI DIS cdk 1.4.4. Release-October 2011.;…	Anti-Bacterial Agents;Anti-Infective Agents;Chemical Actions and Uses;Pharmacologic Actions;Therapeutic Uses
122	Antibacterial		6440717	Spiramycin	Macrolide	Macrolide	50S Ribosome	InChI=1S/C43H74N2O14/c1-24-21-29(19-20-46)39(59-42-37(49)36(45(9)10)38(27(4)56-42)58-35-23-43(6,51)41(50)28(5)55-35)40(52-11)31(47)22-33(48)53-25(2)15-13-12-14-16-32(24)57-34-18-17-30(44(7)8)26(3)54-34/h12-14,16,20,24-32,34-42,47,49-51H,15,17-19,21-23H2,1-11H3/b13-12+,16-14+/t24-,25-,26+,27-,28+,29+,30+,31-,32+,34+,35+,36-,37-,38-,39+,40+,41+,42+,43-/m1/s1	ACTOXUHEUCPTEW-KWBWCIJSSA-N	2-[(4R,5S,6S,7R,9R,10R,11E,13E,16R)-6-[(2S,3R,4R,5S,6R)-5-[(2S,4R,5S,6S)-4,5-dihydroxy-4,6-dimethyloxan-2-yl]oxy-4-(dimethylamino)-3-hydroxy-6-methyloxan-2-yl]oxy-10-[(2R,5S,6S)-5-(dimethylamino)-6-methyloxan-2-yl]oxy-4-hydroxy-5-methoxy-9,16-dimethyl-2-oxo-1-oxacyclohexadeca-11,13-dien-7-yl]acetaldehyde	C43H74N2O14	13	4	11	3	4	4	-0.5091	197.78	2	14	845.081	O1C(C)C(OC2OC(C)C(O)C(O)(C2)C)C([NH+](C)C)C(O)C1OC1C(OC)C(O)CC(OC(CC=CC=CC(OC2OC(C)C([NH+](C)C)CC2)C(CC1CC=O)C)C)=O	Anti-Bacterial Agents;Antiparasitic Agents;Antiprotozoal Agents;Coccidiostats;Pharmacologic Actions;Anti-Infective Agents;Chemical Actions and Uses;Therapeutic Uses	Foromacidine A;Spiramycin A;Spiramycin 1;Spiramycin I;Demycarosylturimycin H;spiramycin;Foromacidin;Leucomycin V, 9-O-((2R,5S,6R)-5-(dimethylamino)tetrahydro-6-methyl-2H-pyran-2-yl)-;NSC55926;NSC64393;IC 5902;RP 5337;UNII-033ECH6IFG;AC1O5U2X;24916-50-5;8025-81-8;C43H74N2O14;LS-145761;Leucomycin V, 9-O-(5-(dimethylamino)tetrahydro-6-methyl-2H-pyran-2-yl)-, (9(2R,5S,6R))-;13430-00-7;13441-34-4;1403…	2-[(4R,5S,6S,7R,9R,10R,11E,13E,16R)-6-[(2S,3R,4R,5S,6R)-4-(dimethylamino)-5-[(2S,4R,5S,6S)-4,6-dimethyl-4,5-bis(oxidanyl)oxan-2-yl]oxy-6-methyl-3-oxidanyl-oxan-2-yl]oxy-10-[(2R,5S,6S)-5-(dimethylamino)-6-methyl-oxan-2-yl]oxy-5-methoxy-9,16-dimethyl-4-oxidanyl-2-oxidanylidene-1-oxacyclohexadeca-11,13-dien-7-yl]ethanal;ANTIBIOTIC SUBSTANCE FROM STREPTOMYCES AMBOFACIENS; OR HYDROCHLORIDE SALT;Drug /…
123	Antibacterial		6433194	Filipin	Macrolide	Macrolide	Cell wall	InChI=1S/C35H58O11/c1-4-5-11-16-31(42)34-33(44)22-29(40)20-27(38)18-25(36)17-26(37)19-28(39)21-32(43)23(2)14-12-9-7-6-8-10-13-15-30(41)24(3)46-35(34)45/h6-10,12-15,24-34,36-44H,4-5,11,16-22H2,1-3H3/b7-6+,10-8+,12-9+,15-13+,23-14+/t24-,25+,26-,27+,28-,29+,30+,31-,32+,33+,34-/m1/s1	IMQSIXYSKPIGPD-YQRUMEKGSA-N	(3R,4S,6S,8S,10R,12R,14R,16S,17E,19E,21E,23E,25E,27S,28R)-4,6,8,10,12,14,16,27-octahydroxy-3-[(1R)-1-hydroxyhexyl]-17,28-dimethyl-1-oxacyclooctacosa-17,19,21,23,25-pentaen-2-one	C35H58O11	10	9	5	3	4	1	1.888	208.37	0	11	654.838	O1C(C)C(O)C=CC=CC=CC=CC=C(C)C(O)CC(O)CC(O)CC(O)CC(O)CC(O)CC(O)C(C(O)CCCCC)C1=O	Filipin;Filimarisin;14-Deoxylagosin;Filimarisin (VAN);FILIPIN III;Filipine [INN-French];Filipinum [INN-Latin];Filipina [INN-Spanish];NSC 3364;U 5956;U-5956;3,5,7,9,11,13,15,26,27-Nonahydroxy-2-(1-hydroxyhexyl)-16-methyl-16,18,20,22,24-octacosapentaensaeure-1,27-lacton;Oxacyclooctacosa-17,19,21,23,25-pentaen-2-one, 4,6,8,10,12,14,16,27-octahydroxy-3-(1-hydroxyhexyl)-17,28-dimethyl-;480-49-9;NSC336…	Fungicide, bactericide, wood preservative;Mutation data;NIAID ChemDB HIV, Opportunistic Infections and Tuberculosis Therapeutics Database;Natural Product;Activity: Antifungal;Natural Products, Microbial;Anti-Infective Agents;Antiviral agents;Antifungal Agents;Alkenes;Agricultural Chemical;ISOLATED FROM STREPTOMYCES FILIPENENSIS (FROM PHILIPPINE SOIL; FILIPIN CONTAINS AT LEAST 8 PENTAENE COMPOUNDS…	Anti-Bacterial Agents;Anti-Infective Agents;Antiviral Agents;Antifungal Agents;Therapeutic Uses;Chemical Actions and Uses;Pharmacologic Actions
124	Antibacterial		6326658	Verrucarin A	Macrolide	Macrolide	Nucleic Acid	InChI=1S/C27H34O9/c1-16-8-10-26-14-33-24(31)23(30)17(2)9-11-32-21(28)6-4-5-7-22(29)36-18-13-20(35-19(26)12-16)27(15-34-27)25(18,26)3/h4-7,12,17-20,23,30H,8-11,13-15H2,1-3H3/b6-4+,7-5-/t17-,18-,19-,20-,23+,25-,26-,27+/m1/s1	NLUGUZJQJYVUHS-IDXDZYHTSA-N		C27H34O9	6	1	0	1	3	5	2.1706	120.89	0	9	502.56	O1CC12C1OC3C4(CCC(=C3)C)COC(=O)C(O)C(CCOC(=O)C=CC=CC(OC(C1)C24C)=O)C	Verrucarin A;3148-09-2;Antibiotic 379Y;NSC200736;CHEMBL136985;CHEBI:230243;C09746;(4S,5R,10E,12Z,16R,16aS,17S,18R,19aR,23aR)-4-hydroxy-5,16a,21-trimethyl-4,5,6,7,16,16a,22,23-octahydro-3H,18H,19aH-spiro[16,18-methano[1,6,12]trioxacyclooctadecino[3,4-d]chromene-17,2'-oxirane]-3,9,14-trione;Spiro(16,18-methano-1H,3H,23H-[1,6,12]trioxacyclooctadecino[3, 4-d](1)benzopyran-17(18H),2'-oxirane)-3,9,14-t…	EXTRACTED FROM HYPOCREALEAN FUNGAL EPIBIONT OF BACCHARIS CORIDIFOLIA;Natural Products, Fungal;NIAID ChemDB HIV, Opportunistic Infections and Tuberculosis Therapeutics Database	Antineoplastic Agents;Pharmacologic Actions;Anti-Bacterial Agents;Anti-Infective Agents;Antineoplastic Agents, Phytogenic;Therapeutic Uses;Antibiotics, Antineoplastic;Chemical Actions and Uses
125	Antibacterial	DB06733	6436223	Bafilomycin	Macrolide	Macrolide	Cell wall	InChI=1S/C35H58O9/c1-19(2)32-24(7)27(36)18-35(40,44-32)26(9)31(38)25(8)33-28(41-10)14-12-13-20(3)15-22(5)30(37)23(6)16-21(4)17-29(42-11)34(39)43-33/h12-14,16-17,19,22-28,30-33,36-38,40H,15,18H2,1-11H3/b14-12+,20-13+,21-16+,29-17-/t22-,23+,24-,25-,26-,27+,28-,30-,31+,32+,33+,35+/m0/s1	XDHNQDDQEHDUTM-JQWOJBOSSA-N	(3Z,5E,7R,8S,9S,11E,13E,15S,16R)-16-[(2S,3R,4S)-4-[(2R,4R,5S,6R)-2,4-dihydroxy-5-methyl-6-propan-2-yloxan-2-yl]-3-hydroxypentan-2-yl]-8-hydroxy-3,15-dimethoxy-5,7,9,11-tetramethyl-1-oxacyclohexadeca-3,5,11,13-tetraen-2-one	C35H58O9	8	4	7	1	4	2	4.6927	134.91	0	9	622.84	O1C(C(C(O)C(C)C2(OC(C(C)C)C(C)C(O)C2)O)C)C(OC)C=CC=C(CC(C)C(O)C(C=C(C=C(OC)C1=O)C)C)C	Antifungal Agents;Chemical Actions and Uses;Enzyme Inhibitors;Molecular Mechanisms of Pharmacological Action;Pharmacologic Actions;Therapeutic Uses;Anti-Infective Agents	bafilomycin A1;CHEBI:22689;NSC 381866;Hygrolidin, 21-O-de(3-carboxy-1-oxo-2-propenyl)-2-demethyl-2-methoxy-24-methyl-;NSC381866;88899-55-2;AC1O5L9Z;BSPBio_001470;CHEMBL290814;MEGxm0_000385;ACon0_000813;MolPort-001-739-960;C35H58O9;CPD-10325;LS-178068;NP-007111;(3Z,5E,7R,8S,9S,11E,13E,15S,16R)-16-[(2S,3R,4S)-4-[(2R,4R,5S,6R)-2,4-dihydroxy-5-methyl-6-propan-2-yloxan-2-yl]-3-hydroxypentan-2-yl]-8-hy…	(3Z,5E,7R,8S,9S,11E,13E,15S,16R)-3,15-dimethoxy-5,7,9,11-tetramethyl-16-[(2S,3R,4S)-4-[(2R,4R,5S,6R)-5-methyl-2,4-bis(oxidanyl)-6-propan-2-yl-oxan-2-yl]-3-oxidanyl-pentan-2-yl]-8-oxidanyl-1-oxacyclohexadeca-3,5,11,13-tetraen-2-one;Anti-Infective Agents;Enzyme inhibitors;Naylor et al. Identification of a chemical probe for NAADP by virtual screening Nature Chemical Biology, doi: 10.1038/nchembio.1…
126	Antibacterial	DB01669	5459319	Virginiamycin M1	Macrolide	Macrolide	50S Ribosome	InChI=1S/C28H35N3O7/c1-17(2)26-19(4)9-10-24(34)29-11-5-7-18(3)13-20(32)14-21(33)15-25-30-22(16-37-25)27(35)31-12-6-8-23(31)28(36)38-26/h5,7-10,13,16-17,19-20,26,32H,6,11-12,14-15H2,1-4H3,(H,29,34)/b7-5+,10-9+,18-13+/t19-,20-,26-/m1/s1	DAIKHDNSXMZDCU-FQTGFAPKSA-N		C28H35N3O7	6	2	1	1	3	3	2.65937	139.04	3	7	525.602	O1C(C(C)C)C(C=CC(=O)NCC=CC(=CC(O)CC(=O)Cc2occ(n2)C(=O)N2C(=CCC2)C1=O)C)C	virginiamycin m1;NSC87434;Mikamycin A;Pristinamycin IIA;Vernamycin A & B mixture;CHEMBL1236670;21411-53-0;NSC-87434;Vernamycin A & vernamycin B (1:1);Vernamycin A, mixture with vernamycin B;VERNAMYCIN A & B MIXTURE (1:1);LS-187695;C11299	Deposition record created from database Chemistry on host DrZZLaptop on Oct 30, 2011;DTP/NCI DIS cdk 1.4.4. Release-October 2011.;Structure Evaluation:Inconsistent with Molecular Formula - no structure mapped to C45H54N8O10 from C45H54N8O10.C28H35N3O7.	Chemical Actions and Uses;Therapeutic Uses;Anti-Infective Agents;Anti-Bacterial Agents;Pharmacologic Actions
127	Antibacterial	DB00355	5742832	Aztreonam	Monobactam	Beta-lactam	Cell wall	InChI=1S/C13H17N5O8S2/c1-5-7(10(20)18(5)28(23,24)25)16-9(19)8(6-4-27-12(14)15-6)17-26-13(2,3)11(21)22/h4-5,7H,1-3H3,(H2,14,15)(H,16,19)(H,21,22)(H,23,24,25)/b17-8-/t5-,7-/m0/s1	WZPBZJONDBGPKJ-VEHQQRBSSA-N	2-[(Z)-[1-(2-amino-1,3-thiazol-4-yl)-2-[[(2S,3S)-2-methyl-4-oxo-1-sulfoazetidin-3-yl]amino]-2-oxoethylidene]amino]oxy-2-methylpropanoic acid	C13H17N5O8S2	4	2	8	1	1	2	-2.8498	201.25	5	8	433.422	s1cc(nc1N)C(=NOC(C(=O)[O-])(C)C)C(=O)NC1C(N(S(=O)(=O)[O-])C1=O)C	Anti-Bacterial Agents;Anti-Infective Agents;Chemical Actions and Uses;Pharmacologic Actions;Therapeutic Uses	aztreonam;Azactam;Primbactam;NSC646279;78110-38-0;CHEBI:161680;SQ-26776;Prestwick_914;S1505_Selleck;Prestwick2_000185;Prestwick3_000185;CHEMBL158;AC1NX3U2;BSPBio_000109;BIDD:GT0765;Ambap78110-38-0;BPBio1_000121;MolPort-003-886-345;HMS1568F11;HMS2090K09;AC-4330;NCGC00179656-01;Monobactam, SQ 26776, Squibb 26776, Aztreonam;BRD-K62607865-001-03-0;[2S-[2alpha,3beta(Z)]]-2-[[[1-(2-Amino-4-thiazolyl)-2…	BIOMOL:DL-336;BIOA;Deposition record created from database Chemistry on host DrZZLaptop on Oct 30, 2011;non-genotoxic agent;Prestwick:185;Structure Shown: tested chemical;"Substance included in EPA DSSTox FDAMDD: FDA Maximum (Recommended) Daily Dose Database File <a href=""http://www.epa.gov/ncct/dsstox/sdf_fdamdd.html""target=""_blank"">[link to DSSTox SDF Download Page]</a>";2-[(Z)-[1-(2-azanyl…
128	Antibacterial		9576417	Carumonam	Monobactam	Beta-lactam	Cell wall	InChI=1S/C12H14N6O10S2/c13-11-15-4(3-29-11)7(17-28-2-6(19)20)9(21)16-8-5(1-27-12(14)23)18(10(8)22)30(24,25)26/h3,5,8H,1-2H2,(H2,13,15)(H2,14,23)(H,16,21)(H,19,20)(H,24,25,26)/b17-7-/t5?,8-/m0/s1	UIMOJFJSJSIGLV-OLYSPXGSSA-N	2-[(Z)-[1-(2-amino-1,3-thiazol-4-yl)-2-[[(3S)-2-(carbamoyloxymethyl)-4-oxo-1-sulfoazetidin-3-yl]amino]-2-oxoethylidene]amino]oxyacetic acid	C12H14N6O10S2	5	3	11	1	3	2	-4.553	253.57	6	10	464.392	s1cc(nc1N)C(=NOCC(=O)[O-])C(=O)NC1C(N(S(=O)(=O)[O-])C1=O)COC(=O)N		Carumonam;Carumonamum [Latin];CCRIS 1924;Carumonamum;AMA 1080;(((2-((2-(((Aminocarbonyl)oxy)methyl)-4-oxo-1-sulfo-3-azetidinyl)amino)-1-(2-amino-4-thiazolyl)-2-oxoethylidene)amino)oxy)acetic acid (2S-(2alpha,3alpha(Z)))-;Acetic acid, (((2-((2-(((aminocarbonyl)oxy)methyl)-4-oxo-1-sulfo-3-azetidinyl)amino)-1-(2-amino-4-thiazolyl)-2-oxoethylidene)amino)oxy)-, (2S-(2alpha,3alpha(Z)))-;Acetic acid, ((…
129	Antibacterial		9576769	Tigemonam	Monobactam	Beta-lactam	Cell wall	InChI=1S/C12H15N5O9S2/c1-12(2)8(10(21)17(12)26-28(22,23)24)15-9(20)7(16-25-3-6(18)19)5-4-27-11(13)14-5/h4,8H,3H2,1-2H3,(H2,13,14)(H,15,20)(H,18,19)(H,22,23,24)/b16-7-/t8-/m1/s1	VAMSVIZLXJOLHZ-QWFSEIHXSA-N	2-[(Z)-[1-(2-amino-1,3-thiazol-4-yl)-2-[[(3S)-2,2-dimethyl-4-oxo-1-sulfooxyazetidin-3-yl]amino]-2-oxoethylidene]amino]oxyacetic acid	C12H15N5O9S2	4	2	9	1	1	2	-3.3067	210.48	5	9	435.394	s1cc(nc1N)C(=NOCC(=O)[O-])C(=O)NC1C(N(OS(=O)(=O)[O-])C1=O)(C)C		tigemonam;Tigemonamum;Tigemonam [INN];Tigemonamum [Latin];SQ-30213;102507-71-1;Acetic acid, (((1-(2-amino-4-thiazolyl)-2-((2,2-dimethyl-4-oxo-1-(sulfooxy)-3-azetidinyl)amino)-2-oxoethylidene)amino)oxy)-, (S-(Z))-
130	Antibacterial		71674	Avilamycin	Miscellaneous	Miscellaneous	30S Ribosome	InChI=1S/C61H88Cl2O32/c1-21(2)53(70)87-49-45-32(92-61(93-45)52-51(78-20-79-52)60(72,27(8)64)28(9)91-61)19-77-56(49)89-57-48(76-14)39(68)44(31(83-57)18-73-11)88-55-40(69)47(43(74-12)24(5)82-55)85-34-17-58(10)50(26(7)81-34)94-59(95-58)16-30(66)42(25(6)90-59)84-33-15-29(65)41(23(4)80-33)86-54(71)35-22(3)36(62)38(67)37(63)46(35)75-13/h21,23-26,28-34,39-45,47-52,55-57,65-69,72H,15-20H2,1-14H3/t23-,24-…	XIRGHRXBGGPPKY-OTPQUNEMSA-N	[(2R,3S,4R,6S)-6-[(2'R,3'S,3aR,4R,4'R,6S,7aR)-6-[(2S,3R,4R,5S,6R)-2-[(2R,3S,4S,5S,6S)-6-[(2R,3aS,3'aR,6'R,7R,7'S,7aR,7'aR)-7'-acetyl-7'-hydroxy-6'-methyl-7-(2-methylpropanoyloxy)spiro[4,6,7,7a-tetrahydro-3aH-[1,3]dioxolo[4,5-c]pyran-2,4'-6,7a-dihydro-3aH-[1,3]dioxolo[4,5-c]pyran]-6-yl]oxy-4-hydroxy-5-methoxy-2-(methoxymethyl)oxan-3-yl]oxy-3-hydroxy-5-methoxy-6-methyloxan-4-yl]oxy-4'-hydroxy-2',4,…	C61H88Cl2O32	30	6	20	3	5	11	1.05202	384.88	0	32	1404.25	Clc1c(C)c(C(OC2C(OC(OC3C(OC4(OC5(C(O4)C(OC(OC4C(OC)C(OC(OC6C(O)C(OC)C(OC6COC)OC6OCC7OC8(OC(C)C(O)(C9OCOC89)C(=O)C)OC7C6OC(=O)C(C)C)C4O)C)C5)C)C)CC3O)C)CC2O)C)=O)c(OC)c(Cl)c1O	Anti-Bacterial Agents;Anti-Infective Agents;Therapeutic Uses;Chemical Actions and Uses;Pharmacologic Actions	Avilamycin;Surmax;Avilamycine [INN-French];Avilamycinum [INN-Latin];Avilamycina [INN-Spanish];HSDB 7029;LY 048740;LY 048 740;(2r,3s,4r,6s)-6-{[(3ar,4r,4'r,5's,6s,6'r,7ar)-6-{[(2s,3r,4r,5s,6r)-2-{[(2r,3s,4s,5s,6s)-6-({(2r,3as,3a'r,6'r,7r,7's,7ar,7a'r)-7'-acetyl-7'-hydroxy-6'-methyl-7-[(2-methylpropanoyl)oxy]octahydro-4h-2,4'-spirobi[[1,3]dioxolo[4,5-c]pyran]-6-yl}oxy)-4-hydroxy-5-methoxy-2-(methox…	[(2R,3S,4R,6S)-6-[(2'R,3'S,3aR,4R,4'R,6S,7aR)-6-[(2S,3R,4R,5S,6R)-2-[(2R,3S,4S,5S,6S)-6-[(2R,3aS,3'aR,6'R,7R,7'S,7aR,7'aR)-7'-ethanoyl-6'-methyl-7-(2-methylpropanoyloxy)-7'-oxidanyl-spiro[4,6,7,7a-tetrahydro-3aH-[1,3]dioxolo[4,5-c]pyran-2,4'-6,7a-dihydro-3aH-[1,3]dioxolo[4,5-c]pyran]-6-yl]oxy-5-methoxy-2-(methoxymethyl)-4-oxidanyl-oxan-3-yl]oxy-5-methoxy-6-methyl-3-oxidanyl-oxan-4-yl]oxy-2',4,7a-…
131	Antibacterial		496993	Ranbezolid	Oxazolidinone	Oxazolidinone	30S Ribosome	InChI=1S/C21H24FN5O6/c1-14(28)23-11-17-13-26(21(29)33-17)15-2-4-19(18(22)10-15)25-8-6-24(7-9-25)12-16-3-5-20(32-16)27(30)31/h2-5,10,17H,6-9,11-13H2,1H3,(H,23,28)/t17-/m0/s1	PWHNTOQANLCTHN-KRWDZBQOSA-N	N-[[(5S)-3-[3-fluoro-4-[4-[(5-nitrofuran-2-yl)methyl]piperazin-1-yl]phenyl]-2-oxo-1,3-oxazolidin-5-yl]methyl]acetamide	C21H24FN5O6	2	1	8	1	2	4	0.9597	125.28	5	6	462.458	Fc1cc(N2CC(OC2=O)CNC(=O)C)ccc1N1CC[NH+](CC1)Cc1oc([N+](=O)[O-])cc1		Ranbezolid;AC1LAX1P;RBx7644 (*Hydrochloride*);CHEMBL251384;Acetamide, N-[[(5S)-3-[3-fluoro-4-[4-[(5-nitro-2-furanyl)methyl]-1-piperazinyl]phenyl]-2-oxo-5-oxazolidinyl]methyl]-;N-[[(5S)-3-[3-fluoro-4-[4-[(5-nitrofuran-2-yl)methyl]piperazin-1-yl]phenyl]-2-oxo-1,3-oxazolidin-5-yl]methyl]acetamide	NIAID ChemDB HIV, Opportunistic Infections and Tuberculosis Therapeutics Database;N-[[(5S)-3-[3-fluoranyl-4-[4-[(5-nitrofuran-2-yl)methyl]piperazin-1-yl]phenyl]-2-oxidanylidene-1,3-oxazolidin-5-yl]methyl]ethanamide;HYDROCHLORIDE;Furans;Oxazolidines
132	Antibacterial	DB08604	5564	Triclosan	Miscellaneous	Miscellaneous	Cell wall	InChI=1S/C12H7Cl3O2/c13-7-1-3-11(9(15)5-7)17-12-4-2-8(14)6-10(12)16/h1-6,16H	XEFQLINVKFYRCS-UHFFFAOYSA-N	5-chloro-2-(2,4-dichlorophenoxy)phenol	C12H7Cl3O2	1	1	2	1	1	2	5.1447	29.46	0	2	289.545	Clc1cc(Cl)ccc1Oc1ccc(Cl)cc1O	Hypolipidemic Agents;Pharmacologic Actions;Anti-Infective Agents, Local;Antimetabolites;Chemical Actions and Uses;Molecular Mechanisms of Pharmacological Action;Therapeutic Uses;Anti-Infective Agents;Fatty Acid Synthesis Inhibitors	triclosan;5-CHLORO-2-(2,4-DICHLOROPHENOXY)PHENOL;Cloxifenolum;Triclosanum;Irgasan;2,4,4'-Trichloro-2'-hydroxydiphenyl ether;3380-34-5;Irgasan DP300;Irgasan DP 300;Caswell No. 186A;Cloxifenol;Lexol 300;Triclosanum [INN-Latin];Phenol, 5-chloro-2-(2,4-dichlorophenoxy)-;DP-300;CH 3565;Stri-Dex Face Wash;HSDB 7194;CHEBI:164200;Stri-Dex Cleansing Bar;Triclosan (USP/INN);AC1L1KMN;EINECS 222-182-2;CHEMBL…	The Crystal Structure Of P. Falciparum Enoyl Acyl Carrier Protein Reductase;Sigma Chemical Company:524190;"<a target=_blank href=""http://www.trc-canada.com/search_cat.php?Option=All&Find=Find&Search=T774250"">Toronto Research Chemicals T774250</A>";Crystal Structure Of The Helicobacter Pylori Enoyl-Acyl Carrier Protein Reductase In Complex With Hydroxydiphenyl Ether Compounds, Triclosan And Dicl…
133	Antibacterial		72495	Squalamine	Aminosterols	Miscellaneous	Cell wall	InChI=1S/C34H65N3O5S/c1-23(2)31(42-43(39,40)41)12-9-24(3)27-10-11-28-32-29(14-16-34(27,28)5)33(4)15-13-26(21-25(33)22-30(32)38)37-20-8-19-36-18-7-6-17-35/h23-32,36-38H,6-22,35H2,1-5H3,(H,39,40,41)/t24-,25-,26+,27-,28+,29+,30-,31-,32+,33+,34-/m1/s1	UIRKNQLZZXALBI-MSVGPLKSSA-N	[(3R,6R)-6-[(3S,5R,7R,8R,9S,10S,13R,14S,17R)-3-[3-(4-aminobutylamino)propylamino]-7-hydroxy-10,13-dimethyl-2,3,4,5,6,7,8,9,11,12,14,15,16,17-tetradecahydro-1H-cyclopenta[a]phenanthren-17-yl]-2-methylheptan-3-yl] hydrogen sulfate	C34H65N3O5S	2	1	16	2	3	4	2.4414	141.53	3	5	629.992	S(OC(C(C)C)CCC(C)C1CCC2C3C(CCC12C)C1(C(CC([NH2+]CCC[NH2+]CCCC[NH3+])CC1)CC3O)C)(=O)(=O)[O-]	Anti-Bacterial Agents;Anticarcinogenic Agents;Growth Substances;Pharmacologic Actions;Specialty Uses of Chemicals;Angiogenesis Modulating Agents;Antineoplastic Agents;Chemical Actions and Uses;Angiogenesis Inhibitors;Growth Inhibitors;Anti-Infective Agents;Physiological Effects of Drugs;Protective Agents;Therapeutic Uses	Squalamine;(3|A,5|A,7|A,24r)-3-({3-[(4-aminobutyl)amino]propyl}amino)-7-hydroxycholestan-24-yl hydrogen sulfate;(3beta,5alpha,7alpha,24R)-3-((3-(4-(Aminobutyl)amino)propyl)amio)cholestane-7,24-diol 24-(hydrogen sulfate);15103-99-8;3-((3-(4-(Aminobutyl)amino)propyl)amio)cholestane-7,24-diol 24-(hydrogen sulfate), (3beta,5alpha,7alpha,24R)-;3beta-N-1-(N-(3-(4-Aminobutyl))-1,3-diaminopropane)-7alpha…	Protective Agents;Growth Substances;Anti-Bacterial Agents;Antineoplastic Agents;Angiogenesis Modulating Agents;[(3R,6R)-6-[(3S,5R,7R,8R,9S,10S,13R,14S,17R)-3-[3-(4-azanylbutylamino)propylamino]-10,13-dimethyl-7-oxidanyl-2,3,4,5,6,7,8,9,11,12,14,15,16,17-tetradecahydro-1H-cyclopenta[a]phenanthren-17-yl]-2-methyl-heptan-3-yl] hydrogen sulfate;Angiogenesis Inhibitors;Antineoplastic;Anti-Infective Ag…
134	Antibacterial		121578	Decoyinin	Miscellaneous	Miscellaneous	Cell wall	InChI=1S/C11H13N5O4/c1-5-7(18)8(19)11(2-17,20-5)16-4-15-6-9(12)13-3-14-10(6)16/h3-4,7-8,17-19H,1-2H2,(H2,12,13,14)/t7-,8-,11-/m1/s1	UZSSGAOAYPICBZ-SOCHQFKDSA-N	(2R,3R,4S)-2-(6-aminopurin-9-yl)-2-(hydroxymethyl)-5-methylideneoxolane-3,4-diol	C11H13N5O4	7	4	2	0	1	3	-1.3692	139.54	5	4	279.256	O1C(n2c3ncnc(N)c3nc2)(CO)C(O)C(O)C1=C	Pharmacologic Actions;Chemical Actions and Uses;Anti-Bacterial Agents;Anti-Infective Agents;Therapeutic Uses	decoyinine;Decoyinin;Angustmycin A;Antibiotic A 14;A 14;AI3-50816;9-(6-Deoxy-beta-D-erythro-hex-5-en-2-ulofuranosyl)-9H-purin-6-amine;U-7984;9-(6-Deoxy-beta-D-erythro-hex-5-enulofuranosyl)adenine;Adenine, 9-(6-deoxy-beta-D-erythro-hex-5-enulofuranosyl)-;9-(Tetrahydro-3,4-dihydroxy-2-(hydroxymethyl)-5-methylene-2-furyl)adenine;9H-Purin-6-amine, 9-(6-deoxy-beta-D-erythro-hex-5-en-2-ulofuranosyl)-;A…	Drug / Therapeutic Agent;Anti-Bacterial Agents;Purine Nucleosides;Mycins;Anti-Infective Agents;BIOMOL:A-230;Biomol;NIAID ChemDB HIV, Opportunistic Infections and Tuberculosis Therapeutics Database;Natural Product;(2R,3R,4S)-2-(6-aminopurin-9-yl)-2-(hydroxymethyl)-5-methylidene-oxolane-3,4-diol
135	Antibacterial		445629	Thiolactomycin	Miscellaneous	Miscellaneous	Cell wall	InChI=1S/C11H14O2S/c1-5-7(2)6-11(4)9(12)8(3)10(13)14-11/h5-6,13H,1H2,2-4H3/b7-6+/t11-/m1/s1	HGCGJTZCWZFGBT-XUIVZRPNSA-N	(2R)-5-hydroxy-2,4-dimethyl-2-[(1E)-2-methylbuta-1,3-dienyl]thiophen-3-one	C11H14O2S	1	0	2	0	0	1	2.8553	40.13	0	2	209.289	S1C(C=C(C=C)C)(C)C(=O)C(C)=C1[O-]	Anti-Infective Agents;Chemical Actions and Uses;Therapeutic Uses;Anti-Bacterial Agents;Pharmacologic Actions	Thiolactomycin;Antibiotic 2-200;(+)-Thiolactomycin;(R)-(+)-Thiolactomycin;BRN 4423670;82079-32-1;TLM;(R-(E))-3,5-Dimethyl-4-hydroxy-5-(2-methyl-1,3-butadienyl)-2(5H)-thiophenone;[R-(E)]-4-Hydroxy-3,5-dimethyl-5-(2-methyl-1,3-butadienyl)-2(5H)-thiophenone;2(5H)-Thiophenone, 3,5-dimethyl-4-hydroxy-5-(2-methyl-1,3-butadienyl)-, (R-(E))-;2(5H)-Thiophenone, 4-hydroxy-3,5-dimethyl-5-(2-methyl-1,3-butad…	Transferase;The Structure Of Beta-Ketoacyl-[acyl Carrier Protein] Synthase I In Complex With Thiolactomycin, Implications For Drug Design;Anti-Bacterial Agents;PDB code:1fj4;(2R)-2,4-dimethyl-2-[(1E)-2-methylbuta-1,3-dienyl]-5-oxidanyl-thiophen-3-one;Beta-Ketoacyl-Acp Synthase I (Kas) From E. Coli With Bound Inhibitor Thiolactomycin;Crystal Structure Of Mycobacterium Tuberculosis C171q Kasa Varia…
136	Antibacterial	DB00410	446596	Mupirocin	Miscellaneous	Miscellaneous	Protein	InChI=1S/C26H44O9/c1-16(13-23(30)33-11-9-7-5-4-6-8-10-22(28)29)12-20-25(32)24(31)19(15-34-20)14-21-26(35-21)17(2)18(3)27/h13,17-21,24-27,31-32H,4-12,14-15H2,1-3H3,(H,28,29)/b16-13+/t17-,18-,19-,20-,21-,24+,25-,26-/m0/s1	MINDHVHHQZYEEK-HBBNESRFSA-N	9-[(E)-4-[(2S,3R,4R,5S)-3,4-dihydroxy-5-[[(2S,3S)-3-[(2S,3S)-3-hydroxybutan-2-yl]oxiran-2-yl]methyl]oxan-2-yl]-3-methylbut-2-enoyl]oxynonanoic acid	C26H44O9	6	3	17	0	3	2	1.2578	148.88	0	9	499.621	O1C(CC2COC(CC(=CC(OCCCCCCCCC(=O)[O-])=O)C)C(O)C2O)C1C(C(O)C)C	Mupirocin;Pseudomonic acid;Mupirocine;Bactroban;Mupirocinum;Centany;Mupirocina;Pseudomonic acid A;Bactoderm;Plasimine;Bactroban Nasal;1jzs;Bactroban (TN);Centany (TN);Mupirocine [French];Mupirocinum [Latin];Mupirocina [Spanish];BRL-4910A;Mupirocin (USP/INN);Mupirocin, 14C-Labeled;12650-69-0;CHEMBL719;AC1L9JV4;UNII-D0GX863OA5;BIDD:GT0320;M7694_SIGMA;MLS001074711;BRL 4910A;CHEBI:135271;C26H44O9;DB0…	FDA_Orange_Book;Isoleucyl-Trna Synthetase Complexed With Mupirocin Aminoacyl-Trna Synthetase, Riken Structural GenomicsPROTEOMICS INITIATIVE, RSGI, STRUCTURAL GENOMICS Mol_id: 1; Molecule: Isoleucyl-Trna Synthetase; Chain: A; Ec: 6.1.1.5; Engineered: Yes;Target: isoleucine tRNA ligase inhibitor, ptotein synthesis inhibitor;Sigma Chemical Company:M7694;Protein Synthesis Inhibitors;NCC_SUPPLIER_SAM…	Therapeutic Uses;Chemical Actions and Uses;Enzyme Inhibitors;Molecular Mechanisms of Pharmacological Action;Pharmacologic Actions;Anti-Bacterial Agents;Anti-Infective Agents;Protein Synthesis Inhibitors
137	Antibacterial	DB00698	5353830	Nitrofurantoin	Nitrofuran	Miscellaneous	Nucleic Acid	InChI=1S/C8H6N4O5/c13-6-4-11(8(14)10-6)9-3-5-1-2-7(17-5)12(15)16/h1-3H,4H2,(H,10,13,14)/b9-3-	NXFQHRVNIOXGAQ-OQFOIZHKSA-N	1-[(Z)-(5-nitrofuran-2-yl)methylideneamino]imidazolidine-2,4-dione	C8H6N4O5	3	1	3	0	1	2	0.0735	120.73	4	5	238.159	o1c(ccc1[N+](=O)[O-])C=NN1CC(=O)NC1=O		Furadoxyl;N-Toin;NCI-C08902;NSC-2107;WLN: T5OJ BNW E1UN- AT5NVMV EHJ;Hydantoin, 1-(5-nitro-furfurylideneamino)-;N-(5-Nitro-2-furfurylidene)-1-aminohydantoin;2, 1-[[(5-nitro-2-furanyl)methylene]amino]-;Furantoina;Furadoin;Furanite;Fuamed;Novo-Furantoin;Furophen T-Caps;Apo-Nitrofurantoin;It-Uran;AC1NS4M2;N7878_SIGMA;46502_RIEDEL;46502_FLUKA;NSC-44150;ZINC03875368;DB00698;CAS-67-20-9;NCGC00016298-01…	<a target=_blank href="http://boschesci.com?N5562">Bosche Scientific N5562</A>;"<a target=_blank href=""http://cgi.www.apolloscientific.co.uk/cgi-bin/www.apolloscientific.co.uk/csvread.pl?database=db2&search=BIN0136"">Apollo Scientific BIN0136</A>";"<a target=_blank href=""http://www.hit2lead.com/search.asp?db=SC&ids=5492202"">ChemBridge 5492202</A>";"<a target=_blank href=""mailto:info@alfa.com?…
138	Antibacterial	DB00614	5323714	Furazolidone	Nitrofuran	Miscellaneous	Nucleic Acid	InChI=1S/C8H7N3O5/c12-8-10(3-4-15-8)9-5-6-1-2-7(16-6)11(13)14/h1-2,5H,3-4H2/b9-5+	PLHJDBGFXBMTGZ-WEVVVXLNSA-N	3-[(E)-(5-nitrofuran-2-yl)methylideneamino]-1,3-oxazolidin-2-one	C8H7N3O5	2	0	3	0	0	2	0.9739	100.86	3	5	225.16	O1CCN(N=Cc2oc([N+](=O)[O-])cc2)C1=O	Renal Agents;Antiparasitic Agents;Antiprotozoal Agents;Monoamine Oxidase Inhibitors;Pharmacologic Actions;Anti-Infective Agents, Local;Anti-Infective Agents, Urinary;Chemical Actions and Uses;Enzyme Inhibitors;Molecular Mechanisms of Pharmacological Action;Therapeutic Uses;Anti-Infective Agents;Antitrichomonal Agents	furazolidone;Furazolidine;Furoxone;Nitrofurazolidone;Furazolidon;Nitrofuroxon;Furazol;Nitrofurazolidonum;Furozolidine;Nifulidone;Nifurazolidone;Trichofuron;Tricofuron;Coryzium;Diafuron;Furaxon;Furaxone;Furazon;Furidon;Furoxal;Furoxane;Furoxon;Giardil;Giarlam;Medaron;Nicolen;Optazol;Ortazol;Puradin;Roptazol;Tikofuran;Topazone;Tricoron;Trifurox;Furall;Neftin;Furazolidona;Furazolidonum;Furoxone Swin…	Tumor data;"<a href=""http://ctd.mdibl.org/detail.go?view=disease&type=chem&acc=D005664"">Diseases</a>";Human Data;220;Mechanism of action: Furazolidone and its related free radical products are believed to bind DNA and induce cross-links. Bacterial DNA is particularly susceptible to this drug leading to high levels of mutations (transitions and transversions) in the bacterial chromosome.;Microso…
139	Antibacterial	DB00336	5447130	Nitrofurazone	Nitrofuran	Miscellaneous	Protein	InChI=1S/C6H6N4O4/c7-6(11)9-8-3-4-1-2-5(14-4)10(12)13/h1-3H,(H3,7,9,11)/b8-3+	IAIWVQXQOWNYOU-FPYGCLRLSA-N	[(E)-(5-nitrofuran-2-yl)methylideneamino]urea	C6H6N4O4	1	1	4	0	0	1	0.9741	114.41	4	4	197.13	o1c(ccc1[N+](=O)[O-])C=N[N-]C(=O)N	Pharmacologic Actions;Therapeutic Uses;Chemical Actions and Uses;Anti-Infective Agents	nitrofurazone;Nitrofural;Furacilin;Furacin;Furacillin;Aldomycin;Furacine;5-Nitro-2-furaldehyde semicarbazone;Becafurazone;Biofuracina;Furacinetten;Furacycline;Monafuracin;Monafuracis;Monofuracin;Nitrofurane;Nitrofurazan;Alfucin;Babrocid;Biofurea;Chemofuran;Cocafurin;Coxistat;Dermofural;Dynazone;Eldezol;Fedacin;Flavazone;Fracine;Furacoccid;Furacort;Furaderm;Furagent;Furaldon;Furalone;Furametral;Fu…	FDA_Orange_Book;"<a href=""http://www.tokyokasei.co.jp/catalog/N0200.html"">TCI Japan (Tokyo Kasei Kogyo)</a>";Nitrofurazone is a topical anti-infective agent with an IC50 of 22.83 inverted exclamation markA 1.2 |IM.;Other Functional Groups;the literature. Click on these links to find specific, curated data for this chemical at CTD:;Activity: Anti-infective, topical;Microsource;on human health by…
140	Antibacterial	DB00916	4173	Metronidazole	Miscellaneous	Miscellaneous	Nucleic Acid	InChI=1S/C6H9N3O3/c1-5-7-4-6(9(11)12)8(5)2-3-10/h4,10H,2-3H2,1H3	VAOCPAMSLUNLGC-UHFFFAOYSA-N	2-(2-methyl-5-nitroimidazol-1-yl)ethanol	C6H9N3O3	2	1	3	0	0	1	0.35842	83.87	3	3	171.156	OCCn1c(ncc1[N+](=O)[O-])C	Anti-Infective Agents;Therapeutic Uses;Chemical Actions and Uses;Antiprotozoal Agents;Antiparasitic Agents;Pharmacologic Actions;Radiation-Sensitizing Agents	metronidazole;Flagyl;Metronidazol;Meronidal;Metronidaz;Novonidazol;Trichopol;Trikacide;Trikozol;Vertisal;Arilin;Efloran;Elyzol;Entizol;Trichex;Vagilen;Vagimid;Clont;Klion;Klont;Nalox;Tricowas B;Acromona;Anagiardil;Deflamon;Flagemona;Flagesol;Giatricol;Gineflavir;Protostat;Sanatrichom;Takimetol;Trichazol;Trichocide;Trichomol;Tricocet;Trikamon;Trikojol;Trivazol;Wagitran;Atrivyl;Danizol;Flagil;Mexib…	<a target=_blank href="mailto:sales@ryansci.com?SUBJECT=price and availability of BTB09707">Ryan Scientific BTB09707</A>;"<a target=_blank href=""http://www.ryansci.com/cgi-bin/q22may.cgi?thetype=codenumber&thedata=BTB09707"">Maybridge Building Blocks BTB09707</A>";Classifications: C07C317/22, C07C317/44, C07C323/65, C07D205/04, C07D231/20, C07D233/64, C07D257/04, C07D271/07, C07D401/12, C07D403/…
141	Antibacterial	DB03966	54706138	Chlorobiocin	Aminocoumarin	Miscellaneous	Nucleic Acid	InChI=1S/C35H37ClN2O11/c1-16(2)7-9-18-15-19(10-13-22(18)39)31(42)38-25-26(40)20-11-14-23(24(36)28(20)47-33(25)44)46-34-27(41)29(30(45-6)35(4,5)49-34)48-32(43)21-12-8-17(3)37-21/h7-8,10-15,27,29-30,34,37,39-41H,9H2,1-6H3,(H,38,42)/t27-,29+,30-,34-/m1/s1	FJAQNRBDVKIIKK-LFLQOBSNSA-N	[(3R,4S,5R,6S)-6-[8-chloro-4-hydroxy-3-[[4-hydroxy-3-(3-methylbut-2-enyl)benzoyl]amino]-2-oxochromen-7-yl]oxy-5-hydroxy-3-methoxy-2,2-dimethyloxan-4-yl] 5-methyl-1H-pyrrole-2-carboxylate	C35H37ClN2O11	7	4	11	2	5	5	4.75409	188.7	2	11	696.129	Clc1c2OC(=O)C(NC(=O)c3cc(CC=C(C)C)c(O)cc3)=C([O-])c2ccc1OC1OC(C)(C)C(OC)C(OC(=O)c2[nH]c(cc2)C)C1O	Clorobiocin;Chlorobiocin;Antibiotic RP 18,631;NSC 227186;18631 RP;RP 18631;(3r,4s,5r,6s)-6-[(8-chloro-2-hydroxy-3-{[4-hydroxy-3-(3-methylbut-2-en-1-yl)benzoyl]amino}-4-oxo-4h-chromen-7-yl)oxy]-5-hydroxy-3-methoxy-2,2-dimethyltetrahydro-2h-pyran-4-yl 5-methyl-1h-pyrrole-2-carboxylate(non-preferred name);39868-96-7;1H-Pyrrole-2-carboxylic acid, 5-methyl-, 3'-ester with N-(8-chloro-7-((6-deoxy-5-C-m…	[(3R,4S,5R,6S)-6-[8-chloranyl-3-[[3-(3-methylbut-2-enyl)-4-oxidanyl-phenyl]carbonylamino]-2-oxidanyl-4-oxidanylidene-chromen-7-yl]oxy-3-methoxy-2,2-dimethyl-5-oxidanyl-oxan-4-yl] 5-methyl-1H-pyrrole-2-carboxylate;Coumarins;Crystal Structure Of E. Coli 24kda Domain In Complex With Clorobiocin;Crystal Structure Of E. Coli 24kda Domain In Complex With Clorobiocin Topoisomerase, Gyrase B, Clorobiocin…
142	Antibacterial		6540558	Rifalazil	Ansamycins	Miscellaneous	Nucleic Acid	InChI=1S/C51H64N4O13/c1-24(2)23-54-16-18-55(19-17-54)32-21-33(57)39-35(22-32)67-48-40(52-39)36-37-44(60)30(8)47-38(36)49(62)51(10,68-47)65-20-15-34(64-11)27(5)46(66-31(9)56)29(7)43(59)28(6)42(58)25(3)13-12-14-26(4)50(63)53-41(48)45(37)61/h12-15,20-22,24-25,27-29,34,42-43,46,52,57-60H,16-19,23H2,1-11H3/b13-12+,20-15+,26-14-,53-41?/t25-,27+,28+,29+,34-,42-,43+,46+,51-/m0/s1	SGHWBDUXKUSFOP-KYALZUAASA-N		C51H64N4O13	12	5	6	3	6	7	4.65472	227.42	4	13	942.096	O1c2c3c4c(c(O)c2C)C(=O)C(=NC(=O)C(=CC=CC(C)C(O)C(C)C(O)C(C)C(OC(=O)C)C(C)C(OC)C=COC1(C)C3=O)C)C=1Oc2c(NC=14)c(O)cc(N1CC[NH+](CC1)CC(C)C)c2	Rifalazil;Benzoxazinorifamycin;Krm 1648;KRM-1648;129791-92-0;3'-Hydroxy-5'-(4-isobutylpiperazinyl)benzoxazinorifamycin;Rifalazil [USAN:INN];ABI 1648;Rifamycin viii, 1',4-didehydro-1-deoxy-1,4-dihydro-3'-hydroxy-5'-(4-(2-methylpropyl)-1-piperazinyl)-1-oxo-;Rifamycin VIII, 1',4-didehydro-1-deoxy-1,4-dihydro-3'-hydroxy-5'-[4-(2-methylpropyl)-1-piperazinyl]-1-oxo-;Rifalazil (USAN/INN);KRM-1648 and Yo…	Activity: Antibacterial [antimycobacterial];Benzoxazines;Combinations;LOG P IS EXPERIMENTAL VALUE;Mycins;NIAID ChemDB HIV, Opportunistic Infections and Tuberculosis Therapeutics Database;STRUCTURE NOT AVAILABLE FOR MBST;STRUCTURE NOT AVAILABLE FOR SLPI;YOKUININ STRUCTURE NOT AVAILABLE; COMBINATION	Anti-Infective Agents;Antibiotics, Antitubercular;Chemical Actions and Uses;Leprostatic Agents;Therapeutic Uses;Anti-Bacterial Agents;Antitubercular Agents;Pharmacologic Actions
143	Antibacterial		9853668	Streptovaricin	Ansamycins	Miscellaneous	Nucleic Acid	InChI=1S/C40H51NO14/c1-16-12-11-13-17(2)38(49)41-28-19(4)36(55-23(8)42)24-25(33(28)47)31(45)21(6)35-26(24)34(53-15-54-35)18(3)14-40(9,51)37(48)22(7)32(46)27(39(50)52-10)30(44)20(5)29(16)43/h11-14,16,20,22,27,29-30,32,37,43-46,48,51H,15H2,1-10H3,(H,41,49)/b12-11-,17-13+,18-14+/t16-,20-,22+,27-,29-,30-,32-,37-,40-/m1/s1	FMNPOTNZACJORR-CJQFIEQYSA-N		C40H51NO14	10	6	4	3	4	4	2.3616	241.44	1	14	768.833	O1C2=C3C=4C(=C([O-])C(=C3OC1)C)C(=O)C(NC(=O)C(=CC=CC(C)C(O)C(C)C(O)C(C(OC)=O)C(O)C(C)C(O)C(O)(C=C2C)C)C)=C(C)C=4OC(=O)C	Streptovaricin;CHEMBL1255887		Therapeutic Uses;Antineoplastic Agents;Chemical Actions and Uses;Pharmacologic Actions;Anti-Bacterial Agents;Anti-Infective Agents;Antibiotics, Antineoplastic;Antiviral Agents
144	Antibacterial		34230	Nigericin	Polyether	Miscellaneous	Permeability	InChI=1S/C40H68O11/c1-21-11-12-28(46-33(21)26(6)36(42)43)17-29-18-30(45-10)27(7)40(48-29)25(5)19-38(9,51-40)32-13-14-37(8,49-32)35-23(3)16-31(47-35)34-22(2)15-24(4)39(44,20-41)50-34/h21-35,41,44H,11-20H2,1-10H3,(H,42,43)/t21-,22-,23-,24+,25+,26+,27+,28+,29+,30+,31+,32+,33+,34-,35+,37-,38-,39-,40+/m0/s1	DANUORFCFTYTSZ-SJSJOXFOSA-N	(2R)-2-[(2R,3S,6R)-6-[[(2S,4R,6R,7R,9R,10R)-2-[(2R,5S)-5-[(2R,3S,5R)-5-[(2S,3S,5R,6R)-6-hydroxy-6-(hydroxymethyl)-3,5-dimethyloxan-2-yl]-3-methyloxolan-2-yl]-5-methyloxolan-2-yl]-9-methoxy-2,4,10-trimethyl-1,6-dioxaspiro[4.5]decan-7-yl]methyl]-3-methyloxan-2-yl]propanoic acid	C40H68O11	9	2	9	2	4	6	4.3709	145.2	0	11	723.965	O1C2(OC(CC(OC)C2C)CC2OC(C(C(=O)[O-])C)C(CC2)C)C(CC1(C)C1OC(CC1)(C)C1OC(CC1C)C1OC(O)(CO)C(CC1C)C)C	Ionophores;Anti-Bacterial Agents;Anti-Infective Agents;Therapeutic Uses;Pharmacologic Actions;Chemical Actions and Uses;Membrane Transport Modulators;Molecular Mechanisms of Pharmacological Action;Specialty Uses of Chemicals	nigericin;Polyetherin A;Azalomycin M;Helixin C;Antibiotic K 178;Antibiotic X-464;CHEBI:7569;28380-24-7;BRN 1696755;X-464;(2R)-2-[(2R,3S,6R)-6-{[(2S,4R,5R,7R,9R,10R)-2-{(2S,2'R,3'S,5R,5'R)-5'-[(2S,3S,5R,6R)-6-hydroxy-6-(hydroxymethyl)-3,5-dimethyltetrahydro-2H-pyran-2-yl]-2,3'-dimethyloctahydro-2,2'-bifuran-5-yl}-9-methoxy-2,4,10-trimethyl-1,6-dioxaspiro[4.5]dec-7-yl]methyl}-3-methyltetrahydro-2H-…	Natural Product;"Substance included in EPA DSSTox GEOGSE: National Center for Biotechnology Information (NCBI) Gene Expression Omnibus (GEO) Series Experiment Structure-Index Locator File <a href=""http://www.epa.gov/ncct/dsstox/sdf_geogse.html""target=""_blank"">[link to DSSTox SDF Download Page]</a>";Ionophores;NIAID ChemDB HIV, Opportunistic Infections and Tuberculosis Therapeutics Database;St…
145	Antibacterial		65452	Narasin A	Polyether	Miscellaneous	Permeability	InChI=1S/C43H72O11/c1-12-30(35(46)27(8)34(45)28(9)36-23(4)21-24(5)37(51-36)31(13-2)39(47)48)38-25(6)22-26(7)42(52-38)18-15-32(44)43(54-42)20-19-40(11,53-43)33-16-17-41(49,14-3)29(10)50-33/h15,18,23-34,36-38,44-45,49H,12-14,16-17,19-22H2,1-11H3,(H,47,48)/t23-,24-,25-,26+,27-,28-,29-,30-,31+,32+,33+,34+,36+,37+,38-,40-,41+,42-,43-/m0/s1	VHKXXVVRRDYCIK-CWCPJSEDSA-N	(2R)-2-[(2R,3S,5S,6R)-6-[(2S,3S,4S,6R)-6-[(3S,5S,7R,9S,10S,12R,15R)-3-[(2R,5R,6S)-5-ethyl-5-hydroxy-6-methyloxan-2-yl]-15-hydroxy-3,10,12-trimethyl-4,6,8-trioxadispiro[4.1.5^{7}.3^{5}]pentadec-13-en-9-yl]-3-hydroxy-4-methyl-5-oxooctan-2-yl]-3,5-dimethyloxan-2-yl]butanoic acid	C43H72O11	9	3	12	3	5	5	5.0993	164.04	0	11	764.03	O1C(C(CC)C(=O)[O-])C(CC(C)C1C(C(O)C(C(=O)C(CC)C1OC2(OC3(OC(CC3)(C)C3OC(C)C(O)(CC3)CC)C(O)C=C2)C(CC1C)C)C)C)C	Therapeutic Uses;Antiprotozoal Agents;Antiparasitic Agents;Chemical Actions and Uses;Coccidiostats;Pharmacologic Actions;Anti-Bacterial Agents;Anti-Infective Agents	Narasin A;Monteban;narasin;4-Methylsalinomycin;Compound 79891;Antibiotic C 7819B;Narasine [INN-French];Narasinum [INN-Latin];Narasino [INN-Spanish];Antibiotic A 28086A;Lilly 79891;Antibiotic A-28086 factor A;Salinomycin, 4-methyl-, (4S);C 7819B;BRN 1678311;A 28086A;AI3-29798;2H-Pyran-2-acetic acid, alpha-ethyl-6-(5-(2-(5-ethyltetrahydro-5-hydroxy-6-methyl-2H-pyran-2-yl)-15-hydroxy-2,10,12-trimeth…	Anti-Infective Agents;Coccidiostats;Drug / Therapeutic Agent;Natural Product;(2R)-2-[(2R,3S,5S,6R)-6-[(2S,3S,4S,6R)-6-[(3S,5S,7R,9S,10S,12R,15R)-3-[(2R,5R,6S)-5-ethyl-6-methyl-5-oxidanyl-oxan-2-yl]-3,10,12-trimethyl-15-oxidanyl-4,6,8-trioxadispiro[4.1.5^{7}.3^{5}]pentadec-13-en-9-yl]-4-methyl-3-oxidanyl-5-oxidanylidene-octan-2-yl]-3,5-dimethyl-oxan-2-yl]butanoic acid;Anti-Bacterial Agents;Antipar…
146	Antibacterial		5360807	Lasalocid	Miscellaneous	Miscellaneous	Permeability	InChI=1S/C34H54O8/c1-9-25(31-21(6)18-34(11-3,42-31)26-16-17-33(40,10-2)23(8)41-26)30(37)22(7)28(35)19(4)12-14-24-15-13-20(5)29(36)27(24)32(38)39/h13,15,19,21-23,25-26,28,31,35-36,40H,9-12,14,16-18H2,1-8H3,(H,38,39)/t19-,21+,22+,23+,25+,26-,28+,31+,33-,34+/m1/s1	BBMULGJBVDDDNI-OWKLGTHSSA-N	6-[(3R,4S,5S,7R)-7-[(2S,3S,5S)-5-ethyl-5-[(2R,5R,6S)-5-ethyl-5-hydroxy-6-methyloxan-2-yl]-3-methyloxolan-2-yl]-4-hydroxy-3,5-dimethyl-6-oxononyl]-2-hydroxy-3-methylbenzoic acid	C34H54O8	6	3	13	1	3	3	4.50749	136.35	0	8	589.79	O1C(CC(C)C1C(C(=O)C(C(O)C(CCc1ccc(C)c(O)c1C(=O)[O-])C)C)CC)(CC)C1OC(C)C(O)(CC1)CC	Chemical Actions and Uses;Molecular Mechanisms of Pharmacological Action;Therapeutic Uses;Anti-Bacterial Agents;Anti-Infective Agents;Ionophores;Membrane Transport Modulators;Specialty Uses of Chemicals;Antiparasitic Agents;Antiprotozoal Agents;Coccidiostats;Pharmacologic Actions	lasalocid;Lasalocid A;Lasalocide;Lasalocide A;Ionophore X 537A;Antibiotic X 537A;Lasalocide [INN-French];Lasalocidum [INN-Latin];Lasalocido [INN-Spanish];EINECS 247-401-9;X 537A;Avatec;NSC 243048;25999-31-9;(2R-(2alpha(2S*(3R*,4S*,5S*,7R*)3S*,5S*),5alpha,6beta))-6-(7-(5-Ethyl-5-(5-ethyltetrahydro-5-hydroxy-6-methyl-2H-pyran-2-yl)tetrahydro-3-methyl-2-furyl)-4-hydroxy-3,5-dimethyl-6-oxononyl)-3-me…	6-[(3R,4S,5S,7R)-7-[(2S,3S,5S)-5-ethyl-5-[(2R,5R,6S)-5-ethyl-6-methyl-5-oxidanyl-oxan-2-yl]-3-methyl-oxolan-2-yl]-3,5-dimethyl-4-oxidanyl-6-oxidanylidene-nonyl]-3-methyl-2-oxidanyl-benzoic acid;Activity: Coccidiostat [for poultry];Anti-Bacterial Agents;Anti-Infective Agents;Antiparasitic Agents;Antiprotozoal Agents;Benzoic Acids;Coccidiostats;Drug / Therapeutic Agent;InChIKey: BBMULGJBVDDDNI-OWKL…
147	Antibacterial		72370	Salinomycin	Miscellaneous	Miscellaneous	Permeability	InChI=1S/C42H70O11/c1-11-29(38(46)47)31-15-14-23(4)36(50-31)27(8)34(44)26(7)35(45)30(12-2)37-24(5)22-25(6)41(51-37)19-16-32(43)42(53-41)21-20-39(10,52-42)33-17-18-40(48,13-3)28(9)49-33/h16,19,23-34,36-37,43-44,48H,11-15,17-18,20-22H2,1-10H3,(H,46,47)/t23-,24-,25+,26-,27-,28-,29+,30-,31?,32+,33+,34+,36+,37-,39-,40+,41+,42+/m0/s1	KQXDHUJYNAXLNZ-SDCJTGBBSA-N	(2R)-2-[(5S,6R)-6-[(2S,3S,4S,6R)-6-[(3S,5R,7S,9S,10S,12R,15R)-3-[(2R,5R,6S)-5-ethyl-5-hydroxy-6-methyloxan-2-yl]-15-hydroxy-3,10,12-trimethyl-4,6,8-trioxadispiro[4.1.5^{7}.3^{5}]pentadec-13-en-9-yl]-3-hydroxy-4-methyl-5-oxooctan-2-yl]-5-methyloxan-2-yl]butanoic acid	C42H70O11	9	3	12	2	5	5	4.8533	164.04	0	11	750.003	O1C(CCC12OC1(OC(C(C(=O)C(C(O)C(C)C3OC(CCC3C)C(CC)C(=O)[O-])C)CC)C(CC1C)C)C=CC2O)(C)C1OC(C)C(O)(CC1)CC	salinomycin;Coxistac;Bio-cox;Salinomycine [INN-French];Salinomycinum [INN-Latin];Salinomicina [INN-Spanish];HSDB 7032;AHR 3096;EINECS 258-290-1;K 364;(2r)-2-{(5s,6r)-6-[(2s,3s,4s,6r)-6-{(2s,5r,7s,9s,10s,12r,15r)-2-[(2r,5r,6s)-5-ethyl-5-hydroxy-6-methyltetrahydro-2h-pyran-2-yl]-15-hydroxy-2,10,12-trimethyl-1,6,8-trioxadispiro[4.1.5.3]pentadec-13-en-9-yl}-3-hydroxy-4-methyl-5-oxooctan-2-yl]-5-methy…	(2R)-2-[(5S,6R)-6-[(2S,3S,4S,6R)-6-[(3S,5R,7S,9S,10S,12R,15R)-3-[(2R,5R,6S)-5-ethyl-6-methyl-5-oxidanyl-oxan-2-yl]-3,10,12-trimethyl-15-oxidanyl-4,6,8-trioxadispiro[4.1.5^{7}.3^{5}]pentadec-13-en-9-yl]-4-methyl-3-oxidanyl-5-oxidanylidene-octan-2-yl]-5-methyl-oxan-2-yl]butanoic acid;Anti-Bacterial Agents;Anti-Infective Agents;Antiparasitic Agents;Antiprotozoal Agents;Coccidiostats;Drug / Therapeut…	Chemical Actions and Uses;Anti-Bacterial Agents;Anti-Infective Agents;Antiparasitic Agents;Coccidiostats;Pharmacologic Actions;Antiprotozoal Agents;Therapeutic Uses
148	Antibacterial		11957499	Calcimycin	Miscellaneous	Miscellaneous	Permeability	InChI=1S/C29H37N3O6/c1-15-10-11-29(17(3)13-16(2)27(38-29)18(4)26(33)20-7-6-12-31-20)37-22(15)14-23-32-25-21(36-23)9-8-19(30-5)24(25)28(34)35/h6-9,12,15-18,22,27,30-31H,10-11,13-14H2,1-5H3,(H,34,35)/t15-,16-,17-,18-,22-,27+,29+/m1/s1	HIYAVKIYRIFSCZ-CYEMHPAKSA-N	5-(methylamino)-2-[[(2S,3R,5R,6S,8R,9R)-3,5,9-trimethyl-2-[(2S)-1-oxo-1-(1H-pyrrol-2-yl)propan-2-yl]-1,7-dioxaspiro[5.5]undecan-8-yl]methyl]-1,3-benzoxazole-4-carboxylic acid	C29H37N3O6	4	2	7	1	4	5	4.19507	129.51	3	6	522.622	O1C(Cc2oc3c(n2)c(C(=O)[O-])c(NC)cc3)C(CCC12OC(C(C(=O)c1[nH]ccc1)C)C(CC2C)C)C	Anti-Infective Agents;Calcium Ionophores;Ionophores;Therapeutic Uses;Chemical Actions and Uses;Molecular Mechanisms of Pharmacological Action;Anti-Bacterial Agents;Membrane Transport Modulators;Pharmacologic Actions;Specialty Uses of Chemicals	Calcimycin;Calimycin;Antibiotic A 23187;Calcium ionophore A23187;Calcium ionophore III;Calcimycin A23187;Lopac0_000317;MLS001056783;C7522_SIGMA;CHEMBL1256686;21186_FLUKA;MolPort-003-927-819;HMS2231L17;HMS3260P16;CCG-204412;A23187; Calcium ionophore A23187;NCGC00025064-02;NCGC00025064-03;NCGC00025064-04;SMR000326983;EU-0100317;C 7522;BRD-K41431477-001-05-6	Sigma-Aldrich:C 7522;Compound from LOPAC (Sigma);MLSMR_SUPPLIER_STRUCTURE_ID: C7522;MLSMR_COMPOUND_CLASS: NP SS;MLSMR_SAMPLE_SUPPLIER: Sigma Chemical Company;BIOA;http://mlsmr.evotec.com/MLSMR_HomePage/pdf/pubchem_reference.pdf;Sigma Chemical Company:C7522
149	Antibacterial	DB00845	2794	Clofazimine	Miscellaneous	Miscellaneous	Protein	InChI=1S/C27H22Cl2N4/c1-17(2)30-24-16-27-25(15-23(24)31-20-11-7-18(28)8-12-20)32-22-5-3-4-6-26(22)33(27)21-13-9-19(29)10-14-21/h3-17,31H,1-2H3	WDQPAMHFFCXSNU-UHFFFAOYSA-N	N,5-bis(4-chlorophenyl)-3-propan-2-yliminophenazin-2-amine	C27H22Cl2N4	2	1	4	1	3	5	7.9605	39.99	4	0	473.407	Clc1ccc(N2C3=CC(=NC(C)C)C(Nc4ccc(Cl)cc4)=CC3=Nc3c2cccc3)cc1	Analgesics, Non-Narcotic;Anti-Bacterial Agents;Anti-Infective Agents;Anti-Inflammatory Agents;Anti-Inflammatory Agents, Non-Steroidal;Antirheumatic Agents;Coloring Agents;Laboratory Chemicals;Sensory System Agents;Therapeutic Uses;Analgesics;Chemical Actions and Uses;Leprostatic Agents;Specialty Uses of Chemicals;Peripheral Nervous System Agents;Pharmacologic Actions;Physiological Effects of Drugs	clofazimine;Lamprene;Lampren;Chlofazimine;Clofazimina;Clofaziminum;2030-63-9;B 663 (Pharmaceutical);Clofaziminum [INN-Latin];Clofazimina [INN-Spanish];B-663;NSC-141046;Lamprene (TN);Prestwick_685;G 30320;B 663, pharmaceutical;AC1L1EHE;B 663 (VAN);Prestwick0_000376;Prestwick1_000376;Prestwick2_000376;Prestwick3_000376;EINECS 217-980-2;NSC141046;UNII-D959AE5USF;NSC 141046;BRN 0060420;CHEMBL1292;BID…	Activity: Antibacterial [tuberculostatic]; Antibacterial [leprostatic] [DS:H00344];Anti-inflammatory agents, non-steroidal;the literature. Click on these links to find specific, curated data for this chemical at CTD:;"Same as: <a href=""http://pubchem.ncbi.nlm.nih.gov/summary/summary.cgi?sid=7847344"">D00278</a>";"<a href=""http://ctd.mdibl.org/detail.go?view=gene&type=chem&acc=D002991"">Genes an…
150	Antibacterial	DB04124	54708737	Aurodox	Miscellaneous	Miscellaneous	Protein	InChI=1S/C44H62N2O12/c1-10-12-14-22-32-43(6,7)39(51)40(52)44(55,58-32)29(11-2)41(53)45-24-18-17-20-27(4)37(56-9)28(5)38-36(50)35(49)31(57-38)21-16-13-15-19-26(3)34(48)33-30(47)23-25-46(8)42(33)54/h10,12-23,25,28-29,31-32,35-40,48-52,55H,11,24H2,1-9H3,(H,45,53)/b12-10-,15-13+,18-17+,21-16+,22-14+,26-19+,27-20+,34-33+/t28-,29-,31-,32?,35?,36?,37-,38+,39?,40?,44?/m1/s1	NJLYFHQZGXUQAQ-DGDIGVOGSA-N	(2S)-N-[(2E,4E,6S,7R)-7-[(2S,5R)-3,4-dihydroxy-5-[(1E,3E,5E,7E)-7-hydroxy-6-methyl-7-(1-methyl-2,4-dioxopyridin-3-ylidene)hepta-1,3,5-trienyl]oxolan-2-yl]-6-methoxy-5-methylocta-2,4-dienyl]-2-[2,3,4-trihydroxy-5,5-dimethyl-6-[(1E,3Z)-penta-1,3-dienyl]oxan-2-yl]butanamide	C44H62N2O12	9	6	17	3	4	3	3.0374	218.38	2	12	809.974	O1C(O)(C(CC)C(=O)NCC=CC=C(C(OC)C(C)C2OC(C=CC=CC=C(C([O-])=C3C(=O)C=CN(C)C3=O)C)C(O)C2O)C)C(O)C(O)C(C)(C)C1C=CC=CC	aurodox;Goldinodox;Goldinomycin;1-Methylmocimycin;Antibiotic X-5108;Mocimycin, 1-methyl-;NSC 233989;X 5108;AC1O5GG1;(2S)-N-[(2E,4E,6S,7R)-7-[(2S,5R)-3,4-dihydroxy-5-[(1E,3E,5E)-7-(2-hydroxy-1-methyl-4-oxopyridin-3-yl)-6-methyl-7-oxohepta-1,3,5-trienyl]oxolan-2-yl]-6-methoxy-5-methylocta-2,4-dienyl]-2-[2,3,4-trihydroxy-5,5-dimethyl-6-[(1E,3Z)-penta-1,3-dienyl]oxan-2-yl]butanamide;12704-90-4	(2S)-2-[5,5-dimethyl-2,3,4-tris(oxidanyl)-6-[(1E,3Z)-penta-1,3-dienyl]oxan-2-yl]-N-[(2E,4E,6S,7R)-6-methoxy-5-methyl-7-[(2S,5R)-5-[(1E,3E,5E)-6-methyl-7-(1-methyl-2-oxidanyl-4-oxidanylidene-pyridin-3-yl)-7-oxidanylidene-hepta-1,3,5-trienyl]-3,4-bis(oxidanyl)oxolan-2-yl]octa-2,4-dienyl]butanamide;Anti-Infective Agents;Drug / Therapeutic Agent;Natural Product;Anti-Bacterial Agents	Anti-Bacterial Agents;Pharmacologic Actions;Anti-Infective Agents;Chemical Actions and Uses;Therapeutic Uses
151	Antibacterial	DB07374	253602	Anisomycin	Miscellaneous	Miscellaneous	Protein	InChI=1S/C14H19NO4/c1-9(16)19-14-12(15-8-13(14)17)7-10-3-5-11(18-2)6-4-10/h3-6,12-15,17H,7-8H2,1-2H3/t12-,13+,14+/m1/s1	YKJYKKNCCRKFSL-RDBSUJKOSA-N	[(2R,3S,4S)-4-hydroxy-2-[(4-methoxyphenyl)methyl]pyrrolidin-3-yl] acetate	C14H19NO4	3	1	5	0	0	2	-0.52413	72.37	1	4	266.317	O(C(=O)C)C1C([NH2+]CC1O)Cc1ccc(OC)cc1	Anti-Bacterial Agents;Anti-Infective Agents;Nucleic Acid Synthesis Inhibitors;Protein Synthesis Inhibitors;Chemical Actions and Uses;Molecular Mechanisms of Pharmacological Action;Therapeutic Uses;Antiparasitic Agents;Antiprotozoal Agents;Enzyme Inhibitors;Pharmacologic Actions	Flagecidin;anisomycin;Upjohn 204t3;TCMDC-125504;NSC76712;CHEBI:338412;Anisomycin from Streptomyces griseolus;2-(p-Methoxybenzyl)-3,4-pyrrolidinediol 3-acetate;22862-76-6;(-)-Anisomycin;(2R,3S,4S)-4-hydroxy-2-(4-methoxybenzyl)pyrrolidin-3-yl acetate;1,4,5-Trideoxy-1,4-imino-5-(p-methoxyphenyl)-D-xylo-pentitol 3-acetate;Antibiotic PA-106;ANM;GNF-Pf-4549;2-p-Methoxyphenylmethyl-3-acetoxy-4-hydroxypy…	MLSMR_SUPPLIER_STRUCTURE_ID: A9789;NIAID ChemDB HIV, Opportunistic Infections and Tuberculosis Therapeutics Database;MLSMR_SUPPLIER_SAMPLE_COMMENTS: Toxic if swallowed.;Protein synthesis inhibitors;538980348;Deposition record created from database Chemistry on host DrZZLaptop on Oct 30, 2011;PDB Accession Code 1K73;Nucleic acid synthesis inhibitors;Antiparasitic Agents;MLSMR_SAMPLE_SUPPLIER: Sigm…
152	Antibacterial	DB04310	443600	Actinonin	Miscellaneous	Miscellaneous	Protein	InChI=1S/C19H35N3O5/c1-4-5-6-8-14(11-16(24)21-27)18(25)20-17(13(2)3)19(26)22-10-7-9-15(22)12-23/h13-15,17,23,27H,4-12H2,1-3H3,(H,20,25)(H,21,24)/t14-,15+,17+/m1/s1	XJLATMLVMSFZBN-VYDXJSESSA-N	(2R)-N'-hydroxy-N-[(2S)-1-[(2S)-2-(hydroxymethyl)pyrrolidin-1-yl]-3-methyl-1-oxobutan-2-yl]-2-pentylbutanediamide	C19H35N3O5	3	3	14	0	1	1	1.3111	121.8	3	5	384.497	OCC1N(CCC1)C(=O)C(NC(=O)C(CCCCC)CC(=O)N[O-])C(C)C	Chemical Actions and Uses;Pharmacologic Actions;Therapeutic Uses;Anti-Bacterial Agents;Anti-Infective Agents	actinonin;Actinonine;Octanohydroxamic acid, 3-((1-((2-(hydroxymethyl)-1-pyrrolidinyl)carbonyl)-2-methylpropyl)carbamoyl)-;13434-13-4;BB2;Butanediamide, N4-hydroxy-N1-(1-((2-(hydroxymethyl)-1-pyrrolidinyl)carbonyl)-2-methylpropyl)-2-pentyl-, stereoisomer;Spectrum2_000628;Spectrum3_000680;Spectrum4_001932;Spectrum5_000728;AC1L9EW8;Lopac0_000010;BSPBio_002379;KBioGR_002305;DivK1c_001024;SPBio_000596…	Crystal Structure Of E.Coli Peptide Deformylase Complexed With Antibiotic Actinonin;Crystal Structure Of Peptide Deformylase From Ehrlichia Chaf Complex With Actinonin Ssgcid, Peptide Deformylase, Actinonin, Ehrlichia Chaffeensi Structural Genomics, Seattle Structural Genomics Center For Infectious Disease, Hydrolase-Hydrolase Inhibtior Complex Mol_id: 1; Molecule: Peptide Deformylase 1; Chain: A…
153	Antibacterial		5282055	Tunicamycin	Miscellaneous	Miscellaneous	Protein	InChI=1S/C30H46N4O16/c1-11(2)5-4-6-16(38)32-19-23(43)20(40)14(47-29(19)50-28-18(31-12(3)36)22(42)21(41)15(10-35)48-28)9-13(37)26-24(44)25(45)27(49-26)34-8-7-17(39)33-30(34)46/h4,6-8,11,13-15,18-29,35,37,40-45H,5,9-10H2,1-3H3,(H,31,36)(H,32,38)(H,33,39,46)/b6-4+/t13?,14-,15-,18-,19-,20+,21-,22-,23-,24+,25-,26-,27-,28-,29-/m1/s1	ZHSGGJXRNHWHRS-PEALBESXSA-N	(E)-N-[(2R,3R,4R,5R,6R)-2-[(2R,3R,4R,5S,6R)-3-acetamido-4,5-dihydroxy-6-(hydroxymethyl)oxan-2-yl]oxy-6-[2-[(2R,3S,4R,5R)-5-(2,4-dioxopyrimidin-1-yl)-3,4-dihydroxyoxolan-2-yl]-2-hydroxyethyl]-4,5-dihydroxyoxan-3-yl]-5-methylhex-2-enamide	C30H46N4O16	16	11	14	3	5	4	-5.2563	306.37	4	16	718.71	O1C(C(O)CC2OC(OC3OC(CO)C(O)C(O)C3NC(=O)C)C(NC(=O)C=CCC(C)C)C(O)C2O)C(O)C(O)C1N1C=CC(=O)NC1=O	Chemical Actions and Uses;Anti-Infective Agents;Therapeutic Uses;Anti-Bacterial Agents;Antiviral Agents;Pharmacologic Actions	AC1NQZF7;C12063;11089-65-9;(E)-N-[(2R,3R,4R,5R,6R)-2-[(2R,3R,4R,5S,6R)-3-acetamido-4,5-dihydroxy-6-(hydroxymethyl)oxan-2-yl]oxy-6-[2-[(2R,3S,4R,5R)-5-(2,4-dioxopyrimidin-1-yl)-3,4-dihydroxyoxolan-2-yl]-2-hydroxyethyl]-4,5-dihydroxyoxan-3-yl]-5-methylhex-2-enamide	(E)-N-[(2R,3R,4R,5R,6R)-2-[(2R,3R,4R,5S,6R)-3-acetamido-6-(hydroxymethyl)-4,5-bis(oxidanyl)oxan-2-yl]oxy-6-[2-[(2R,3S,4R,5R)-5-[2,4-bis(oxidanylidene)pyrimidin-1-yl]-3,4-bis(oxidanyl)oxolan-2-yl]-2-oxidanyl-ethyl]-4,5-bis(oxidanyl)oxan-3-yl]-5-methyl-hex-2-enamide
154	Antibacterial	DB07348	5287620	Brefeldin A	Macrolide	Macrolide	Protein	InChI=1S/C16H24O4/c1-11-5-3-2-4-6-12-9-13(17)10-14(12)15(18)7-8-16(19)20-11/h4,6-8,11-15,17-18H,2-3,5,9-10H2,1H3/b6-4+,8-7+/t11-,12+,13-,14+,15+/m0/s1	KQNZDYYTLMIZCT-KQPMLPITSA-N	(1S,2E,7S,10E,12R,13R,15S)-12,15-dihydroxy-7-methyl-8-oxabicyclo[11.3.0]hexadeca-2,10-dien-9-one	C16H24O4	3	2	0	0	0	2	1.9624	66.76	0	4	280.364	O1C(CCCC=CC2C(CC(O)C2)C(O)C=CC1=O)C	Anti-Infective Agents;Antifungal Agents;Therapeutic Uses;Chemical Actions and Uses;Enzyme Inhibitors;Molecular Mechanisms of Pharmacological Action;Anti-Bacterial Agents;Antiviral Agents;Pharmacologic Actions;Protein Synthesis Inhibitors	Ascotoxin;Decumbin;Cyanein;brefeldin A;Nectrolide;Synergisidin;Cyanaein;CHEBI:48080;Brefeldin-?A;Pfizer B 174987;Antibiotic from Penicillium cyaneum;60132-23-2;MLS002701937;MLS002702862;Bredfeldin A;NSC 56310;NSC-89671;NSC107456;NSC244390;20350-15-6;AFB;Brefeldin A prodrug;(+)-Brefeldin A;AC1NR9ZR;B 174987;Probes1_000313;MLS001074108;MLS002153500;Ambotz20350-15-6;B6542_SIGMA;B7651_SIGMA;CHEMBL199…	Groups: experimental;Anti-Bacterial Agents;Biomol;Drug / Therapeutic Agent;http://mlsmr.evotec.com/MLSMR_HomePage/pdf/pubchem_reference.pdf;Protein synthesis inhibitors;DTP/NCI DIS cdk 1.4.4. Release-October 2011.;(1S,2E,7S,10E,12R,13R,15S)-7-methyl-12,15-bis(oxidanyl)-8-oxabicyclo[11.3.0]hexadeca-2,10-dien-9-one;Enzyme Inhibitors;Antifungal Agents;Anti-Infective Agents;MLSMR_SUPPLIER_STRUCTURE_I…
155	Antibacterial		54682466	Mocimycin	Miscellaneous	Miscellaneous	Protein	InChI=1S/C43H60N2O12/c1-9-11-13-21-31-42(6,7)38(50)39(51)43(54,57-31)28(10-2)40(52)44-23-17-16-19-26(4)36(55-8)27(5)37-35(49)34(48)30(56-37)20-15-12-14-18-25(3)33(47)32-29(46)22-24-45-41(32)53/h9,11-22,24,27-28,30-31,34-39,47-51,54H,10,23H2,1-8H3,(H,44,52)(H,45,53)/b11-9+,14-12+,17-16+,20-15+,21-13+,25-18+,26-19+,33-32+	LWXUPCAADQWXRE-KDBYTMBUSA-N	N-[(2E,4E)-7-[5-[(1E,3E,5E,7E)-7-(2,4-dioxo-1H-pyridin-3-ylidene)-7-hydroxy-6-methylhepta-1,3,5-trienyl]-3,4-dihydroxyoxolan-2-yl]-6-methoxy-5-methylocta-2,4-dienyl]-2-[2,3,4-trihydroxy-5,5-dimethyl-6-[(1E,3E)-penta-1,3-dienyl]oxan-2-yl]butanamide	C43H60N2O12	9	7	17	3	4	3	2.6952	227.17	2	12	795.947	O1C(O)(C(CC)C(=O)NCC=CC=C(C(OC)C(C)C2OC(C=CC=CC=C(C([O-])=C3C(=O)C=CNC3=O)C)C(O)C2O)C)C(O)C(O)C(C)(C)C1C=CC=CC	Mocimycin;Antibiotic MYC 8003;Mocimycine [INN-French];Mocimycinum [INN-Latin];Mocimicina [INN-Spanish];Delvomycin;MYC 8003;EINECS 256-859-9;KIRROMYCIN;NSC 316094;Mocimicina;Mocimycine;Mocimycinum;Mocimycin [USAN:INN];AC1NZW5M;Mocimycin (trivial name);UNII-PO3AA461HS;50935-71-2;C43H60N2O12;LS-91551;11130-56-6;Antibiotic obtained from cultures of Streptomyces ramocissimus or the same substance obta…	2-[5,5-dimethyl-2,3,4-tris(oxidanyl)-6-[(1E,3E)-penta-1,3-dienyl]oxan-2-yl]-N-[(2E,4E)-6-methoxy-5-methyl-7-[5-[(1E,3E,5E)-6-methyl-7-oxidanylidene-7-(2-oxidanyl-4-oxidanylidene-1H-pyridin-3-yl)hepta-1,3,5-trienyl]-3,4-bis(oxidanyl)oxolan-2-yl]octa-2,4-dienyl]butanamide;Anti-Bacterial Agents;Anti-Infective Agents;Drug / Therapeutic Agent;Natural Product	Chemical Actions and Uses;Pharmacologic Actions;Therapeutic Uses;Anti-Bacterial Agents;Anti-Infective Agents
156	Antibacterial		54676086	Efrotomycin	Miscellaneous	Miscellaneous	Protein	InChI=1S/C59H88N2O20/c1-15-17-19-27-39-58(8,9)53(80-56-45(67)50(74-13)49(35(7)76-56)79-57-51(75-14)44(66)48(73-12)34(6)77-57)52(68)59(71,81-39)36(16-2)54(69)60-29-23-22-25-32(4)46(72-11)33(5)47-43(65)42(64)38(78-47)26-21-18-20-24-31(3)41(63)40-37(62)28-30-61(10)55(40)70/h15,17-28,30,33-36,38-39,42-53,56-57,63-68,71H,16,29H2,1-14H3,(H,60,69)/b17-15+,20-18+,23-22+,26-21+,27-19+,31-24+,32-25+,41-40+	ZLECMEJICSWJLT-LIWMBINXSA-N	2-[2,3-dihydroxy-4-[3-hydroxy-5-(4-hydroxy-3,5-dimethoxy-6-methyloxan-2-yl)oxy-4-methoxy-6-methyloxan-2-yl]oxy-5,5-dimethyl-6-[(1E,3E)-penta-1,3-dienyl]oxan-2-yl]-N-[(2E,4E)-7-[3,4-dihydroxy-5-[(1E,3E,5E,7E)-7-hydroxy-6-methyl-7-(1-methyl-2,4-dioxopyridin-3-ylidene)hepta-1,3,5-trienyl]oxolan-2-yl]-6-methoxy-5-methylocta-2,4-dienyl]butanamide	C59H88N2O20	17	7	24	3	5	5	2.7033	303.22	2	20	1144.34	O1C(O)(C(CC)C(=O)NCC=CC=C(C(OC)C(C)C2OC(C=CC=CC=C(C([O-])=C3C(=O)C=CN(C)C3=O)C)C(O)C2O)C)C(O)C(OC2OC(C)C(OC3OC(C)C(OC)C(O)C3OC)C(OC)C2O)C(C)(C)C1C=CC=CC	Efrotomycin;Producil;Antibiotic FR 02A;Efrotomycine [French];Efrotomicina [Spanish];FR 02A;MK-621;BRN 5230192;56592-32-6;Mocimycin, 31-O-(6-deoxy-4-O-(6-deoxy-2,4-di-O-methyl-alpha-L-mannopyranosyl)-3-O-methyl-beta-D-allopyranosyl)-1-methyl-;Efrotomicina;Efrotomycine;AC1O5KYR;UNII-5BPJ82Q45X;Efrotomycin [USAN:BAN:INN];C59H88N2O20;LS-91552;Efrotomycin, BRN 5230192, Antibiotic FR 02A, Producil;(alp…	2-[4-[5-(3,5-dimethoxy-6-methyl-4-oxidanyl-oxan-2-yl)oxy-4-methoxy-6-methyl-3-oxidanyl-oxan-2-yl]oxy-5,5-dimethyl-2,3-bis(oxidanyl)-6-[(1E,3E)-penta-1,3-dienyl]oxan-2-yl]-N-[(2E,4E)-6-methoxy-5-methyl-7-[5-[(1E,3E,5E)-6-methyl-7-(1-methyl-2-oxidanyl-4-oxidanylidene-pyridin-3-yl)-7-oxidanylidene-hepta-1,3,5-trienyl]-3,4-bis(oxidanyl)oxolan-2-yl]octa-2,4-dienyl]butanamide;Anti-Bacterial Agents;Anti…	Anti-Bacterial Agents;Anti-Infective Agents;Therapeutic Uses;Chemical Actions and Uses;Pharmacologic Actions
157	Antibacterial	DB00615	6323490	Rifabutin	Ansamycins	Miscellaneous	RNA Polymerase	InChI=1S/C46H62N4O11/c1-22(2)21-50-18-16-46(17-19-50)48-34-31-32-39(54)28(8)42-33(31)43(56)45(10,61-42)59-20-15-30(58-11)25(5)41(60-29(9)51)27(7)38(53)26(6)37(52)23(3)13-12-14-24(4)44(57)47-36(40(32)55)35(34)49-46/h12-15,20,22-23,25-27,30,37-38,41,49,52-54H,16-19,21H2,1-11H3,(H,47,57)/b13-12+,20-15+,24-14-/t23-,25+,26+,27+,30-,37-,38+,41+,45-/m0/s1	ATEBXHFBFRCZMA-VXTBVIBXSA-N		C46H62N4O11	11	5	5	3	5	6	3.19862	206.75	4	11	848.027	O1c2c3c4c(c(O)c2C)C(=O)C(NC(=O)C(=CC=CC(C)C(O)C(C)C(O)C(C)C(OC(=O)C)C(C)C(OC)C=COC1(C)C3=O)C)=C1NC2(N=C14)CC[NH+](CC2)CC(C)C	Anti-Bacterial Agents;Anti-Infective Agents;Antibiotics, Antitubercular;Pharmacologic Actions;Therapeutic Uses;Chemical Actions and Uses;Antitubercular Agents	RIFABUTIN;Ansamycin;Ansatipine;Mycobutin;Ansatipin;Rifabutine;Alfacid;Antibiotic LM 427;Rifabutine [French];Rifabutinum;Rifabutinum [Latin];Rifabutina;Rifabutina [Spanish];LM 427;LM-427;72559-06-9;Assatipin;DRG-0085;Mycobutin (TN);S1741_Selleck;CHEBI:45367;HSDB 3577;LM427;Prestwick2_001109;4-N-isobutylspiropiperidylrifamycin S;BRN 3584778;Rifabutin (JAN/USP/INN);UNII-1W306TDA6S;Rifabutin [USAN:BA…	Antibiotics, antitubercular;"<a href=""http://ctd.mdibl.org/detail.go?view=gene&type=chem&acc=D017828"">Genes and Proteins</a>";Mycins;"For further information visit GEO Series Microarray Experiment Accession ID GSE8858 <a href=""http://www.ncbi.nlm.nih.gov/geo/query/acc.cgi?acc=GSE8858""target=_blank>Display GEO Series Webpage</a>";Prestwick:1109;"Same as: <a href=""http://pubchem.ncbi.nlm.nih.g…
158	Antibacterial	DB01045	5458213	Rifampin	Ansamycins	Miscellaneous	RNA Polymerase	InChI=1S/C43H58N4O12/c1-21-12-11-13-22(2)42(55)45-33-28(20-44-47-17-15-46(9)16-18-47)37(52)30-31(38(33)53)36(51)26(6)40-32(30)41(54)43(8,59-40)57-19-14-29(56-10)23(3)39(58-27(7)48)25(5)35(50)24(4)34(21)49/h11-14,19-21,23-25,29,34-35,39,44,49-51,53H,15-18H2,1-10H3,(H,45,55)/b12-11+,19-14+,22-13-,28-20-/t21-,23+,24+,25+,29-,34-,35+,39+,43-/m0/s1	FZYOVNIOYYPUPY-UXKYPCFPSA-N		C43H58N4O12	12	6	5	3	4	5	2.00912	217.86	4	12	823.961	O1c2c3c4c(c(O)c2C)C(O)=C(NC(=O)C(=CC=CC(C)C(O)C(C)C(O)C(C)C(OC(=O)C)C(C)C(OC)C=COC1(C)C3=O)C)C(=CNN1CC[NH+](CC1)C)C4=O	Anti-Bacterial Agents;Nucleic Acid Synthesis Inhibitors;Pharmacologic Actions;Antitubercular Agents;Leprostatic Agents;Anti-Infective Agents;Therapeutic Uses;Antibiotics, Antitubercular;Chemical Actions and Uses;Enzyme Inhibitors;Molecular Mechanisms of Pharmacological Action	Rifampicin;Benemycin;rifampin;Dipicin;Rimycin;Rifamicin AMP;Rifadin I.V;AZT + Rifampin;Rifampin [USAN];Prestwick2_000525;Prestwick3_000525;Spectrum5_002018;Rifaldazin;Abrifam;BSPBio_000509;Rifaldin;Bio-0621;Ramp;MLS001148237;BPBio1_000561;MolPort-002-513-586;HMS2089F12;C43H58N4O12;LS-7689;NCGC00022678-03;NCGC00022678-04;NCGC00022678-05;NCGC00160500-01;CPD001906767;SAM002264646;SMR000653525;CID545…	MLSMR_SUPPLIER_STRUCTURE_ID: 83907;NIH:SAM002264646;"For further information visit the NTP Study <a href=""http://ntp-apps.niehs.nih.gov/ntp_tox/index.cfm?fuseaction=ntpsearch.ntpstudiesforchemical&cas_no=AZTRIFAMPIN""target=""_blank"">Chemical Results Webpage</a>";"Substance included in EPA DSSTox FDAMDD: FDA Maximum (Recommended) Daily Dose Database File <a href=""http://www.epa.gov/ncct/dsstox…
159	Antibacterial	DB01201	6323497	Rifapentine	Ansamycins	Miscellaneous	RNA Polymerase	InChI=1S/C47H64N4O12/c1-24-13-12-14-25(2)46(59)49-37-32(23-48-51-20-18-50(19-21-51)31-15-10-11-16-31)41(56)34-35(42(37)57)40(55)29(6)44-36(34)45(58)47(8,63-44)61-22-17-33(60-9)26(3)43(62-30(7)52)28(5)39(54)27(4)38(24)53/h12-14,17,22-24,26-28,31,33,38-39,43,48,53-55,57H,10-11,15-16,18-21H2,1-9H3,(H,49,59)/b13-12+,22-17+,25-14-,32-23+/t24-,26+,27+,28+,33-,38-,39+,43+,47-/m0/s1	RISDZDVHYCURHD-QLWTZYDESA-N		C47H64N4O12	12	6	6	3	5	6	3.32192	217.86	4	12	878.053	O1c2c3c4c(c(O)c2C)C(O)=C(NC(=O)C(=CC=CC(C)C(O)C(C)C(O)C(C)C(OC(=O)C)C(C)C(OC)C=COC1(C)C3=O)C)C(=CNN1CC[NH+](CC1)C1CCCC1)C4=O	Antitubercular Agents;Antibiotics, Antitubercular;Chemical Actions and Uses;Therapeutic Uses;Anti-Bacterial Agents;Anti-Infective Agents;Pharmacologic Actions;Leprostatic Agents	RIFAPENTINE;Priftin;Cyclopentyl rifampin;Rifamycin AF/ACPP;Rifapentin;Rifapentina;Rifapentinum;KTC 1;Priftin (TN);S1760_Selleck;CHEBI:45304;MDL 473;MDL-473;DL 473;Rifapentine (USAN/INN);CHEMBL1660;MDL473;Ambap127923-87-9;R 77-3;DL473;Cyclopentylrifampicin;DL-473;3-(((4-Cyclopentyl-1-piperazinyl)imino)methyl)rifamycin;DB01201;Antibiotic DL 473IT;Priftin, Cyclopentylrifampicin, Rifapentine;C08059;D…	Activity: Antibacterial [DS:H00342];ATC code: J04AB05;Groups: approved;Indication: For the treatment of pulmonary tuberculosis.;LOG P CALCULATED USING EXPERIMENTAL VALUE ADJUSTED (EVA) METHOD; EXPERIMENTAL LOG P VALUE OF 1.2 FOR RIFAMPIN (PH 7.4) USED;Mechanism of action: Rifapentine has shown higher bacteriostatic and bactericidal activities especially against intracellular bacteria growing in h…
160	Antibacterial	DB01220	6436173	Rifaximin	Ansamycins	Miscellaneous	RNA Polymerase	InChI=1S/C43H51N3O11/c1-19-14-16-46-28(18-19)44-32-29-30-37(50)25(7)40-31(29)41(52)43(9,57-40)55-17-15-27(54-10)22(4)39(56-26(8)47)24(6)36(49)23(5)35(48)20(2)12-11-13-21(3)42(53)45-33(34(32)46)38(30)51/h11-18,20,22-24,27,35-36,39,48-51H,1-10H3,(H,45,53)/b12-11+,17-15+,21-13-/t20-,22+,23+,24+,27-,35-,36+,39+,43-/m0/s1	NZCRJKRKKOLAOJ-XRCRFVBUSA-N		C43H51N3O11	11	5	3	3	5	6	6.28582	198.9	3	11	785.891	O1c2c3c4c(c(O)c2C)c(O)c(NC(=O)C(=CC=CC(C)C(O)C(C)C(O)C(C)C(OC(=O)C)C(C)C(OC)C=COC1(C)C3=O)C)c1n2c(nc14)C=C(C=C2)C	Chemical Actions and Uses;Gastrointestinal Agents;Pharmacologic Actions;Therapeutic Uses;Anti-Infective Agents	Rifaximin;Rifaxidin;Rifacol;Xifaxan;Normix;Fatroximin;Rifamixin;Ritacol;Rifamycin L 105;Rifamycin L 105SV;Rifaximine [French];Rifaximinum;Rifaximinum [Latin];Rifaximina;Rifaximine;Rifaximina [Spanish];Flonorm;Lumenax;Rifaxin;Spiraxin;Lormyx;RedActiv;Rifaximin [USAN:INN];Xifaxsan (TN);S1790_Selleck;L 105SV;L 105 (Ansamacrolide antibiotic);Rifaximin (USAN/INN);alpha-0817185;BRN 3584528;CHEMBL1617;B…	Activity: Antibacterial;Anti-Infective Agents;ATC code: A07AA11 D06AX11;Drug / Therapeutic Agent;Gastrointestinal Agents;Groups: approved, investigational;Indication: For the treatment of patients (>/=12 years of age) with travelers' diarrhea caused by noninvasive strains of Escherichia coli. Rifaximin is also designated an orphan drug by the Food and Drug Administration for the adjunctive treatm…
161	Antibacterial	DB01051	54675769	Novobiocin	Aminocoumarin	Miscellaneous	Topoisomerase	InChI=1S/C31H36N2O11/c1-14(2)7-8-16-13-17(9-11-19(16)34)27(37)33-21-22(35)18-10-12-20(15(3)24(18)42-28(21)38)41-29-23(36)25(43-30(32)39)26(40-6)31(4,5)44-29/h7,9-13,23,25-26,29,34-36H,8H2,1-6H3,(H2,32,39)(H,33,37)/t23-,25+,26-,29-/m1/s1	YJQPYGGHQPGBLI-KGSXXDOSSA-N	[(3R,4S,5R,6R)-5-hydroxy-6-[4-hydroxy-3-[[4-hydroxy-3-(3-methylbut-2-enyl)benzoyl]amino]-8-methyl-2-oxochromen-7-yl]oxy-3-methoxy-2,2-dimethyloxan-4-yl] carbamate	C31H36N2O11	7	4	10	2	2	4	3.01089	198.93	2	11	611.624	O1C(C)(C)C(OC)C(OC(=O)N)C(O)C1Oc1ccc2c(OC(=O)C(NC(=O)c3cc(CC=C(C)C)c(O)cc3)=C2[O-])c1C	novobiocin;Albamycin;Cathomycin;Inamycin;Spheromycin;Cardelmycin;Streptonivicin;Cathocin;Robiocina;Sirbiocina;Stilbiocina;Albamix;Antibiotic PA-93;Crystallinic acid;Novo-R;Novobiocina;Novobiocine;Novobiocinum;Novobiocine [INN-French];Novobiocinum [INN-Latin];Novobiocina [INN-Spanish];PA 93;HSDB 7443;Spectrum_001001;1aj6;Novobiocin [INN:BAN];AC1L1SUS;AC1Q6NLU;Spectrum2_000977;Spectrum3_000528;Spec…	MLSMR_SAMPLE_SUPPLIER: InterBioScreen;Enzyme inhibitors;"For further information visit GEO Series Microarray Experiment Accession ID GSE4378 <a href=""http://www.ncbi.nlm.nih.gov/geo/query/acc.cgi?acc=GSE4378target=_blank"">Display GEO Series Webpage</a>";PDB Accession Code 1S14;MLSMR_SUPPLIER_STRUCTURE_ID: STOCK1N-34236;Crystal Structure Of Escherichia Coli Topoisomerase Iv Pare 24kda Subunit Al…	Chemical Actions and Uses;Enzyme Inhibitors;Molecular Mechanisms of Pharmacological Action;Pharmacologic Actions;Therapeutic Uses;Anti-Bacterial Agents;Anti-Infective Agents;Nucleic Acid Synthesis Inhibitors
162	Antibacterial		54686001	Coumermycin A1	Aminocoumarin	Miscellaneous	Topoisomerase	InChI=1S/C55H59N5O20/c1-21-12-16-29(57-21)48(67)77-42-38(63)52(79-54(6,7)44(42)71-10)73-31-18-14-26-36(61)34(50(69)75-40(26)24(31)4)59-46(65)28-20-56-33(23(28)3)47(66)60-35-37(62)27-15-19-32(25(5)41(27)76-51(35)70)74-53-39(64)43(45(72-11)55(8,9)80-53)78-49(68)30-17-13-22(2)58-30/h12-20,38-39,42-45,52-53,56-58,61-64H,1-11H3,(H,59,65)(H,60,66)/t38-,39+,42+,43-,44-,45+,52?,53?/m0/s1	WTIJXIZOODAMJT-ALIUUSDYSA-N	[(3S,4R,5S)-5-hydroxy-6-[4-hydroxy-3-[[5-[[4-hydroxy-7-[(3R,4S,5R)-3-hydroxy-5-methoxy-6,6-dimethyl-4-(5-methyl-1H-pyrrole-2-carbonyl)oxyoxan-2-yl]oxy-8-methyl-2-oxochromen-3-yl]carbamoyl]-4-methyl-1H-pyrrole-3-carbonyl]amino]-8-methyl-2-oxochromen-7-yl]oxy-3-methoxy-2,2-dimethyloxan-4-yl] 5-methyl-1H-pyrrole-2-carboxylate	C55H59N5O20	12	7	18	3	5	9	4.3396	352.73	5	20	1108.08	O1C(C)(C)C(OC)C(OC(=O)c2[nH]c(cc2)C)C(O)C1Oc1ccc2c(OC(=O)C(NC(=O)c3c[nH]c(C(=O)NC=4C(Oc5c(ccc(OC6OC(C)(C)C(OC)C(OC(=O)c7[nH]c(cc7)C)C6O)c5C)C=4[O-])=O)c3C)=C2[O-])c1C	Coumermycins;Cumamycinum;Notomycin A1;Sugordomycin D-la;Sugordomycin D-1a;Coumamycin (VAN);Coumamycine [INN-French];Coumamycinum [INN-Latin];COUMERMYCIN;Cumamicina [INN-Spanish];Coumamycin;Notomycin;coumermycin a1;NSC 107412;BRN 0470805;Coumermycin [USAN];Pyrrole-2-carboxylic acid, 5-methyl-, diester with 3,3'-((3-methylpyrrole-2,4-diyl)bis(carbonylimino))bis(7-((5,5-di-C-methyl-4-O-methyl-alpha-…	[(3S,4R,5S)-3-methoxy-6-[3-[[5-[[7-[(3R,4S,5R)-5-methoxy-6,6-dimethyl-4-[(5-methyl-1H-pyrrol-2-yl)carbonyloxy]-3-oxidanyl-oxan-2-yl]oxy-8-methyl-2-oxidanyl-4-oxidanylidene-chromen-3-yl]carbamoyl]-4-methyl-1H-pyrrol-3-yl]carbonylamino]-8-methyl-2-oxidanyl-4-oxidanylidene-chromen-7-yl]oxy-2,2-dimethyl-5-oxidanyl-oxan-4-yl] 5-methyl-1H-pyrrole-2-carboxylate;Antibiotics, Antineoplastic;Antineoplastic…	Antibiotics, Antineoplastic;Antineoplastic Agents;Chemical Actions and Uses;Enzyme Inhibitors;Molecular Mechanisms of Pharmacological Action;Pharmacologic Actions;Therapeutic Uses
163	Antibacterial	DB04570	47499	Latamoxef	Oxacephem	Beta-lactam	Cell wall	InChI=1S/C20H20N6O9S/c1-25-19(22-23-24-25)36-8-10-7-35-18-20(34-2,17(33)26(18)13(10)16(31)32)21-14(28)12(15(29)30)9-3-5-11(27)6-4-9/h3-6,12,18,27H,7-8H2,1-2H3,(H,21,28)(H,29,30)(H,31,32)/t12?,18-,20+/m1/s1	JWCSIUVGFCSJCK-CAVRMKNVSA-N	(6R,7R)-7-[[2-carboxy-2-(4-hydroxyphenyl)acetyl]amino]-7-methoxy-3-[(1-methyltetrazol-5-yl)sulfanylmethyl]-8-oxo-5-oxa-1-azabicyclo[4.2.0]oct-2-ene-2-carboxylic acid	C20H20N6O9S	8	2	10	2	2	4	-3.4379	211.96	6	9	518.463	S(CC=1COC2N(C(=O)C2(OC)NC(=O)C(C(=O)[O-])c2ccc(O)cc2)C=1C(=O)[O-])c1nnnn1C	Pharmacologic Actions;Therapeutic Uses;Anti-Bacterial Agents;Anti-Infective Agents;Chemical Actions and Uses	moxalactam;Latamoxef;Lamoxactam;Latamoxefum;Oxa-cephem;LMOX;Festamoxin;Latamoxefum [INN-Latin];1-Oxacephalosporin;Disodium Moxalactam;Latamoxef (INN);64952-97-2;Spectrum_000971;Latamoxef [INN:BAN];Prestwick0_000819;Prestwick1_000819;Prestwick2_000819;Spectrum2_001067;Spectrum3_000510;Spectrum4_000064;Spectrum5_001371;EINECS 265-287-9;Lilly 127935;AC1L2I6O;AC1Q41EH;AC1Q6LO9;UNII-VUF6C936Z3;BSPBio_…	.Beta.-Lactams;Groups: approved;DISODIUM SALT;Activity: Antibiotic, cephalosporin;"Substance included in EPA DSSTox FDAMDD: FDA Maximum (Recommended) Daily Dose Database File <a href=""http://www.epa.gov/ncct/dsstox/sdf_fdamdd.html""target=""_blank"">[link to DSSTox SDF Download Page]</a>";"For further information visit the FDA Maximum Recommended Therapeutic Dose Database <a href=""http://www.fd…
164	Antibacterial		65864	Flomoxef	Oxacephem	Beta-lactam	Cell wall	InChI=1S/C15H18F2N6O7S2/c1-29-15(18-8(25)6-31-13(16)17)11(28)23-9(10(26)27)7(4-30-12(15)23)5-32-14-19-20-21-22(14)2-3-24/h12-13,24H,2-6H2,1H3,(H,18,25)(H,26,27)/t12-,15+/m1/s1	UHRBTBZOWWGKMK-DOMZBBRYSA-N	(6R,7R)-7-[[2-(difluoromethylsulfanyl)acetyl]amino]-3-[[1-(2-hydroxyethyl)tetrazol-5-yl]sulfanylmethyl]-7-methoxy-8-oxo-5-oxa-1-azabicyclo[4.2.0]oct-2-ene-2-carboxylic acid	C15H18F2N6O7S2	8	2	12	1	3	3	-2.3589	171.83	6	7	495.464	S(CC=1COC2N(C(=O)C2(OC)NC(=O)CSC(F)F)C=1C(=O)[O-])c1nnnn1CCO		Flomoxef;Flomoxefum;Flomoxefo;99665-00-6;FMOX;S 6315;flomoxef [5-Oxa-1-azabicyclo[4.2.0]oct-2-ene-2-carboxylic acid, 7-[[[(difluoromethyl)thio]acetyl]amino]-3-[[[1-(2-hydroxyethyl)-1H-tetrazol-5-yl]thio]methyl]-7-methoxy-8-oxo-, (6R-cis)- ];Flomoxef (INN);Flomoxefum [Latin];Flomoxefo [Spanish];UNII-V9E5U5XF42;CHEMBL15413;AC1L244K;SBB071020;NCGC00182999-01;AC-15832;D07963;A846063;I06-1927;(-)-(6R,…	Antibacterials;Target: D-alanyl-D-alanine carboxypeptidase inhibitor;Activity: Antibiotic; Cephalosporin; Cephalosporinase-resistant;(6R,7R)-7-[2-[bis(fluoranyl)methylsulfanyl]ethanoylamino]-3-[[1-(2-hydroxyethyl)-1,2,3,4-tetrazol-5-yl]sulfanylmethyl]-7-methoxy-8-oxidanylidene-5-oxa-1-azabicyclo[4.2.0]oct-2-ene-2-carboxylic acid;ATC code: J01DC14
165	Antibacterial	DB00601	441401	Linezolid	Oxazolidinone	Oxazolidinone	50S Ribosome	InChI=1S/C16H20FN3O4/c1-11(21)18-9-13-10-20(16(22)24-13)12-2-3-15(14(17)8-12)19-4-6-23-7-5-19/h2-3,8,13H,4-7,9-10H2,1H3,(H,18,21)/t13-/m0/s1	TYZROVQLWOKYKF-ZDUSSCGKSA-N	N-[[(5S)-3-(3-fluoro-4-morpholin-4-ylphenyl)-2-oxo-1,3-oxazolidin-5-yl]methyl]acetamide	C16H20FN3O4	3	1	5	0	0	3	1.1236	71.11	3	4	337.351	Fc1cc(N2CC(OC2=O)CNC(=O)C)ccc1N1CCOCC1	Protein Synthesis Inhibitors;Anti-Infective Agents;Chemical Actions and Uses;Enzyme Inhibitors;Molecular Mechanisms of Pharmacological Action;Therapeutic Uses;Pharmacologic Actions	linezolid;Zyvox;Zyvoxid;165800-03-3;Linezlid;Zyvoxam;Zyvoxa;PNU-100766;U-100766;Zyvox (TN);S1408_Selleck;Linezolid [USAN:INN];Linezolid & VRC3375;CHEMBL126;PNU 100766;AC1L9B3M;U 100766;Linezolid (JAN/USAN/INN);BIDD:GT0404;MLS000759444;MLS001424075;C16H20FN3O4;HSDB 7478;CHEBI:126280;HMS2051F08;HMS2089K06;ZINC02008866;DB00601;DB08769;111GE017;AC-16128;CPD000466335;NDA 21-130 Zyvox (linezolid tablet…	MLSMR_SAMPLE_SUPPLIER: Sequoia Research Products Ltd.;Groups: approved, investigational;Linezolid is a synthetic antibiotic used for the treatment of serious infections.;"<a target=_blank href=""mailto:info@seqchem.com?SUBJECT=price and availability of 165800-03-3"">Sequoia Research Products 165800-03-3</A>";"<a target=_blank href=""noteTL8001272"">Trylead Chemical TL8001272</A>";Linezolid or Lin…
166	Antibacterial		73214	Eperezolid	Oxazolidinone	Oxazolidinone	50S Ribosome	InChI=1S/C18H23FN4O5/c1-12(25)20-9-14-10-23(18(27)28-14)13-2-3-16(15(19)8-13)21-4-6-22(7-5-21)17(26)11-24/h2-3,8,14,24H,4-7,9-11H2,1H3,(H,20,25)/t14-/m0/s1	SIMWTRCFFSTNMG-AWEZNQCLSA-N	N-[[(5S)-3-[3-fluoro-4-[4-(2-hydroxyacetyl)piperazin-1-yl]phenyl]-2-oxo-1,3-oxazolidin-5-yl]methyl]acetamide	C18H23FN4O5	4	2	7	0	1	3	-0.0721	102.42	4	5	394.403	Fc1cc(N2CC(OC2=O)CNC(=O)C)ccc1N1CCN(CC1)C(=O)CO	Therapeutic Uses;Anti-Infective Agents;Pharmacologic Actions;Chemical Actions and Uses	Eperezolid;Eperezolid [USAN];PNU 100592;U-100592;165800-04-4;Acetamide, N-((3-(3-fluoro-4-(4-(hydroxyacetyl)-1-piperazynyl)phenyl)- 2-oxo-5-oxazolidinyl)methyl)-, (S)-;U 100592;acetamide, n-[[(5s)-3-[3-fluoro-4-[4-(2-hydroxyacetyl)-1-piperazinyl]phenyl]-2-oxo-5-oxazolidinyl]methyl]-;AC1L2JGQ;AC1Q5LET;Eperezolid (USAN/INN);UNII-C460ZSU1OW;C18H23FN4O5;AR-1H6265;LS-9620;AB1006800;D04017;Acetamide, N…	Activity: Antibacterial;Anti-Infective Agents;Antibacterial;Drug / Therapeutic Agent;InChIKey: SIMWTRCFFSTNMG-AWEZNQCLSA-N;N-[[(5S)-3-[3-fluoranyl-4-[4-(2-oxidanylethanoyl)piperazin-1-yl]phenyl]-2-oxidanylidene-1,3-oxazolidin-5-yl]methyl]ethanamide;NIAID ChemDB HIV, Opportunistic Infections and Tuberculosis Therapeutics Database;Oxazolidines;Whole Molecule
167	Antibacterial		213049	Posizolid	Oxazolidinone	Oxazolidinone	50S Ribosome	InChI=1S/C21H21F2N3O7/c22-15-7-13(26-9-14(33-21(26)30)11-31-18-3-6-32-24-18)8-16(23)19(15)12-1-4-25(5-2-12)20(29)17(28)10-27/h1,3,6-8,14,17,27-28H,2,4-5,9-11H2/t14-,17+/m1/s1	HBUJYEUPIIJJOS-PBHICJAKSA-N	(5R)-3-[4-[1-[(2S)-2,3-dihydroxypropanoyl]-3,6-dihydro-2H-pyridin-4-yl]-3,5-difluorophenyl]-5-(1,2-oxazol-3-yloxymethyl)-1,3-oxazolidin-2-one	C21H21F2N3O7	5	2	8	0	2	4	1.3259	125.57	3	7	465.409	Fc1cc(N2CC(OC2=O)COc2nocc2)cc(F)c1C=1CCN(CC=1)C(=O)C(O)CO		Posizolid;AZD2563;Posizolid [INN];AC1L4U5J;AC1Q6O1X;CHEMBL131854;AR-1H7626;A820111;(5R)-3-(4-(1-((2S)-2,3-Dihydroxypropanoyl)-1,2,3,6-tetrahydro-4-pyridyl)-3,5-difluorophenyl)-5-(1,2-oxazol-3-yloxymethyl)-1,3-oxazolidin-2-one;(5R)-3-[4-[1-[(2S)-2,3-bis(oxidanyl)propanoyl]-3,6-dihydro-2H-pyridin-4-yl]-3,5-bis(fluoranyl)phenyl]-5-(1,2-oxazol-3-yloxymethyl)-1,3-oxazolidin-2-one;(5R)-3-[4-[1-[(2S)-2,…	(5R)-3-[4-[1-[(2S)-2,3-bis(oxidanyl)propanoyl]-3,6-dihydro-2H-pyridin-4-yl]-3,5-bis(fluoranyl)phenyl]-5-(1,2-oxazol-3-yloxymethyl)-1,3-oxazolidin-2-one
168	Antibacterial		11224409	Radezolid	Oxazolidinone	Oxazolidinone	50S Ribosome	InChI=1S/C22H23FN6O3/c1-14(30)25-12-19-13-29(22(31)32-19)18-6-7-20(21(23)8-18)16-4-2-15(3-5-16)9-24-10-17-11-26-28-27-17/h2-8,11,19,24H,9-10,12-13H2,1H3,(H,25,30)(H,26,27,28)/t19-/m0/s1	BTTNOGHPGJANSW-IBGZPJMESA-N	N-[[(5S)-3-[3-fluoro-4-[4-[(2H-triazol-4-ylmethylamino)methyl]phenyl]phenyl]-2-oxo-1,3-oxazolidin-5-yl]methyl]acetamide	C22H23FN6O3	4	2	9	0	1	4	1.8685	116.82	6	3	439.471	Fc1cc(N2CC(OC2=O)CNC(=O)C)ccc1-c1ccc(cc1)C[NH2+]Cc1n[nH]nc1		Radezolid;RX-1741;869884-78-6;Radezolid (USAN/INN);UNII-53PC6LO35W;CHEMBL455461;RX-103;Rx-01-667;D09369	Activity: Antibacterial
169	Antibacterial		11234049	Torezolid	Oxazolidinone	Oxazolidinone	50S Ribosome	InChI=1S/C17H15FN6O3/c1-23-21-16(20-22-23)15-5-2-10(7-19-15)13-4-3-11(6-14(13)18)24-8-12(9-25)27-17(24)26/h2-7,12,25H,8-9H2,1H3/t12-/m1/s1	XFALPSLJIHVRKE-GFCCVEGCSA-N	(5R)-3-[3-fluoro-4-[6-(2-methyltetrazol-5-yl)pyridin-3-yl]phenyl]-5-(hydroxymethyl)-1,3-oxazolidin-2-one	C17H15FN6O3	6	1	4	0	1	4	1.7549	106.26	6	3	370.344	Fc1cc(N2CC(OC2=O)CO)ccc1-c1ccc(nc1)-c1nn(nn1)C		Torezolid;856866-72-3;Tedizolid (USAN/INN);UNII-97HLQ82NGL;CHEMBL1257051;DA-7157;D09685	Activity: Antibiotic;NIAID ChemDB HIV, Opportunistic Infections and Tuberculosis Therapeutics Database;Oxazolidines
170	Antibacterial		65894	Faropenem	Penem	Beta-lactam	Cell wall	InChI=1S/C12H15NO5S/c1-5(14)7-10(15)13-8(12(16)17)9(19-11(7)13)6-3-2-4-18-6/h5-7,11,14H,2-4H2,1H3,(H,16,17)/t5-,6-,7+,11-/m1/s1	HGGAKXAHAYOLDJ-FHZUQPTBSA-N	(5R,6S)-6-[(1R)-1-hydroxyethyl]-7-oxo-3-[(2R)-oxolan-2-yl]-4-thia-1-azabicyclo[3.2.0]hept-2-ene-2-carboxylic acid	C12H15NO5S	3	1	3	0	0	3	-0.961	89.9	1	5	284.312	S1C2N(C(=O)C2C(O)C)C(C(=O)[O-])=C1C1OCCC1		faropenem;Fropenem;CHEBI:51257;106560-14-9;faropenem sodium hemipentahydrate;(+)-(5R,6S)-6-((1R)-1-Hydroxyethyl)-7-oxo-3-((2R)-tetrahydro-2-furyl)-4-thia-1-azabicyclo(3.2.0)hept-2-ene-2-carboxylic acid;HGGAKXAHAYOLDJ-FHZUQPTBSA-N;(5R,6S)-6-[(1R)-1-hydroxyethyl]-7-oxo-3-[(2R)-tetrahydrofuran-2-yl]-4-thia-1-azabicyclo[3.2.0]hept-2-ene-2-carboxylic acid;NCGC00164546-02;122547-49-3;A801462;AABBE9DB31…	PDB Accession Code 3BFF;Hydrolase;106560-14-9;Whole Molecule;Class A Beta-Lactamase Sed-G238c Complexed With Faropenem;(5R,6S)-6-[(1R)-1-oxidanylethyl]-7-oxidanylidene-3-[(2R)-oxolan-2-yl]-4-thia-1-azabicyclo[3.2.0]hept-2-ene-2-carboxylic acid;Class A Beta-Lactamase Sed-G238c Complexed With Faropenem Hydrolase, Beta-Lactamase, Class A Sed-G238c, Faropenem, Acyl-Enzyme Mol_id: 1; Molecule: Class A…
171	Antibacterial	DB00301	21319	Flucloxacillin	Penicillin	Beta-lactam	Cell wall	InChI=1S/C19H17ClFN3O5S/c1-7-10(12(23-29-7)11-8(20)5-4-6-9(11)21)15(25)22-13-16(26)24-14(18(27)28)19(2,3)30-17(13)24/h4-6,13-14,17H,1-3H3,(H,22,25)(H,27,28)/t13-,14+,17-/m1/s1	UIOFUWFRIANQPC-JKIFEVAISA-N	(2S,5R,6R)-6-[[3-(2-chloro-6-fluorophenyl)-5-methyl-1,2-oxazole-4-carbonyl]amino]-3,3-dimethyl-7-oxo-4-thia-1-azabicyclo[3.2.0]heptane-2-carboxylic acid	C19H17ClFN3O5S	3	1	5	0	1	4	1.35312	115.57	3	5	452.87	Clc1cccc(F)c1-c1noc(C)c1C(=O)NC1C2SC(C)(C)C(N2C1=O)C(=O)[O-]	Anti-Bacterial Agents;Anti-Infective Agents;Pharmacologic Actions;Therapeutic Uses;Chemical Actions and Uses	Flucloxacillin;FLOXACILLIN;Floxapen;flucloxacilina;Flucloxacilline;Flucloxacillinum;Fluorochloroxacillin;Flucloxacilina [INN-Spanish];Flucloxacilline [INN-French];Flucloxacillinum [INN-Latin];CHEBI:5098;Fluclox;BRL 2039;Floxapen (TN);Flucloxacillin-Sodium;MFIPC;Floxacillin (USAN);Floxacillin [USAN];Flucloxacillin (INN);AC1Q5QXQ;EINECS 226-051-0;flucloxacillin sodium;AC1L2I2K;C19H17ClFN3O5S;UNII-4…	Anti-Bacterial Agents;Target: D-alanyl-D-alanine carboxypeptidase inhibitor;"<a href=""http://ctd.mdibl.org/detail.go?view=gene&type=chem&acc=D005436"">Genes and Proteins</a>";Structure Shown: tested chemical;(2S,5R,6R)-6-[[3-(2-chloranyl-6-fluoranyl-phenyl)-5-methyl-1,2-oxazol-4-yl]carbonylamino]-3,3-dimethyl-7-oxidanylidene-4-thia-1-azabicyclo[3.2.0]heptane-2-carboxylic acid;Activity: Antibacte…
172	Antibacterial	DB00319	43672	Piperacillin	Penicillin	Beta-lactam	Cell wall	InChI=1S/C23H27N5O7S/c1-4-26-10-11-27(19(32)18(26)31)22(35)25-13(12-8-6-5-7-9-12)16(29)24-14-17(30)28-15(21(33)34)23(2,3)36-20(14)28/h5-9,13-15,20H,4,10-11H2,1-3H3,(H,24,29)(H,25,35)(H,33,34)/t13-,14-,15+,20-/m1/s1	IVBHGBMCVLDMKU-GXNBUGAJSA-N	(2S,5R,6R)-6-[[(2R)-2-[(4-ethyl-2,3-dioxopiperazine-1-carbonyl)amino]-2-phenylacetyl]amino]-3,3-dimethyl-7-oxo-4-thia-1-azabicyclo[3.2.0]heptane-2-carboxylic acid	C23H27N5O7S	5	2	9	2	2	4	-1.4795	159.26	5	7	516.555	S1C2N(C(C(=O)[O-])C1(C)C)C(=O)C2NC(=O)C(NC(=O)N1CCN(CC)C(=O)C1=O)c1ccccc1	Pharmacologic Actions;Therapeutic Uses;Chemical Actions and Uses;Anti-Bacterial Agents;Anti-Infective Agents	piperacillin;Pipracil;Piperacillin anhydrous;Peperacillin;Pipercillin;CHEBI:8232;Pipril;Pipracil, Piper;61477-96-1;Peracin (TN);PIPC;Piperacillin (INN);CCRIS 7362;PIPERACILLIN SODIUM;Piperacillin (anhydrous);AC1L2ACR;AC1Q5QXJ;Prestwick0_000755;Prestwick1_000755;Prestwick2_000755;Prestwick3_000755;EINECS 262-811-8;CHEMBL702;Piperacillin Monosodium Salt;BSPBio_000770;BIDD:GT0167;SPBio_002709;BPBio1…	Publication Date: 2011-01-12;"<a href=""http://worldwide.espacenet.com/publicationDetails/biblio?FT=D&CC=EP&NR=2295402A2&KC=A2"">Antibacterial agents</a>";"For further information visit the FDA Maximum Recommended Therapeutic Dose Database <a href=""http://www.fda.gov/AboutFDA/CentersOffices/CDER/ucm092199.htm""target=""_blank"">Website</a>";Applicant(s): UNIV WASHINGTON [US], NOVARTIS VACCINES &…
173	Antibacterial	DB00415	6249	Ampicillin	Penicillin	Beta-lactam	Cell wall	InChI=1S/C16H19N3O4S/c1-16(2)11(15(22)23)19-13(21)10(14(19)24-16)18-12(20)9(17)8-6-4-3-5-7-8/h3-7,9-11,14H,17H2,1-2H3,(H,18,20)(H,22,23)/t9-,10-,11+,14-/m1/s1	AVKUERGKIZMTKX-NJBDSQKTSA-N	(2S,5R,6R)-6-[[(2R)-2-amino-2-phenylacetyl]amino]-3,3-dimethyl-7-oxo-4-thia-1-azabicyclo[3.2.0]heptane-2-carboxylic acid	C16H19N3O4S	2	1	5	0	0	3	-1.6379	117.18	3	4	349.411	S1C2N(C(C(=O)[O-])C1(C)C)C(=O)C2NC(=O)C([NH3+])c1ccccc1	Pharmacologic Actions;Chemical Actions and Uses;Therapeutic Uses;Anti-Bacterial Agents;Anti-Infective Agents	ampicillin;Ampicillin acid;Principen;Aminobenzylpenicillin;Ampicilline;Polycillin;Tokiocillin;Totacillin;Ampicin;Omnipen;Penbritin;Synpenin;Amcill;Novo-ampicillin;Ampicillin A;D-Ampicillin;Ampicillin anhydrate;Ampicillinum;Bonapicillin;Racenacillin;Totalciclina;Adobacillin;Amblosin;Ampichel;Ampicilina;Ampifarm;Ampipenin;Ampiscel;Amplacilina;Amplipenyl;Amplisom;Amplital;Austrapen;Britacil;Campicil…	X-Ray Crystal Structure Of Acrb In Complex With A Novel Transmembrane Helix.;(2S,5R,6R)-6-[[(2R)-2-azanyl-2-phenyl-ethanoyl]amino]-3,3-dimethyl-7-oxidanylidene-4-thia-1-azabicyclo[3.2.0]heptane-2-carboxylic acid;Three-Dimensional Structure Of Anti-Ampicillin Single Chain Fv Fragment Complexed With The Hapten.;genotoxic agent;OR SODIUM SALT;Staphylococcus Epidermidis In Complex With Ampicillin Mul…
174	Antibacterial	DB00417	6869	Penicillin V	Penicillin	Beta-lactam	Cell wall	InChI=1S/C16H18N2O5S/c1-16(2)12(15(21)22)18-13(20)11(14(18)24-16)17-10(19)8-23-9-6-4-3-5-7-9/h3-7,11-12,14H,8H2,1-2H3,(H,17,19)(H,21,22)/t11-,12+,14-/m1/s1	BPLBGHOLXOTWMN-MBNYWOFBSA-N	(2S,5R,6R)-3,3-dimethyl-7-oxo-6-[(2-phenoxyacetyl)amino]-4-thia-1-azabicyclo[3.2.0]heptane-2-carboxylic acid	C16H18N2O5S	3	1	6	0	0	3	-0.6376	98.77	2	5	349.387	S1C2N(C(C(=O)[O-])C1(C)C)C(=O)C2NC(=O)COc1ccccc1	Chemical Actions and Uses;Therapeutic Uses;Anti-Infective Agents;Anti-Bacterial Agents;Pharmacologic Actions	penicillin v;Phenomycilline;Phenopenicillin;Beromycin;Fenospen;Oracillin;Penicillin phenoxymethyl;Phenoxymethylpenicillin;V-Cillin;Calcipen;Fenacilin;Fenoxypen;Meropenin;Phenocillin;Stabicillin;Vebecillin;Apopen;Oratren;Rocilin;Ospen;Compocillin V;Distaquaine V;Eskacillian V;Eskacillin V;Crystapen V;V-Tablopen;Pen-vee;Acipen V;Pen-Oral;V-Cylina;V-Cyline;Phenoxymethyl penicillin;Phenoximethylpenic…	Indication: For the treatment of mild to moderately severe infections (e.g. dental infection, infections in the heart, middle ear infections, rheumatic fever, scarlet fever, skin infections, upper and lower respiratory tract infections) due to microorganisms;"For further information visit the NTP Study <a href=""http://ntp-apps.niehs.nih.gov/ntp_tox/index.cfm?fuseaction=ntpsearch.ntpstudiesforche…
175	Antibacterial	DB00485	18381	Dicloxacillin	Penicillin	Beta-lactam	Cell wall	InChI=1S/C19H17Cl2N3O5S/c1-7-10(12(23-29-7)11-8(20)5-4-6-9(11)21)15(25)22-13-16(26)24-14(18(27)28)19(2,3)30-17(13)24/h4-6,13-14,17H,1-3H3,(H,22,25)(H,27,28)/t13-,14+,17-/m1/s1	YFAGHNZHGGCZAX-JKIFEVAISA-N	(2S,5R,6R)-6-[[3-(2,6-dichlorophenyl)-5-methyl-1,2-oxazole-4-carbonyl]amino]-3,3-dimethyl-7-oxo-4-thia-1-azabicyclo[3.2.0]heptane-2-carboxylic acid	C19H17Cl2N3O5S	3	1	5	0	1	4	1.86742	115.57	3	5	469.325	Clc1cccc(Cl)c1-c1noc(C)c1C(=O)NC1C2SC(C)(C)C(N2C1=O)C(=O)[O-]	Therapeutic Uses;Anti-Bacterial Agents;Anti-Infective Agents;Chemical Actions and Uses;Pharmacologic Actions	dicloxacillin;Dicloxacycline;Dicloxacilin;Dicloxacilina;Dicloxacilline;Dicloxacillinum;Maclicine;Dynapen;Diclossacillina;Pathocil;Dycill;Diclossacillina [DCIT];Dicloxacilina [INN-Spanish];Dicloxacilline [INN-French];Dicloxacillinum [INN-Latin];Dicloxaciclin;CHEBI:4511;Dichloroxacillin;BRL 1702;Methyldichlorophenylisoxazolylpenicillin;R-13423;HSDB 3222;Spectrum_000932;AC1L2BXC;AC1Q5QXP;Dicloxacill…	Same as: <a href="http://pubchem.ncbi.nlm.nih.gov/summary/summary.cgi?sid=9165">C06950</a>;BIOA;"For further information visit the FDA Maximum Recommended Therapeutic Dose Database <a href=""http://www.fda.gov/AboutFDA/CentersOffices/CDER/ucm092199.htm""target=""_blank"">Website</a>";Anti-Infective Agents;"Same as: <a href=""http://pubchem.ncbi.nlm.nih.gov/summary/summary.cgi?sid=7849407"">D02348…
176	Antibacterial	DB00578	20824	Carbenicillin	Penicillin	Beta-lactam	Cell wall	InChI=1S/C17H18N2O6S/c1-17(2)11(16(24)25)19-13(21)10(14(19)26-17)18-12(20)9(15(22)23)8-6-4-3-5-7-8/h3-7,9-11,14H,1-2H3,(H,18,20)(H,22,23)(H,24,25)/t9?,10-,11+,14-/m1/s1	FPPNZSSZRUTDAP-UWFZAAFLSA-N	(2S,5R,6R)-6-[(2-carboxy-2-phenylacetyl)amino]-3,3-dimethyl-7-oxo-4-thia-1-azabicyclo[3.2.0]heptane-2-carboxylic acid	C17H18N2O6S	2	1	6	0	0	3	-2.1829	129.67	2	6	376.389	S1C2N(C(C(=O)[O-])C1(C)C)C(=O)C2NC(=O)C(C(=O)[O-])c1ccccc1	Anti-Bacterial Agents;Pharmacologic Actions;Anti-Infective Agents;Chemical Actions and Uses;Therapeutic Uses	carbenicillin;Carboxybenzylpenicillin;Carbenicilina;Carbenicilline;Carbenicillinum;Pyopen;alpha-Carboxybenzylpencillin;Carboxybenzylpenicillin acid;Carbenicillina [DCIT];Geopen;CBPC;Carbenicilina [INN-Spanish];Carbenicilline [INN-French];Carbenicillinum [INN-Latin];alpha-Phenyl(carboxymethylpenicillin);Carbenicillina;CHEBI:3393;Carbenicillin (INN);HSDB 3020;Carboxybenzyl Penicillin;Spectrum_00009…	Mechanism of action: Free carbenicillin is the predominant pharmacologically active fraction of the salt. Carbenicillin exerts its antibacterial activity by interference with final cell wall synthesis of susceptible bacteria. Penicillins acylate the penicillin-sensitive transpeptidase C-terminal domain by opening the lactam ring. This inactivation of the enzyme prevents the formation of a cross-l…
177	Antibacterial	DB00607	8982	Nafcillin	Penicillin	Beta-lactam	Cell wall	InChI=1S/C21H22N2O5S/c1-4-28-13-10-9-11-7-5-6-8-12(11)14(13)17(24)22-15-18(25)23-16(20(26)27)21(2,3)29-19(15)23/h5-10,15-16,19H,4H2,1-3H3,(H,22,24)(H,26,27)/t15-,16+,19-/m1/s1	GPXLMGHLHQJAGZ-JTDSTZFVSA-N	(2S,5R,6R)-6-[(2-ethoxynaphthalene-1-carbonyl)amino]-3,3-dimethyl-7-oxo-4-thia-1-azabicyclo[3.2.0]heptane-2-carboxylic acid	C21H22N2O5S	3	1	6	0	0	4	1.1491	98.77	2	5	413.474	S1C2N(C(C(=O)[O-])C1(C)C)C(=O)C2NC(=O)c1c2c(ccc1OCC)cccc2	Chemical Actions and Uses;Therapeutic Uses;Anti-Bacterial Agents;Anti-Infective Agents;Pharmacologic Actions	nafcillin;Naphcillin;Nafcilina;Nafcilline;Nafcillinum;Nafcilin-1;Unipen;Nafcilina [INN-Spanish];Nafcilline [INN-French];Nafcillinum [INN-Latin];(2-Ethoxy-1-naphthyl)penicillin;Nallpen;Nafcillin & VRC3375;Nafcillin (INN);Naphthamidopenicillin;CHEBI:7447;HSDB 3133;Nafcillin [INN:BAN];Prestwick0_000843;Prestwick1_000843;Prestwick2_000843;Prestwick3_000843;(2-ethoxy-1-naphthalenyl)penicillin;EINECS 2…	Anti-Infective Agents;Structure Shown: tested chemical;"Substance included in EPA DSSTox FDAMDD: FDA Maximum (Recommended) Daily Dose Database File <a href=""http://www.epa.gov/ncct/dsstox/sdf_fdamdd.html""target=""_blank"">[link to DSSTox SDF Download Page]</a>";CYP induction: CYP1A2;Indication: For the treatment of infections caused by penicillinase-producing staphylococci which have demonstrat…
178	Antibacterial	DB00713	6196	Oxacillin	Penicillin	Beta-lactam	Cell wall	InChI=1S/C19H19N3O5S/c1-9-11(12(21-27-9)10-7-5-4-6-8-10)15(23)20-13-16(24)22-14(18(25)26)19(2,3)28-17(13)22/h4-8,13-14,17H,1-3H3,(H,20,23)(H,25,26)/t13-,14+,17-/m1/s1	UWYHMGVUTGAWSP-JKIFEVAISA-N	(2S,5R,6R)-3,3-dimethyl-6-[(5-methyl-3-phenyl-1,2-oxazole-4-carbonyl)amino]-7-oxo-4-thia-1-azabicyclo[3.2.0]heptane-2-carboxylic acid	C19H19N3O5S	3	1	5	0	0	4	0.56062	115.57	3	5	400.435	S1C2N(C(C(=O)[O-])C1(C)C)C(=O)C2NC(=O)c1c(noc1C)-c1ccccc1	Anti-Bacterial Agents;Pharmacologic Actions;Chemical Actions and Uses;Anti-Infective Agents;Therapeutic Uses	oxacillin;Oxazocillin;MPI-penicillin;Ossacillina;Oxacillinum;Prostaphlyn;Oxacilina;Oxacilline;Prostaphlin;Ossacillina [DCIT];MPi-PC;Oxazocilline;CHEBI:7809;Oxacilina [INN-Spanish];Oxacilline [INN-French];Oxacillinum [INN-Latin];Oxacilina (TN);Oxacillin (INN);Bactocill;Sodium oxacillin;5-Methyl-3-phenyl-4-isoxazolyl-penicillin;Oxacillin [INN:BAN];EINECS 200-635-5;66-79-5;Penicillin, (5-methyl-3-ph…	Same as: <a href="http://pubchem.ncbi.nlm.nih.gov/summary/summary.cgi?sid=96024994">D08307</a>;Natural Products, Unspecified Origin;"For further information visit the FDA Maximum Recommended Therapeutic Dose Database <a href=""http://www.fda.gov/AboutFDA/CentersOffices/CDER/ucm092199.htm""target=""_blank"">Website</a>";Indication: Used in the treatment of resistant staphylococci infections.;Isoxa…
179	Antibacterial	DB00739	193260	Hetacillin	Penicillin	Beta-lactam	Cell wall	InChI=1S/C19H23N3O4S/c1-18(2)13(17(25)26)21-15(24)12(16(21)27-18)22-14(23)11(20-19(22,3)4)10-8-6-5-7-9-10/h5-9,11-13,16,20H,1-4H3,(H,25,26)/t11?,12-,13+,16-/m1/s1	DXVUYOAEDJXBPY-XQERAMJGSA-N	(2S,5R,6R)-6-(2,2-dimethyl-5-oxo-4-phenylimidazolidin-1-yl)-3,3-dimethyl-7-oxo-4-thia-1-azabicyclo[3.2.0]heptane-2-carboxylic acid	C19H23N3O4S	2	0	3	0	0	4	-0.8543	97.36	3	4	389.476	S1C2N(C(C(=O)[O-])C1(C)C)C(=O)C2N1C(=O)C([NH2+]C1(C)C)c1ccccc1		(2S,5R,6R)-6-(2,2-dimethyl-5-oxo-4-phenylimidazolidin-1-yl)-3,3-dimethyl-7-oxo-4-thia-1-azabicyclo[3.2.0]heptane-2-carboxylic acid;AC1L4VWW;Hetacillin [USAN:INN:BAN];C19H23N3O4S;LS-174509;3511-16-8;6-(2,2-Dimethyl-5-oxo-4-phenyl-1-imidazolidinyl)-3,3-dimethyl-7-oxo-4-thia-1-azabicyclo(3.2.0)heptane-2-carboxylic acid	Structure Shown: tested chemical;(2S,5R,6R)-6-(2,2-dimethyl-5-oxidanylidene-4-phenyl-imidazolidin-1-yl)-3,3-dimethyl-7-oxidanylidene-4-thia-1-azabicyclo[3.2.0]heptane-2-carboxylic acid;Whole Molecule;InChIKey: DXVUYOAEDJXBPY-XQERAMJGSA-N;"Substance included in EPA DSSTox FDAMDD: FDA Maximum (Recommended) Daily Dose Database File <a href=""http://www.epa.gov/ncct/dsstox/sdf_fdamdd.html""target=""_…
180	Antibacterial	DB00766	5280980	Clavulanate	Penicillin	Beta-lactam	Cell wall	InChI=1S/C8H9NO5/c10-2-1-4-7(8(12)13)9-5(11)3-6(9)14-4/h1,6-7,10H,2-3H2,(H,12,13)/b4-1-/t6-,7-/m1/s1	HZZVJAQRINQKSD-PBFISZAISA-N	(2R,3Z,5R)-3-(2-hydroxyethylidene)-7-oxo-4-oxa-1-azabicyclo[3.2.0]heptane-2-carboxylic acid	C8H9NO5	3	1	2	0	0	2	-2.4303	89.9	1	5	198.154	O1C2N(C(C(=O)[O-])C1=CCO)C(=O)C2	Anti-Bacterial Agents;Anti-Infective Agents;Chemical Actions and Uses;Enzyme Inhibitors;Molecular Mechanisms of Pharmacological Action;Therapeutic Uses;Pharmacologic Actions	Clavulanate;CLAVULANIC ACID;Antibiotic MM 14151;Acido clavulanico;Acide clavulanique;acidum clavulanicum;Clavulansaeure [INN];Clavulansaeure;CHEBI:48947;Clavulinic Acid;MM 14151;Sodium Clavulanate;Clavulox (TN);AC1NQXUM;Acide clavulanique [INN-French];Acido clavulanico [INN-Spanish];Acidum clavulanicum [INN-Latin];Clavulanic acid (INN);EINECS 261-069-2;BRL-14151;58001-44-8;CHEMBL777;BRN 0787059;C…	Applicant(s): BASILEA PHARMACEUTICA AG [CH];PDB Accession Code 2XF3;"For further information visit the FDA Maximum Recommended Therapeutic Dose Database <a href=""http://www.fda.gov/AboutFDA/CentersOffices/CDER/ucm092199.htm""target=""_blank"">Website</a>";Natural Product;Structural And Mechanistic Studies On A Cephalosporin Esterase From The Clavulanic Acid Biosynthesis Pathway Hydrolase Mol_id:…
181	Antibacterial	DB00948	656511	Mezlocillin	Penicillin	Beta-lactam	Cell wall	InChI=1S/C21H25N5O8S2/c1-21(2)14(18(29)30)26-16(28)13(17(26)35-21)22-15(27)12(11-7-5-4-6-8-11)23-19(31)24-9-10-25(20(24)32)36(3,33)34/h4-8,12-14,17H,9-10H2,1-3H3,(H,22,27)(H,23,31)(H,29,30)/t12-,13-,14+,17-/m1/s1	YPBATNHYBCGSSN-VWPFQQQWSA-N	(2S,5R,6R)-3,3-dimethyl-6-[[(2R)-2-[(3-methylsulfonyl-2-oxoimidazolidine-1-carbonyl)amino]-2-phenylacetyl]amino]-7-oxo-4-thia-1-azabicyclo[3.2.0]heptane-2-carboxylic acid	C21H25N5O8S2	6	2	9	2	2	4	-1.473	176.33	5	8	538.582	S1C2N(C(C(=O)[O-])C1(C)C)C(=O)C2NC(=O)C(NC(=O)N1CCN(S(=O)(=O)C)C1=O)c1ccccc1	Chemical Actions and Uses;Anti-Bacterial Agents;Anti-Infective Agents;Therapeutic Uses;Pharmacologic Actions	MEZLOCILLIN;Mezlin;Mezlocilina;Mezlocillinum;CHEBI:6919;Mezlocillin (USAN/INN);AC1LCV44;CHEMBL1731;Mezlocilline;Multocillin;51481-65-3;DB00948;NCGC00167470-01;C07221;D05021;(2S,5R,6R)-3,3-dimethyl-6-{[(2R)-2-({[3-(methylsulfonyl)-2-oxoimidazolidin-1-yl]carbonyl}amino)-2-phenylacetyl]amino}-7-oxo-4-thia-1-azabicyclo[3.2.0]heptane-2-carboxylic acid;(2S,5R,6R)-3,3-dimethyl-6-[[(2R)-2-[(3-methylsulfo…	Substance included in EPA DSSTox FDAMDD: FDA Maximum (Recommended) Daily Dose Database File <a href="http://www.epa.gov/ncct/dsstox/sdf_fdamdd.html"target="_blank">[link to DSSTox SDF Download Page]</a>;ATC code: J01CA10;Activity: Antibacterial;InChIKey: YPBATNHYBCGSSN-VWPFQQQWSA-N;Mechanism of action: By binding to specific penicillin-binding proteins (PBPs) located inside the bacterial cell wal…
182	Antibacterial	DB01000	19003	Cyclacillin	Penicillin	Beta-lactam	Cell wall	InChI=1S/C15H23N3O4S/c1-14(2)9(12(20)21)18-10(19)8(11(18)23-14)17-13(22)15(16)6-4-3-5-7-15/h8-9,11H,3-7,16H2,1-2H3,(H,17,22)(H,20,21)/t8-,9+,11-/m1/s1	HGBLNBBNRORJKI-WCABBAIRSA-N	(2S,5R,6R)-6-[(1-aminocyclohexanecarbonyl)amino]-3,3-dimethyl-7-oxo-4-thia-1-azabicyclo[3.2.0]heptane-2-carboxylic acid	C15H23N3O4S	2	1	4	0	0	3	-1.7718	117.18	3	4	341.432	S1C2N(C(C(=O)[O-])C1(C)C)C(=O)C2NC(=O)C1([NH3+])CCCCC1	Chemical Actions and Uses;Therapeutic Uses;Anti-Bacterial Agents;Anti-Infective Agents;Pharmacologic Actions	ciclacillin;CYCLACILLIN;Bastcillin;Vastcillin;Ciclacillum;Citosarin;Cyclapen;Syngacillin;Ultracillin;Calthor;Vipicil;Wyvital;Orfilina;Aminocyclohexylpenicillin;Cyclapen-W;Ciclacilline;Ciclacillinum;(1-Aminocyclohexyl)penicillin;Ciclacilina;Noblicil;Peamezin;Aminocyclohexyl penicillin;Ciclacilina [INN-Spanish];Ciclacilline [INN-French];Ciclacillinum [INN-Latin];Wy-4508;Penicillin, (aminocyclohexyl…	Deposition record created from database Chemistry on host DrZZLaptop on Oct 30, 2011;"Same as: <a href=""http://pubchem.ncbi.nlm.nih.gov/summary/summary.cgi?sid=7848397"">D01334</a>";"Same as: <a href=""http://pubchem.ncbi.nlm.nih.gov/summary/summary.cgi?sid=583155"">C12766</a>";Depositor-supplied synonyms are taken from MeSH (Medical Subject Headings).;Prestwick:1120;on human health by curating …
183	Antibacterial	DB01053	640429	Penicillin G	Penicillin	Beta-lactam	Cell wall	InChI=1S/C16H18N2O4S/c1-16(2)12(15(21)22)18-13(20)11(14(18)23-16)17-10(19)8-9-6-4-3-5-7-9/h3-7,11-12,14H,8H2,1-2H3,(H,17,19)(H,21,22)/p-1/t11-,12+,14-/m1/s1	JGSARLDLIJGVTE-MBNYWOFBSA-M	(2S,5R,6R)-3,3-dimethyl-7-oxo-6-[(2-phenylacetyl)amino]-4-thia-1-azabicyclo[3.2.0]heptane-2-carboxylate	C16H17N2O4S-	2	1	5	0	0	3	-0.47393	89.54	2	4	333.388	S1C2N(C(C(=O)[O-])C1(C)C)C(=O)C2NC(=O)Cc1ccccc1	Chemical Actions and Uses;Therapeutic Uses;Antineoplastic Agents;Pharmacologic Actions	PENICILLIN-G;AC1LD0NQ;CHEBI:51354;ZINC03871701;PICIBANIL;NCGC00021679-03;NCGC00021679-04;LS-195224;AB00384263;Sapylin;2,2-dimethyl-6beta-(phenylacetamido)penam-3alpha-carboxylate;CCRIS 2776;DNC000302;OK 432;113-98-4;(2S,5R,6R)-3,3-dimethyl-7-oxo-6-[(2-phenylacetyl)amino]-4-thia-1-azabicyclo[3.2.0]heptane-2-carboxylate;(2S,5R,6R)-3,3-dimethyl-7-oxo-6-[(phenylacetyl)amino]-4-thia-1-azabicyclo[3.2.0…	(2S,5R,6R)-3,3-dimethyl-7-oxidanylidene-6-(2-phenylethanoylamino)-4-thia-1-azabicyclo[3.2.0]heptane-2-carboxylate;"<a target=_blank href=""http://boschesci.com?P2335"">Bosche Scientific P2335</A>";"<a target=_blank href=""http://cgi.www.apolloscientific.co.uk/cgi-bin/www.apolloscientific.co.uk/csvread.pl?database=db2&search=BIP0142"">Apollo Scientific BIP0142</A>";"<a target=_blank href=""http://…
184	Antibacterial	DB01060	33613	Amoxicillin	Penicillin	Beta-lactam	Cell wall	InChI=1S/C16H19N3O5S/c1-16(2)11(15(23)24)19-13(22)10(14(19)25-16)18-12(21)9(17)7-3-5-8(20)6-4-7/h3-6,9-11,14,20H,17H2,1-2H3,(H,18,21)(H,23,24)/t9-,10-,11+,14-/m1/s1	LSQZJLSUYDQPKJ-NJBDSQKTSA-N	(2S,5R,6R)-6-[[(2R)-2-amino-2-(4-hydroxyphenyl)acetyl]amino]-3,3-dimethyl-7-oxo-4-thia-1-azabicyclo[3.2.0]heptane-2-carboxylic acid	C16H19N3O5S	3	2	5	0	0	3	-1.9323	137.41	3	5	365.41	S1C2N(C(C(=O)[O-])C1(C)C)C(=O)C2NC(=O)C([NH3+])c1ccc(O)cc1	Chemical Actions and Uses;Anti-Infective Agents;Therapeutic Uses;Anti-Bacterial Agents;Pharmacologic Actions	amoxicillin;Amoxycillin;Amoxicilline;Amoxicillin anhydrous;Amopenixin;Amolin;Moxal;D-Amoxicillin;AMPC;p-Hydroxyampicillin;Amoxicillinum;Amoxicilina;Amoxiden;Amoxivet;Anemolin;Bristamox;Delacillin;Flemoxin;Hiconcil;Histocillin;Imacillin;Unicillin;Vetramox;Amoclen;Amopen;Aspenil;Cemoxin;Clamoxyl;Efpenix;Ibiamox;Moxacin;Piramox;Polymox;Trimox;Utimox;Amoxi;DisperMox;Sumox;Wymox;Amoxi-Mast;Sawamox PM;…	Structure Shown: tested chemical;Indication: For the treatment of infections of the ear, nose, and throat, the genitourinary tract, the skin and skin structure, and the lower respiratory tract due to susceptible (only b-lactamase-negative) strains of Streptococcus spp. (a- and b-hemolytic strains only), S. pneumoniae, Staphylococcus spp., H. influenzae, E. coli, P. mirabilis, or E. faecalis. Also…
185	Antibacterial	DB01061	5284519	Azlocillin	Penicillin	Beta-lactam	Cell wall	InChI=1S/C20H23N5O6S/c1-20(2)13(17(28)29)25-15(27)12(16(25)32-20)22-14(26)11(10-6-4-3-5-7-10)23-19(31)24-9-8-21-18(24)30/h3-7,11-13,16H,8-9H2,1-2H3,(H,21,30)(H,22,26)(H,23,31)(H,28,29)/t11-,12+,13-,16+/m0/s1	JTWOMNBEOCYFNV-RSUWNVLCSA-N	(2S,5R,6R)-3,3-dimethyl-7-oxo-6-[[(2S)-2-[(2-oxoimidazolidine-1-carbonyl)amino]-2-phenylacetyl]amino]-4-thia-1-azabicyclo[3.2.0]heptane-2-carboxylic acid	C20H23N5O6S	4	3	8	1	2	4	-1.145	150.98	5	6	460.491	S1C2N(C(C(=O)[O-])C1(C)C)C(=O)C2NC(=O)C(NC(=O)N1CCNC1=O)c1ccccc1	Pharmacologic Actions;Chemical Actions and Uses;Anti-Bacterial Agents;Anti-Infective Agents;Therapeutic Uses	azlocillin;Azlocillin (USAN/INN);AC1NR4M1;C06839;D02339;Azlocilina;Azlocilline;Azlocillinum;Securopen;I06-1570;37091-66-0;AC1LCWAC;Spectrum_001382;(2S,5R,6R)-3,3-dimethyl-7-oxo-6-[[(2S)-2-[(2-oxoimidazolidine-1-carbonyl)amino]-2-phenylacetyl]amino]-4-thia-1-azabicyclo[3.2.0]heptane-2-carboxylic acid;(2S,5R,6R)-3,3-dimethyl-7-oxo-6-{[(2S)-2-{[(2-oxoimidazolidin-1-yl)carbonyl]amino}-2-phenylacetyl]…	(2S,5R,6R)-3,3-dimethyl-7-oxidanylidene-6-[[(2S)-2-[(2-oxidanylideneimidazolidin-1-yl)carbonylamino]-2-phenyl-ethanoyl]amino]-4-thia-1-azabicyclo[3.2.0]heptane-2-carboxylic acid;Activity: Antibacterial;ATC code: J01CA09;"For further information visit the FDA Maximum Recommended Therapeutic Dose Database <a href=""http://www.fda.gov/AboutFDA/CentersOffices/CDER/ucm092199.htm""target=""_blank"">Web…
186	Antibacterial	DB01147	6098	Cloxacillin	Penicillin	Beta-lactam	Cell wall	InChI=1S/C19H18ClN3O5S/c1-8-11(12(22-28-8)9-6-4-5-7-10(9)20)15(24)21-13-16(25)23-14(18(26)27)19(2,3)29-17(13)23/h4-7,13-14,17H,1-3H3,(H,21,24)(H,26,27)/t13-,14+,17-/m1/s1	LQOLIRLGBULYKD-JKIFEVAISA-N	(2S,5R,6R)-6-[[3-(2-chlorophenyl)-5-methyl-1,2-oxazole-4-carbonyl]amino]-3,3-dimethyl-7-oxo-4-thia-1-azabicyclo[3.2.0]heptane-2-carboxylic acid	C19H18ClN3O5S	3	1	5	0	0	4	1.21402	115.57	3	5	434.88	Clc1ccccc1-c1noc(C)c1C(=O)NC1C2SC(C)(C)C(N2C1=O)C(=O)[O-]	Chemical Actions and Uses;Anti-Bacterial Agents;Anti-Infective Agents;Therapeutic Uses;Pharmacologic Actions	cloxacillin;Cloxacilline;Cloxacillinum;Cloxacilina;Clossacillina;Syntarpen;Methocillin S;Tegopen;Clossacillina [DCIT];Chloroxacillin;CHEBI:49566;Novo-Cloxin;Nu-Cloxi;BRL 1621;Cloxacilina [INN-Spanish];Cloxacilline [INN-French];Cloxacillinum [INN-Latin];Methylchlorphenylisoxazoryl-penicillin;Tegopen (sodium monohydrate);Orbenin (TN);Cloxacillin (INN);MCIPC;61-72-3;HSDB 3042;Cloxacillin sodium;Spec…	Groups: approved;Activity: Antibiotic, penicillin, penicillinase-resistant;Target: D-alanyl-D-alanine carboxypeptidase inhibitor;ATC code: J01CF02;OR SODIUM SALT; OR SODIUM SALT, MONOHYDRATE; OR BENZATHINE;Anti-Bacterial Agents;BIOA;Structure Shown: tested chemical;Isoxazoles;Human Data;Mechanism of action: By binding to specific penicillin-binding proteins (PBPs) located inside the bacterial cel…
187	Antibacterial	DB01163	36273	Amdinocillin	Penicillin	Beta-lactam	Cell wall	InChI=1S/C15H23N3O3S/c1-15(2)11(14(20)21)18-12(19)10(13(18)22-15)16-9-17-7-5-3-4-6-8-17/h9-11,13H,3-8H2,1-2H3,(H,20,21)/t10-,11+,13-/m1/s1	BWWVAEOLVKTZFQ-NTZNESFSSA-N	(2S,5R,6R)-6-(azepan-1-ylmethylideneamino)-3,3-dimethyl-7-oxo-4-thia-1-azabicyclo[3.2.0]heptane-2-carboxylic acid	C15H23N3O3S	2	0	3	0	0	3	0.0715	76.04	3	3	324.425	S1C2N(C(C(=O)[O-])C1(C)C)C(=O)C2N=CN1CCCCCC1	Anti-Infective Agents, Urinary;Chemical Actions and Uses;Renal Agents;Therapeutic Uses;Pharmacologic Actions;Anti-Bacterial Agents;Anti-Infective Agents	Mecillinam;AMDINOCILLIN;Coactin;Penicillin HX;Mecillinamum;Hexacillin;Mecilinamo;Selexidin;FL 1060;Mecilinamo [INN-Spanish];Mecillinamum [INN-Latin];Mecillinam (INN);Coactin (TN);Ro 10-9070;Amdinocillin (USAN);Amdinocillin [USAN];Amdinocillin Mecillinam;AC1L1VGC;EINECS 251-277-1;32887-01-7;CHEMBL530;Ro 109070;FL-1060;UNII-V10579P3QZ;Ambap32887-01-7;MLS000759478;MLS001424041;CHEMBL258646;6-((Hexah…	Activity: Antibacterial;Mechanism of action: Amdinocillin is a stong and specific antagonist of Penicillin Binding Protein-2 (PBP 2). It is active against gram negative bacteria, preventing cell wall synthesis by inhibiting the activity of PBP2. PBP2 is a peptidoglycan elongation initiating enzyme. Peptidoglycan is a polymer of sugars and amino acids that is the main component of bacterial cell w…
188	Antibacterial	DB01602	71429	Bacampicillin	Penicillin	Beta-lactam	Cell wall	InChI=1S/C21H27N3O7S.ClH/c1-5-29-20(28)31-11(2)30-19(27)15-21(3,4)32-18-14(17(26)24(15)18)23-16(25)13(22)12-9-7-6-8-10-12;/h6-11,13-15,18H,5,22H2,1-4H3,(H,23,25);1H/t11?,13-,14?,15+,18-;/m1./s1	IWVTXAGTHUECPN-WBELVDHVSA-N	1-ethoxycarbonyloxyethyl (2S,5R)-6-[[(2R)-2-amino-2-phenylacetyl]amino]-3,3-dimethyl-7-oxo-4-thia-1-azabicyclo[3.2.0]heptane-2-carboxylate hydrochloride	C21H28ClN3O7S	4	1	11	0	2	3	0.6745	138.88	3	7	466.535	S1C2N(C(C(OC(OC(OCC)=O)C)=O)C1(C)C)C(=O)C2NC(=O)C([NH3+])c1ccccc1	Anti-Bacterial Agents;Pharmacologic Actions;Chemical Actions and Uses;Therapeutic Uses;Anti-Infective Agents	Spectrobid;Ambacamp;Ambaxin;Bacacil;Velbacil;BAPC;EINECS 253-580-4;Penglobe;1-((Ethoxycarbonyl)oxy)ethyl (2S-(2alpha,5alpha,6beta(S*)))-6-(2-amino-2-phenylacetamido)-3,3-dimethyl-7-oxo-4-thia-1-azabicyclo(3.2.0)heptane-2-carboxylate monohydrochloride;4-Thia-1-azabicyclo(3.2.0)heptane-2-carboxylic acid, 6-((aminophenylacetyl)amino)-3,3-dimethyl-7-oxo-, 1-((ethoxycarbonyl)oxy)ethyl ester, hydrochlo…	1-ethoxycarbonyloxyethyl (2S,5R)-6-[[(2R)-2-azanyl-2-phenyl-ethanoyl]amino]-3,3-dimethyl-7-oxidanylidene-4-thia-1-azabicyclo[3.2.0]heptane-2-carboxylate hydrochloride;Drug / Therapeutic Agent;Reproductive Effect
189	Antibacterial	DB01603	6087	Methicillin	Penicillin	Beta-lactam	Cell wall	InChI=1S/C17H20N2O6S/c1-17(2)12(16(22)23)19-14(21)11(15(19)26-17)18-13(20)10-8(24-3)6-5-7-9(10)25-4/h5-7,11-12,15H,1-4H3,(H,18,20)(H,22,23)/t11-,12+,15-/m1/s1	RJQXTJLFIWVMTO-TYNCELHUSA-N	(2S,5R,6R)-6-[(2,6-dimethoxybenzoyl)amino]-3,3-dimethyl-7-oxo-4-thia-1-azabicyclo[3.2.0]heptane-2-carboxylic acid	C17H20N2O6S	4	1	6	0	0	3	-0.3856	108	2	6	379.413	S1C2N(C(C(=O)[O-])C1(C)C)C(=O)C2NC(=O)c1c(OC)cccc1OC	Anti-Bacterial Agents;Pharmacologic Actions;Anti-Infective Agents;Therapeutic Uses;Chemical Actions and Uses	methicillin;Meticillin;Dimocillin;Metacillin;Methicillinum;Methycillin;Meticillinum;Meticilina;Meticilline;Meticillina;Meticilina [INN-Spanish];Meticilline [INN-French];Meticillinum [INN-Latin];Staphcillin;Meticillina [DCIT];(2,6-Dimethoxyphenyl)penicillin;Meticillin [INN];Methicillin [BAN];CHEBI:6827;HSDB 3121;Spectrum_000993;6-(2,6-Dimethoxybenzamido)penicillanic acid;BRL 1241;AC1L1LRX;Spectrum…	For further information visit the FDA Maximum Recommended Therapeutic Dose Database <a href="http://www.fda.gov/AboutFDA/CentersOffices/CDER/ucm092199.htm"target="_blank">Website</a>;Transcription RegulatorANTIBIOTIC;"Substance included in EPA DSSTox FDAMDD: FDA Maximum (Recommended) Daily Dose Database File <a href=""http://www.epa.gov/ncct/dsstox/sdf_fdamdd.html""target=""_blank"">[link to DSST…
190	Antibacterial	DB01604	33478	Pivampicillin	Penicillin	Beta-lactam	Cell wall	InChI=1S/C22H29N3O6S/c1-21(2,3)20(29)31-11-30-19(28)15-22(4,5)32-18-14(17(27)25(15)18)24-16(26)13(23)12-9-7-6-8-10-12/h6-10,13-15,18H,11,23H2,1-5H3,(H,24,26)/t13-,14-,15+,18-/m1/s1	ZEMIJUDPLILVNQ-ZXFNITATSA-N	2,2-dimethylpropanoyloxymethyl (2S,5R,6R)-6-[[(2R)-2-amino-2-phenylacetyl]amino]-3,3-dimethyl-7-oxo-4-thia-1-azabicyclo[3.2.0]heptane-2-carboxylate	C22H29N3O6S	4	1	10	0	2	3	0.7022	129.65	3	6	464.563	S1C2N(C(C(OCOC(=O)C(C)(C)C)=O)C1(C)C)C(=O)C2NC(=O)C([NH3+])c1ccccc1	Chemical Actions and Uses;Anti-Bacterial Agents;Anti-Infective Agents;Therapeutic Uses;Pharmacologic Actions	Pivampicillin;Pivaloylampicillin;Pivampicilina;Pivampicilline;Pivampicillinum;Pivaloyloxymethyl ampicillinate;Pondocillin;Ampicillin pivaloyloxymethyl ester;Pivampicilina [INN-Spanish];Pivampicilline [INN-French];Pivampicillinum [INN-Latin];Pivampicillin [INN:BAN];MK 191;Pondocillin (TN);Pivampicillin (INN);Ampicillin Pivaloyl Ester;Prestwick0_001009;Prestwick1_001009;Prestwick2_001009;Prestwick3…	Indication: or the treatment of respiratory tract infections (including acute bronchitis, acute exacerbations of chronic bronchitis and pneumonia); ear, nose and throat infections; gynecological infections; urinary tract infections (including acute uncomplicated gonococcal urethritis) when caused by non penicillinase-producing susceptible strains of the following organisms: gram-positive organism…
191	Antibacterial	DB01607	36921	Ticarcillin	Penicillin	Beta-lactam	Cell wall	InChI=1S/C15H16N2O6S2/c1-15(2)9(14(22)23)17-11(19)8(12(17)25-15)16-10(18)7(13(20)21)6-3-4-24-5-6/h3-5,7-9,12H,1-2H3,(H,16,18)(H,20,21)(H,22,23)/t7-,8-,9+,12-/m1/s1	OHKOGUYZJXTSFX-KZFFXBSXSA-N	(2S,5R,6R)-6-[[(2R)-2-carboxy-2-thiophen-3-ylacetyl]amino]-3,3-dimethyl-7-oxo-4-thia-1-azabicyclo[3.2.0]heptane-2-carboxylic acid	C15H16N2O6S2	2	1	6	0	0	3	-2.1214	129.67	2	6	382.417	S1C2N(C(C(=O)[O-])C1(C)C)C(=O)C2NC(=O)C(C(=O)[O-])c1ccsc1	Chemical Actions and Uses;Pharmacologic Actions;Anti-Bacterial Agents;Anti-Infective Agents;Therapeutic Uses	TICARCILLIN;Ticarcilina;Ticarcilline;Ticarcillinum;Ticarcilina [INN-Spanish];Ticarcilline [INN-French];Ticarcillinum [INN-Latin];Ticarcillin Supplement;CHEBI:9587;EINECS 252-213-5;34787-01-4;Ticarcillin (INN);TIPC;4-Thia-1-azabicyclo(3.2.0)heptane-2-carboxylic acid, 6-((carboxy-3-thienylacetyl)amino)-3,3-dimethyl-7-oxo-, (2S-(2alpha,5alpha,6beta(S*)))-;AC1L1WMX;AC1Q5QWE;Ticarcillin [INN:BAN];BRL-…	Same as: <a href="http://pubchem.ncbi.nlm.nih.gov/summary/summary.cgi?sid=9348">C07139</a>;Groups: approved;Mechanism of action: Ticarcillin's antibiotic properties arise from its ability to prevent cross-linking of peptidoglycan during cell wall synthesis when the bacteria tries to divide, causing death.;Target: D-alanyl-D-alanine carboxypeptidase inhibitor;Structure Shown: tested chemical;(2S,5…
192	Antibacterial	DB08795	71886	Azidocillin	Penicillin	Beta-lactam	Cell wall	InChI=1S/C16H17N5O4S/c1-16(2)11(15(24)25)21-13(23)10(14(21)26-16)18-12(22)9(19-20-17)8-6-4-3-5-7-8/h3-7,9-11,14H,1-2H3,(H,18,22)(H,24,25)	ODFHGIPNGIAMDK-UHFFFAOYSA-N	6-[(2-azido-2-phenylacetyl)amino]-3,3-dimethyl-7-oxo-4-thia-1-azabicyclo[3.2.0]heptane-2-carboxylic acid	C16H17N5O4S	4	1	6	0	1	3	0.4305	114.26	5	4	374.401	S1C2N(C(C(=O)[O-])C1(C)C)C(=O)C2NC(=O)C(N=[N+]=[N-])c1ccccc1		Azidocillina;6-{[azido(phenyl)acetyl]amino}-3,3-dimethyl-7-oxo-4-thia-1-azabicyclo[3.2.0]heptane-2-carboxylic acid;17243-38-8;AC1L2GZV;AC1Q5UVC;SPC 297 D;BRL 2534;AR-1H0728;DB08795;6-[(2-azido-2-phenylacetyl)amino]-3,3-dimethyl-7-oxo-4-thia-1-azabicyclo[3.2.0]heptane-2-carboxylic acid	6-[(2-azido-2-phenyl-ethanoyl)amino]-3,3-dimethyl-7-oxidanylidene-4-thia-1-azabicyclo[3.2.0]heptane-2-carboxylic acid;Groups: approved;Indication: For treatment of infection (Respiratory, GI, UTI and meningitis) due to E. coli, P. mirabilis, enterococci, Shigella, S. typhosa and other Salmonella, nonpenicillinase-producing N. gononhoeae, H. influenzae, staphylococci, streptococci including strept…
193	Antibacterial		39031	Sulbenicillin	Penicillin	Beta-lactam	Cell wall	InChI=1S/C16H18N2O7S2/c1-16(2)11(15(21)22)18-13(20)9(14(18)26-16)17-12(19)10(27(23,24)25)8-6-4-3-5-7-8/h3-7,9-11,14H,1-2H3,(H,17,19)(H,21,22)(H,23,24,25)/t9-,10?,11+,14-/m1/s1	JETQIUPBHQNHNZ-OAYJICASSA-N	(2S,5R,6R)-3,3-dimethyl-7-oxo-6-[(2-phenyl-2-sulfoacetyl)amino]-4-thia-1-azabicyclo[3.2.0]heptane-2-carboxylic acid	C16H18N2O7S2	2	1	6	0	1	3	-1.3346	140.75	2	7	412.443	S1C2N(C(C(=O)[O-])C1(C)C)C(=O)C2NC(=O)C(S(=O)(=O)[O-])c1ccccc1	Chemical Actions and Uses;Therapeutic Uses;Anti-Bacterial Agents;Anti-Infective Agents;Pharmacologic Actions	Sulbenicillin;Kedacillina;Sulbenicilina;Sulbenicilline;Sulbenicillinum;Sulfocillin;SBPC;Sulbenicilina [INN-Spanish];Sulbenicilline [INN-French];Sulbenicillinum [INN-Latin];EINECS 255-528-6;Sulbenicillin (INN);Sulbenicillin [INN];(2S,5R,6R)-3,3-Dimethyl-7-oxo-6-((R,S)-2-phenyl-2-sulfoacetamido)-4-thia-1-azabicyclo(3.2.0)heptan-2-carbonsaeure;3,3-Dimethyl-7-oxo-6-(2-phenyl-2-sulfoacetamido)-4-thia-…	Same as: <a href="http://pubchem.ncbi.nlm.nih.gov/summary/summary.cgi?sid=13352">C11170</a>;Activity: Antibiotic, penicillin, broad-spectrum;ATC code: J01CA16;InChIKey: JETQIUPBHQNHNZ-OAYJICASSA-N;(2S,5R,6R)-3,3-dimethyl-7-oxidanylidene-6-[(2-phenyl-2-sulfo-ethanoyl)amino]-4-thia-1-azabicyclo[3.2.0]heptane-2-carboxylic acid;Anti-Bacterial Agents;Whole Molecule;Anti-Infective Agents;Target: D-alan…
194	Antibacterial		65039	Propicillin	Penicillin	Beta-lactam	Cell wall	InChI=1S/C18H22N2O5S/c1-4-11(25-10-8-6-5-7-9-10)14(21)19-12-15(22)20-13(17(23)24)18(2,3)26-16(12)20/h5-9,11-13,16H,4H2,1-3H3,(H,19,21)(H,23,24)	HOCWPKXKMNXINF-UHFFFAOYSA-N	3,3-dimethyl-7-oxo-6-(2-phenoxybutanoylamino)-4-thia-1-azabicyclo[3.2.0]heptane-2-carboxylic acid	C18H22N2O5S	3	1	7	0	0	3	0.141	98.77	2	5	377.441	S1C2N(C(C(=O)[O-])C1(C)C)C(=O)C2NC(=O)C(Oc1ccccc1)CC		551-27-9;(1-Phenoxypropyl)penicillin;AC1L22GE;(2S,5R,6R)-3,3-dimethyl-7-oxo-6-[(2-phenoxybutanoyl)amino]-4-thia-1-azabicyclo[3.2.0]heptane-2-carboxylic acid;3,3-dimethyl-7-oxo-6-(2-phenoxybutanoylamino)-4-thia-1-azabicyclo[3.2.0]heptane-2-carboxylic acid	3,3-dimethyl-7-oxidanylidene-6-(2-phenoxybutanoylamino)-4-thia-1-azabicyclo[3.2.0]heptane-2-carboxylic acid
195	Antibacterial		71392	Epicillin	Penicillin	Beta-lactam	Cell wall	InChI=1S/C16H21N3O4S/c1-16(2)11(15(22)23)19-13(21)10(14(19)24-16)18-12(20)9(17)8-6-4-3-5-7-8/h3-4,7,9-11,14H,5-6,17H2,1-2H3,(H,18,20)(H,22,23)/t9-,10-,11+,14-/m1/s1	RPBAFSBGYDKNRG-NJBDSQKTSA-N	(2S,5R,6R)-6-[[(2R)-2-amino-2-cyclohexa-1,4-dien-1-ylacetyl]amino]-3,3-dimethyl-7-oxo-4-thia-1-azabicyclo[3.2.0]heptane-2-carboxylic acid	C16H21N3O4S	2	1	5	0	0	3	-1.8297	117.18	3	4	351.427	S1C2N(C(C(=O)[O-])C1(C)C)C(=O)C2NC(=O)C([NH3+])C=1CC=CCC=1	Anti-Infective Agents;Therapeutic Uses;Anti-Bacterial Agents;Pharmacologic Actions;Chemical Actions and Uses	Epicillin;Dexacillin;Dihydroampicillin;Epicillinum;Epicilina;Epicilline;Epicilina [INN-Spanish];Epicilline [INN-French];Epicillinum [INN-Latin];SQ 11302;EINECS 248-001-7;BRN 1091831;26774-90-3;d-a-amino-(1,4-cyclohexadien-1-yl)methylpenicillin;4-Thia-1-azabicyclo(3.2.0)heptane-2-carboxylic acid, 6-((amino-1,4-cyclohexadien-1-ylacetyl)amino)-3,3-dimethyl-7-oxo-, (2S-(2alpha,5alpha,6beta(S*)))-;4-T…	(2S,5R,6R)-6-[[(2R)-2-azanyl-2-cyclohexa-1,4-dien-1-yl-ethanoyl]amino]-3,3-dimethyl-7-oxidanylidene-4-thia-1-azabicyclo[3.2.0]heptane-2-carboxylic acid;Activity: Antibacterial;Anti-Bacterial Agents;Anti-Infective Agents;ATC code: J01CA07
196	Antibacterial		71447	Talampicillin	Penicillin	Beta-lactam	Cell wall	InChI=1S/C24H23N3O6S/c1-24(2)17(22(31)33-23-14-11-7-6-10-13(14)21(30)32-23)27-19(29)16(20(27)34-24)26-18(28)15(25)12-8-4-3-5-9-12/h3-11,15-17,20,23H,25H2,1-2H3,(H,26,28)/t15-,16-,17+,20-,23?/m1/s1	SOROUYSPFADXSN-SUWVAFIASA-N	(3-oxo-1H-2-benzofuran-1-yl) (2S,5R,6R)-6-[[(2R)-2-amino-2-phenylacetyl]amino]-3,3-dimethyl-7-oxo-4-thia-1-azabicyclo[3.2.0]heptane-2-carboxylate	C24H23N3O6S	4	1	7	0	3	5	1.1201	129.65	3	6	482.537	S1C2N(C(C(OC3OC(=O)c4c3cccc4)=O)C1(C)C)C(=O)C2NC(=O)C([NH3+])c1ccccc1	Anti-Bacterial Agents;Anti-Infective Agents;Chemical Actions and Uses;Pharmacologic Actions;Therapeutic Uses	TALAMPICILLIN;3-phthalidyl(2s,5r,6r)-6-((r)-2-amino-2-phenylacetamido)-3,3-dimethyl-7-oxo-4-thia-1-azabicyclo(3.2.0)heptan-2-carboxylat;47747-56-8;PC 183;Talampicillin [INN:BAN];Talampicilina [INN-Spanish];Talampicilline [INN-French];Talampicillinum [INN-Latin];Talampicilina;Talampicilline;Talampicillinum;EINECS 256-332-3;TAPC;Talampicillin (INN);Prestwick0_001010;Prestwick1_001010;Prestwick2_001…	(3-oxidanylidene-1H-2-benzofuran-1-yl) (2S,5R,6R)-6-[[(2R)-2-azanyl-2-phenyl-ethanoyl]amino]-3,3-dimethyl-7-oxidanylidene-4-thia-1-azabicyclo[3.2.0]heptane-2-carboxylate;Activity: Antibiotic, penicillin, broad-spectrum; Antibiotic, penicillinase-sensitive;Anti-Bacterial Agents;Anti-Infective Agents;ATC code: J01CA15;"Same as: <a href=""http://pubchem.ncbi.nlm.nih.gov/summary/summary.cgi?sid=13916…
197	Antibacterial		71807	Clometocillin	Penicillin	Beta-lactam	Cell wall	InChI=1S/C17H18Cl2N2O5S/c1-17(2)12(16(24)25)21-14(23)10(15(21)27-17)20-13(22)11(26-3)7-4-5-8(18)9(19)6-7/h4-6,10-12,15H,1-3H3,(H,20,22)(H,24,25)/t10-,11?,12+,15-/m1/s1	JKXQBIZCQJLVOS-GSNLGQFWSA-N	(2S,5R,6R)-6-[[2-(3,4-dichlorophenyl)-2-methoxyacetyl]amino]-3,3-dimethyl-7-oxo-4-thia-1-azabicyclo[3.2.0]heptane-2-carboxylic acid	C17H18Cl2N2O5S	3	1	6	0	0	3	1.0734	98.77	2	5	432.304	Clc1cc(ccc1Cl)C(OC)C(=O)NC1C2SC(C)(C)C(N2C1=O)C(=O)[O-]		Clometocilina;Clometocillin;Clometocilline;Clometocillinum;Clometacillin;no. 356;1926-49-4;Rixapen;Penicilline 356;Clometocillin (INN);AC1L2GTY;AC1Q5QWO;UNII-YI8LL014GF;Clometocilina [INN-Spanish];Clometocilline [INN-French];Clometocillinum [INN-Latin];EINECS 217-657-6;AR-1K7861;3,4-Dichloro-alpha-methoxybenzylpenicillin;(3,4-Dichloro-alpha-methoxybenzyl)penicillin;D07236;(2S,5R,6R)-6-(2-(3,4-Dic…	(2S,5R,6R)-6-[[2-(3,4-dichlorophenyl)-2-methoxy-ethanoyl]amino]-3,3-dimethyl-7-oxidanylidene-4-thia-1-azabicyclo[3.2.0]heptane-2-carboxylic acid;Activity: Antibiotic, penicillin; penicillinase-sensitive;ATC code: J01CE07
198	Antibacterial		171758	Temocillin	Penicillin	Beta-lactam	Cell wall	InChI=1S/C16H18N2O7S2/c1-15(2)9(12(22)23)18-13(24)16(25-3,14(18)27-15)17-10(19)8(11(20)21)7-4-5-26-6-7/h4-6,8-9,14H,1-3H3,(H,17,19)(H,20,21)(H,22,23)/t8?,9-,14+,16-/m0/s1	BVCKFLJARNKCSS-DWPRYXJFSA-N	(2S,5R,6S)-6-[(2-carboxy-2-thiophen-3-ylacetyl)amino]-6-methoxy-3,3-dimethyl-7-oxo-4-thia-1-azabicyclo[3.2.0]heptane-2-carboxylic acid	C16H18N2O7S2	3	1	7	0	1	3	-2.1473	138.9	2	7	412.443	S1C2N(C(C(=O)[O-])C1(C)C)C(=O)C2(OC)NC(=O)C(C(=O)[O-])c1ccsc1	Temocillin;Temocilline;Temocillinum;Temocillina;BRL 17421;Temocilline [INN-French];Temocillinum [INN-Latin];Temocillina [INN-Spanish];CHEBI:51817;EINECS 266-184-1;66148-78-5;4-Thia-1-azabicyclo(3.2.0)heptane-2-carboxylic acid, 6-((carboxy-3-thienylacetyl)amino)-6-methoxy-3,3-dimethyl-7-oxo-, (2S-(2alpha,5alpha,6alpha))-;N-((2S,5R,6S)-2-Carboxy-6-methoxy-3,3-dimethyl-7-oxo-4-thia-1-azabicyclo(3.2.…	Antibiotics;Anti-Infective Agents;Activity: Antibacterial;ATC code: J01CA17;(2S,5R,6S)-6-methoxy-3,3-dimethyl-7-oxidanylidene-6-[(3-oxidanyl-3-oxidanylidene-2-thiophen-3-yl-propanoyl)amino]-4-thia-1-azabicyclo[3.2.0]heptane-2-carboxylic acid;Anti-Bacterial Agents	Chemical Actions and Uses;Anti-Bacterial Agents;Pharmacologic Actions;Anti-Infective Agents;Therapeutic Uses
199	Antibacterial		272833	Pheneticillin	Penicillin	Beta-lactam	Cell wall	InChI=1S/C17H20N2O5S/c1-9(24-10-7-5-4-6-8-10)13(20)18-11-14(21)19-12(16(22)23)17(2,3)25-15(11)19/h4-9,11-12,15H,1-3H3,(H,18,20)(H,22,23)/t9?,11-,12+,15-/m1/s1	NONJJLVGHLVQQM-JHXYUMNGSA-N	(2S,5R,6R)-3,3-dimethyl-7-oxo-6-(2-phenoxypropanoylamino)-4-thia-1-azabicyclo[3.2.0]heptane-2-carboxylic acid	C17H20N2O5S	3	1	6	0	0	3	-0.2491	98.77	2	5	363.414	S1C2N(C(C(=O)[O-])C1(C)C)C(=O)C2NC(=O)C(Oc1ccccc1)C	phenethicillin;Pheneticillin;Feneticilina;Pheneticilline;Pheneticillinum;Phenoxy PC;Phenethicilin;1-Phenoxyethylpenicillin;Phenoxyethylpenicillin;CHEBI:52427;(2S,5R,6R)-3,3-dimethyl-7-oxo-6-[(2-phenoxypropanoyl)amino]-4-thia-1-azabicyclo[3.2.0]heptane-2-carboxylic acid;Phenethicillinum;Phenethicillin potassium salt;147-55-7;Feneticillina [DCIT];Feneticilina [INN-Spanish];Pheneticilline [INN-Frenc…	Whole Molecule;Target: D-alanyl-D-alanine carboxypeptidase inhibitor;Structure Shown: tested chemical;Structure Evaluation:Consistent with Molecular Formula.;Anti-Bacterial Agents;BIOA;ATC code: J01CE05;(2S,5R,6R)-3,3-dimethyl-7-oxidanylidene-6-(2-phenoxypropanoylamino)-4-thia-1-azabicyclo[3.2.0]heptane-2-carboxylic acid;DTP/NCI DIS cdk 1.4.4. Release-October 2011.;Anti-Infective Agents;Activity:…	Chemical Actions and Uses;Pharmacologic Actions;Therapeutic Uses;Anti-Bacterial Agents;Anti-Infective Agents
200	Antibacterial		6713928	Metampicillin	Penicillin	Beta-lactam	Cell wall	InChI=1S/C17H19N3O4S/c1-17(2)12(16(23)24)20-14(22)11(15(20)25-17)19-13(21)10(18-3)9-7-5-4-6-8-9/h4-8,10-12,15H,3H2,1-2H3,(H,19,21)(H,23,24)/t10-,11-,12+,15-/m1/s1	FZECHKJQHUVANE-MCYUEQNJSA-N	(2S,5R,6R)-3,3-dimethyl-6-[[(2R)-2-(methylideneamino)-2-phenylacetyl]amino]-7-oxo-4-thia-1-azabicyclo[3.2.0]heptane-2-carboxylic acid	C17H19N3O4S	3	1	6	0	0	3	-0.1792	101.9	3	4	360.414	S1C2N(C(C(=O)[O-])C1(C)C)C(=O)C2NC(=O)C(N=C)c1ccccc1	metampicillin;Metampicilina;Metampicilline;Metampicillinum;metampilene;Celinmicina;Elatocilline;Metampicillina;Pangocilin;Relyothenate;Blomopen;Bonopen;Filorex;Magnipen;Metambac;Probiotic;Rutizina;Sedomycin;Suvipen;Viderpin;Vioplex;Teonicon Trofen;Italcina kapseln;Rastomycin K;Suvipen ampullen;Meta-Alvar;Metiskia ampullen;Micinovo ampullen;Rutizina ampullen;Tampilen ampullen;Fedacilina kapseln;Me…	ATC code: J01CA14;(2S,5R,6R)-3,3-dimethyl-6-[[(2R)-2-(methylideneamino)-2-phenyl-ethanoyl]amino]-7-oxidanylidene-4-thia-1-azabicyclo[3.2.0]heptane-2-carboxylic acid;Anti-Infective Agents;BIOA;Anti-Bacterial Agents;Activity: Antibiotic, penicillin, broad-spectrum; Antibiotic, penicillin, penicillinase-sensitive	Anti-Infective Agents;Therapeutic Uses;Chemical Actions and Uses;Anti-Bacterial Agents;Pharmacologic Actions
201	Antibacterial		33672	Carfecillin	Penicillin	Beta-lactam	Cell wall	InChI=1S/C23H22N2O6S/c1-23(2)17(21(28)29)25-19(27)16(20(25)32-23)24-18(26)15(13-9-5-3-6-10-13)22(30)31-14-11-7-4-8-12-14/h3-12,15-17,20H,1-2H3,(H,24,26)(H,28,29)/t15?,16-,17+,20-/m1/s1	NZDASSHFKWDBBU-KVMCETHSSA-N	(2S,5R,6R)-3,3-dimethyl-7-oxo-6-[(3-oxo-3-phenoxy-2-phenylpropanoyl)amino]-4-thia-1-azabicyclo[3.2.0]heptane-2-carboxylic acid	C23H22N2O6S	3	1	8	0	1	4	0.6728	115.84	2	6	453.495	S1C2N(C(C(=O)[O-])C1(C)C)C(=O)C2NC(=O)C(C(Oc1ccccc1)=O)c1ccccc1	Carfecillin;Carbenicillin phenyl;Carfecilina;Carfecilline;Carfecillinum;Carbenicillin phenyl ester;Carfecilina [INN-Spanish];Carfecilline [INN-French];Carfecillinum [INN-Latin];CHEBI:3414;EINECS 248-171-2;6-(2-Phenoxycarbonyl-2-phenylacetamido)penicillansaeure;BRN 1095507;27025-49-6;(2S,5R,6R)-3,3-Dimethyl-7-oxo-6-((2-phenoxycarbonyl)-2-phenylacetamido)-4-thia-1-azabicyclo(3.2.0)heptan-2-carbonsa…	Anti-infective agents, urinary;Anti-Infective Agents;InChIKey: NZDASSHFKWDBBU-KVMCETHSSA-N;Whole Molecule;Drug / Therapeutic Agent;Anti-Bacterial Agents;(2S,5R,6R)-3,3-dimethyl-7-oxidanylidene-6-[(3-oxidanylidene-3-phenoxy-2-phenyl-propanoyl)amino]-4-thia-1-azabicyclo[3.2.0]heptane-2-carboxylic acid;Renal Agents	Anti-Bacterial Agents;Pharmacologic Actions;Anti-Infective Agents, Urinary;Chemical Actions and Uses;Renal Agents;Anti-Infective Agents;Therapeutic Uses
202	Antibacterial	DB00314	3032401	Capreomycin	Peptide	Peptide	70S Ribosome	InChI=1S/C25H44N14O8/c26-4-1-2-11(27)6-17(41)32-8-14-20(43)35-15(9-34-25(30)47)21(44)39-18(13-3-5-31-24(29)38-13)23(46)33-7-12(28)19(42)37-16(10-40)22(45)36-14/h9,11-14,16,18,40H,1-8,10,26-28H2,(H,32,41)(H,33,46)(H,35,43)(H,36,45)(H,37,42)(H,39,44)(H3,29,31,38)(H3,30,34,47)/b15-9-	JNIIDKODPGHQSS-DHDCSXOGSA-N	3,6-diamino-N-[[(8Z)-15-amino-11-(2-amino-1,4,5,6-tetrahydropyrimidin-6-yl)-8-[(carbamoylamino)methylidene]-2-(hydroxymethyl)-3,6,9,12,16-pentaoxo-1,4,7,10,13-pentazacyclohexadec-5-yl]methyl]hexanamide	C25H44N14O8	8	9	12	3	5	2	-12.3046	384.89	14	8	672.749	O=C1NCC([NH3+])C(=O)NC(CO)C(=O)NC(CNC(=O)CC([NH3+])CCC[NH3+])C(=O)NC(=CNC(=O)N)C(=O)NC1C1NC(=[NH+]CC1)N		Capromycin;Capreomicina;Capreomycine;Capreomycinum;Kapreomycin;AC1MHU26;CHEMBL1201252;HMS500N21;IDI1_000279;NCGC00167473-01;3,6-diamino-N-[[(8Z)-15-amino-11-(2-amino-1,4,5,6-tetrahydropyrimidin-6-yl)-8-[(carbamoylamino)methylidene]-2-(hydroxymethyl)-3,6,9,12,16-pentaoxo-1,4,7,10,13-pentazacyclohexadec-5-yl]methyl]hexanamide	N-[[(8Z)-8-[(aminocarbonylamino)methylidene]-15-azanyl-11-(2-azanyl-1,4,5,6-tetrahydropyrimidin-6-yl)-2-(hydroxymethyl)-3,6,9,12,16-pentakis(oxidanylidene)-1,4,7,10,13-pentazacyclohexadec-5-yl]methyl]-3,6-bis(azanyl)hexanamide;NINDS:1500157;1200555
203	Antibacterial		3032903	Enviomycin	Peptide	Peptide	70S Ribosome	InChI=1S/C25H43N13O10/c26-3-1-16(41)10(27)5-17(42)33-12-6-31-23(47)18(11-2-4-30-24(28)37-11)38-20(44)13(7-32-25(29)48)34-21(45)14(8-39)36-22(46)15(9-40)35-19(12)43/h7,10-12,14-16,18,39-41H,1-6,8-9,26-27H2,(H,31,47)(H,33,42)(H,34,45)(H,35,43)(H,36,46)(H,38,44)(H3,28,30,37)(H3,29,32,48)/b13-7-/t10?,11?,12?,14?,15?,16?,18-/m1/s1	HPWIIERXAFODPP-HJSHBDTPSA-N	3,6-diamino-N-[(3R,6Z)-3-(2-amino-1,4,5,6-tetrahydropyrimidin-6-yl)-6-[(carbamoylamino)methylidene]-9,12-bis(hydroxymethyl)-2,5,8,11,14-pentaoxo-1,4,7,10,13-pentazacyclohexadec-15-yl]-4-hydroxyhexanamide	C25H43N13O10	10	11	12	3	5	2	-12.5834	397.71	13	10	688.724	O=C1NCC(NC(=O)CC([NH3+])C(O)CC[NH3+])C(=O)NC(CO)C(=O)NC(CO)C(=O)NC(=CNC(=O)N)C(=O)NC1C1NC(=[NH+]CC1)N		Tuberactinomycin N;Enviomycin [INN];ENVIOMYCIN;Enviomycine [INN-French];Enviomycinum [INN-Latin];Enviomycina [INN-Spanish];Tuberactinomycin-N;AC1MHUXT;Viomycin, 1-((3R,4R)-4-hydroxy-3,6-diaminohexanoic acid)-6-(L-2-(2-amino-1,4,5,6-tetrahydro-4-pyrimidinyl)glycine)-, (R)-;Viomycin, 1-(threo-4-hydroxy-L-3,6-diaminohexanoic acid)-6-(L-2-(2-amino-1,4,5,6-tetrahydro-4-pyrimidinyl)glycine)-, (R)-;LS-1…	N-[(3R,6Z)-6-[(aminocarbonylamino)methylidene]-3-(2-azanyl-1,4,5,6-tetrahydropyrimidin-6-yl)-9,12-bis(hydroxymethyl)-2,5,8,11,14-pentakis(oxidanylidene)-1,4,7,10,13-pentazacyclohexadec-15-yl]-3,6-bis(azanyl)-4-oxidanyl-hexanamide
204	Antibacterial	DB00080	21585658	Daptomycin	Peptide	Peptide	Cell wall	InChI=1S/C72H101N17O26/c1-5-6-7-8-9-10-11-22-53(93)81-44(25-38-31-76-42-20-15-13-17-39(38)42)66(108)84-45(27-52(75)92)67(109)86-48(30-59(102)103)68(110)89-61-37(4)115-72(114)49(26-51(91)40-18-12-14-19-41(40)74)87-71(113)60(35(2)24-56(96)97)88-69(111)50(34-90)82-55(95)32-77-63(105)46(28-57(98)99)83-62(104)36(3)79-65(107)47(29-58(100)101)85-64(106)43(21-16-23-73)80-54(94)33-78-70(61)112/h12-15,17-2…	DOAKLVKFURWEDJ-QCMAZARJSA-N		C72H101N17O26	17	17	39	3	5	4	-11.6774	714.96	17	26	1617.67	O1C(C)C(NC(=O)C(NC(=O)C(NC(=O)C(NC(=O)CCCCCCCCC)Cc2c3c([nH]c2)cccc3)CC(=O)N)CC(=O)[O-])C(=O)NCC(=O)NC(CCC[NH3+])C(=O)NC(CC(=O)[O-])C(=O)NC(C)C(=O)NC(CC(=O)[O-])C(=O)NCC(=O)NC(CO)C(=O)NC(C(CC(=O)[O-])C)C(=O)NC(CC(=O)c2ccccc2N)C1=O	Chemical Actions and Uses;Pharmacologic Actions;Anti-Bacterial Agents;Anti-Infective Agents;Therapeutic Uses	DAPTOMYCIN;Daptomicina;Daptomycine;Daptomycinum;Cidecin;Cubicin;Dapcin;Cubicin (TN);Daptomycin (JAN/USAN/INN);CHEBI:600103;MK-3009;LY-146032;D01080;N-decanoyl-L-tryptophyl-D-asparaginyl-L-aspartyl-L-threonylglycyl-L-ornithyl-L-aspartyl-D-alanyl-L-aspartylglycyl-D-seryl-threo-3-methyl-L-glutamyl-3-anthraniloyl-L-alanine 1.13-3.4-lactone;N-decanoyl-L-tryptophyl-D-asparaginyl-L-aspartyl-L-threonylgl…	A naturally-occurring compound found in the soil saprotroph Streptomyces roseosporus, daptomycin is effective against Gram-positive bacteria and is used in the treatment of complicated Gram-positive infections of the skin and soft tissues. It has also been investigated for the treatment of vancomycin-resistant enterococcal infections, complicated urinary tract infections, and community-acquired p…
205	Antibacterial	DB00512	14969	Vancomycin	Peptide	Peptide	Cell wall	InChI=1S/C66H75Cl2N9O24/c1-23(2)12-34(71-5)58(88)76-49-51(83)26-7-10-38(32(67)14-26)97-40-16-28-17-41(55(40)101-65-56(54(86)53(85)42(22-78)99-65)100-44-21-66(4,70)57(87)24(3)96-44)98-39-11-8-27(15-33(39)68)52(84)50-63(93)75-48(64(94)95)31-18-29(79)19-37(81)45(31)30-13-25(6-9-36(30)80)46(60(90)77-50)74-61(91)47(28)73-59(89)35(20-43(69)82)72-62(49)92/h6-11,13-19,23-24,34-35,42,44,46-54,56-57,65,71,…	MYPYJXKWCTUITO-LYRMYLQWSA-N		C66H75Cl2N9O24	20	16	14	3	5	10	-2.494	539.52	9	24	1450.28	Clc1c2Oc3cc4C(NC(=O)C(NC(=O)C(NC(=O)C([NH2+]C)CC(C)C)C(O)c(c1)cc2)CC(=O)N)C(=O)NC1c2cc(-c5c(cc(O)cc5O)C(NC(=O)C(NC1=O)C(O)c1cc(Cl)c(Oc(c4)c3OC3OC(CO)C(O)C(O)C3OC3OC(C)C(O)C([NH3+])(C3)C)cc1)C(=O)[O-])c(O)cc2	Vancocin;VANCOMYCIN;Vancomicina;Vancomycine;Vancomycinum;Vancoled;Vancomycine [INN-French];Vancomycinum [INN-Latin];Vancomicina [INN-Spanish];CHEBI:28001;HSDB 3262;EINECS 215-772-6;Vancomycin HCL;VANCOR;Vancocin HCL;1404-90-6;Prestwick0_000497;Prestwick1_000497;Prestwick2_000497;AC1L24VU;AC1Q29OH;UNII-6Q205EH1VU;Lopac0_001267;Vancomycin [USAN:INN:BAN];SPBio_002314;CHEMBL262777;C66H75Cl2N9O24;1404…	Applicant(s): UNIV WASHINGTON [US], NOVARTIS VACCINES & DIAGNOSTIC [US];Natural Product;Applicant(s): BIOTICA TECH LTD [GB];"<a href=""http://worldwide.espacenet.com/publicationDetails/biblio?FT=D&CC=EP&NR=2305662A1&KC=A1"">Alkoxylated glycerol acetals and their derivatives</a>";Hits: Claims(2), Description(2);Mechanism of action: The bactericidal action of vancomycin results primarily from inhib…	Pharmacologic Actions;Chemical Actions and Uses;Anti-Bacterial Agents;Anti-Infective Agents;Therapeutic Uses
206	Antibacterial	DB00626	6714010	Bacitracin	Peptide	Peptide	Cell wall	InChI=1S/C66H103N17O16S/c1-9-35(6)52(69)66-81-48(32-100-66)63(97)76-43(26-34(4)5)59(93)74-42(22-23-50(85)86)58(92)83-53(36(7)10-2)64(98)75-40-20-15-16-25-71-55(89)46(29-49(68)84)78-62(96)47(30-51(87)88)79-61(95)45(28-39-31-70-33-72-39)77-60(94)44(27-38-18-13-12-14-19-38)80-65(99)54(37(8)11-3)82-57(91)41(21-17-24-67)73-56(40)90/h12-14,18-19,31,33-37,40-48,52-54H,9-11,15-17,20-30,32,67,69H2,1-8H3,(…	CLKOFPXJLQSYAH-RNHDWVCBSA-N	(4R)-4-[[(2S)-2-[[2-(1-amino-2-methylbutyl)-4,5-dihydro-1,3-thiazole-4-carbonyl]amino]-4-methylpentanoyl]amino]-5-[[(2S,3S)-1-[[(3S,6R,9S,12R,15S,18R,21S)-3-(2-amino-2-oxoethyl)-18-(3-aminopropyl)-12-benzyl-15-[(2S)-butan-2-yl]-6-(carboxymethyl)-9-(1H-imidazol-5-ylmethyl)-2,5,8,11,14,17,20-heptaoxo-1,4,7,10,13,16,19-heptazacyclopentacos-21-yl]amino]-3-methyl-1-oxopentan-2-yl]amino]-5-oxopentanoic…	C66H103N17O16S	15	14	35	3	5	4	-5.78066	539.77	17	16	1422.72	S1CC(N=C1C([NH3+])C(CC)C)C(=O)NC(CC(C)C)C(=O)NC(CCC(=O)[O-])C(=O)NC(C(CC)C)C(=O)NC1CCCCNC(=O)C(NC(=O)C(NC(=O)C(NC(=O)C(NC(=O)C(NC(=O)C(NC1=O)CCC[NH3+])C(CC)C)Cc1ccccc1)Cc1[nH]cnc1)CC(=O)[O-])CC(=O)N	bacitracin;Topitracin;Zutracin;Bacitracin A;Bacitracina;Bacitracine;Bacitracinum;Prestwick1_000919;Prestwick2_000919;Prestwick3_000919;AC1O8Q0J;BSPBio_000798;MLS002695992;B0125_SIGMA;SPBio_002987;46084_RIEDEL;BPBio1_000878;11702_FLUKA;11702_SIGMA;HMS1570H20;HMS2097H20;SMR001562136;AB00513964;(4R)-4-[[(2S)-2-[[2-(1-amino-2-methylbutyl)-4,5-dihydro-1,3-thiazole-4-carbonyl]amino]-4-methylpentanoyl]a…	http://mlsmr.evotec.com/MLSMR_HomePage/pdf/pubchem_reference.pdf;(4R)-4-[[(2S)-2-[[2-(1-azanyl-2-methyl-butyl)-4,5-dihydro-1,3-thiazol-4-yl]carbonylamino]-4-methyl-pentanoyl]amino]-5-[[(2S,3S)-1-[[(3S,6R,9S,12R,15S,18R,21S)-3-(2-azanyl-2-oxidanylidene-ethyl)-18-(3-azanylpropyl)-15-[(2S)-butan-2-yl]-6-(carboxymethyl)-9-(1H-imidazol-5-ylmethyl)-2,5,8,11,14,17,20-heptakis(oxidanylidene)-12-(phenylme…	Anti-Infective Agents, Local;Pharmacologic Actions;Therapeutic Uses;Chemical Actions and Uses;Anti-Bacterial Agents;Anti-Infective Agents
207	Antibacterial	DB01111	216258	Colistimethate	Peptide	Peptide	Cell wall	InChI=1S/C58H110N16O28S5.5Na/c1-9-35(6)12-10-11-13-46(77)65-38(14-20-59-28-103(88,89)90)53(82)74-48(37(8)76)58(87)70-41(17-23-62-31-106(97,98)99)50(79)68-43-19-25-64-57(86)47(36(7)75)73-54(83)42(18-24-63-32-107(100,101)102)67-49(78)39(15-21-60-29-104(91,92)93)69-55(84)44(26-33(2)3)72-56(85)45(27-34(4)5)71-52(81)40(66-51(43)80)16-22-61-30-105(94,95)96;;;;;/h33-45,47-48,59-63,75-76H,9-32H2,1-8H3,(H…	IQWHCHZFYPIVRV-UHFFFAOYSA-I	pentasodium [2-[17-(1-hydroxyethyl)-22-[[2-[[3-hydroxy-2-[[2-(6-methyloctanoylamino)-4-(sulfonatomethylamino)butanoyl]amino]butanoyl]amino]-4-(sulfonatomethylamino)butanoyl]amino]-5,8-bis(2-methylpropyl)-3,6,9,12,15,18,23-heptaoxo-11,14-bis[2-(sulfonatomethylamino)ethyl]-1,4,7,10,13,16,19-heptazacyclotricos-2-yl]ethylamino]methanesulfonate	C58H105N16Na5O28S5	13	13	48	3	5	1	-14.9044	699.66	16	28	1639.93	S(=O)(=O)([O-])C[NH2+]CCC1NC(=O)C(NC(=O)C(NC(=O)C(NC(=O)C(NC(=O)C(NC(=O)C(NC(=O)C(NC(=O)C(NC(=O)CCCCC(CC)C)CC[NH2+]CS(=O)(=O)[O-])C(O)C)CC[NH2+]CS(=O)(=O)[O-])CCNC(=O)C(NC1=O)C(O)C)CC[NH2+]CS(=O)(=O)[O-])CC(C)C)CC(C)C)CC[NH2+]CS(=O)(=O)[O-]	Colistimethate sodium;Colimycin M;Colistimethate;Coly-Mycin M;Colistin sodium methanesulfonate;Sodium colistimethate;Colistrimethate sodium;Colymycin M;Colistin sulfomethate sodium;Colistin Sulfomethate;Coly-mycin injectable;Colimicina;Colimyscine;Sodium colistinemethanesulfonate;Sodium colistin methanesulfonate;Colistinemethanesulfonate sodique;Coly-Mycin M Parenteral;Pentasodium colistinmethane…	Drug / Therapeutic Agent;Human Data;Depositor-supplied synonyms are taken from MeSH (Medical Subject Headings).;Indication: For the treatment of acute or chronic infections due to sensitive strains of certain gram-negative bacilli, particularly Pseudomonas aeruginosa.;on human health by curating chemical-gene/protein interactions and chemical- and gene-disease relationships from;The Comparative T…
208	Antibacterial	DB06149	23106672	Teicoplanin	Peptide	Peptide	Cell wall	InChI=1S/C18H18N4O/c1-22(2)17-9-3-14(4-10-17)11-20-21-16-7-5-15(6-8-16)18-12-19-13-23-18/h3-13,21H,1-2H3/b20-11+	LOGXNKAMNWTYNU-RGVLZGJSSA-N	N,N-dimethyl-4-[(E)-[[4-(1,3-oxazol-5-yl)phenyl]hydrazinylidene]methyl]aniline	C18H18N4O	2	1	5	0	0	3	3.8536	53.66	4	1	306.369	o1cncc1-c1ccc(NN=Cc2ccc(N(C)C)cc2)cc1
209	Antibacterial		16129635	Tyrocidine	Peptide	Peptide	Cell wall	InChI=1S/C66H87N13O13/c1-38(2)32-47-59(85)77-52(36-42-20-12-7-13-21-42)66(92)79-31-15-23-53(79)64(90)76-49(34-41-18-10-6-11-19-41)61(87)74-48(33-40-16-8-5-9-17-40)60(86)75-51(37-55(69)82)62(88)70-46(28-29-54(68)81)58(84)73-50(35-43-24-26-44(80)27-25-43)63(89)78-56(39(3)4)65(91)71-45(22-14-30-67)57(83)72-47/h5-13,16-21,24-27,38-39,45-53,56,80H,14-15,22-23,28-37,67H2,1-4H3,(H2,68,81)(H2,69,82)(H,70…	GSXRBRIWJGAPDU-BBVRJQLQSA-N	3-[(3R,6S,9S,12S,15S,18S,21S,24R,27S,30S)-21-(2-amino-2-oxoethyl)-9-(3-aminopropyl)-3,24,27-tribenzyl-15-[(4-hydroxyphenyl)methyl]-6-(2-methylpropyl)-2,5,8,11,14,17,20,23,26,29-decaoxo-12-propan-2-yl-1,4,7,10,13,16,19,22,25,28-decazabicyclo[28.3.0]tritriacontan-18-yl]propanamide	C66H87N13O13	13	12	19	3	5	6	-1.10442	416.26	13	13	1271.51	Oc1ccc(cc1)CC1NC(=O)C(NC(=O)C(NC(=O)C(NC(=O)C(NC(=O)C2N(CCC2)C(=O)C(NC(=O)C(NC(=O)C(NC(=O)C(NC1=O)C(C)C)CCC[NH3+])CC(C)C)Cc1ccccc1)Cc1ccccc1)Cc1ccccc1)CC(=O)N)CCC(=O)N	Anti-Infective Agents, Local;Pharmacologic Actions;Chemical Actions and Uses;Therapeutic Uses;Anti-Bacterial Agents;Anti-Infective Agents	Tyrocidine;EINECS 232-375-3;8011-61-8;CHEMBL408504;2C4H10;LS-177531;C12041	Anti-Infective Agents, Local;Anti-Bacterial Agents;Anti-Infective Agents
210	Antibacterial		16129632	Oritavancin	Peptide	Peptide	Cell wall	InChI=1S/C86H97Cl3N10O26/c1-35(2)22-51(92-7)77(110)98-67-69(105)42-15-20-55(49(88)24-42)120-57-26-44-27-58(73(57)125-84-74(71(107)70(106)59(34-100)122-84)124-62-32-86(6,76(109)37(4)119-62)93-33-38-8-10-39(11-9-38)40-12-17-45(87)18-13-40)121-56-21-16-43(25-50(56)89)72(123-61-31-85(5,91)75(108)36(3)118-61)68-82(115)97-66(83(116)117)48-28-46(101)29-54(103)63(48)47-23-41(14-19-53(47)102)64(79(112)99-…	VHFGEBVPHAGQPI-MYYQHNLBSA-N		C86H97Cl3N10O26	22	16	20	3	5	13	1.1352	574.59	10	26	1795.14	Clc1c2Oc3cc4C(NC(=O)C(NC(=O)C(NC(=O)C([NH2+]C)CC(C)C)C(O)c(c1)cc2)CC(=O)N)C(=O)NC1c2cc(-c5c(cc(O)cc5O)C(NC(=O)C(NC1=O)C(OC1OC(C)C(O)C([NH3+])(C1)C)c1cc(Cl)c(Oc(c4)c3OC3OC(CO)C(O)C(O)C3OC3OC(C)C(O)C([NH2+]Cc4ccc(cc4)-c4ccc(Cl)cc4)(C3)C)cc1)C(=O)[O-])c(O)cc2	Nuvocid;Oritavancin;Oritavancin [INN];LY333328;(3S,6R,7R,22R,23S,26S,36R,38aR)-22-(3-Amino-2,3,6-trideoxy-3-C-methyl-alpha-L-mannopyranosyloxy)-3-(carbamoylmethyl)-10,19-dichloro-44-[2-O-[3-(4'-chlorobiphenyl-4-ylmethylamino)-2,3,6-trideoxy-3-C-me;(4''R)-22-O-(3-Amino-2,3,6-trideoxy-3-C-methyl-alpha-L-arabino-hexopyranosyl)-N3''-(4'-chloro[1,1'-biphenyl]-4-ylmethyl)vancomycin;LY-333328;Chlorobiph…	ANTIBIOTICS, GLYCOPEPTIDS;Biphenyls;Mycins;NIAID ChemDB HIV, Opportunistic Infections and Tuberculosis Therapeutics Database
211	Antibacterial		16132338	Ramoplanin	Peptide	Peptide	Cell wall	InChI=1S/C106H170ClN21O30/c1-8-9-10-11-15-22-80(140)114-75(50-78(110)138)96(147)118-76(51-79(111)139)97(148)124-86(60-25-36-66(133)37-26-60)102(153)117-72(21-17-46-109)92(143)120-83(56(6)130)100(151)126-89(63-31-42-69(136)43-32-63)105(156)127-88(62-29-40-68(135)41-30-62)104(155)121-82(55(5)129)99(150)119-74(48-58-18-13-12-14-19-58)95(146)116-71(20-16-45-108)93(144)123-87(61-27-38-67(134)39-28-61)…	FSBZBQUUCNYWOK-YIOPJBSBSA-N	2-[[(2R)-2-[[(2S)-2-[[2-[[2-[[(2S,3S)-2-[[2-[[(2R)-5-amino-2-[[(2S)-2-[[(2S,3S)-2-[[(2R)-2-[[(2R)-2-[[(2R,3S)-2-[[(2R)-5-amino-2-[[(2R)-2-[[4-amino-2-[[(2S)-4-amino-2-[[(2Z,4Z)-octa-2,4-dienoyl]amino]-4-oxobutanoyl]amino]-4-oxobutanoyl]amino]-2-(4-hydroxycyclohexyl)acetyl]amino]pentanoyl]amino]-3-hydroxybutanoyl]amino]-2-(4-hydroxycyclohexyl)acetyl]amino]-2-(4-hydroxycyclohexyl)acetyl]amino]-3-hy…	C106H170ClN21O30	28	28	78	3	6	7	-8.70823	858.36	21	30	2255.1	ClC1CC(CCC1O)C(NC(=O)C(NC(=O)C(NC(=O)CNC(=O)C(NC(=O)C(NC(=O)C(NC(=O)C(NC(=O)C(NC(=O)C(NC(=O)C(NC(=O)C(NC(=O)C(NC(=O)C(NC(=O)C(NC(=O)C(NC(=O)C(NC(=O)C=CC=CCCC)CC(=O)N)CC(=O)N)C1CCC(O)CC1)CCC[NH3+])C(O)C)C1CCC(O)CC1)C1CCC(O)CC1)C(O)C)Cc1ccccc1)CCC[NH3+])C1CCC(O)CC1)C(O)C)C1CCC(O)CC1)CC(C)C)C)C(=O)[O-]	Chemical Actions and Uses;Anti-Bacterial Agents;Anti-Infective Agents;Therapeutic Uses;Pharmacologic Actions	Ramoplanin;Antibiotic A 16686;A 16686A;A 16686;76168-82-6;Antibiotic A 16686, 2-(((3alpha,5beta)-3-hydroxy-7,24-dioxocholan-24-yl)amino)-, (SP-4-2)-;Ramoplanin [USAN:INN];C112H142ClN21O35;MDL 62,198;LS-143274;Glycolipodepsi peptide antibiotic produced by actinoplanes species ATCC33076;Glycolipodepsi peptide antibiotic produced by actinoplanes species ATCC33076. Ramoplanin is a complex antibiotic …	Anti-Bacterial Agents;Anti-Infective Agents;Drug / Therapeutic Agent
212	Antibacterial		23724878	Dalbavancin	Peptide	Peptide	Cell wall	InChI=1S/C88H100Cl2N10O28/c1-38(2)13-10-8-6-7-9-11-14-61(106)94-70-73(109)75(111)78(86(120)121)128-87(70)127-77-58-31-43-32-59(77)124-55-24-19-42(29-50(55)89)71(107)69-85(119)98-67(80(114)92-25-12-26-100(4)5)48-33-44(102)34-57(125-88-76(112)74(110)72(108)60(37-101)126-88)62(48)47-28-40(17-22-52(47)103)65(82(116)99-69)95-83(117)66(43)96-84(118)68-49-35-46(36-54(105)63(49)90)123-56-30-41(18-23-53(5…	KGPGQDLTDHGEGT-VBZOGQDBSA-N		C88H100Cl2N10O28	23	19	24	3	5	13	0.96297	581.12	10	28	1817.72	Clc1c2C3NC(=O)C(NC(=O)C([NH2+]C)c4cc(Oc(cc1O)c2)c(O)cc4)Cc1ccc(Oc2cc4C(NC3=O)C(=O)NC3c5cc(-c6c(cc(O)cc6OC6OC(CO)C(O)C(O)C6O)C(NC(=O)C(NC3=O)C(O)c3cc(Cl)c(Oc(c4)c2OC2OC(C(=O)[O-])C(O)C(O)C2NC(=O)CCCCCCCCC(C)C)cc3)C(=O)NCCC[NH+](C)C)c(O)cc5)cc1		Zeven (TN);Dalbavancin (USAN/INN);D03640;Zeven;DCL000512	Activity: Antibiotic;ATC code: J01XA04;Target: cell wall synthesis inhibitor
213	Antibacterial		3081362	Telavancin	Peptide	Peptide	Cell wall	InChI=1S/C80H106Cl2N11O27P/c1-7-8-9-10-11-12-13-14-21-85-22-23-87-80(5)32-57(115-37(4)71(80)103)119-70-68(102)67(101)55(34-94)118-79(70)120-69-53-28-41-29-54(69)117-52-20-17-40(27-46(52)82)65(99)63-77(109)91-61(78(110)111)43-30-50(96)44(33-86-35-121(112,113)114)66(100)58(43)42-25-38(15-18-49(42)95)59(74(106)93-63)90-75(107)60(41)89-73(105)48(31-56(83)97)88-76(108)62(92-72(104)47(84-6)24-36(2)3)64…	ONUMZHGUFYIKPM-MXNFEBESSA-N		C80H106Cl2N11O27P	20	16	31	3	6	10	-4.3376	612.92	11	27	1756.67	Clc1c2Oc3cc4C(NC(=O)C(NC(=O)C(NC(=O)C([NH2+]C)CC(C)C)C(O)c(c1)cc2)CC(=O)N)C(=O)NC1c2cc(-c5c(cc(O)c(C[NH2+]CP(=O)([O-])[O-])c5O)C(NC(=O)C(NC1=O)C(O)c1cc(Cl)c(Oc(c4)c3OC3OC(CO)C(O)C(O)C3OC3OC(C)C(O)C([NH2+]CC[NH2+]CCCCCCCCCC)(C3)C)cc1)C(=O)[O-])c(O)cc2	Telavancin;Telavancin [INN];AC1MIWRX;TD-6424;UNII-XK134822Z0;DNC001420;LS-192933;Vancomycin, N3''-(2-(decylamino)ethyl)-29-(((phosphonomethyl)amino)methyl)-;372151-71-8
214	Antibacterial	DB00290	456190	Bleomycin	Peptide	Peptide	Nucleic Acid	InChI=1S/C55H83N17O21S3/c1-20-33(69-46(72-44(20)58)25(12-31(57)76)64-13-24(56)45(59)82)50(86)71-35(41(26-14-61-19-65-26)91-54-43(39(80)37(78)29(15-73)90-54)92-53-40(81)42(93-55(60)88)38(79)30(16-74)89-53)51(87)66-22(3)36(77)21(2)47(83)70-34(23(4)75)49(85)63-10-8-32-67-28(18-94-32)52-68-27(17-95-52)48(84)62-9-7-11-96(5)6/h14,17-19,21-25,29-30,34-43,53-54,64,73-75,77-81H,7-13,15-16,56H2,1-6H3,(H13-…	OYVAGSVQBOHSSS-QRQYLRPSSA-O	3-[[2-[2-[2-[[(2S,3R)-2-[[(2S,3S,4R)-4-[[(2S)-2-[[6-amino-2-[(1S)-3-amino-1-[[(2S)-2,3-diamino-3-oxopropyl]amino]-3-oxopropyl]-5-methylpyrimidine-4-carbonyl]amino]-3-[(2R,3S,4S,5S,6S)-3-[(2R,3S,4S,5R,6R)-4-carbamoyloxy-3,5-dihydroxy-6-(hydroxymethyl)oxan-2-yl]oxy-4,5-dihydroxy-6-(hydroxymethyl)oxan-2-yl]oxy-3-(1H-imidazol-5-yl)propanoyl]amino]-3-hydroxy-2-methylpentanoyl]amino]-3-hydroxybutanoyl]…	C55H84N17O21S3+	26	19	41	3	6	6	-9.25561	633.27	17	21	1417.59	[S+](CCCNC(=O)c1nc(sc1)-c1nc(sc1)CCNC(=O)C(NC(=O)C(C(O)C(NC(=O)C(NC(=O)c1nc(nc(N)c1C)C([NH2+]CC([NH3+])C(=O)N)CC(=O)N)C(OC1OC(CO)C(O)C(O)C1OC1OC(CO)C(O)C(OC(=O)N)C1O)c1[nH]cnc1)C)C)C(O)C)(C)C	Angiogenesis Inhibitors;Angiogenesis Modulating Agents;Antineoplastic Agents;Growth Inhibitors;Pharmacologic Actions;Chemical Actions and Uses;Antibiotics, Antineoplastic;Growth Substances;Physiological Effects of Drugs;Therapeutic Uses	bleomycin;Bleocin;Bleogin;bleomycin a2;Bleomycin A2 & Bleomycin B2.;Pingyangmyvin A2;Zhengguangmycin A2;Blenoxane;AC1L9UFF;STOCK1N-74760;NSC125066;11056-06-7;3-[[2-[2-[2-[[(2S,3R)-2-[[(2S,3S,4R)-4-[[(2S)-2-[[6-amino-2-[(1S)-3-amino-1-[[(2S)-2,3-diamino-3-oxopropyl]amino]-3-oxopropyl]-5-methylpyrimidine-4-carbonyl]amino]-3-[(2R,3S,4S,5S,6S)-3-[(2R,3S,4S,5R,6R)-4-carbamoyloxy-3,5-dihydroxy-6-(hydro…	3-[[2-[2-[2-[[(2S,3R)-2-[[(2S,3S,4R)-4-[[(2S)-3-[(2R,3S,4S,5S,6S)-3-[(2R,3S,4S,5R,6R)-4-aminocarbonyloxy-6-(hydroxymethyl)-3,5-bis(oxidanyl)oxan-2-yl]oxy-6-(hydroxymethyl)-4,5-bis(oxidanyl)oxan-2-yl]oxy-2-[[6-azanyl-2-[(1S)-3-azanyl-1-[[(2S)-2,3-bis(azanyl)-3-oxidanylidene-propyl]amino]-3-oxidanylidene-propyl]-5-methyl-pyrimidin-4-yl]carbonylamino]-3-(1H-imidazol-5-yl)propanoyl]amino]-2-methyl-3-…
215	Antibacterial	DB00970	2019	Dactinomycin	Peptide	Peptide	Nucleic Acid	InChI=1S/C62H86N12O16/c1-27(2)42-59(84)73-23-17-19-36(73)57(82)69(13)25-38(75)71(15)48(29(5)6)61(86)88-33(11)44(55(80)65-42)67-53(78)35-22-21-31(9)51-46(35)64-47-40(41(63)50(77)32(10)52(47)90-51)54(79)68-45-34(12)89-62(87)49(30(7)8)72(16)39(76)26-70(14)58(83)37-20-18-24-74(37)60(85)43(28(3)4)66-56(45)81/h21-22,27-30,33-34,36-37,42-45,48-49H,17-20,23-26,63H2,1-16H3,(H,65,80)(H,66,81)(H,67,78)(H,68…	RJURFGZVJUQBHK-UHFFFAOYSA-N	2-amino-4,6-dimethyl-3-oxo-1-N,9-N-bis[7,11,14-trimethyl-2,5,9,12,15-pentaoxo-3,10-di(propan-2-yl)-8-oxa-1,4,11,14-tetrazabicyclo[14.3.0]nonadecan-6-yl]phenoxazine-1,9-dicarboxamide	C62H86N12O16	14	5	10	3	5	7	0.14962	355.54	12	16	1255.44	O1C(C)C(NC(=O)C=2C3=Nc4c(OC3=C(C)C(=O)C=2N)c(ccc4C(=O)NC2C(OC(=O)C(N(C)C(=O)CN(C)C(=O)C3N(CCC3)C(=O)C(NC2=O)C(C)C)C(C)C)C)C)C(=O)NC(C(C)C)C(=O)N2C(CCC2)C(=O)N(CC(=O)N(C)C(C(C)C)C1=O)C	Therapeutic Uses;Anti-Bacterial Agents;Anti-Infective Agents;Antibiotics, Antineoplastic;Nucleic Acid Synthesis Inhibitors;Pharmacologic Actions;Protein Synthesis Inhibitors;Antineoplastic Agents;Chemical Actions and Uses;Enzyme Inhibitors;Molecular Mechanisms of Pharmacological Action	actinomycin D;Actinomycin Aiv;Actinomycin I;Dactinomycin D;Oncostatin K;Actinomycin IV;Chounghwamycin B;Actinomycin 7;Actinomycin C1;Actinomycin I1;Meractinomycin;Cosmegen;Lyovac cosmegen;Actinomycin X 1;Actinomycin A IV;Acto-D;Actinomycin 11 cosmegen;Dilactone actinomycin D acid;Dactinomicina;Dactinomycine;Dactinomycinum;Dilactone actinomycindioic D acid;Actinomycin C(sub1);Actinomycin I(sub 1);…	Enzyme Inhibitors;Groups: approved;Tumor data;Nucleic acid synthesis inhibitors;ATC code: L01DA01;Skin / Eye Irritant;2-azanyl-4,6-dimethyl-3-oxidanylidene-N1,N9-bis[7,11,14-trimethyl-2,5,9,12,15-pentakis(oxidanylidene)-3,10-di(propan-2-yl)-8-oxa-1,4,11,14-tetrazabicyclo[14.3.0]nonadecan-6-yl]phenoxazine-1,9-dicarboxamide;Structure Evaluation:Consistent with Molecular Formula.;Human Data;Activity…
216	Antibacterial		149025	Netropsin	Peptide	Peptide	Nucleic Acid	InChI=1S/C18H26N10O3.ClH/c1-27-9-11(6-12(27)16(30)23-4-3-15(20)29)26-17(31)13-5-10(8-28(13)2)25-14(19)7-24-18(21)22;/h5-6,8-9H,3-4,7H2,1-2H3,(H2,19,25)(H2,20,29)(H,23,30)(H,26,31)(H4,21,22,24);1H	QZOOZUGORDEYCC-UHFFFAOYSA-N	4-[[4-[[1-amino-2-(diaminomethylideneamino)ethylidene]amino]-1-methylpyrrole-2-carbonyl]amino]-N-(3-amino-3-oxopropyl)-1-methylpyrrole-2-carboxamide hydrochloride	C18H27ClN10O3	3	3	11	2	3	2	-4.6372	217.15	10	3	432.489	O=C(Nc1cc(n(c1)C)C(=O)NCCC(=O)N)c1n(cc([NH+]=C(N)C[NH+]=C(N)N)c1)C	Anti-Bacterial Agents;Pharmacologic Actions;Chemical Actions and Uses;Therapeutic Uses;Antiviral Agents;Anti-Infective Agents	Netropsin hydrochloride;Congocidine dihydrochloride;N,4'-Bi(Pyrrole-2-carboxamide), N'-(2-carbamoylethyl)-4-((2-guanidinoacetimidoyl)amino)-1,1'-dimethyl-, hydrochloride;AC1L3Y9W;1438-30-8 (Parent);LS-44663;4-[[4-[[1-amino-2-(diaminomethylideneamino)ethylidene]amino]-1-methylpyrrole-2-carbonyl]amino]-N-(3-amino-3-oxopropyl)-1-methylpyrrole-2-carboxamide hydrochloride	4-[[4-[[1-azanyl-2-[bis(azanyl)methylideneamino]ethylidene]amino]-1-methyl-pyrrol-2-yl]carbonylamino]-N-(3-azanyl-3-oxidanylidene-propyl)-1-methyl-pyrrole-2-carboxamide hydrochloride;Drug / Therapeutic Agent;Mutation data
217	Antibacterial		3197	Echinomycin	Peptide	Peptide	Nucleic Acid	InChI=1S/C51H64N12O12S2/c1-25(2)38-49(72)74-22-36(59-42(65)34-21-53-30-17-13-15-19-32(30)57-34)44(67)55-28(6)46(69)63(10)40-48(71)62(9)39(26(3)4)50(73)75-23-35(58-41(64)33-20-52-29-16-12-14-18-31(29)56-33)43(66)54-27(5)45(68)60(7)37(47(70)61(38)8)24-77-51(40)76-11/h12-21,25-28,35-40,51H,22-24H2,1-11H3,(H,54,66)(H,55,67)(H,58,64)(H,59,65)	AUJXLBOHYWTPFV-UHFFFAOYSA-N	N-[2,4,12,15,17,25-hexamethyl-29-methylsulfanyl-3,6,10,13,16,19,23,26-octaoxo-11,24-di(propan-2-yl)-7-(quinoxaline-2-carbonylamino)-9,22-dioxa-28-thia-2,5,12,15,18,25-hexazabicyclo[12.12.3]nonacosan-20-yl]quinoxaline-2-carboxamide	C51H64N12O12S2	14	4	9	2	3	6	0.6353	301.8	12	12	1101.28	S1CC2N(C)C(=O)C(NC(=O)C(NC(=O)c3nc4c(nc3)cccc4)COC(=O)C(N(C)C(=O)C(N(C)C(=O)C(NC(=O)C(NC(=O)c3nc4c(nc3)cccc4)COC(=O)C(N(C)C2=O)C(C)C)C)C1SC)C(C)C)C	Quinomycin A;Echinomycin;Levomycin;S-426-S (Lepetit);MLS002702903;SK 302B;NSC526417;NSC 526417;NSC-526417;BRN 0078671;Echinomycin A;Stereoisomer of N,N'-(2,4,12,15,17,25-hexamethyl-11,24-bis(1-methylethyl)-27-(methylthio)-3,6,10,13,16,19,23,26-octaoxo-9,22-dioxa-28-thia-2,5,12,15,18,25-hexaazabicyclo(12.12.3)nonacosane-7,20-diyl)bis(2-quinoxalinecarboxamide);512-64-1;GNF-PF-1958;Quinomycin A (7CI…	http://mlsmr.evotec.com/MLSMR_HomePage/pdf/pubchem_reference.pdf;Drug / Therapeutic Agent;N-[2,4,12,15,17,25-hexamethyl-29-methylsulfanyl-3,6,10,13,16,19,23,26-octakis(oxidanylidene)-11,24-di(propan-2-yl)-7-(quinoxalin-2-ylcarbonylamino)-9,22-dioxa-28-thia-2,5,12,15,18,25-hexazabicyclo[12.12.3]nonacosan-20-yl]quinoxaline-2-carboxamide;MLSMR_COMPOUND_CLASS: DC NP;Anti-Bacterial Agents;Antineoplast…	Antineoplastic Agents;Chemical Actions and Uses;Enzyme Inhibitors;Molecular Mechanisms of Pharmacological Action;Anti-Infective Agents;Therapeutic Uses;Anti-Bacterial Agents;Antibiotics, Antineoplastic;Nucleic Acid Synthesis Inhibitors;Pharmacologic Actions
218	Antibacterial		5351456	Sinanomycin	Peptide	Peptide	Nucleic Acid	InChI=1S/C18H26N10O3.ClH/c1-27-9-11(6-12(27)16(30)23-4-3-14(19)20)26-17(31)13-5-10(8-28(13)2)25-15(29)7-24-18(21)22;/h5-6,8-9H,3-4,7H2,1-2H3,(H3,19,20)(H,23,30)(H,25,29)(H,26,31)(H4,21,22,24);1H	FSOYOTWCAMRRGU-UHFFFAOYSA-N	N-[5-[(3-amino-3-iminopropyl)carbamoyl]-1-methylpyrrol-3-yl]-4-[[2-(diaminomethylideneamino)acetyl]amino]-1-methylpyrrole-2-carboxamide hydrochloride	C18H27ClN10O3	3	3	12	2	3	2	-4.137	214.78	10	3	432.489	O=C(Nc1cc(n(c1)C)C(=O)NCCC(=[NH2+])N)c1n(cc(NC(=O)C[NH+]=C(N)N)c1)C	Anti-Bacterial Agents;Anti-Infective Agents;Antiviral Agents;Pharmacologic Actions;Chemical Actions and Uses;Therapeutic Uses	NSC3067;Sinanomycin;NETROPSIN CHLORIDE;AC1NS0LC;ANTIBIOTIC 1A-887;CHEMBL553984;NSC-3067;DNC001009;LA 887;NSC275885;NSC-275885;18133-22-7;N-(3-amino-3-iminopropyl)-4-[[4-[[2-(diaminomethylideneamino)acetyl]amino]-1-methylpyrrole-2-carbonyl]amino]-1-methylpyrrole-2-carboxamide tetrahydrochloride;N-[5-[(3-amino-3-iminopropyl)carbamoyl]-1-methylpyrrol-3-yl]-4-[[2-(diaminomethylideneamino)acetyl]amino…	Deposition record created from database Chemistry on host DrZZLaptop on Oct 30, 2011;DTP/NCI DIS cdk 1.4.4. Release-October 2011.;N-[5-[(3-azanyl-3-azanylidene-propyl)carbamoyl]-1-methyl-pyrrol-3-yl]-4-[2-[bis(azanyl)methylideneamino]ethanoylamino]-1-methyl-pyrrole-2-carboxamide hydrochloride;Structure Evaluation:Consistent with Molecular Formula.
219	Antibacterial	DB00027	16130140	Gramicidin D	Peptide	Peptide	Permeability	InChI=1S/C99H140N20O17/c1-51(2)37-73(109-86(123)59(17)107-81(122)49-105-96(133)82(55(9)10)106-50-121)89(126)108-60(18)87(124)117-84(57(13)14)98(135)119-85(58(15)16)99(136)118-83(56(11)12)97(134)116-80(44-64-48-104-72-34-26-22-30-68(64)72)95(132)112-76(40-54(7)8)92(129)115-79(43-63-47-103-71-33-25-21-29-67(63)71)94(131)111-75(39-53(5)6)91(128)114-78(42-62-46-102-70-32-24-20-28-66(62)70)93(130)110-…	ZWCXYZRRTRDGQE-SORVKSEFSA-N		C99H140N20O17	17	21	68	3	5	8	4.37218	548.99	20	17	1882.33	OCCNC(=O)C(NC(=O)C(NC(=O)C(NC(=O)C(NC(=O)C(NC(=O)C(NC(=O)C(NC(=O)C(NC(=O)C(NC(=O)C(NC(=O)C(NC(=O)C(NC(=O)C(NC(=O)CNC(=O)C(NC=O)C(C)C)C)CC(C)C)C)C(C)C)C(C)C)C(C)C)Cc1c2c([nH]c1)cccc2)CC(C)C)Cc1c2c([nH]c1)cccc2)CC(C)C)Cc1c2c([nH]c1)cccc2)CC(C)C)Cc1c2c([nH]c1)cccc2	Anti-Infective Agents, Local;Pharmacologic Actions;Therapeutic Uses;Anti-Bacterial Agents;Anti-Infective Agents;Chemical Actions and Uses	GRAMICIDIN;Gramicidina;Gramicidine;Gramicidinum;Gramicidine [INN-French];Gramicidinum [INN-Latin];Gramicidina [INN-Spanish];Neo-Polycin;EINECS 215-790-4;1405-97-6;Gramicidin J;Gramicidina D;nchembio.145-comp39;UNII-5IE62321P4;CID73357;EINECS 215-738-0;DAP001327;NSC183503;60976-67-2;HCO-Val-Gly-D-Leu-Ala-D-Val-Val-D-Val-[Trp-D-Leu]3-Trp-NH2-CH2CH2OH;1393-88-0	Anti-Bacterial Agents;Anti-Infective Agents;Anti-infective agents, local;Drug / Therapeutic Agent;Mutation data;Natural Product;Natural Products, Microbial;NIAID ChemDB HIV, Opportunistic Infections and Tuberculosis Therapeutics Database;Peptides;STRUCTURE OF DOMINANT SPECIES. A LINEAR POLYPEPTIDE ANTIBIOTIC..(MIXTURE OF GRAMICIDIN A, B ,C AND D); ISOLATED FROM BACILLUS BREVIS
220	Antibacterial	DB00781	199402	Polymyxin B1	Peptide	Peptide	Permeability	InChI=1S/C56H98N16O13/c1-7-32(4)13-11-12-16-44(75)63-36(17-23-57)51(80)72-46(34(6)74)56(85)68-39(20-26-60)48(77)67-41-22-28-62-55(84)45(33(5)73)71-52(81)40(21-27-61)65-47(76)37(18-24-58)66-53(82)42(29-31(2)3)69-54(83)43(30-35-14-9-8-10-15-35)70-49(78)38(19-25-59)64-50(41)79/h8-10,14-15,31-34,36-43,45-46,73-74H,7,11-13,16-30,57-61H2,1-6H3,(H,62,84)(H,63,75)(H,64,79)(H,65,76)(H,66,82)(H,67,77)(H,68…	WQVJHHACXVLGBL-GOVYWFKWSA-N	(6R)-N-[(2S)-4-amino-1-[[(2S,3R)-1-[[(2S)-4-amino-1-oxo-1-[[(3S,6S,9S,12S,15R,18S,21S)-6,9,18-tris(2-aminoethyl)-15-benzyl-3-[(1R)-1-hydroxyethyl]-12-(2-methylpropyl)-2,5,8,11,14,17,20-heptaoxo-1,4,7,10,13,16,19-heptazacyclotricos-21-yl]amino]butan-2-yl]amino]-3-hydroxy-1-oxobutan-2-yl]amino]-1-oxobutan-2-yl]-6-methyloctanamide	C56H98N16O13	13	13	33	3	5	2	-8.82883	498.76	16	13	1208.54	O=C1NC(CC(C)C)C(=O)NC(CC[NH3+])C(=O)NC(CC[NH3+])C(=O)NC(C(O)C)C(=O)NCCC(NC(=O)C(NC(=O)C(NC(=O)C(NC(=O)CCCCC(CC)C)CC[NH3+])C(O)C)CC[NH3+])C(=O)NC(CC[NH3+])C(=O)NC1Cc1ccccc1		Polymyxin B(1);Polymyxin B1;BRN 0505906;polymyxin b;4135-11-9;UNII-B35S89JSRU;AC1L57B4;CHEBI:8309;LS-118120;(6R)-N-[(2S)-4-amino-1-[[(2S,3R)-1-[[(2S)-4-amino-1-oxo-1-[[(3S,6S,9S,12S,15R,18S,21S)-6,9,18-tris(2-aminoethyl)-15-benzyl-3-[(1R)-1-hydroxyethyl]-12-(2-methylpropyl)-2,5,8,11,14,17,20-heptaoxo-1,4,7,10,13,16,19-heptazacyclotricos-21-yl]amino]butan-2-yl]amino]-3-hydroxy-1-oxobutan-2-yl]amin…	(6R)-N-[(2S)-4-azanyl-1-[[(2S,3R)-1-[[(2S)-4-azanyl-1-oxidanylidene-1-[[(3S,6S,9S,12S,15R,18S,21S)-6,9,18-tris(2-azanylethyl)-12-(2-methylpropyl)-3-[(1R)-1-oxidanylethyl]-2,5,8,11,14,17,20-heptakis(oxidanylidene)-15-(phenylmethyl)-1,4,7,10,13,16,19-heptazacyclotricos-21-yl]amino]butan-2-yl]amino]-3-oxidanyl-1-oxidanylidene-butan-2-yl]amino]-1-oxidanylidene-butan-2-yl]-6-methyl-octanamide;Natural …
221	Antibacterial	DB00803	5311054	Colistin	Peptide	Peptide	Permeability	InChI=1S/C52H98N16O13/c1-9-29(6)11-10-12-40(71)59-32(13-19-53)47(76)68-42(31(8)70)52(81)64-35(16-22-56)44(73)63-37-18-24-58-51(80)41(30(7)69)67-48(77)36(17-23-57)61-43(72)33(14-20-54)62-49(78)38(25-27(2)3)66-50(79)39(26-28(4)5)65-45(74)34(15-21-55)60-46(37)75/h27-39,41-42,69-70H,9-26,53-57H2,1-8H3,(H,58,80)(H,59,71)(H,60,75)(H,61,72)(H,62,78)(H,63,73)(H,64,81)(H,65,74)(H,66,79)(H,67,77)(H,68,76)/…	YKQOSKADJPQZHB-QNPLFGSASA-N	N-[(2S)-4-amino-1-[[(2S,3R)-1-[[(2S)-4-amino-1-oxo-1-[[(3S,6S,9S,12S,15R,18S,21S)-6,9,18-tris(2-aminoethyl)-3-[(1R)-1-hydroxyethyl]-12,15-bis(2-methylpropyl)-2,5,8,11,14,17,20-heptaoxo-1,4,7,10,13,16,19-heptazacyclotricos-21-yl]amino]butan-2-yl]amino]-3-hydroxy-1-oxobutan-2-yl]amino]-1-oxobutan-2-yl]-5-methylheptanamide	C52H98N16O13	13	13	32	3	5	1	-9.4155	498.76	16	13	1160.49	O=C1NC(CC(C)C)C(=O)NC(CC[NH3+])C(=O)NC(CC[NH3+])C(=O)NC(C(O)C)C(=O)NCCC(NC(=O)C(NC(=O)C(NC(=O)C(NC(=O)CCCC(CC)C)CC[NH3+])C(O)C)CC[NH3+])C(=O)NC(CC[NH3+])C(=O)NC1CC(C)C	Pharmacologic Actions;Anti-Bacterial Agents;Anti-Infective Agents;Chemical Actions and Uses;Therapeutic Uses	colistin;Colistin sulphate;Coly-Mycin S;Polymyxin E. Sulfate;AC1NSJWT;Colistin sulfate, nonsterile;Polymyxin E;DB00803;N-[(2S)-4-amino-1-[[(2S,3R)-1-[[(2S)-4-amino-1-oxo-1-[[(3S,6S,9S,12S,15R,18S,21S)-6,9,18-tris(2-aminoethyl)-3-[(1R)-1-hydroxyethyl]-12,15-bis(2-methylpropyl)-2,5,8,11,14,17,20-heptaoxo-1,4,7,10,13,16,19-heptazacyclotricos-21-yl]amino]butan-2-yl]amino]-3-hydroxy-1-oxobutan-2-yl]am…	Groups: approved;Indication: For the treatment of acute or chronic infections due to sensitive strains of certain gram-negative bacilli, particularly Pseudomonas aeruginosa.;ISOLATED FROM BACILLUS COLISTINUS; MIXTURE OF COLISTIN A, B AND C; COLISTIN A SHOWN; OR DISULFATE SALT;Mechanism of action: Colistin is a surface active agent which penetrates into and disrupts the bacterial cell membrane. Co…
222	Antibacterial		197072	Mattacin	Peptide	Peptide	Permeability	InChI=1S/C51H96N16O14/c1-8-27(4)11-9-10-12-38(71)58-31(13-19-52)46(76)66-40(29(6)69)50(80)63-34(16-22-55)43(73)61-36-18-24-57-49(79)39(28(5)68)65-47(77)35(17-23-56)60-42(72)33(15-21-54)62-51(81)41(30(7)70)67-48(78)37(25-26(2)3)64-44(74)32(14-20-53)59-45(36)75/h26-37,39-41,68-70H,8-25,52-56H2,1-7H3,(H,57,79)(H,58,71)(H,59,75)(H,60,72)(H,61,73)(H,62,81)(H,63,80)(H,64,74)(H,65,77)(H,66,76)(H,67,78)/…	XRBFWBMDMQIAQF-ZHFMXAAZSA-N	N-[(2S)-4-amino-1-[[(2S,3R)-1-[[(2S)-4-amino-1-oxo-1-[[(3S,6S,9S,12S,15R,18S,21S)-6,9,18-tris(2-aminoethyl)-3,12-bis[(1R)-1-hydroxyethyl]-15-(2-methylpropyl)-2,5,8,11,14,17,20-heptaoxo-1,4,7,10,13,16,19-heptazacyclotricos-21-yl]amino]butan-2-yl]amino]-3-hydroxy-1-oxobutan-2-yl]amino]-1-oxobutan-2-yl]-6-methyloctanamide	C51H96N16O14	14	14	32	3	5	1	-10.6907	518.99	16	14	1162.47	O=C1NC(CC[NH3+])C(=O)NC(CC[NH3+])C(=O)NC(C(O)C)C(=O)NCCC(NC(=O)C(NC(=O)C(NC(=O)C(NC(=O)CCCCC(CC)C)CC[NH3+])C(O)C)CC[NH3+])C(=O)NC(CC[NH3+])C(=O)NC(CC(C)C)C(=O)NC1C(O)C	Chemical Actions and Uses;Therapeutic Uses;Pharmacologic Actions;Anti-Bacterial Agents;Anti-Infective Agents	Polymyxin M;Polymyxin E(sub 1), 7-L-theonine-;AC1L52TZ;LS-118142;6683-17-6;N-[(2S)-4-amino-1-[[(2S,3R)-1-[[(2S)-4-amino-1-oxo-1-[[(3S,6S,9S,12S,15R,18S,21S)-6,9,18-tris(2-aminoethyl)-3,12-bis[(1R)-1-hydroxyethyl]-15-(2-methylpropyl)-2,5,8,11,14,17,20-heptaoxo-1,4,7,10,13,16,19-heptazacyclotricos-21-yl]amino]butan-2-yl]amino]-3-hydroxy-1-oxobutan-2-yl]amino]-1-oxobutan-2-yl]-6-methyloctanamide	N-[(2S)-4-azanyl-1-[[(2S,3R)-1-[[(2S)-4-azanyl-1-oxidanylidene-1-[[(3S,6S,9S,12S,15R,18S,21S)-6,9,18-tris(2-azanylethyl)-15-(2-methylpropyl)-3,12-bis[(1R)-1-oxidanylethyl]-2,5,8,11,14,17,20-heptakis(oxidanylidene)-1,4,7,10,13,16,19-heptazacyclotricos-21-yl]amino]butan-2-yl]amino]-3-oxidanyl-1-oxidanylidene-butan-2-yl]amino]-1-oxidanylidene-butan-2-yl]-6-methyl-octanamide
223	Antibacterial		452550	Tyrothricin	Peptide	Peptide	Permeability	InChI=1S/C65H85N11O13/c1-38(2)32-49-60(84)74-52(36-42-20-12-7-13-21-42)65(89)76-31-15-23-53(76)63(87)73-51(34-41-18-10-6-11-19-41)61(85)70-47(33-40-16-8-5-9-17-40)57(81)48(37-54(67)78)71-59(83)46(28-29-55(79)80)68-50(35-43-24-26-44(77)27-25-43)62(86)75-56(39(3)4)64(88)69-45(22-14-30-66)58(82)72-49/h5-13,16-21,24-27,38-39,45-53,56,68,77H,14-15,22-23,28-37,66H2,1-4H3,(H2,67,78)(H,69,88)(H,70,85)(H,…	NLJVXZFCYKWXLH-DXTIXLATSA-N	3-[(3R,6S,9S,12S,15S,17S,20S,22R,25S,28S)-20-(2-amino-2-oxoethyl)-9-(3-aminopropyl)-3,22,25-tribenzyl-15-[(4-hydroxyphenyl)methyl]-6-(2-methylpropyl)-2,5,8,11,14,18,21,24,27-nonaoxo-12-propan-2-yl-1,4,7,10,13,16,19,23,26-nonazabicyclo[26.3.0]hentriacontan-17-yl]propanoic acid	C65H85N11O13	11	9	19	3	5	6	-1.93972	388.78	11	13	1229.47	Oc1ccc(cc1)CC1[NH2+]C(CCC(=O)[O-])C(=O)NC(CC(=O)N)C(=O)C(NC(=O)C(NC(=O)C2N(CCC2)C(=O)C(NC(=O)C(NC(=O)C(NC(=O)C(NC1=O)C(C)C)CCC[NH3+])CC(C)C)Cc1ccccc1)Cc1ccccc1)Cc1ccccc1	tyrothricin;Bactratycin;Dermotricine;Coltirot;Martricin;Biothricin;Ginotricina;Hydrotricine;Pharothricetten;Rinotricina;Solutricine;Tirotricina;Tyrothricine;Tyrothricinum;Triciderm;Tyroderm;Tyrosur;Tyrozets;Tyrex;Dubos crude crystals;Intraderm tyrothricin;Caswell No. 900A;Tyri 10;Tirotricina [INN-Spanish];Tyrothricine [INN-French];Tyrothricinum [INN-Latin];EINECS 215-771-0;EPA Pesticide Chemical …	Anti-Bacterial Agents;Drug / Therapeutic Agent;TYROCIDINE A DRAWN; MIXTURE OF GRAMICIDIN A (10%-20%) AND TYROCIDINE A (40%-60%); ISOLATED FROM SOIL BACTERIA I.E. BACILLUS BREVIS;Anti-infective agents, local;3-[(3R,6S,9S,12S,15S,17S,20S,22R,25S,28S)-20-(2-azanyl-2-oxidanylidene-ethyl)-9-(3-azanylpropyl)-15-[(4-hydroxyphenyl)methyl]-6-(2-methylpropyl)-2,5,8,11,14,18,21,24,27-nonakis(oxidanylidene)-…	Anti-Bacterial Agents;Anti-Infective Agents;Anti-Infective Agents, Local;Chemical Actions and Uses;Pharmacologic Actions;Therapeutic Uses
224	Antibacterial		3000706	Valinomycin	Peptide	Peptide	Permeability	InChI=1S/C54H90N6O18/c1-22(2)34-49(67)73-31(19)43(61)55-38(26(9)10)53(71)77-41(29(15)16)47(65)59-36(24(5)6)51(69)75-33(21)45(63)57-39(27(11)12)54(72)78-42(30(17)18)48(66)60-35(23(3)4)50(68)74-32(20)44(62)56-37(25(7)8)52(70)76-40(28(13)14)46(64)58-34/h22-42H,1-21H3,(H,55,61)(H,56,62)(H,57,63)(H,58,64)(H,59,65)(H,60,66)/t31-,32-,33-,34+,35+,36+,37-,38-,39-,40+,41+,42+/m0/s1	FCFNRCROJUBPLU-DNDCDFAISA-N	(3S,6S,9R,12R,15S,18S,21R,24R,27S,30S,33R,36R)-6,18,30-trimethyl-3,9,12,15,21,24,27,33,36-nona(propan-2-yl)-1,7,13,19,25,31-hexaoxa-4,10,16,22,28,34-hexazacyclohexatriacontane-2,5,8,11,14,17,20,23,26,29,32,35-dodecone	C54H90N6O18	12	6	9	3	4	1	2.3433	332.4	6	18	1111.34	O1C(C(C)C)C(=O)NC(C(C)C)C(OC(C)C(=O)NC(C(C)C)C(OC(C(C)C)C(=O)NC(C(C)C)C(OC(C)C(=O)NC(C(C)C)C(OC(C(C)C)C(=O)NC(C(C)C)C(OC(C)C(=O)NC(C(C)C)C1=O)=O)=O)=O)=O)=O	Anti-Bacterial Agents;Anti-Infective Agents;Ionophores;Membrane Transport Modulators;Specialty Uses of Chemicals;Chemical Actions and Uses;Molecular Mechanisms of Pharmacological Action;Therapeutic Uses;Pharmacologic Actions	valinomycin;NSC122023;2001-95-8;AC1MHDBQ;AmbotzLS-1079;(3S,6S,9R,12R,15S,18S,21R,24R,27S,30S,33R,36R)-6,18,30-trimethyl-3,9,12,15,21,24,27,33,36-nona(propan-2-yl)-1,7,13,19,25,31-hexaoxa-4,10,16,22,28,34-hexazacyclohexatriacontane-2,5,8,11,14,17,20,23,26,29,32,35-dodecone;Cyclic(D-.alpha.-hydroxyisovaleryl-D-valyl-L-lactoyl-L-valyl-D-.alpha.-hydroxyisovaleryl-D-valyl-L-lactoyl-L-valyl-D-.alpha.-h…	(3S,6S,9R,12R,15S,18S,21R,24R,27S,30S,33R,36R)-6,18,30-trimethyl-3,9,12,15,21,24,27,33,36-nona(propan-2-yl)-1,7,13,19,25,31-hexaoxa-4,10,16,22,28,34-hexazacyclohexatriacontane-2,5,8,11,14,17,20,23,26,29,32,35-dodecone;http://www.nature.com/naturechemicalbiology;Mycins;Nature Chemical Biology, doi: 10.1038/nchembio.284, published online 27 December 2009;NIAID ChemDB HIV, Opportunistic Infections a…
225	Antibacterial		443099	Bicozamycin	Peptide	Peptide	Protein	InChI=1S/C12H18N2O7/c1-6-3-4-21-12(7(16)10(2,19)5-15)9(18)13-11(6,20)8(17)14-12/h7,15-16,19-20H,1,3-5H2,2H3,(H,13,18)(H,14,17)/t7?,10?,11-,12+/m1/s1	WOUDXEYYJPOSNE-CJYLUKGNSA-N	(1R,6S)-1-hydroxy-2-methylidene-6-(1,2,3-trihydroxy-2-methylpropyl)-5-oxa-8,10-diazabicyclo[4.2.2]decane-7,9-dione	C12H18N2O7	7	6	3	1	2	2	-3.302	148.35	2	7	302.283	O1CCC(=C)C2(O)NC(=O)C1(NC2=O)C(O)C(O)(CO)C	Chemical Actions and Uses;Enzyme Inhibitors;Gastrointestinal Agents;Molecular Mechanisms of Pharmacological Action;Pharmacologic Actions;Therapeutic Uses;Anti-Bacterial Agents;Anti-Infective Agents;Antidiarrheals	Bicyclomycin;CGP-3543 currency;CHEMBL352043
226	Antibacterial	DB01256	6918462	Retapamulin	Pleuromutilin	Miscellaneous	50S Ribosome	InChI=1S/C30H47NO4S/c1-7-28(4)16-24(35-25(33)17-36-22-14-20-8-9-21(15-22)31(20)6)29(5)18(2)10-12-30(19(3)27(28)34)13-11-23(32)26(29)30/h7,18-22,24,26-27,34H,1,8-17H2,2-6H3/t18-,19+,20-,21+,22?,24-,26+,27+,28-,29+,30+/m1/s1	STZYTFJPGGDRJD-FJJJPKKESA-N		C30H47NO4S	3	1	6	1	2	5	3.8342	68.04	1	4	518.783	S(CC(OC1CC(C=C)(C)C(O)C(C23C(C1(C)C(CC2)C)C(=O)CC3)C)=O)C1CC2[NH+](C(C1)CC2)C		Altargo;Altabax (Glaxo);Retapamulin;Altabax;DB01256;Altabax (TN);SB 275833;Retapamulin (USAN/INN);UNII-4MG6O8991R;224452-66-8;SB-275833;CID6918462;D05720;CHEMBL1658;345632-67-9;DAP000886	Groups: approved;Indication: For use in adults and pediatric patients aged 9 months and older for the topical treatment of impetigo (up to 100 cm2 in total area in adults or 2% total body surface area in pediatric patients aged 9 months or older) due to Staphylococcus aureus (methicillin-susceptible isolates only) or Streptococcus pyogenes.;Mechanism of action: Retapamulin is a bacterial protein …
227	Antibacterial		127791	Valnemulin	Pleuromutilin	Miscellaneous	50S Ribosome	InChI=1S/C31H52N2O5S/c1-10-29(8)15-22(38-23(35)16-39-28(6,7)17-33-27(37)24(32)18(2)3)30(9)19(4)11-13-31(20(5)26(29)36)14-12-21(34)25(30)31/h10,18-20,22,24-26,36H,1,11-17,32H2,2-9H3,(H,33,37)/t19-,20+,22-,24-,25+,26+,29-,30?,31?/m1/s1	LLYYNOVSVPBRGV-FMWPFBIJSA-N		C31H52N2O5S	4	2	11	1	2	3	3.7874	120.34	2	5	565.84	S(C(CNC(=O)C([NH3+])C(C)C)(C)C)CC(OC1CC(C=C)(C)C(O)C(C23C(C1(C)C(CC2)C)C(=O)CC3)C)=O		Valnemulin;Valnemulin [INN];Econor;AC1L2SMW;UNII-2AHC415BQG;101312-92-9
228	Antibacterial		656958	Tiamulin	Pleuromutilin	Miscellaneous	50S Ribosome	InChI=1S/C28H47NO4S/c1-8-26(6)17-22(33-23(31)18-34-16-15-29(9-2)10-3)27(7)19(4)11-13-28(20(5)25(26)32)14-12-21(30)24(27)28/h8,19-20,22,24-25,32H,1,9-18H2,2-7H3/t19-,20+,22-,24+,25+,26-,27+,28+/m1/s1	UURAUHCOJAIIRQ-QGLSALSOSA-N		C28H47NO4S	3	1	10	0	2	3	3.5508	68.04	1	4	494.761	S(CC[NH+](CC)CC)CC(OC1CC(C=C)(C)C(O)C(C23C(C1(C)C(CC2)C)C(=O)CC3)C)=O	Chemical Actions and Uses;Therapeutic Uses;Anti-Bacterial Agents;Anti-Infective Agents;Pharmacologic Actions	Tiamulin;MUL;Tiamulin pamoate;Denagard (TN);AC1LCVRY;Tiamulin (USAN/INN);CHEMBL1234521;CHEBI:44137;55297-95-5;C12065;D06127;(4R,5S,6S,8R,9AR,10R)-5-HYDROXY-4,6,9,10-TETRAMETHYL-1-OXO-6-VINYLDECAHYDRO-3A,9-PROPANOCYCLOPENTA[8]ANNULEN-8-YL {[2-(DIETHYLAMINO)ETHYL]SULFANYL}ACETATE	Activity: Antibacterial [veterinary];Inhibition Of Peptide Bond Formation By Pleuromutilins: The Structure Of The 50s Ribosomal Subunit From Deinococcus Radiodurans In Complex With Tiamulin;Inhibition Of Peptide Bond Formation By Pleuromutilins: The Structure Of The 50s Ribosomal Subunit From Deinococcus Radiodurans In Complex With Tiamulin Tiamulin, Pleuromutilin, 50s Ribosome Mol_id: 1; Molecul…
229	Antibacterial		3086060	Azamulin	Pleuromutilin	Miscellaneous	50S Ribosome	InChI=1S/C24H38N4O4S/c1-6-22(4)11-16(32-17(30)12-33-21-26-20(25)27-28-21)23(5)13(2)7-9-24(14(3)19(22)31)10-8-15(29)18(23)24/h13-14,16,18-19,31H,6-12H2,1-5H3,(H3,25,26,27,28)/t13?,14-,16+,18-,19-,22+,23-,24-/m0/s1	FMHQJXGMLMSMLC-GUNZQCIYSA-N		C24H38N4O4S	6	4	6	0	1	4	3.6095	131.19	4	4	478.658	S(CC(OC1CC(CC)(C)C(O)C(C23C(C1(C)C(CC2)C)C(=O)CC3)C)=O)c1nc([nH]n1)N		Azamulin;Azamulinum;Azamulin [INN];AC1MJ5I7;UNII-875AQ866X1;((5-Amino-s-triazol-3-yl)thio)acetic acid, 8-ester with (3aS,4R,5S,6R,8R,9aR,10R)-6-ethyloctahydro-5,8-dihydroxy-4,6,9,10-tetramethyl-3a,9-propano-3aH-cyclopentacycloocten-1(4H)-one;(3aS,4R,5S,6R,8R,9R,9aR,10R)-6-Ethyldecahydro-5-hydroxy-4,6,9,10-tetramethyl-1-oxo-3a,9-propanocyclopentacycloocten-8-yl ((5-amino-1,2,4-triazol-3-yl)thio)ac…
230	Antibacterial	DB00218	152946	Moxifloxacin	Quinolone	Quinolone	Topoisomerase	InChI=1S/C21H24FN3O4/c1-29-20-17-13(19(26)14(21(27)28)9-25(17)12-4-5-12)7-15(22)18(20)24-8-11-3-2-6-23-16(11)10-24/h7,9,11-12,16,23H,2-6,8,10H2,1H3,(H,27,28)/t11-,16+/m0/s1	FABPRXSRWADJSP-MEDUHNTESA-N	7-[(4aS,7aS)-1,2,3,4,4a,5,7,7a-octahydropyrrolo[3,4-b]pyridin-6-yl]-1-cyclopropyl-6-fluoro-8-methoxy-4-oxoquinoline-3-carboxylic acid	C21H24FN3O4	2	0	4	0	1	5	-0.2048	89.52	3	4	401.438	Fc1cc2c(N(C=C(C(=O)[O-])C2=O)C2CC2)c(OC)c1N1CC2C([NH2+]CCC2)C1	Chemical Actions and Uses;Pharmacologic Actions;Therapeutic Uses;Anti-Infective Agents	moxifloxacin;Vigamox;Avelox;Avelox I.V.;MXFX;CHEMBL32;Moxifloxacin [INN:BAN];Actira (*Hydrochloride*);Avelox (*Hydrochloride*);AC1L49EP;UNII-U188XYD42P;CCRIS 8690;BAY 12-8039 (*Hydrochloride*);151096-09-2;DB00218;LS-141510;BAY 12-8039;1-Cyclopropyl-6-fluoro-1,4-dihydro-8-methoxy-7-((4aS,7aS)-octahydro-6H-pyrrolo(3,4-b)pyridin-6-yl)-4-oxo-3-quinolinecarboxylic acid;I06-1961;186826-86-8;(1'S,6'S)-1…	NIAID ChemDB HIV, Opportunistic Infections and Tuberculosis Therapeutics Database;Mechanism of action: The bactericidal action of moxifloxacin results from inhibition of the enzymes topoisomerase II (DNA gyrase) and topoisomerase IV. DNA gyrase is an essential enzyme that is involved in the replication, transcription and repair of bacterial DNA. Topoisomerase IV is an enzyme known to play a key r…
231	Antibacterial	DB00365	72474	Grepafloxacin	Quinolone	Quinolone	Topoisomerase	InChI=1S/C19H22FN3O3/c1-10-8-22(6-5-21-10)15-7-14-16(11(2)17(15)20)18(24)13(19(25)26)9-23(14)12-3-4-12/h7,9-10,12,21H,3-6,8H2,1-2H3,(H,25,26)	AIJTTZAVMXIJGM-UHFFFAOYSA-N	1-cyclopropyl-6-fluoro-5-methyl-7-(3-methylpiperazin-1-yl)-4-oxoquinoline-3-carboxylic acid	C19H22FN3O3	1	0	3	0	0	4	-0.29508	80.29	3	3	359.401	Fc1c(c2c(N(C=C(C(=O)[O-])C2=O)C2CC2)cc1N1CC([NH2+]CC1)C)C	Anti-Infective Agents;Chemical Actions and Uses;Therapeutic Uses;Anti-Bacterial Agents;Pharmacologic Actions	Grepafloxacin;Raxar;Grepafloxacin [INN];Grepafloxacin (unspecified);CCRIS 7284;119914-60-2;CHEMBL583;AC1L2I4Z;UNII-L1M1U2HC31;CHEBI:117136;DB00365;NCGC00167527-01;LS-141560;C11368;1-Cyclopropyl-6-fluoro-1,4-dihydro-5-methyl-7-(3-methyl-1-piperazinyl)-4-oxo-3-quinolinecarboxylic acid;3-Quinolinecarboxylic acid, 1,4-dihydro-1-cyclopropyl-6-fluoro-5-methyl-7-(3-methyl-1-piperazinyl)-4-oxo-;3-Quinoli…	Drug / Therapeutic Agent;(+/-); MONOHYDROCHLORIDE;Reproductive Effect;Quinolones;NIAID ChemDB HIV, Opportunistic Infections and Tuberculosis Therapeutics Database;Anti-Infective Agents;Mechanism of action: Grepafloxacin exerts its antibacterial activity by inhibiting bacterial topoisomerase II (DNA gyrase) and topoisomerase IV, essential enzymes for duplication, transcription, and repair of bacte…
232	Antibacterial	DB00467	3229	Enoxacin	Quinolone	Quinolone	Topoisomerase	InChI=1S/C15H17FN4O3/c1-2-19-8-10(15(22)23)12(21)9-7-11(16)14(18-13(9)19)20-5-3-17-4-6-20/h7-8,17H,2-6H2,1H3,(H,22,23)	IDYZIJYBMGIQMJ-UHFFFAOYSA-N	1-ethyl-6-fluoro-4-oxo-7-piperazin-1-yl-1,8-naphthyridine-3-carboxylic acid	C15H17FN4O3	2	0	3	0	0	3	-1.7395	93.18	4	3	320.324	Fc1cc2c(nc1N1CC[NH2+]CC1)N(C=C(C(=O)[O-])C2=O)CC	Chemical Actions and Uses;Enzyme Inhibitors;Molecular Mechanisms of Pharmacological Action;Anti-Infective Agents;Therapeutic Uses;Nucleic Acid Synthesis Inhibitors;Pharmacologic Actions	enoxacin;Penetrex;Comprecin;Enoxacine;Enoxacino;Enoxacinum;Flumark;AT-2266;74011-58-8;Bactidan;Enoram;Enoxor;CI-919;Enoxacine [French];Enoxacinum [Latin];Enoxacino [Spanish];CI 919;Almitil;CHEBI:157175;PD 107779;PD-107779;1-Ethyl-6-fluoro-1,4-dihydro-4-oxo-7-(1-piperazinyl)-1,8-naphthyridine-3-carboxylic acid;Penetrex (TN);Prestwick_708;CCRIS 5242;Spectrum_001539;Enoxacin (USAN/INN);AC1L1FGQ;Pres…	DTP/NCI DIS cdk 1.4.4. Release-October 2011.;NIAID ChemDB HIV, Opportunistic Infections and Tuberculosis Therapeutics Database;"Substance included in EPA DSSTox GEOGSE: National Center for Biotechnology Information (NCBI) Gene Expression Omnibus (GEO) Series Experiment Structure-Index Locator File <a href=""http://www.epa.gov/ncct/dsstox/sdf_geogse.html""target=""_blank"">[link to DSSTox SDF Down…
233	Antibacterial	DB00487	51081	Pefloxacin	Quinolone	Quinolone	Topoisomerase	InChI=1S/C17H20FN3O3/c1-3-20-10-12(17(23)24)16(22)11-8-13(18)15(9-14(11)20)21-6-4-19(2)5-7-21/h8-10H,3-7H2,1-2H3,(H,23,24)	FHFYDNQZQSQIAI-UHFFFAOYSA-N	1-ethyl-6-fluoro-7-(4-methylpiperazin-1-yl)-4-oxoquinoline-3-carboxylic acid	C17H20FN3O3	1	0	3	0	0	3	-1.1832	68.12	3	3	333.363	Fc1cc2c(N(C=C(C(=O)[O-])C2=O)CC)cc1N1CC[NH+](CC1)C	Nucleic Acid Synthesis Inhibitors;Pharmacologic Actions;Chemical Actions and Uses;Enzyme Inhibitors;Molecular Mechanisms of Pharmacological Action;Therapeutic Uses;Anti-Infective Agents	Pefloxacin;Pefloxacine;Pefloxacinum;Pefloxacino;PFLX;Pefloxacin [INN-French];Pefloxacinum [INN-Latin];Pefloxacino [INN-Spanish];Abactal;Labocton;Peflacine;Silver Pefloxacin;1584RB;AM-725;CHEBI:50199;AC1L1AEA;Pefloxacin (USAN/INN);Spectrum2_000034;Spectrum3_001971;EINECS 274-611-8;70458-92-3;AC1Q5RD0;EU 5306;BRN 0567618;Oprea1_063677;Oprea1_546341;BAS 00463355;BSPBio_003571;Pefloxacin [USAN:BAN:IN…	Stock_Building_Blocks;Quinolones;Whole Molecule;Drug / Therapeutic Agent;Gold Collection;MLSMR_SAMPLE_SUPPLIER: Asinex Ltd.;ATC code: J01MA03;MESYLATE;Activity: Antibacterial;Groups: approved;BIOA;BIOMOL:DL-471;1-ethyl-6-fluoranyl-7-(4-methylpiperazin-1-yl)-4-oxidanylidene-quinoline-3-carboxylic acid;Indication: For the treatment of uncomplicated gonococcal urethritis in males and for gram-negati…
234	Antibacterial	DB00537	2764	Ciprofloxacin	Quinolone	Quinolone	Topoisomerase	InChI=1S/C17H18FN3O3/c18-13-7-11-14(8-15(13)20-5-3-19-4-6-20)21(10-1-2-10)9-12(16(11)22)17(23)24/h7-10,19H,1-6H2,(H,23,24)	MYSWGUAQZAJSOK-UHFFFAOYSA-N	1-cyclopropyl-6-fluoro-4-oxo-7-piperazin-1-ylquinoline-3-carboxylic acid	C17H18FN3O3	1	0	3	0	0	4	-0.992	80.29	3	3	331.347	Fc1cc2c(N(C=C(C(=O)[O-])C2=O)C2CC2)cc1N1CC[NH2+]CC1	Anti-Infective Agents;Nucleic Acid Synthesis Inhibitors;Chemical Actions and Uses;Enzyme Inhibitors;Molecular Mechanisms of Pharmacological Action;Pharmacologic Actions;Therapeutic Uses	ciprofloxacin;Ciprobay;Ciproxan;Ciprofloxacina;Ciprofloxacine;Cipro;Ciprofloxacino;Ciprofloxacinum;Bacquinor;Bernoflox;Cifloxin;Ciprocinol;Ciprodar;Cipromycin;Ciproquinol;Septicide;Cipro XR;Ciprecu;Ciprinol;Ciproflox;Ciprogis;Ciprolin;Ciprolon;Ciprowin;Ciproxina;Ciproxine;Citopcin;Corsacin;Fimoflox;Ipiflox;Italnik;Probiox;Proflaxin;Proflox;Quinolid;Quintor;Roxytal;Spitacin;Superocin;Zumaflox;Bafl…	HTS-Compound;STRUCTURE NOT AVAILABLE FOR CRL-1605;Mutation data;NINDS:1503614;FDA_Orange_Book_Extended;"ncgc library id: <a href=""http://ncgc.nih.gov/db/browse.aspx?libid=prestwick"">prestwick</a>";Structure Shown: tested chemical;An oxidation sensing mechanism is used by a global regulator MgrA in Staphylococcus aureus;"For further information visit the ArrayExpress Repository Microarray Experi…
235	Antibacterial	DB00685	62959	Trovafloxacin	Quinolone	Quinolone	Topoisomerase	InChI=1S/C20H15F3N4O3/c21-8-1-2-15(13(22)3-8)27-7-12(20(29)30)17(28)9-4-14(23)19(25-18(9)27)26-5-10-11(6-26)16(10)24/h1-4,7,10-11,16H,5-6,24H2,(H,29,30)/t10-,11+,16?	WVPSKSLAZQPAKQ-SOSAQKQKSA-N	7-[(1S,5R)-6-amino-3-azabicyclo[3.1.0]hexan-3-yl]-1-(2,4-difluorophenyl)-6-fluoro-4-oxo-1,8-naphthyridine-3-carboxylic acid	C20H15F3N4O3	2	0	3	0	1	5	0.1436	104.21	4	3	416.359	Fc1cc(F)ccc1N1C=C(C(=O)[O-])C(=O)c2cc(F)c(nc12)N1CC2C(C1)C2[NH3+]	Pharmacologic Actions;Anti-Infective Agents;Therapeutic Uses;Chemical Actions and Uses	Trovafloxacin;Trovan;TVFX;Trovan (oral);Fluorinated quinolone;Trovafloxacin (INN);Trovafloxacin [INN];147059-72-1;CHEMBL428;AC1Q4NG5;UNII-9F388J00UK;AC1L1Y44;C20H15F3N4O3;AKOS000277872;CP99219;DB00685;LS-95890;CP-99,219;C07664;D08654;146836-84-2;7-[(1R,5S,6s)-6-amino-3-azabicyclo[3.1.0]hex-3-yl]-1-(2,4-difluorophenyl)-6-fluoro-4-oxo-1,4-dihydro-1,8-naphthyridine-3-carboxylic acid;(1alpha,5alpha,6…	For further information visit the ArrayExpress Repository Microarray Experiment Accession ID E-GEOD-9166 <a href="http://www.ebi.ac.uk/arrayexpress/experiments/E-GEOD-9166"target="_blank">Display ArrayExpress Webpage</a>;Quinolones;Target: DNA gyrase inhibitor;Activity: Antibiotic, gyrase inhibitor;"For further information visit GEO Series Microarray Experiment Accession ID GSE8858 <a href=""http…
236	Antibacterial	DB00779	4421	Nalidixic Acid	Quinolone	Quinolone	Topoisomerase	InChI=1S/C12H12N2O3/c1-3-14-6-9(12(16)17)10(15)8-5-4-7(2)13-11(8)14/h4-6H,3H2,1-2H3,(H,16,17)	MHWLWQUZZRMNGJ-UHFFFAOYSA-N	1-ethyl-7-methyl-4-oxo-1,8-naphthyridine-3-carboxylic acid	C12H12N2O3	2	0	2	0	0	2	0.04642	73.33	2	3	231.231	O=C1c2ccc(nc2N(C=C1C(=O)[O-])CC)C	Nucleic Acid Synthesis Inhibitors;Pharmacologic Actions;Anti-Infective Agents;Chemical Actions and Uses;Enzyme Inhibitors;Molecular Mechanisms of Pharmacological Action;Therapeutic Uses	nalidixic acid;Nalidixin;Nevigramon;Uronidix;Innoxalon;Nalidixan;Nalidixate;Nalitucsan;Sicmylon;Unaserus;Wintomylon;Dixiben;Dixinal;Jicsron;Nalurin;Naxuril;Cybis;Nalix;Nogram;Urisal;Nalidic acid;NegGram;Nalidixinic acid;Negram;Naldixic acid;389-08-2;Betaxina;Eucistin;Kusnarin;Nalidicron;Narigix;Nicelate;Specifen;Specifin;Uralgin;Uriclar;Urodixin;Wintron;naladixic acid;Poleon;Uriben;Uroman;Uroneg;…	NCGC_Library_ID: <a href="http://ncgc.nih.gov/db/browse.aspx?libid=niehs">niehs</a>;Catalog: RJC 03974;FDA_Orange_Book_Extended;NIH:SAM002554914;Structure Shown: tested chemical;Deposition record created from database Chemistry on host DrZZLaptop on Oct 30, 2011;"Substance included in EPA DSSTox NTPBSI: National Toxicology Program (NTP) Bioassay On-line Database Structure-Index Locator File <a hr…
237	Antibacterial	DB00817	287180	Rosoxacin	Quinolone	Quinolone	Topoisomerase	InChI=1S/C17H14N2O3/c1-2-19-10-14(17(21)22)16(20)13-4-3-12(9-15(13)19)11-5-7-18-8-6-11/h3-10H,2H2,1H3,(H,21,22)	XBPZXDSZHPDXQU-UHFFFAOYSA-N	1-ethyl-4-oxo-7-pyridin-4-ylquinoline-3-carboxylic acid	C17H14N2O3	2	0	3	0	0	3	1.405	73.33	2	3	293.302	O=C1c2c(N(C=C1C(=O)[O-])CC)cc(cc2)-c1ccncc1	Anti-Infective Agents;Chemical Actions and Uses;Pharmacologic Actions;Therapeutic Uses	ROSOXACIN;Acrosoxacin;Eradacil;Winuron;Roxadyl;Rosoxacinum;Eracine;Eradacin;Rosoxacine;Rosoxacino;Rosoxacine [INN-French];Rosoxacino [INN-Spanish];Win 35,213;Rosoxacinum [INN-Latin];Roxadyl (TN);40034-42-2;Rosoxacin (USAN/INN);Rosoxacin [USAN:INN];AC1Q6BFC;EINECS 254-758-4;NSC146617;UNII-3Y1OT3J4NW;NSC 146617;Oprea1_128096;AC1L66T4;CHEMBL291157;Win-35123;C17H14N2O3;1-Ethyl-1,4-dihydro-4-oxo-7-(4-…	1-ethyl-4-oxidanylidene-7-pyridin-4-yl-quinoline-3-carboxylic acid;Activity: Antibacterial;Anti-Infective Agents;ATC code: J01MB01;Deposition record created from database Chemistry on host DrZZLaptop on Oct 30, 2011;DTP/NCI DIS cdk 1.4.4. Release-October 2011.;Groups: approved;InChIKey: XBPZXDSZHPDXQU-UHFFFAOYSA-N;Indication: For the treatment of bacterial infection of respiratory tract, urinary …
238	Antibacterial	DB00827	2762	Cinoxacin	Quinolone	Quinolone	Topoisomerase	InChI=1S/C12H10N2O5/c1-2-14-7-4-9-8(18-5-19-9)3-6(7)11(15)10(13-14)12(16)17/h3-4H,2,5H2,1H3,(H,16,17)	VDUWPHTZYNWKRN-UHFFFAOYSA-N	1-ethyl-4-oxo-[1,3]dioxolo[4,5-g]cinnoline-3-carboxylic acid	C12H10N2O5	4	0	2	0	0	3	-0.4562	91.26	2	5	261.213	O1c2c(OC1)cc1N(N=C(C(=O)[O-])C(=O)c1c2)CC	Anti-Infective Agents;Therapeutic Uses;Chemical Actions and Uses;Pharmacologic Actions	cinoxacin;Cinobac;Compound 64716;Cinoxacine;Cinoxacino;Cinoxacinum;Clinoxacin;Azolinic Acid;28657-80-9;Cinobactin;Uronorm;Cinx;Cinoxacine [INN-French];Cinoxacinum [INN-Latin];Cinoxacino [INN-Spanish];Cinobac (TN);Prestwick_239;CHEBI:3716;Spectrum_000152;AC1L1EEQ;Prestwick0_000780;Prestwick1_000780;Prestwick2_000780;Prestwick3_000780;Spectrum2_000570;Spectrum3_000352;Spectrum4_000289;Spectrum5_000…	MLSMR_SAMPLE_SUPPLIER: Sigma Chemical Company;Microsource:1500190;MLSMR_COMPOUND_CLASS: SS;MLSMR_SUPPLIER_STRUCTURE_ID: C8645;Prestwick:780;InChIKey: VDUWPHTZYNWKRN-UHFFFAOYSA-N;http://mlsmr.evotec.com/MLSMR_HomePage/pdf/pubchem_reference.pdf;Groups: approved;105;"<a href=""http://ctd.mdibl.org/detail.go?view=disease&type=chem&acc=D002937"">Diseases</a>";Whole Molecule;Target: DNA gyrase inhibito…
239	Antibacterial	DB00978	3948	Lomefloxacin	Quinolone	Quinolone	Topoisomerase	InChI=1S/C17H19F2N3O3/c1-3-21-8-11(17(24)25)16(23)10-6-12(18)15(13(19)14(10)21)22-5-4-20-9(2)7-22/h6,8-9,20H,3-5,7H2,1-2H3,(H,24,25)	ZEKZLJVOYLTDKK-UHFFFAOYSA-N	1-ethyl-6,8-difluoro-7-(3-methylpiperazin-1-yl)-4-oxoquinoline-3-carboxylic acid	C17H19F2N3O3	1	0	3	0	0	3	-0.6069	80.29	3	3	351.353	Fc1c2N(C=C(C(=O)[O-])C(=O)c2cc(F)c1N1CC([NH2+]CC1)C)CC	Anti-Infective Agents;Therapeutic Uses;Pharmacologic Actions;Chemical Actions and Uses	lomefloxacin;Lomefloxacine;Lomefloxacino;Lomefloxacinum;LFLX;Lomefloxacine [French];Lomefloxacinum [Latin];Lomefloxacino [Spanish];Maxaquin;DM-10;98079-51-7;CCRIS 6305;Lomefloxacin (USAN);CHEBI:116278;Spectrum_001431;DM 10 (bactericide);Maxaquin (hydrochloride);Prestwick0_000238;Prestwick1_000238;Prestwick2_000238;Prestwick3_000238;Spectrum2_000696;Spectrum3_001494;Spectrum4_000158;Spectrum5_0012…	Same as: <a href="http://pubchem.ncbi.nlm.nih.gov/summary/summary.cgi?sid=9289">C07078</a>;BIOA;NIAID ChemDB HIV, Opportunistic Infections and Tuberculosis Therapeutics Database;98079-51-7;"For further information visit GEO Series Microarray Experiment Accession ID GSE8858 <a href=""http://www.ncbi.nlm.nih.gov/geo/query/acc.cgi?acc=GSE8858target=_blank"">Display GEO Series Webpage</a>";Mutation d…
240	Antibacterial	DB01044	5379	Gatifloxacin	Quinolone	Quinolone	Topoisomerase	InChI=1S/C19H22FN3O4/c1-10-8-22(6-5-21-10)16-14(20)7-12-15(18(16)27-2)23(11-3-4-11)9-13(17(12)24)19(25)26/h7,9-11,21H,3-6,8H2,1-2H3,(H,25,26)	XUBOMFCQGDBHNK-UHFFFAOYSA-N	1-cyclopropyl-6-fluoro-8-methoxy-7-(3-methylpiperazin-1-yl)-4-oxoquinoline-3-carboxylic acid	C19H22FN3O4	2	0	4	0	0	4	-0.5949	89.52	3	4	375.4	Fc1cc2c(N(C=C(C(=O)[O-])C2=O)C2CC2)c(OC)c1N1CC([NH2+]CC1)C	Anti-Infective Agents;Therapeutic Uses;Chemical Actions and Uses;Pharmacologic Actions	Gatifloxacin;Tequin;Zymar;Gatiflo;Gatilox;Gatiquin;Gatispan;Zymaxid;Gaity;AM-1155;CG 5501;CHEBI:5280;Bonoq;112811-59-3;AM 1155;Gatifloxacin [USAN:INN];Gatifloxacin (TN);BMS-206584;Gatifloxacin (INN);GTFX;Zymer (TN);S1340_Selleck;S1340_Sellekc;BMS 206584-01;PD 135432;Kinome_3137;Spectrum_001909;CHEMBL31;Spectrum2_000487;Spectrum3_000999;Spectrum4_001127;Spectrum5_001468;BSPBio_002697;KBioGR_001613…	InterBioScreen:STOCK4S-09964;1-cyclopropyl-6-fluoranyl-8-methoxy-7-(3-methylpiperazin-1-yl)-4-oxidanylidene-quinoline-3-carboxylic acid;"Same as: <a href=""http://pubchem.ncbi.nlm.nih.gov/summary/summary.cgi?sid=96024704"">D08011</a>";ClinicalTrials_gov;Gatifloxacin is an antibiotic of the fourth-generation fluoroquinolone family.;NIH:SAM002589955;NCC_SUPPLIER_STRUCTURE_ID : SRP01230g;180200-66-2…
241	Antibacterial	DB01059	4539	Norfloxacin	Quinolone	Quinolone	Topoisomerase	InChI=1S/C16H18FN3O3/c1-2-19-9-11(16(22)23)15(21)10-7-12(17)14(8-13(10)19)20-5-3-18-4-6-20/h7-9,18H,2-6H2,1H3,(H,22,23)	OGJPXUAPXNRGGI-UHFFFAOYSA-N	1-ethyl-6-fluoro-4-oxo-7-piperazin-1-ylquinoline-3-carboxylic acid	C16H18FN3O3	1	0	3	0	0	3	-1.1345	80.29	3	3	319.336	Fc1cc2c(N(C=C(C(=O)[O-])C2=O)CC)cc1N1CC[NH2+]CC1	Anti-Bacterial Agents;Anti-Infective Agents;Nucleic Acid Synthesis Inhibitors;Chemical Actions and Uses;Enzyme Inhibitors;Molecular Mechanisms of Pharmacological Action;Pharmacologic Actions;Therapeutic Uses	norfloxacin;Noroxin;Norfloxacine;Chibroxin;Norfloxacino;Norfloxacinum;Baccidal;Sebercim;Barazan;Fulgram;70458-96-7;MK-366;AM-715;NFLX;Lexinor;Norflo;CHEBI:100246;Norfloxacine [INN-French];Norfloxacinum [INN-Latin];Norfloxacino [INN-Spanish];AM 715;Noroxin (TN);Prestwick_633;MK 0366;MK-0366;1-Ethyl-6-fluoro-1,4-dihydro-4-oxo-7-(1-piperazinyl)-3-quinolinecarboxylic acid;CCRIS 6302;S1509_Selleck;CHE…	the literature. Click on these links to find specific, curated data for this chemical at CTD:;"Same as: <a href=""http://pubchem.ncbi.nlm.nih.gov/summary/summary.cgi?sid=7847277"">D00210</a>";"For further information visit the ArrayExpress Repository Microarray Experiment Accession ID E-TABM-86 <a href=""http://www.ebi.ac.uk/arrayexpress/experiments/E-TABM-86""target=""_blank"">Display ArrayExpre…
242	Antibacterial	DB01155	9571107	Gemifloxacin	Quinolone	Quinolone	Topoisomerase	InChI=1S/C18H20FN5O4/c1-28-22-14-8-23(6-9(14)5-20)17-13(19)4-11-15(25)12(18(26)27)7-24(10-2-3-10)16(11)21-17/h4,7,9-10H,2-3,5-6,8,20H2,1H3,(H,26,27)/b22-14+	ZRCVYEYHRGVLOC-HYARGMPZSA-N	7-[(4Z)-3-(aminomethyl)-4-methoxyiminopyrrolidin-1-yl]-1-cyclopropyl-6-fluoro-4-oxo-1,8-naphthyridine-3-carboxylic acid	C18H20FN5O4	3	0	5	0	1	4	-1.2999	125.8	5	4	389.387	Fc1cc2c(nc1N1CC(C[NH3+])C(=NOC)C1)N(C=C(C(=O)[O-])C2=O)C1CC1	Chemical Actions and Uses;Pharmacologic Actions;Anti-Bacterial Agents;Anti-Infective Agents;Therapeutic Uses	Gemifloxacin;Gemifloxacin [INN];CHEBI:101853;Factiv (TN);Gemifloxacin (INN);LB 20304;Gemifloxacin mesilate;175463-14-6;CHEMBL430;BSPBio_002308;LB-20304;SB 265805;LB 20304a;Factive;NCGC00178711-01;LS-186992;LS-187779;SB-265805;D08012;1,8-Naphthyridine-3-carboxylic acid, 7-(3-(aminomethyl)-4-(methoxyimino)-1-pyrrolidinyl)-1-cyclopropyl-6-fluoro-1,4-dihydro-4-oxo-;204519-64-2;7-(3-Aminomethyl-4-meth…	NIAID ChemDB HIV, Opportunistic Infections and Tuberculosis Therapeutics Database;Target: DNA gyrase inhibitor;Quinolones;Antibiotics;Anti-Infective Agents;Activity: Antibiotic, gyrase inhibitor;Target: topoisomerase IV inhibitor;Anti-Bacterial Agents;BIOA;MESILATE;ATC code: J01MA15
243	Antibacterial	DB01165	4583	Ofloxacin	Quinolone	Quinolone	Topoisomerase	InChI=1S/C18H20FN3O4/c1-10-9-26-17-14-11(16(23)12(18(24)25)8-22(10)14)7-13(19)15(17)21-5-3-20(2)4-6-21/h7-8,10H,3-6,9H2,1-2H3,(H,24,25)	GSDSWSVVBLHKDQ-UHFFFAOYSA-N		C18H20FN3O4	2	0	2	0	0	4	-1.4222	77.35	3	4	361.373	Fc1cc2c3N(C=C(C(=O)[O-])C2=O)C(COc3c1N1CC[NH+](CC1)C)C	Anti-Infective Agents, Urinary;Chemical Actions and Uses;Enzyme Inhibitors;Molecular Mechanisms of Pharmacological Action;Anti-Infective Agents;Therapeutic Uses;Anti-Bacterial Agents;Nucleic Acid Synthesis Inhibitors;Pharmacologic Actions;Renal Agents	ofloxacin;Floxin;Tarivid;Ofloxacine;Ocuflox;Oflocet;Oxaldin;Visiren;Exocin;OFLX;82419-36-1;Ofloxacina;Ofloxacino;Ofloxacinum;Exocine;Zanocin;DL-8280;Floxin otic;Ofloxacin Otic;Hoe-280;Ofloxacina [DCIT];Ofloxacine [French];Ofloxacinum [Latin];CHEBI:7731;Ofloxacino [Spanish];HOE 280;FLOXIN IN DEXTROSE 5%;CCRIS 5233;PT 01;ORF 18489;DL 8280;BRN 3657947;9-fluoro-3-methyl-10-(4-methylpiperazin-1-yl)-7-…	Renal Agents;MLSMR_SAMPLE_SUPPLIER: Sigma Chemical Company;Anti-Infective Agents;NCC_SUPPLIER_STRUCTURE_ID : O-801;Nucleic Acid Synthesis Inhibitors;Structure Evaluation:Consistent with Molecular Formula.;"For further information visit GEO Series Microarray Experiment Accession ID GSE1642 <a href=""http://www.ncbi.nlm.nih.gov/geo/query/acc.cgi?acc=GSE1642target=_blank"">Display GEO Series Webpage…
244	Antibacterial	DB01208	60464	Sparfloxacin	Quinolone	Quinolone	Topoisomerase	InChI=1S/C19H22F2N4O3/c1-8-5-24(6-9(2)23-8)17-13(20)15(22)12-16(14(17)21)25(10-3-4-10)7-11(18(12)26)19(27)28/h7-10,23H,3-6,22H2,1-2H3,(H,27,28)/t8-,9+	DZZWHBIBMUVIIW-DTORHVGOSA-N	5-amino-1-cyclopropyl-7-[(3S,5R)-3,5-dimethylpiperazin-1-yl]-6,8-difluoro-4-oxoquinoline-3-carboxylic acid	C19H22F2N4O3	1	1	3	0	0	4	-0.4937	106.31	4	3	392.406	Fc1c(N2CC([NH2+]C(C2)C)C)c(F)c2N(C=C(C(=O)[O-])C(=O)c2c1N)C1CC1	Chemical Actions and Uses;Therapeutic Uses;Anti-Bacterial Agents;Anti-Infective Agents;Antitubercular Agents;Pharmacologic Actions	sparfloxacin;Zagam;CI-978;Esparfloxacino;Sparfloxacine;Sparfloxacinum;Spara;AT-4140;CI 978;SPFX;PD-131501;AT 4140;sparfloxacin, cis-isomer;DRG-0143;Sparfloxacine [INN-French];Sparfloxacinum [INN-Latin];Esparfloxacino [INN-Spanish];CHEBI:9212;Zagam (TN);110871-86-8;PD 131501;CHEMBL850;AC1L1TB5;BRN 3658018;UNII-Q90AGA787L;Sparfloxacin & RU 40555;CP 103826;MLS000759417;33967_RIEDEL;AC1Q29E9;Sparflox…	SPARFLOXACIN + RU 40555(STRUCTURE NOT AVAILABLE);Quinolones;Target: topoisomerase IV inhibitor;"For further information visit GEO Series Microarray Experiment Accession ID GSE8858 <a href=""http://www.ncbi.nlm.nih.gov/geo/query/acc.cgi?acc=GSE8858target=_blank"">Display GEO Series Webpage</a>";Activity: Antibacterial [DS:H00110 H00111 H00112 H00297 H00310 H00312 H00325 H00328];Structure Shown: te…
245	Antibacterial	DB01405	60021	Temafloxacin	Quinolone	Quinolone	Topoisomerase	InChI=1S/C21H18F3N3O3/c1-11-9-26(5-4-25-11)19-8-18-13(7-16(19)24)20(28)14(21(29)30)10-27(18)17-3-2-12(22)6-15(17)23/h2-3,6-8,10-11,25H,4-5,9H2,1H3,(H,29,30)	QKDHBVNJCZBTMR-UHFFFAOYSA-N	1-(2,4-difluorophenyl)-6-fluoro-7-(3-methylpiperazin-1-yl)-4-oxoquinoline-3-carboxylic acid	C21H18F3N3O3	1	0	3	0	0	4	0.844	80.29	3	3	417.387	Fc1cc(F)ccc1N1C=C(C(=O)[O-])C(=O)c2cc(F)c(N3CC([NH2+]CC3)C)cc12	Anti-Bacterial Agents;Anti-Infective Agents;Chemical Actions and Uses;Therapeutic Uses;Pharmacologic Actions	Temafloxacin;Omniflox;Temafloxacina;Temafloxacine;Temafloxacine [French];Temafloxacinum;Temafloxacinum [Latin];Temafloxacina [Spanish];A 62254;TEMAFLOXACIN HYDROCHLORIDE;T 1258;CCRIS 6303;108319-06-8;BRN 4301726;3-Quinolinecarboxylic acid, 1-(2,4-difluorophenyl)-6-fluoro-1,4-dihydro-7-(3-methyl-1-piperazinyl)-4-oxo-;3-Quinolinecarboxylic acid, 1,4-dihydro-1-(2,4-difluorophenyl)-6-fluoro-7- (3-met…	NIAID ChemDB HIV, Opportunistic Infections and Tuberculosis Therapeutics Database;"<a href=""http://ctd.mdibl.org/detail.go?view=disease&type=chem&acc=C054745"">Diseases</a>";Groups: withdrawn;Mutation data;"Substance included in EPA DSSTox GEOGSE: National Center for Biotechnology Information (NCBI) Gene Expression Omnibus (GEO) Series Experiment Structure-Index Locator File <a href=""http://www…
246	Antibacterial	DB04576	3357	Fleroxacin	Quinolone	Quinolone	Topoisomerase	InChI=1S/C17H18F3N3O3/c1-21-4-6-22(7-5-21)15-12(19)8-10-14(13(15)20)23(3-2-18)9-11(16(10)24)17(25)26/h8-9H,2-7H2,1H3,(H,25,26)	XBJBPGROQZJDOJ-UHFFFAOYSA-N	6,8-difluoro-1-(2-fluoroethyl)-7-(4-methylpiperazin-1-yl)-4-oxoquinoline-3-carboxylic acid	C17H18F3N3O3	1	0	4	0	0	3	-1.0945	68.12	3	3	369.343	Fc1c2N(C=C(C(=O)[O-])C(=O)c2cc(F)c1N1CC[NH+](CC1)C)CCF	Anti-Infective Agents;Nucleic Acid Synthesis Inhibitors;Therapeutic Uses;Enzyme Inhibitors;Molecular Mechanisms of Pharmacological Action;Pharmacologic Actions;Chemical Actions and Uses	fleroxacin;Megalone;Fleroxicin;AM-833;Fleroxacino;Fleroxacinum;Megalocin;79660-72-3;AM 833;Fleroxacine [French];Fleroxacinum [Latin];Ro 23-6240;Fleroxacino [Spanish];CCRIS 3972;Ro 23-6240/000;Ro-236240;BRN 4300996;3-Quinolinecarboxylic acid, 6,8-difluoro-1-(2-fluoroethyl)-1,4-dihydro-7-(4-methyl-1-piperazinyl)-4-oxo-;6,8-Difluoro-1-(2-fluoroethyl)-1,4-dihydro-7-(4-methyl-1-piperazinyl)-4-oxo-3-qu…	<a href="http://www.tcishanghai.com.cn/catalog/F0646.html">TCI Shanghai</a>;NIAID ChemDB HIV, Opportunistic Infections and Tuberculosis Therapeutics Database;"<a href=""http://www.tokyokasei.co.jp/catalog/F0646.html"">TCI Japan (Tokyo Kasei Kogyo)</a>";Quinolones;The Comparative Toxicogenomics Database (CTD) promotes understanding about the effects of environmental chemicals;Reproductive Effect;D…
247	Antibacterial		3374	Flumequine	Quinolone	Quinolone	Topoisomerase	InChI=1S/C14H12FNO3/c1-7-2-3-8-4-9(15)5-10-12(8)16(7)6-11(13(10)17)14(18)19/h4-7H,2-3H2,1H3,(H,18,19)	DPSPPJIUMHPXMA-UHFFFAOYSA-N		C14H12FNO3	1	0	1	0	0	3	0.79687	60.44	1	3	260.244	Fc1cc2c3N(C=C(C(=O)[O-])C2=O)C(CCc3c1)C	Pharmacologic Actions;Therapeutic Uses;Anti-Infective Agents, Urinary;Chemical Actions and Uses;Renal Agents;Anti-Infective Agents	flumequine;Apurone;42835-25-6;Flumequino;Flumequinum;Flumigal;Flumiquil;Flumisol;Imequyl;Flumix;R 802 (bactericide);Flumequinum [INN-Latin];Flumequino [INN-Spanish];R 802;HSDB 7034;EINECS 255-962-6;ST072199;6,7-Dihydro-9-fluoro-5-methyl-1-oxo-1H,5H-quinolizine-2-carboxylic acid;1H,5H-Benzo(ij)quinolizine-2-carboxylic acid, 9-fluoro-6,7-dihydro-5-methyl-1-oxo-;143984-63-8;SMR000058826;Fantacin;Pre…	Sigma Chemical Company:F7016;Quinolones;Activity: Antibacterial, Veterinary;Depositor-supplied synonyms are taken from MeSH (Medical Subject Headings).;MLSMR_COMPOUND_CLASS: SS;Anti-infective agents, urinary;InChIKey: DPSPPJIUMHPXMA-UHFFFAOYSA-N;Anti-infective agents;the literature. Click on these links to find specific, curated data for this chemical at CTD:;Renal Agents;MLSMR_SAMPLE_SUPPLIER: S…
248	Antibacterial		4410	Nadifloxacin	Quinolone	Quinolone	Topoisomerase	InChI=1S/C19H21FN2O4/c1-10-2-3-12-16-13(18(24)14(19(25)26)9-22(10)16)8-15(20)17(12)21-6-4-11(23)5-7-21/h8-11,23H,2-7H2,1H3,(H,25,26)	JYJTVFIEFKZWCJ-UHFFFAOYSA-N		C19H21FN2O4	2	1	2	0	0	4	0.75797	83.91	2	4	359.377	Fc1cc2c3N(C=C(C(=O)[O-])C2=O)C(CCc3c1N1CCC(O)CC1)C		nadifloxacin;S-Nadifloxacin;OPC-7251;jinofloxacin;Nadifloxacine;Nadifloxacino;Nadifloxacinum;Acuatim;NDFX;Nadifloxacine [INN-French];Nadifloxacinum [INN-Latin];Nadifloxacino [INN-Spanish];Opc 7251;CCRIS 4066;124858-35-1;CHEBI:31889;(+-)-9-Fluoro-6,7-dihydro-8-(4-hydroxypiperidino)-5-methyl-1-oxo-1H,5H-benzo(ij)quinolizine-2-carboxylic acid;1H,5H-Benzo(ij)quinolizine-2-carboxylic acid, 9-fluoro-6,…	BIOMOL:DL-453;Whole Molecule;http://mlsmr.evotec.com/MLSMR_HomePage/pdf/pubchem_reference.pdf;MLSMR_SUPPLIER_STRUCTURE_ID: Prestw-1120;Prestwick Chemical, Inc.:14H11;Sequoia;Prestwick:1120_2009;InChIKey: JYJTVFIEFKZWCJ-UHFFFAOYSA-N;MLSMR_SAMPLE_SUPPLIER: Prestwick Chemical, Inc.;MLSMR_COMPOUND_CLASS: SS;Target: DNA gyrase inhibitor
249	Antibacterial		4628	Oxolinic Acid	Quinolone	Quinolone	Topoisomerase	InChI=1S/C13H11NO5/c1-2-14-5-8(13(16)17)12(15)7-3-10-11(4-9(7)14)19-6-18-10/h3-5H,2,6H2,1H3,(H,16,17)	KYGZCKSPAKDVKC-UHFFFAOYSA-N	5-ethyl-8-oxo-[1,3]dioxolo[4,5-g]quinoline-7-carboxylic acid	C13H11NO5	3	0	2	0	0	3	0.0717	78.9	1	5	260.225	O1c2c(OC1)cc1N(C=C(C(=O)[O-])C(=O)c1c2)CC	Enzyme Inhibitors;Pharmacologic Actions;Anti-Infective Agents;Nucleic Acid Synthesis Inhibitors;Anti-Infective Agents, Urinary;Chemical Actions and Uses;Molecular Mechanisms of Pharmacological Action;Renal Agents;Therapeutic Uses	oxolinic acid;Emyrenil;Nidantin;Prodoxol;14698-29-4;Dioxacin;Gramurin;Oksaren;Oxolinic;Prodoxal;Uroxol;Utibid;Acido oxolinico;Acide oxolinique;Acidum oxolinicum;Cistopax;Orthurine;Starner;Tiurasin;Ultibid;Uritrate;Urotrate;Ossian;Oxoboi;Pietil;Acido ossolico;Uro-alvar;NSC-110364;Acido ossolico [DCIT];5-Ethyl-8-oxo-5,8-dihydro[1,3]dioxolo[4,5-g]quinoline-7-carboxylic acid;Acide oxolinique [INN-Fre…	MLSMR_COMPOUND_CLASS: SS;Nucleic Acid Synthesis Inhibitors;"Same as: <a href=""http://pubchem.ncbi.nlm.nih.gov/summary/summary.cgi?sid=13517"">C11342</a>";Sigma-Aldrich:O 0877;Quinolines;5-ethyl-8-oxidanylidene-[1,3]dioxolo[4,5-g]quinoline-7-carboxylic acid;Agricultural Chemical;Tumor data;"Substance included in EPA DSSTox CPDBAS: Carcinogenic Potency Database (CPDB) Summary Table - All Species D…
250	Antibacterial		4831	Pipemidic acid	Quinolone	Quinolone	Topoisomerase	InChI=1S/C14H17N5O3/c1-2-18-8-10(13(21)22)11(20)9-7-16-14(17-12(9)18)19-5-3-15-4-6-19/h7-8,15H,2-6H2,1H3,(H,21,22)	JOHZPMXAZQZXHR-UHFFFAOYSA-N	8-ethyl-5-oxo-2-piperazin-1-ylpyrido[2,3-d]pyrimidine-6-carboxylic acid	C14H17N5O3	3	0	3	0	0	3	-2.4836	106.07	5	3	303.322	O=C1c2c(nc(nc2)N2CC[NH2+]CC2)N(C=C1C(=O)[O-])CC	Renal Agents;Anti-Infective Agents, Urinary;Chemical Actions and Uses;Pharmacologic Actions;Therapeutic Uses;Anti-Infective Agents	pipemidic acid;Deblaston;piperamic acid;Pipram;Palin;51940-44-4;Pipedac;Pipemid;Uromidin;Dolcol;Acido pipemidico;Acide pipemidique;Acidum pipemidicum;Acido pipemidico [Spanish];1489 RB;RB 1489;Acide pipemidique [INN-French];Acido pipemidico [INN-Spanish];Acidum pipemidicum [INN-Latin];EINECS 257-530-2;BRN 0626575;5,8-Dihydro-8-ethyl-5-oxo-2-(1-piperazinyl)pyrido(2,3-d)pyrimidine-6-carboxylic acid…	Reproductive Effect;the literature. Click on these links to find specific, curated data for this chemical at CTD:;BIOA;"<a href=""http://www.tci-korea.co.kr/catalog/P1773.html"">TCI (Korean Site)</a>";"<a href=""http://www.tciamerica.com/catalog/P1773.html"">TCI America</a>";"<a href=""http://www.tci-asiapacific.com/catalog/P1773.html"">TCI (Asia/Pacific Site)</a>";HTS-Compounds;Depositor-supplie…
251	Antibacterial		4855	Piromidic acid	Quinolone	Quinolone	Topoisomerase	InChI=1S/C14H16N4O3/c1-2-17-8-10(13(20)21)11(19)9-7-15-14(16-12(9)17)18-5-3-4-6-18/h7-8H,2-6H2,1H3,(H,20,21)	RCIMBBZXSXFZBV-UHFFFAOYSA-N	8-ethyl-5-oxo-2-pyrrolidin-1-ylpyrido[2,3-d]pyrimidine-6-carboxylic acid	C14H16N4O3	3	0	3	0	0	3	-0.2668	89.46	4	3	287.299	O=C1c2c(nc(nc2)N2CCCC2)N(C=C1C(=O)[O-])CC	Pharmacologic Actions;Anti-Infective Agents, Urinary;Chemical Actions and Uses;Therapeutic Uses;Anti-Infective Agents;Renal Agents	piromidic acid;Bactramyl;Panacid;Urisept;Zaomeal;Reelon;Actrun C;Enterol;Gastrurol;Pirodal;Septural;Uropir;Acido piromidico;Acide piromidique;Acidum piromidicum;19562-30-2;PD 93;Acide piromidique [INN-French];Acido piromidico [INN-Spanish];Acidum piromidicum [INN-Latin];EINECS 243-161-4;NSC291120;NSC 291120;BRN 0625004;8-ethyl-5-oxo-2-(pyrrolidin-1-yl)-5,8-dihydropyrido[2,3-d]pyrimidine-6-carboxy…	the literature. Click on these links to find specific, curated data for this chemical at CTD:;The Comparative Toxicogenomics Database (CTD) promotes understanding about the effects of environmental chemicals;Pyrrolidines;Microsource;NIAID ChemDB HIV, Opportunistic Infections and Tuberculosis Therapeutics Database;InChIKey: RCIMBBZXSXFZBV-UHFFFAOYSA-N;DTP/NCI DIS cdk 1.4.4. Release-October 2011.;B…
252	Antibacterial		5517	Tosufloxacin	Quinolone	Quinolone	Topoisomerase	InChI=1S/C19H15F3N4O3/c20-9-1-2-15(13(21)5-9)26-8-12(19(28)29)16(27)11-6-14(22)18(24-17(11)26)25-4-3-10(23)7-25/h1-2,5-6,8,10H,3-4,7,23H2,(H,28,29)	WUWFMDMBOJLQIV-UHFFFAOYSA-N	7-(3-aminopyrrolidin-1-yl)-1-(2,4-difluorophenyl)-6-fluoro-4-oxo-1,8-naphthyridine-3-carboxylic acid	C19H15F3N4O3	2	0	3	0	0	4	0.2877	104.21	4	3	404.348	Fc1cc(F)ccc1N1C=C(C(=O)[O-])C(=O)c2cc(F)c(nc12)N1CC([NH3+])CC1		Tosufloxacin;Ozex;Abbott 61827;Tosufloxacin (unspecified);100490-36-6;CCRIS 6304;A 61827;A 67107;108138-46-1;BRN 4913117;TFLX;A-61827;1,8-Naphthyridine-3-carboxylic acid, 1,4-dihydro-7-(3-amino-1-pyrrolidinyl)-1-(2,4-difluorophenyl)-6-fluoro-4-oxo-;Tosufloxacin (USAN);AC1L1KIQ;AC1Q4ONL;100490-94-6;104051-69-6;107097-79-0;CHEMBL273348;C19H15F3N4O3;HMS2090B18;AR-1K9536;AC-3509;NCGC00167536-01;NCGC0…	BIOMOL:DL-188;NIAID ChemDB HIV, Opportunistic Infections and Tuberculosis Therapeutics Database;Target: DNA gyrase inhibitor;InChIKey: WUWFMDMBOJLQIV-UHFFFAOYSA-N;"For further information visit GEO Series Microarray Experiment Accession ID GSE8858 <a href=""http://www.ncbi.nlm.nih.gov/geo/query/acc.cgi?acc=GSE8858""target=_blank>Display GEO Series Webpage</a>";Activity: Antibacterial;Quinolones;7…
253	Antibacterial		56206	Difloxacin	Quinolone	Quinolone	Topoisomerase	InChI=1S/C21H19F2N3O3/c1-24-6-8-25(9-7-24)19-11-18-15(10-17(19)23)20(27)16(21(28)29)12-26(18)14-4-2-13(22)3-5-14/h2-5,10-12H,6-9H2,1H3,(H,28,29)	NOCJXYPHIIZEHN-UHFFFAOYSA-N	6-fluoro-1-(4-fluorophenyl)-7-(4-methylpiperazin-1-yl)-4-oxoquinoline-3-carboxylic acid	C21H19F2N3O3	1	0	3	0	0	4	0.2677	68.12	3	3	399.397	Fc1cc2c(N(C=C(C(=O)[O-])C2=O)c2ccc(F)cc2)cc1N1CC[NH+](CC1)C		Difloxacin;Difloxacin [INN];98106-17-3;Difloxacin (INN);3-Quinolinecarboxylic acid, 6-fluoro-1-(4-fluorophenyl)-1,4-dihydro-7-(4-methyl-1-piperazinyl)-4-oxo-;6-fluoro-1-(4-fluorophenyl)-7-(4-methylpiperazin-1-yl)-4-oxoquinoline-3-carboxylic acid;6-Fluoro-1-(4-fluorophenyl)-7-(4-methyl-1-piperazinyl)-4-oxo-1,4-dihydro-3-quinolinecarboxylic acid;6-fluoro-1-(4-fluorophenyl)-7-(4-methyl-1-piperazinyl…	HTS-Compounds;Quinolones;NIAID ChemDB HIV, Opportunistic Infections and Tuberculosis Therapeutics Database;Activity: Antibiotic [veterinary];InChIKey: NOCJXYPHIIZEHN-UHFFFAOYSA-N;Stock_Building_Blocks;"Same as: <a href=""http://pubchem.ncbi.nlm.nih.gov/summary/summary.cgi?sid=13413"">C11234</a>";"Same as: <a href=""http://pubchem.ncbi.nlm.nih.gov/summary/summary.cgi?sid=96024525"">D07828</a>";HYD…
254	Antibacterial		56208	Sarafloxacin	Quinolone	Quinolone	Topoisomerase	InChI=1S/C20H17F2N3O3/c21-12-1-3-13(4-2-12)25-11-15(20(27)28)19(26)14-9-16(22)18(10-17(14)25)24-7-5-23-6-8-24/h1-4,9-11,23H,5-8H2,(H,27,28)	XBHBWNFJWIASRO-UHFFFAOYSA-N	6-fluoro-1-(4-fluorophenyl)-4-oxo-7-piperazin-1-ylquinoline-3-carboxylic acid	C20H17F2N3O3	1	0	3	0	0	4	0.3164	80.29	3	3	385.37	Fc1cc2c(N(C=C(C(=O)[O-])C2=O)c2ccc(F)cc2)cc1N1CC[NH2+]CC1		Sarafloxacin;Difloxacine [French];Difloxacinum [Latin];98105-99-8;Difloxacino [Spanish];Abbott 57135;Sarafloxacine [INN-French];Sarafloxacinum [INN-Latin];Sarafloxacino [INN-Spanish];HSDB 7035;3-Quinolinecarboxylic acid, 6-fluoro-1-(4-fluorophenyl)-1,4-dihydro-4-oxo-7-(1-piperazinyl)-;6-fluoro-1-(4-fluorophenyl)-4-oxo-7-(piperazin-1-yl)-1,4-dihydroquinoline-3-carboxylic acid;Sarafloxacin hydrochl…	HTS-Compounds;BIOMOL:DL-499;NIAID ChemDB HIV, Opportunistic Infections and Tuberculosis Therapeutics Database;6-fluoranyl-1-(4-fluorophenyl)-4-oxidanylidene-7-piperazin-1-yl-quinoline-3-carboxylic acid;InChIKey: XBHBWNFJWIASRO-UHFFFAOYSA-N;Stock_Building_Blocks;MONOHYDROCHLORIDE;Quinolones;Activity: Antibiotic, gyrase inhibitor; Antiinfective, antibacterial;Whole Molecule
255	Antibacterial		58258	Rufloxacin	Quinolone	Quinolone	Topoisomerase	InChI=1S/C17H18FN3O3S/c1-19-2-4-20(5-3-19)14-12(18)8-10-13-16(14)25-7-6-21(13)9-11(15(10)22)17(23)24/h8-9H,2-7H2,1H3,(H,23,24)	NJCJBUHJQLFDSW-UHFFFAOYSA-N		C17H18FN3O3S	1	0	2	0	0	4	-1.0974	68.12	3	3	363.413	S1c2c3N(C=C(C(=O)[O-])C(=O)c3cc(F)c2N2CC[NH+](CC2)C)CC1		Rufloxacin;Rufloxacine;Rufloxacino;Rufloxacinum;RUFLOXACIN HCl;101363-10-4;MF 934;9-fluoro-10-(4-methylpiperazin-1-yl)-7-oxo-2,3-dihydro-7h-[1,4]thiazino[2,3,4-ij]quinoline-6-carboxylic acid;SMR000466373;UNII-1643374N6L;Rufloxacin (INN);Rufloxacine [French];Rufloxacinum [Latin];Rufloxacino [Spanish];AC1L1OMK;AC1Q3ZWV;MLS000759502;MLS001424127;CHEMBL295619;STOCK6S-14897;UNII-Y521XM2900;MolPort-001…	ATC code: J01MA10;Stock_Building_Blocks;"Same as: <a href=""http://pubchem.ncbi.nlm.nih.gov/summary/summary.cgi?sid=7849529"">D02474</a>";Quinolones;Whole Molecule;MicroSource:01502335;NCC_SUPPLIER_STRUCTURE_ID : SRP01330r;http://mlsmr.evotec.com/MLSMR_HomePage/pdf/pubchem_reference.pdf;NCC_SAMPLE_SUPPLIER : Sequoia Research Products Ltd.;NIH:SAM001246726;HTS-Compounds;InChIKey: NJCJBUHJQLFDSW-UH…
256	Antibacterial		60063	Clinafloxacin	Quinolone	Quinolone	Topoisomerase	InChI=1S/C17H17ClFN3O3/c18-13-14-10(5-12(19)15(13)21-4-3-8(20)6-21)16(23)11(17(24)25)7-22(14)9-1-2-9/h5,7-9H,1-4,6,20H2,(H,24,25)	QGPKADBNRMWEQR-UHFFFAOYSA-N	7-(3-aminopyrrolidin-1-yl)-8-chloro-1-cyclopropyl-6-fluoro-4-oxoquinoline-3-carboxylic acid	C17H17ClFN3O3	1	0	3	0	0	4	0.0986	91.32	3	3	365.792	Clc1c2N(C=C(C(=O)[O-])C(=O)c2cc(F)c1N1CC([NH3+])CC1)C1CC1		CLINAFLOXACIN;Clinafloxacin [INN];CI-960;105956-97-6;PD 127321;3-Quinolinecarboxylic acid, 7-(3-amino-1-pyrrolidinyl)-8-chloro-1-cyclopropyl-6-fluoro-1,4-dihydro-4-oxo-;7-(3-amino-1-pyrrolidinyl)-8-chloro-1-cyclopropyl-6-fluoro-4-oxo-3-quinolinecarboxylic acid;7-(3-aminopyrrolidin-1-yl)-8-chloro-1-cyclopropyl-6-fluoro-4-oxo-1,4-dihydroquinoline-3-carboxylic acid;7-(3-azanylpyrrolidin-1-yl)-8-chlo…	InChIKey: QGPKADBNRMWEQR-UHFFFAOYSA-N;MLSMR_COMPOUND_CLASS: DC;InterBioScreen:STOCK4S-00098;HTS-Compounds;MLSMR_SUPPLIER_STRUCTURE_ID: STOCK4S-00098;HYDROCHLORIDE;Whole Molecule;MLSMR_SAMPLE_SUPPLIER: InterBioScreen;STRUCTURAL ISOMERS(AMINO HAS R OR S CONFIGURATION);"<a href=""http://ctd.mdibl.org/detail.go?view=disease&type=chem&acc=C057477"">Diseases</a>";on human health by curating chemical-ge…
257	Antibacterial		60605	Orbifloxacin	Quinolone	Quinolone	Topoisomerase	InChI=1S/C19H20F3N3O3/c1-8-5-24(6-9(2)23-8)17-14(21)13(20)12-16(15(17)22)25(10-3-4-10)7-11(18(12)26)19(27)28/h7-10,23H,3-6H2,1-2H3,(H,27,28)/t8-,9+	QIPQASLPWJVQMH-DTORHVGOSA-N	1-cyclopropyl-7-[(3S,5R)-3,5-dimethylpiperazin-1-yl]-5,6,8-trifluoro-4-oxoquinoline-3-carboxylic acid	C19H20F3N3O3	1	0	3	0	0	4	0.0632	80.29	3	3	395.381	Fc1c(N2CC([NH2+]C(C2)C)C)c(F)c2N(C=C(C(=O)[O-])C(=O)c2c1F)C1CC1		ORBIFLOXACIN;Orbax;113617-63-3;SMR000544203;SpecPlus_000366;AC1L1TKW;Orbifloxacin (USP/INN);Orbax [veterinary] (TN);MLS000766847;MLS001216436;DivK1c_006462;34041_RIEDEL;AC1Q4N66;CHEMBL295433;UNII-660932TPY6;34041_FLUKA;KBio1_001406;MolPort-001-738-728;BB_SC-2767;HMS2875G03;HMS3264M13;1-Cyclopropyl-5,6,8-trifluoro-1,4-dihydro-7-(cis-3,5-dimethyl-1-piperazinyl)-4-oxo-quinoline-3-carboxylic acid;1-c…	Activity: Antibiotic;MLSMR_SUPPLIER_STRUCTURE_ID: BB_SC-2767;http://mlsmr.evotec.com/MLSMR_HomePage/pdf/pubchem_reference.pdf;Whole Molecule;MLSMR_COMPOUND_CLASS: DC;MLSMR_SUPPLIER_STRUCTURE_ID: STOCK5S-97578;InterBioScreen:BB_SC-2767;1-cyclopropyl-7-[(3R,5S)-3,5-dimethylpiperazin-1-yl]-5,6,8-tris(fluoranyl)-4-oxidanylidene-quinoline-3-carboxylic acid;MicroSource:01503711;MLSMR_SAMPLE_SUPPLIER: I…
258	Antibacterial		60651	Marbofloxacin	Quinolone	Quinolone	Topoisomerase	InChI=1S/C17H19FN4O4/c1-19-3-5-21(6-4-19)14-12(18)7-10-13-16(14)26-9-20(2)22(13)8-11(15(10)23)17(24)25/h7-8H,3-6,9H2,1-2H3,(H,24,25)	BPFYOAJNDMUVBL-UHFFFAOYSA-N		C17H19FN4O4	3	0	2	0	0	4	-2.0064	80.59	4	4	362.361	Fc1cc2c3N(N(COc3c1N1CC[NH+](CC1)C)C)C=C(C(=O)[O-])C2=O	Chemical Actions and Uses;Pharmacologic Actions;Therapeutic Uses;Anti-Bacterial Agents;Anti-Infective Agents	Marbofloxacin;115550-35-1;Marbofloxacine [INN-French];Marbofloxacinum [INN-Latin];Marbofloxacino [INN-Spanish];Marbofloxacin (INN);Marbofloxacin [INN];Marbocyl, Zeniquin, Marbofloxacin;7H-Pyrido(3,2,1-ij)(4,1,2)benzoxadiazine-6-carboxylic acid, 2,3-dihydro-9-fluoro-3-methyl-10-(4-methyl-1-piperazinyl)-7-oxo-;9-Fluoro-2,3-dihydro-3-methyl-10-(4-methyl-1-piperazinyl)-7-oxo-7H-pyrido(3,2,1-ij)(4,1,2…	Marbofloxacin is a potent antibiotic of the fluoroquinolone group.;Whole Molecule;Drug / Therapeutic Agent;InChIKey: BPFYOAJNDMUVBL-UHFFFAOYSA-N;Activity: Antibiotic [veterinary];The Comparative Toxicogenomics Database (CTD) promotes understanding about the effects of environmental chemicals;"<a href=""http://ctd.mdibl.org/detail.go?view=disease&type=chem&acc=C080260"">Diseases</a>";the literatur…
259	Antibacterial		65947	Prulifloxacin	Quinolone	Quinolone	Topoisomerase	InChI=1S/C21H20FN3O6S/c1-10-16(31-21(29)30-10)9-23-3-5-24(6-4-23)15-8-14-12(7-13(15)22)18(26)17(20(27)28)19-25(14)11(2)32-19/h7-8,11H,3-6,9H2,1-2H3,(H,27,28)	PWNMXPDKBYZCOO-UHFFFAOYSA-N	6-fluoro-1-methyl-7-[4-[(5-methyl-2-oxo-1,3-dioxol-4-yl)methyl]piperazin-1-yl]-4-oxo-1H-[1,3]thiazeto[3,2-a]quinoline-3-carboxylic acid	C21H20FN3O6S	2	0	4	0	3	5	-0.0141	103.65	3	6	461.47	S1C=2N(c3c(cc(F)c(N4CC[NH+](CC4)CC=4OC(OC=4C)=O)c3)C(=O)C=2C(=O)[O-])C1C		Prulifloxacin;NM 441;CCRIS 7686;123447-62-1;1H,4H-(1,3)Thiazeto(3,2-a)quinoline-3-carboxylic acid, 6-fluoro-1-methyl-7-(4-((5-methyl-2-oxo-1,3-dioxol-4-yl)methyl)-1-piperazinyl)-4-oxo-;Quisnon;Pruvel;Sword;NM-441;Prulifloxacin [INN];AC1L24AZ;AC1Q6H3L;UNII-J42298IESW;Bio-0141;CHEMBL422648;NAD-441A;OPT-99;MolPort-001-738-686;STK626148;AKOS005559236;AC-2012;NCGC00164615-01;LS-150467;I06-0209;I06-186…	Whole Molecule;InterBioScreen;"<a href=""http://ctd.mdibl.org/detail.go?view=pathway&type=chem&acc=C074191"">Pathways</a>";InChIKey: PWNMXPDKBYZCOO-UHFFFAOYSA-N;Drug / Therapeutic Agent;"<a href=""http://ctd.mdibl.org/detail.go?view=gene&type=chem&acc=C074191"">Genes and Proteins</a>";HTS-Compounds;The Comparative Toxicogenomics Database (CTD) promotes understanding about the effects of environme…
260	Antibacterial		65957	Pazufloxacin	Quinolone	Quinolone	Topoisomerase	InChI=1S/C16H15FN2O4/c1-7-6-23-14-11(16(18)2-3-16)10(17)4-8-12(14)19(7)5-9(13(8)20)15(21)22/h4-5,7H,2-3,6,18H2,1H3,(H,21,22)/t7-/m0/s1	XAGMUUZPGZWTRP-ZETCQYMHSA-N		C16H15FN2O4	2	0	2	0	0	4	-0.2144	97.31	2	4	318.304	Fc1cc2c3N(C=C(C(=O)[O-])C2=O)C(COc3c1C1([NH3+])CC1)C	Chemical Actions and Uses;Pharmacologic Actions;Therapeutic Uses;Antitubercular Agents;Anti-Bacterial Agents;Anti-Infective Agents	Pazufloxacin;T-3761;CCRIS 7312;127045-41-4;T 3761;7H-Pyrido(1,2,3-de)-1,4-benzoxazine-6-carboxylic acid, 10-(1-aminocyclopropyl)-9-fluoro-2,3-dihydro-3-methyl-7-oxo-, (S)-;(-)-(3S)-10-(1-Aminocyclopropyl)-9-fluoro-2,3-dihydro-3-methyl-7-oxo-7H-pyrido(1,2,3-de)-1,4-benzoxazine-6-carboxylic acid;7H-Pyrido(1,2,3-de)-1,4-benzoxazine-6-carboxylic acid, 2,3-dihydro-10-(1-aminocyclopropyl)-9-fluoro-3-me…	InChIKey: XAGMUUZPGZWTRP-ZETCQYMHSA-N;127045-41-4;the literature. Click on these links to find specific, curated data for this chemical at CTD:;ATC code: J01MA18;MLSMR_SAMPLE_SUPPLIER: Sequoia Research Products Ltd.;The Comparative Toxicogenomics Database (CTD) promotes understanding about the effects of environmental chemicals;Reproductive Effect;"<a target=_blank href=""mailto:info@seqchem.com?…
261	Antibacterial		65958	Balofloxacin	Quinolone	Quinolone	Topoisomerase	InChI=1S/C20H24FN3O4/c1-22-11-4-3-7-23(9-11)17-15(21)8-13-16(19(17)28-2)24(12-5-6-12)10-14(18(13)25)20(26)27/h8,10-12,22H,3-7,9H2,1-2H3,(H,26,27)	MGQLHRYJBWGORO-UHFFFAOYSA-N	1-cyclopropyl-6-fluoro-8-methoxy-7-[3-(methylamino)piperidin-1-yl]-4-oxoquinoline-3-carboxylic acid	C20H24FN3O4	2	0	5	0	0	4	-0.2048	89.52	3	4	389.427	Fc1cc2c(N(C=C(C(=O)[O-])C2=O)C2CC2)c(OC)c1N1CC([NH2+]C)CCC1		Balofloxacin;Baloxin;Q 35;127294-70-6;Balofloxacin [INN];(+-)-1-Cyclopropyl-6-fluoro-1,4-dihydro-8-methoxy-7-(3-(methylamino)piperidino)-4-oxo-3-quinolinecarboxylic acid;3-Quinolinecarboxylic acid, 1-cyclopropyl-6-fluoro-1,4-dihydro-8-methoxy-7-(3-(methylamino)-1-piperidinyl)-4-oxo-;AC1L24BT;AC1Q4N6B;UNII-Q022B63JPM;CHEMBL1210954;NCGC00167532-01;LS-141556;TL8000675;FT-0082371;ST51053894;I14-0602;…	InChIKey: MGQLHRYJBWGORO-UHFFFAOYSA-N;Drug / Therapeutic Agent;Whole Molecule;Quinolones;1-cyclopropyl-6-fluoranyl-8-methoxy-7-[3-(methylamino)piperidin-1-yl]-4-oxidanylidene-quinoline-3-carboxylic acid;127294-70-6;Reproductive Effect;NIAID ChemDB HIV, Opportunistic Infections and Tuberculosis Therapeutics Database
262	Antibacterial		71186	Ibafloxacin	Quinolone	Quinolone	Topoisomerase	InChI=1S/C15H14FNO3/c1-7-3-4-9-8(2)12(16)5-10-13(9)17(7)6-11(14(10)18)15(19)20/h5-7H,3-4H2,1-2H3,(H,19,20)	DXKRGNXUIRKXNR-UHFFFAOYSA-N		C15H14FNO3	1	0	1	0	0	3	1.10529	60.44	1	3	274.271	Fc1cc2c3N(C=C(C(=O)[O-])C2=O)C(CCc3c1C)C		Ibafloxacin;91618-36-9;9-fluoro-6,7-dihydro-5,8-dimethyl-1-oxo-1h,5h-benzo[ij]quinolizine-2-carboxylic acid;Ibafloxacine;Ibafloxacino;Ibafloxacinum;1H,5H-Benzo(ij)quinolizine-2-carboxylic acid, 9-fluoro-6,7-dihydro-5,8-dimethyl-1-oxo-;1H,5H-Benzo[ij]quinolizine-2-carboxylic acid, 9-fluoro-6,7-dihydro-5,8-dimethyl-1-oxo-;AC1Q4OAT;Ibafloxacin (USAN/INN);Ibafloxacine [INN-French];Ibafloxacinum [INN-…	Activity: Antibacterial;InChIKey: DXKRGNXUIRKXNR-UHFFFAOYSA-N;NIAID ChemDB HIV, Opportunistic Infections and Tuberculosis Therapeutics Database;Quinolizines;Quinolones;Whole Molecule
263	Antibacterial		71188	Enrofloxacin	Quinolone	Quinolone	Topoisomerase	InChI=1S/C19H22FN3O3/c1-2-21-5-7-22(8-6-21)17-10-16-13(9-15(17)20)18(24)14(19(25)26)11-23(16)12-3-4-12/h9-12H,2-8H2,1H3,(H,25,26)	SPFYMRJSYKOXGV-UHFFFAOYSA-N	1-cyclopropyl-7-(4-ethylpiperazin-1-yl)-6-fluoro-4-oxoquinoline-3-carboxylic acid	C19H22FN3O3	1	0	4	0	0	4	-0.6506	68.12	3	3	359.401	Fc1cc2c(N(C=C(C(=O)[O-])C2=O)C2CC2)cc1N1CC[NH+](CC1)CC	Antineoplastic Agents;Chemical Actions and Uses;Pharmacologic Actions;Therapeutic Uses	Enrofloxacin;Baytril;Enrofloxacine;CFPQ;93106-60-6;Enrofloxacino;Enrofloxacinum;BAY VP 2674;Bay-Vp-2674;Enrofloxacine [French];Enrofloxacinum [Latin];Enrofloxacino [Spanish];CHEBI:35720;HSDB 6952;BRN 5307824;endrofloxicin;1,4-Dihydro-1-cyclopropyl-7-(4-ethyl-1-piperazinyl)-6-fluoro-4-oxo-3-quinolinecarboxylic acid;1-Cyclopropyl-7-(4-ethyl-1-piperazinyl)-6-fluoro-1,4-dihydro-4-oxo-3-quinolinecarbo…	NIAID ChemDB HIV, Opportunistic Infections and Tuberculosis Therapeutics Database;"<a href=""http://www.tci-india.com/catalog/E0786.html"">TCI India</a>";BIOMOL:DL-384;Microsource;HTS-Compounds;The Comparative Toxicogenomics Database (CTD) promotes understanding about the effects of environmental chemicals;"<a href=""http://ctd.mdibl.org/detail.go?view=disease&type=chem&acc=C052904"">Diseases</a>…
264	Antibacterial		71335	Danofloxacin	Quinolone	Quinolone	Topoisomerase	InChI=1S/C19H20FN3O3/c1-21-7-12-4-11(21)8-22(12)17-6-16-13(5-15(17)20)18(24)14(19(25)26)9-23(16)10-2-3-10/h5-6,9-12H,2-4,7-8H2,1H3,(H,25,26)/t11-,12-/m0/s1	QMLVECGLEOSESV-RYUDHWBXSA-N	1-cyclopropyl-6-fluoro-7-[(1S,4S)-5-methyl-2,5-diazabicyclo[2.2.1]heptan-2-yl]-4-oxoquinoline-3-carboxylic acid	C19H20FN3O3	1	0	3	0	1	5	-0.8998	68.12	3	3	357.385	Fc1cc2c(N(C=C(C(=O)[O-])C2=O)C2CC2)cc1N1C2CC([NH+](C2)C)C1		Danofloxacin;Danofloxacine;Danofloxacino;Danofloxacinum;(1s)-1-cyclopropyl-6-fluoro-1,4-dihydro-7-(5-methyl-2,5-diazabicyclo[2.2.1]hept-2-yl)-4-oxo-3-quinolinecarboxylic acid;112398-08-0;Advocin (TN);Danofloxacin (INN);AC1L2FYT;Danofloxacin [INN:BAN];AC1Q5RE0;Danofloxacine [INN-French];Danofloxacinum [INN-Latin];UNII-24CU1YS91D;Danofloxacino [INN-Spanish];CHEMBL157548;KST-1A0626;A180 (TN);AR-1A14…	Sequoia;Activity: Antibiotic, gyrase inhibitor [veterinary];1-cyclopropyl-6-fluoranyl-7-[(1S,4S)-5-methyl-2,5-diazabicyclo[2.2.1]heptan-2-yl]-4-oxidanylidene-quinoline-3-carboxylic acid
265	Antibacterial		100594	Saframycin A	Quinolone	Quinolone	Topoisomerase	InChI=1S/C29H30N4O8/c1-11-23(35)14-8-17-22-21-15(24(36)12(2)28(41-6)26(21)38)7-16(32(22)4)18(9-30)33(17)19(10-31-29(39)13(3)34)20(14)25(37)27(11)40-5/h16-19,22H,7-8,10H2,1-6H3,(H,31,39)/t16-,17-,18-,19-,22-/m0/s1	JNEGMBHBUAJRSX-SHUHUVMISA-N		C29H30N4O8	9	1	7	2	3	5	-2.98362	165.58	4	8	564.595	O(C)C1=C(C)C(=O)C2=C(C1=O)C([NH+]1C(C3[NH+](C(CC4=C3C(=O)C(OC)=C(C)C4=O)C1C#N)C)C2)CNC(=O)C(=O)C	Antibiotics, Antineoplastic;Anti-Bacterial Agents;Anti-Infective Agents;Antineoplastic Agents;Chemical Actions and Uses;Pharmacologic Actions;Therapeutic Uses	Saframycin A;21-Cyanosaframycin-B;NSC 325663;21-cyanosaframycin B;AC1L2P2O;CHEMBL452709;C29H30N4O8;ONO-6126;DCL000906;DNC001265;LS-144089	Anti-Bacterial Agents;Anti-Infective Agents;Antibiotics, antineoplastic;Antineoplastic Agents;Drug / Therapeutic Agent;http://www.nature.com/naturechemicalbiology;Koketsu et al.;Mutation data;Natural Product;Nature Chemical Biology, doi: 10.1038/nchembio.365, published online 9 May 2010;Reconstruction of the saframycin core scaffold defines dual Pictet-Spengler mechanisms.
266	Antibacterial		124093	Garenoxacin	Quinolone	Quinolone	Topoisomerase	InChI=1S/C23H20F2N2O4/c1-11-15-5-2-12(8-13(15)9-26-11)16-6-7-17-19(21(16)31-23(24)25)27(14-3-4-14)10-18(20(17)28)22(29)30/h2,5-8,10-11,14,23,26H,3-4,9H2,1H3,(H,29,30)/t11-/m1/s1	NJDRXTDGYFKORP-LLVKDONJSA-N	1-cyclopropyl-8-(difluoromethoxy)-7-[(1R)-1-methyl-2,3-dihydro-1H-isoindol-5-yl]-4-oxoquinoline-3-carboxylic acid	C23H20F2N2O4	2	0	5	0	1	5	2.2538	86.28	2	4	426.419	FC(F)Oc1c2N(C=C(C(=O)[O-])C(=O)c2ccc1-c1cc2c(cc1)C([NH2+]C2)C)C1CC1		Garenoxacin;AC1L3XUP;UNII-V72H9867WB;T-3811MEa;CHEMBL215303;194804-75-6;T 3811;T-3811;BMS 284756 (*Mesylate salt*);BMS-284756 (*Mesylate salt*);NCGC00181770-01;223652-82-2 (MESYLATE SALT);1-Cyclopropyl-8-(difluoromethoxy)-7-[(1R)-(1-methyl-2,3-dihydro-1H-5-isoindolyl)-4-oxo-1,4-dihydro-3-quinolinecarboxylic acid;1-cyclopropyl-8-(difluoromethoxy)-7-[(1R)-1-methyl-2,3-dihydro-1H-isoindol-5-yl]-4-ox…	(+) ISOMER; MESYLATE SALT, MONOHYDRATE;Isoindoles;InChIKey: NJDRXTDGYFKORP-LLVKDONJSA-N;Whole Molecule;Quinolines;NIAID ChemDB HIV, Opportunistic Infections and Tuberculosis Therapeutics Database;8-[bis(fluoranyl)methoxy]-1-cyclopropyl-7-[(1R)-1-methyl-2,3-dihydro-1H-isoindol-5-yl]-4-oxidanylidene-quinoline-3-carboxylic acid;Antibiotic
267	Antibacterial		461399	Sitafloxacin	Quinolone	Quinolone	Topoisomerase	InChI=1S/C19H18ClF2N3O3/c20-14-15-8(17(26)9(18(27)28)5-25(15)12-4-10(12)21)3-11(22)16(14)24-6-13(23)19(7-24)1-2-19/h3,5,10,12-13H,1-2,4,6-7,23H2,(H,27,28)/t10-,12+,13+/m0/s1	PNUZDKCDAWUEGK-CYZMBNFOSA-N	7-[(7S)-7-amino-5-azaspiro[2.4]heptan-5-yl]-8-chloro-6-fluoro-1-[(1R,2S)-2-fluorocyclopropyl]-4-oxoquinoline-3-carboxylic acid	C19H18ClF2N3O3	1	0	3	0	1	5	0.4367	91.32	3	3	409.82	Clc1c2N(C=C(C(=O)[O-])C(=O)c2cc(F)c1N1CC2(CC2)C([NH3+])C1)C1CC1F		Sitafloxacin;127254-12-0;DU-6859a;127254-10-8;STFX;DU 6859A;7-[(7S)-7-amino-5-azaspiro[2.4]heptan-5-yl]-8-chloro-6-fluoro-1-[(1R,2S)-2-fluorocyclopropyl]-4-oxo-3-quinolinecarboxylic acid;7-[(7S)-7-azanyl-5-azaspiro[2.4]heptan-5-yl]-8-chloranyl-6-fluoranyl-1-[(1R,2S)-2-fluoranylcyclopropyl]-4-oxidanylidene-quinoline-3-carboxylic acid;AC1LA46J;AC-1388;NCGC00183844-01;A805671;A805673;163253-36-9;163…	Quinolones;7-[(7S)-7-azanyl-5-azaspiro[2.4]heptan-5-yl]-8-chloranyl-6-fluoranyl-1-[(1R,2S)-2-fluoranylcyclopropyl]-4-oxidanylidene-quinoline-3-carboxylic acid;3/2 H20; ACETATE; MONOHYDRATE; HEMIHYDRATE;NIAID ChemDB HIV, Opportunistic Infections and Tuberculosis Therapeutics Database
268	Antibacterial		487101	Delafloxacin	Quinolone	Quinolone	Topoisomerase	InChI=1S/C18H12ClF3N4O4/c19-12-13-7(1-9(20)14(12)25-3-6(27)4-25)15(28)8(18(29)30)5-26(13)17-11(22)2-10(21)16(23)24-17/h1-2,5-6,27H,3-4H2,(H2,23,24)(H,29,30)	DYDCPNMLZGFQTM-UHFFFAOYSA-N	1-(6-amino-3,5-difluoropyridin-2-yl)-8-chloro-6-fluoro-7-(3-hydroxyazetidin-1-yl)-4-oxoquinoline-3-carboxylic acid	C18H12ClF3N4O4	3	2	3	0	0	4	0.8836	122.82	4	4	439.757	Clc1c2N(C=C(C(=O)[O-])C(=O)c2cc(F)c1N1CC(O)C1)c1nc(N)c(F)cc1F		ABT-492;WQ-3034;189279-58-1;Delafloxacin;WQ-3034, ABT492, ABT-492;Delafloxacin (USAN);S1553_Selleck;AC1LAFLM;DNC000132;RX-3341;ABT-492-Supplied by Selleck Chemicals;1-(6-AMINO-3,5-DIFLUOROPYRIDIN-2-YL)-8-CHLORO-6-FLUORO-7-(3-HYDROXYAZETIDIN-1-YL)-4-OXO-1,4-DIHYDROQUINOLINE-3-CARBOXYLIC ACID;D09330;A-319492;1-(6-amino-3,5-difluoropyridin-2-yl)-8-chloro-6-fluoro-7-(3-hydroxyazetidin-1-yl)-4-oxoquin…	1-[6-azanyl-3,5-bis(fluoranyl)pyridin-2-yl]-8-chloranyl-6-fluoranyl-7-(3-oxidanylazetidin-1-yl)-4-oxidanylidene-quinoline-3-carboxylic acid;ABT-492 is a new fluoroquinolone against 155 aerobic and 171 anaerobic pathogens.;Activity: Antibacterial;Hetrocycles, 4-Membered Ring;InChIKey: DYDCPNMLZGFQTM-UHFFFAOYSA-N;NIAID ChemDB HIV, Opportunistic Infections and Tuberculosis Therapeutics Database;Quin…
269	Antibacterial		9802884	Pradofloxacin	Quinolone	Quinolone	Topoisomerase	InChI=1S/C21H21FN4O3/c22-16-6-13-18(26(12-3-4-12)9-15(20(13)27)21(28)29)14(7-23)19(16)25-8-11-2-1-5-24-17(11)10-25/h6,9,11-12,17,24H,1-5,8,10H2,(H,28,29)/t11-,17+/m0/s1	LZLXHGFNOWILIY-APPDUMDISA-N	7-[(4aS,7aS)-1,2,3,4,4a,5,7,7a-octahydropyrrolo[3,4-b]pyridin-6-yl]-8-cyano-1-cyclopropyl-6-fluoro-4-oxoquinoline-3-carboxylic acid	C21H21FN4O3	2	0	4	0	1	5	-0.341716	104.08	4	3	396.422	Fc1cc2c(N(C=C(C(=O)[O-])C2=O)C2CC2)c(C#N)c1N1CC2C([NH2+]CCC2)C1		Pradofloxacin;UNII-6O0T5E048I;CHEMBL1256815;195532-12-8
270	Antibacterial		10224595	Besifloxacin	Quinolone	Quinolone	Topoisomerase	InChI=1S/C19H21ClFN3O3.ClH/c20-15-16-12(18(25)13(19(26)27)9-24(16)11-4-5-11)7-14(21)17(15)23-6-2-1-3-10(22)8-23;/h7,9-11H,1-6,8,22H2,(H,26,27);1H/t10-;/m1./s1	PMQBICKXAAKXAY-HNCPQSOCSA-N	7-[(3R)-3-aminoazepan-1-yl]-8-chloro-1-cyclopropyl-6-fluoro-4-oxoquinoline-3-carboxylic acid hydrochloride	C19H22Cl2FN3O3	1	0	3	0	0	4	0.8788	91.32	3	3	393.846	Clc1c2N(C=C(C(=O)[O-])C(=O)c2cc(F)c1N1CC([NH3+])CCCC1)C1CC1		Besifloxacin hydrochloride;405165-61-9;Besivance;Besifloxacin HCl;Besivance (TN);CHEMBL1201761;UNII-7506A6J57T;Besifloxacin hydrochloride (USAN);D08872	Activity: Anti-infective;ATC code: S01AX23
271	Antibacterial	DB02703	3000226	Fusidic Acid	Steroid	Miscellaneous	Protein	InChI=1S/C31H48O6/c1-17(2)9-8-10-20(28(35)36)26-22-15-24(34)27-29(5)13-12-23(33)18(3)21(29)11-14-30(27,6)31(22,7)16-25(26)37-19(4)32/h9,18,21-25,27,33-34H,8,10-16H2,1-7H3,(H,35,36)/b26-20-/t18-,21-,22-,23+,24+,25-,27-,29-,30-,31-/m0/s1	IECPWNUMDGFDKC-MZJAQBGESA-N	(2Z)-2-[(3R,4S,5S,8S,9S,10S,11R,13R,14S,16S)-16-acetyloxy-3,11-dihydroxy-4,8,10,14-tetramethyl-2,3,4,5,6,7,9,11,12,13,15,16-dodecahydro-1H-cyclopenta[a]phenanthren-17-ylidene]-6-methylhept-5-enoic acid	C31H48O6	3	2	6	1	1	4	4.3314	106.89	0	6	515.711	O(C(=O)C)C1CC2(C(CC(O)C3C2(CCC2C(C)C(O)CCC23C)C)C1=C(CCC=C(C)C)C(=O)[O-])C	Protein Synthesis Inhibitors;Anti-Bacterial Agents;Pharmacologic Actions;Chemical Actions and Uses;Enzyme Inhibitors;Molecular Mechanisms of Pharmacological Action;Anti-Infective Agents;Therapeutic Uses	fusidic acid;Fusidine;Ramycin;Fucidin acid;FUCIDIN;Fucidic acid;Diethanolamine fusidate;Fucithalmic;Fucidate;Fusidate;Acide fusidique;Acido fusidico;Fucidate Sodium;Acidum fusidicum;1qca;Fucidin Cream 2%;Fusidate sodium;6990-06-3;CHEBI:29013;Prestwick2_000390;Fusidic acid (USAN/INN);AC1MHD21;SQ 16603;F0756_SIGMA;MLS001332649;MLS001332650;MLS002207094;SQ 16,603;CHEMBL374975;F0756_SIAL;NSC56192;AKO…	Human Data;http://mlsmr.evotec.com/MLSMR_HomePage/pdf/pubchem_reference.pdf;"For further information visit GEO Series Microarray Experiment Accession ID GSE12210 <a href=""http://www.ncbi.nlm.nih.gov/geo/query/acc.cgi?acc=GSE12210target=_blank"">Display GEO Series Webpage</a>";Groups: approved;Steroids;DTP/NCI DIS cdk 1.4.4. Release-October 2011.;Target: protein synthesis inhibitor;"Substance inc…
272	Antibacterial	DB01369	5388937	Quinupristin	Streptogramin	Miscellaneous	50S Ribosome	InChI=1S/C53H67N9O10S/c1-6-37-50(68)61-23-11-14-38(61)51(69)59(5)40(26-32-16-18-36(19-17-32)58(3)4)52(70)62-28-35(30-73-43-29-60-24-20-33(43)21-25-60)42(64)27-39(62)47(65)57-45(34-12-8-7-9-13-34)53(71)72-31(2)44(48(66)55-37)56-49(67)46-41(63)15-10-22-54-46/h7-10,12-13,15-19,22,31,33,35,37-40,43-45,63H,6,11,14,20-21,23-30H2,1-5H3,(H,55,66)(H,56,67)(H,57,65)/t31-,35+,37-,38+,39+,40+,43-,44+,45+/m1/…	WTHRRGMBUAHGNI-LCYNINFDSA-N		C53H67N9O10S	10	4	11	2	4	8	1.00187	232.4	9	10	1023.25	S(CC1CN2C(CC1=O)C(=O)NC(c1ccccc1)C(OC(C)C(NC(=O)c1ncccc1O)C(=O)NC(CC)C(=O)N1C(CCC1)C(=O)N(C)C(Cc1ccc(N(C)C)cc1)C2=O)=O)C1C2CC[NH+](C1)CC2	Pharmacologic Actions;Therapeutic Uses;Anti-Bacterial Agents;Anti-Infective Agents;Chemical Actions and Uses	Quinupristin;RP-57669;Quinupristin [USAN:INN];Quinupristine [INN-French];Quinupristinum [INN-Latin];Quinupristina [INN-Spanish];CHEMBL1200649;RP 57669;LS-172437;5delta-(3-quinuclidinyl)thiomethylpristinamycin IA;N-((6R,9S,10R,13S,15aS,18R,22S,24aS)-22-(p-(Dimethylamino)benzyl)-6-ethyldocosahydro-10,23-dimethyl-5,8,12,15,17,21,24-heptaoxo-13-phenyl-18-(((3S)-3-quinuclidinylthio)methyl)-12H-pyrido(…	Crystal Structure Of Quinupristin Bound To The G2099a Mutant 50s Ribosomal Subunit Of Haloarcula Marismortui;Crystal Structure Of Quinupristin Bound To The G2099a Mutant Ribosomal Subunit Of Haloarcula Marismortui Quinupristin, Dalfopristin, Streptogramin, Antibiotic, Mutat Subunits, Ribosome, Ribosome-Antibiotic Complex Mol_id: 1; Molecule: 23s Ribosomal Rna; Chain: 0; Engineered: Yes; Mutation:…
273	Antibacterial	DB01764	6323289	Dalfopristin	Streptogramin	Miscellaneous	50S Ribosome	InChI=1S/C34H50N4O9S/c1-7-37(8-2)16-17-48(44,45)28-13-15-38-31(28)34(43)47-32(22(3)4)24(6)11-12-29(41)35-14-9-10-23(5)18-25(39)19-26(40)20-30-36-27(21-46-30)33(38)42/h9-12,18,21-22,24-25,28,31-32,39H,7-8,13-17,19-20H2,1-6H3,(H,35,41)/b10-9+,12-11+,23-18+/t24-,25-,28-,31-,32-/m1/s1	SUYRLXYYZQTJHF-VMBLUXKRSA-N		C34H50N4O9S	8	2	7	2	3	3	0.85217	177.62	4	9	691.867	S(=O)(=O)(CC[NH+](CC)CC)C1C2N(CC1)C(=O)c1nc(oc1)CC(=O)CC(O)C=C(C=CCNC(=O)C=CC(C)C(OC2=O)C(C)C)C	DALFOPRISTIN;CHEMBL1200937;CHEBI:42127;DOL;112362-50-2;5-(2-DIETHYLAMINO-ETHANESULFONYL)-21-HYDROXY-10-ISOPROPYL-11,19-DIMETHYL-9,26-DIOXA-3,15,28-TRIAZA-TRICYCLO[23.2.1.00,255]OCTACOSA-1(27),12,17,19,25(28)-PENTAENE-2,8,14,23-TETRAONE	Mycins;NIAID ChemDB HIV, Opportunistic Infections and Tuberculosis Therapeutics Database	Chemical Actions and Uses;Pharmacologic Actions;Therapeutic Uses;Anti-Bacterial Agents;Anti-Infective Agents
274	Antibacterial	DB00263	5344	Sulfisoxazole	Sulfonamides	Sulfonamides	Antifolate	InChI=1S/C11H13N3O3S/c1-7-8(2)13-17-11(7)14-18(15,16)10-5-3-9(12)4-6-10/h3-6,14H,12H2,1-2H3	NHUHCSRWZMLRLA-UHFFFAOYSA-N	4-amino-N-(3,4-dimethyl-1,2-oxazol-5-yl)benzenesulfonamide	C11H13N3O3S	1	1	3	0	0	2	2.26774	86.19	3	3	266.301	S(=O)([O-])(=Nc1onc(C)c1C)c1ccc(N)cc1	Chemical Actions and Uses;Anti-Infective Agents;Therapeutic Uses;Pharmacologic Actions	sulfisoxazole;Sulfafurazole;Sulphafurazole;Sulfofurazole;Sulfafurazol;Sulfaisoxazole;Sulfisoxasole;Sulfisoxazol;Amidoxal;Gantrisin;Sulfoxol;Sulphaisoxazole;Accuzole;Alphazole;Renosulfan;Sulfalar;Sulfizin;Roxosul tablets;Sulfadimethylisoxazole;Sulfisoxazole dialamine;Cosoxazole;Gantrisona;Sulphafurazolum;Chemouag;Entusil;Entusul;Gantrosan;Isoxamin;Neazolin;Neoxazol;Soxisol;Soxomide;Stansin;Sulfaga…	the literature. Click on these links to find specific, curated data for this chemical at CTD:;MLSMR_SAMPLE_SUPPLIER: Peter Wipf - Univ. of Pittsburgh - MLI CMLD;HTS COLLECTION;NIAID ChemDB HIV, Opportunistic Infections and Tuberculosis Therapeutics Database;The Comparative Toxicogenomics Database (CTD) promotes understanding about the effects of environmental chemicals;InChIKey: NHUHCSRWZMLRLA-UH…
275	Antibacterial	DB00359	5215	Sulfadiazine	Sulfonamides	Sulfonamides	Antifolate	InChI=1S/C10H10N4O2S/c11-8-2-4-9(5-3-8)17(15,16)14-10-12-6-1-7-13-10/h1-7H,11H2,(H,12,13,14)	SEEPANYCNGTZFQ-UHFFFAOYSA-N	4-amino-N-pyrimidin-2-ylbenzenesulfonamide	C10H10N4O2S	4	2	3	0	0	2	0.8596	97.97	4	2	250.282	S(=O)(=O)(Nc1ncccn1)c1ccc(N)cc1	Antiparasitic Agents;Antiprotozoal Agents;Coccidiostats;Pharmacologic Actions;Chemical Actions and Uses;Therapeutic Uses;Anti-Infective Agents	sulfadiazine;Sulphadiazine;Sulfapyrimidine;Sulfazine;Sulfadiazene;Sulfadiazin;Cremodiazine;Eskadiazine;Liquadiazine;Microsulfon;Neotrizine;Quadramoid;Sanodiazine;Spofadrizine;Sulfapyrimidin;Theradiazine;Trifonamide;Adiazin;Adiazine;Cremotres;Debenal;Deltazina;Diazolone;Neazine;Palatrize;Piridisir;Pirimal;Pyrimal;Quadetts;Sterazine;Sulfatryl;Sulfolex;Sulfonsol;Sulfose;Terfonyl;Truozine;Diazin;Diaz…	<a href="http://www.tci-uk.co.uk/catalog/S0579.html">TCI UK</a>;Stock_Building_Blocks;Whole Molecule;Drug / Therapeutic Agent;http://mlsmr.evotec.com/MLSMR_HomePage/pdf/pubchem_reference.pdf;"<a href=""http://www.tci-asiapacific.com/catalog/S0579.html"">TCI (Asia/Pacific Site)</a>";SODIUM SALT;"<a target=_blank href=""mailto:info@seqchem.com?SUBJECT=price and availability of 68-35-9"">Sequoia Res…
276	Antibacterial	DB00576	5328	Sulfamethizole	Sulfonamides	Sulfonamides	Antifolate	InChI=1S/C9H10N4O2S2/c1-6-11-12-9(16-6)13-17(14,15)8-4-2-7(10)3-5-8/h2-5H,10H2,1H3,(H,12,13)	VACCAVUAMIDAGB-UHFFFAOYSA-N	4-amino-N-(5-methyl-1,3,4-thiadiazol-2-yl)benzenesulfonamide	C9H10N4O2S2	4	2	3	0	0	2	1.22952	97.97	4	2	270.337	s1c(nnc1NS(=O)(=O)c1ccc(N)cc1)C	Chemical Actions and Uses;Therapeutic Uses;Anti-Infective Agents;Pharmacologic Actions	sulfamethizole;Sulfamethizol;Sulphamethizole;Rufol;Thiosulfil;Sulfamethizolum;Sulfametizol;Ayerlucil;Methazol;Microsul;Sulfapyelon;Sulfstat;Sulfurine;Tetracid;Thidicur;Ultrasul;Urocydal;Urodiaton;Urolucosil;Urosulfin;Lucosil;Proklar;Renasul;Salimol;Famet;Sulfamethylthiadiazole;Uroz;Sulfa gram;Solfametizolo;Solfametizolo [DCIT];144-82-1;Thiosulfil Forte;Thiosulfil-A-Forte;Sulfametizol [INN-Spanish…	Structure Shown: tested chemical;"<a href=""http://www.tcieurope.eu/en/catalog/S0360.html"">TCI Europe</a>";FDA_Orange_Book_Extended;"Substance included in EPA DSSTox FDAMDD: FDA Maximum (Recommended) Daily Dose Database File <a href=""http://www.epa.gov/ncct/dsstox/sdf_fdamdd.html""target=""_blank"">[link to DSSTox SDF Download Page]</a>";"<a href=""http://www.tokyokasei.co.jp/catalog/S0360.html…
277	Antibacterial	DB06150	5323	Sulfadimethoxine	Sulfonamides	Sulfonamides	Antifolate	InChI=1S/C12H14N4O4S/c1-19-11-7-10(14-12(15-11)20-2)16-21(17,18)9-5-3-8(13)4-6-9/h3-7H,13H2,1-2H3,(H,14,15,16)	ZZORFUFYDOWNEF-UHFFFAOYSA-N	4-amino-N-(2,6-dimethoxypyrimidin-4-yl)benzenesulfonamide	C12H14N4O4S	4	2	5	0	0	2	0.8768	116.43	4	4	310.334	S(=O)(=O)(Nc1nc(OC)nc(OC)c1)c1ccc(N)cc1	Pharmacologic Actions;Anti-Infective Agents;Chemical Actions and Uses;Therapeutic Uses	sulfadimethoxine;Sulphadimethoxine;Sulfadimethoxydiazine;Sulfadimethoxin;Sulfadimetoxin;Sulfadimetoxina;Agribon;Deposul;Dimetazina;Albon;Sulfadimethoxinum;122-11-2;Dimethoxysulfadiazine;Arnosulfan;Neostrepal;Theracanzan;Bactrovet;Diasulfa;Diasulfyl;Dinosol;Dorisul;Madribon;Madrigid;Madriqid;Madroxin;Madroxine;Maxulvet;Memcozine;Metoxidon;Omnibon;Persulfen;Radonin;Redifal;Roscosulf;Scandisil;Sulfa…	DTP/NCI DIS cdk 1.4.4. Release-October 2011.;"<a href=""http://ctd.mdibl.org/detail.go?view=disease&type=chem&acc=D013412"">Diseases</a>";Indication: For use in the treatment of infections.;"For further information visit the FDA Maximum Recommended Therapeutic Dose Database <a href=""http://www.fda.gov/AboutFDA/CentersOffices/CDER/ucm092199.htm""target=""_blank"">Website</a>";Deposition record cr…
278	Antibacterial	DB00634	5320	Sulfacetamide	Sulfonamides	Sulfonamides	Antifolate	InChI=1S/C8H10N2O3S/c1-6(11)10-14(12,13)8-4-2-7(9)3-5-8/h2-5H,9H2,1H3,(H,10,11)	SKIVFJLNDNKQPD-UHFFFAOYSA-N	N-(4-aminophenyl)sulfonylacetamide	C8H10N2O3S	0	1	3	0	0	1	0.8777	77.23	2	3	213.237	S(=O)([O-])(=NC(=O)C)c1ccc(N)cc1	Anti-Infective Agents, Local;Therapeutic Uses;Anti-Infective Agents, Urinary;Chemical Actions and Uses;Pharmacologic Actions;Anti-Infective Agents;Renal Agents	sulfacetamide;Sulphacetamide;N-Acetylsulfanilamide;Acetosulfamine;Sulfanilacetamide;N-Sulfanilylacetamide;N-Sulphanilylacetamide;Acetosulfamin;Sulfacetimide;Sulphacetamidum;Urosulfone;Acetocid;Albamine;Albucid;Alesten;Oclucid;Steramide;Sulamyd;Sulfacet;Sulfacyl;Sulphasil;Urosulfon;Region;Sulfanilazetamid;Formosulfacetamide;N-Acetyl-4-aminobenzenesulfonamide;p-Aminobenzenesulfonacetamide;Sulfaceta…	Indication: For the treatment of bacterial vaginitis, keratitis, acute conjunctivitis, and blepharitis.;"<a href=""http://www.tci-uk.co.uk/catalog/S0577.html"">TCI UK</a>";Reproductive Effect;"For further information visit the NTP Study <a href=""http://ntp-apps.niehs.nih.gov/ntp_tox/index.cfm?fuseaction=ntpsearch.ntpstudiesforchemical&cas_no=144-80-9""target=""_blank"">Chemical Results Webpage</…
279	Antibacterial		9047	Sulfalene	Sulfonamides	Sulfonamides	Antifolate	InChI=1S/C11H12N4O3S/c1-18-11-10(13-6-7-14-11)15-19(16,17)9-4-2-8(12)3-5-9/h2-7H,12H2,1H3,(H,13,15)	KXRZBTAEDBELFD-UHFFFAOYSA-N	4-amino-N-(3-methoxypyrazin-2-yl)benzenesulfonamide	C11H12N4O3S	4	2	4	0	0	2	0.8682	107.2	4	3	280.308	S(=O)(=O)(Nc1nccnc1OC)c1ccc(N)cc1	Anti-Infective Agents, Urinary;Chemical Actions and Uses;Pharmacologic Actions;Therapeutic Uses;Anti-Infective Agents;Antimalarials;Antiparasitic Agents;Antiprotozoal Agents;Renal Agents	SULFALENE;Sulfamethopyrazine;Sulfalen;Sulfamethoxypyrazine;Dalysep;Kelfizin;Kelfizina;Kelfizine;Polycidal;Longum;Sulfametopyrazine;Kelfizine W;Sulfapyrazinemethoxine;Sulfapyrazinemethoxyne;Sulfapyrazinemethoxyine;SMP2;3-Methoxy-2-sulfapyrazine;Sulfalenum;Solfametopirazina;3-Methoxypyrazine sulfanilamide;Sulfalenum [INN-Latin];Farmitalia 204/122;Solfametopirazina [DCIT];Sulfaleno [INN-Spanish];Sul…	Drug / Therapeutic Agent;Whole Molecule;MLSMR_SAMPLE_SUPPLIER: InterBioScreen;InChIKey: KXRZBTAEDBELFD-UHFFFAOYSA-N;ATC code: J01ED02;Structure Evaluation:Consistent with Molecular Formula.;Indication: For the treatment of urinary tract infection and chronic bronchitis.;MLSMR_COMPOUND_CLASS: DC;Mechanism of action: Sulfametopyrazine is a competitive inhibitor of the bacterial enzyme dihydropteroa…
280	Antibacterial	DB00891	5336	Sulfapyridine	Sulfonamides	Sulfonamides	Antifolate	InChI=1S/C11H11N3O2S/c12-9-4-6-10(7-5-9)17(15,16)14-11-3-1-2-8-13-11/h1-8H,12H2,(H,13,14)	GECHUMIMRBOMGK-UHFFFAOYSA-N	4-amino-N-pyridin-2-ylbenzenesulfonamide	C11H11N3O2S	3	2	3	0	0	2	1.4646	85.08	3	2	249.294	S(=O)(=O)(Nc1ncccc1)c1ccc(N)cc1	Anti-Infective Agents;Therapeutic Uses;Chemical Actions and Uses;Pharmacologic Actions;Dermatologic Agents	sulfapyridine;Sulphapyridine;2-Sulfapyridine;Sulfidin;Sulfidine;2-Sulfanilamidopyridine;Streptosilpyridine;Coccoclase;Relbapiridina;Septipulmon;Thioseptal;Adiplon;Dagenan;Eubasin;Eubasinum;Haptocil;Piridazol;Plurazol;Pyriamid;Pyridazol;Trianon;Ronin;2-Sulfanilylaminopyridine;Solfapiridina;Sulfapiridina;Sulfapyridinum;144-83-2;2-Sulfanilamidopyridin;Sulphapyridin;N-2-Pyridylsulfanilamide;2-Sulfani…	<a target=_blank href="mailto:sales@sinovainc.com?SUBJECT=price and availability of SL-00483">Sinova SL-00483</A>;Sigma Chemical Company:S6252;"<a href=""http://www.tci-india.com/catalog/S0071.html"">TCI India</a>";Groups: approved;"<a target=_blank href=""mailto:sales@ukrorgsynth.com?SUBJECT=price and availability of PB271082326"">UORSY PB271082326</A>";http://mlsmr.evotec.com/MLSMR_HomePage/pdf…
[truncated: 37 more rows]

## Sheet: Non-antibacterial_Data
Number	Database	PubChem_ID	HBA	HBD	nN	nO	RB	SlogP	TPSA	Weight	LV	OV	Rings	Smiles
1	Non-antibacterial	2762	6	2	2	5	2	0.8785	88.43	262.221	0	0	3	O1c2c(OC1)cc1N(N=C(C(O)=O)C(=O)c1c2)CC
2	Non-antibacterial	4495	2	1	2	5	5	2.7586	101.22	308.314	0	0	2	S(=O)(=O)(Nc1ccc([N+](=O)[O-])cc1Oc1ccccc1)C
3	Non-antibacterial	5094	2	1	4	4	4	0.5492	115.96	200.154	0	0	1	O(Cc1ncc([N+](=O)[O-])n1C)C(=O)N
[truncated: 314 more rows]

## Sheet: Human_Drugs_Data
Number	Database	PubChem_ID	Generic_Name	HBA	HBD	nN	nO	RB	SlogP	TPSA	Weight	LV	OV	Rings	Smiles
[truncated: 527 more rows]
